# Supplementary material for: Solvent-switchable regioselective 1,2- or 1,6-addition of quinones with boronic acids
Source: Royal Society of Chemistry journal article supplement (doi:10.1039/d3cc01968c), 2023-01-01

*Supporting Information*

**Solvent-Switchable Regioselective 1,2- or 1,6-Addition  
of Quinones with Boronic Acids**

Qi Xia, Yaxuan Zhou, Xiaoning Yang, Yanqiu Zhang, Jiayi Wang and Gonghua Song\*

Shanghai Key Laboratory of Chemical Biology, School of Pharmacy, East China

University of Science and Technology, Shanghai, 200237, PR China.

---

## Table of Contents

|                                                                             |     |
|-----------------------------------------------------------------------------|-----|
| 1. General information .....                                                | S3  |
| 2. Experimental section .....                                               | S4  |
| 2.1 Experimental optimization .....                                         | S4  |
| 2.2 General procedure for 1,2-addition of quinones with boronic acids ..... | S5  |
| 2.3 General procedure for 1,6-addition of quinones with boronic acids ..... | S5  |
| 2.4 General procedure for one-pot construction of 4-phenylphenols .....     | S6  |
| 2.5 Gram scale-up and transformation of products .....                      | S6  |
| 3. Characterization of Products .....                                       | S9  |
| 4. Mechanistic Investigations.....                                          | S33 |
| 4.1 Control experiments.....                                                | S33 |
| 4.2 Free Radical Capture Experiment .....                                   | S34 |
| 5. References .....                                                         | S35 |
| 6. NMR spectra.....                                                         | S36 |

---

## 1. General information

All commercially available reagents were used without further purification unless otherwise stated. Melting points were recorded on an EZ-melt MPA120 (Stanford Research Systems, Inc., USA) and are uncorrected. The  $^1\text{H}$  NMR and  $^{13}\text{C}$  NMR spectra were recorded on a Bruker AM-400 spectrometer (400 MHz and 100 MHz, respectively) with  $\text{CDCl}_3$  as the solvent and TMS as internal standard. Chemical shifts are given in ppm ( $\delta$ ) referenced to  $\text{CDCl}_3$  with 7.25 for  $^1\text{H}$  and 77.05 for  $^{13}\text{C}$ , and to  $\text{DMSO}-d_6$  with 2.50 for  $^1\text{H}$  and 39.47 for  $^{13}\text{C}$ . Coupling constants  $J$  are reported in Hz. Proton coupling patterns were described as singlet (s), doublet (d), triplet (t), quartet (q), and multiple (m). Analytical thin-layer chromatography (TLC) was carried out on precoated plates (silica gel 60 F254), and spots were visualized under ultraviolet light. Gas chromatography-mass spectrometry (GC-MS) was performed on Agilent 7890A/5975C and gas chromatograms (GC) were recorded on Agilent 7890A. High-resolution mass spectra were recorded under electron impact (70 eV) condition using a MicroMass GCT CA 055 instrument. High performance liquid chromatograms (HPLC) were recorded on Agilent 1260 Infinity.

## 2. Experimental section

### 2.1 Experimental optimization

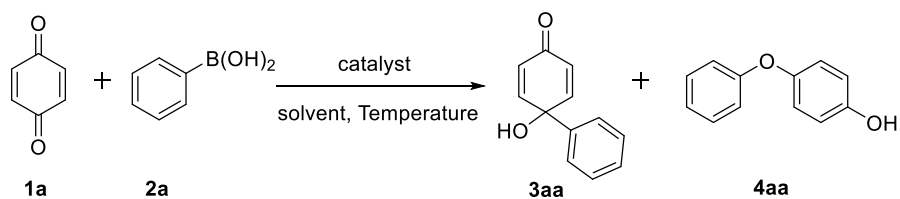

| Entry <sup>a</sup> | Catalyst                                               | Solvent            | temp. (°C) | Yield <sup>b</sup> (%) |     |
|--------------------|--------------------------------------------------------|--------------------|------------|------------------------|-----|
|                    |                                                        |                    |            | 3aa                    | 4aa |
| 1                  | CuCl                                                   | H <sub>2</sub> O   | 25         | 37                     | 0   |
| 2                  | CuCl <sub>2</sub> ·2H <sub>2</sub> O                   | H <sub>2</sub> O   | 25         | 8                      | 0   |
| 3                  | CuBr                                                   | H <sub>2</sub> O   | 25         | 42                     | 0   |
| 4                  | CuBr <sub>2</sub>                                      | H <sub>2</sub> O   | 25         | 12                     | 0   |
| 5                  | CuI                                                    | H <sub>2</sub> O   | 25         | 35                     | 0   |
| 6                  | CH <sub>3</sub> COOCu                                  | H <sub>2</sub> O   | 25         | 7                      | 0   |
| 7                  | Cu(CH <sub>3</sub> COO) <sub>2</sub> ·H <sub>2</sub> O | H <sub>2</sub> O   | 25         | < 5                    | 0   |
| 8                  | CuSO <sub>4</sub>                                      | H <sub>2</sub> O   | 25         | < 5                    | 0   |
| 9                  | Cu(acac) <sub>2</sub>                                  | H <sub>2</sub> O   | 25         | < 5                    | 0   |
| 10                 | Cu                                                     | H <sub>2</sub> O   | 25         | 47                     | 0   |
| 11                 | CuO                                                    | H <sub>2</sub> O   | 25         | 38                     | 0   |
| 12                 | Cu <sub>2</sub> O                                      | H <sub>2</sub> O   | 25         | 86                     | 0   |
| 13                 | Cu(OH) <sub>2</sub>                                    | H <sub>2</sub> O   | 25         | 80                     | 0   |
| 14                 | Cu <sub>2</sub> (OH) <sub>2</sub> CO <sub>3</sub>      | H <sub>2</sub> O   | 25         | 78                     | 0   |
| 15                 | CuFe <sub>2</sub> O <sub>4</sub>                       | H <sub>2</sub> O   | 25         | 0                      | 0   |
| 16                 | Cu <sub>2</sub> O                                      | MeOH               | 25         | 8                      | 81  |
| 17                 | Cu <sub>2</sub> O                                      | EtOH               | 25         | < 5                    | 12  |
| 18                 | Cu <sub>2</sub> O                                      | <i>t</i> -BuOH     | 25         | < 5                    | < 5 |
| 19                 | Cu <sub>2</sub> O                                      | <i>i</i> -PrOH     | 25         | < 5                    | < 5 |
| 20                 | Cu <sub>2</sub> O                                      | CH <sub>3</sub> CN | 25         | 0                      | 0   |
| 21                 | Cu <sub>2</sub> O                                      | DMF                | 25         | 0                      | 0   |
| 22                 | Cu <sub>2</sub> O                                      | DMSO               | 25         | 0                      | 0   |
| 23                 | Cu <sub>2</sub> O                                      | Toluene            | 25         | 0                      | 0   |
| 24                 | Cu <sub>2</sub> O                                      | 1,4-Dioxane        | 25         | 0                      | 0   |
| 25                 | Cu <sub>2</sub> O                                      | THF                | 25         | 0                      | 0   |
| 26                 | Cu <sub>2</sub> O                                      | DCM                | 25         | 0                      | 0   |
| 27                 | Cu <sub>2</sub> O                                      | H <sub>2</sub> O   | 0          | 40                     | 0   |
| 28                 | Cu <sub>2</sub> O                                      | H <sub>2</sub> O   | 40         | 70                     | 6   |
| 29                 | Cu <sub>2</sub> O                                      | H <sub>2</sub> O   | 60         | 63                     | 12  |
| 30                 | Cu <sub>2</sub> O (2 mol%)                             | H <sub>2</sub> O   | 25         | 88 (82)                | 0   |
| 31                 | Cu <sub>2</sub> O (1 mol%)                             | H <sub>2</sub> O   | 25         | 58                     | 0   |
| 32                 | CuCl                                                   | MeOH               | 25         | < 5                    | 20  |
| 33                 | CuCl <sub>2</sub> ·2H <sub>2</sub> O                   | MeOH               | 25         | < 5                    | 10  |



|    |                                                        |                                 |    |     |         |
|----|--------------------------------------------------------|---------------------------------|----|-----|---------|
| 34 | CuBr                                                   | MeOH                            | 25 | < 5 | 31      |
| 35 | CuBr <sub>2</sub>                                      | MeOH                            | 25 | < 5 | 18      |
| 36 | CuI                                                    | MeOH                            | 25 | < 5 | 32      |
| 37 | CH <sub>3</sub> COOCu                                  | MeOH                            | 25 | < 5 | 20      |
| 38 | Cu(CH <sub>3</sub> COO) <sub>2</sub> ·H <sub>2</sub> O | MeOH                            | 25 | < 5 | 13      |
| 39 | CuSO <sub>4</sub>                                      | MeOH                            | 25 | < 5 | < 5     |
| 40 | Cu(acac) <sub>2</sub>                                  | MeOH                            | 25 | < 5 | 10      |
| 41 | Cu                                                     | MeOH                            | 25 | 10  | 65      |
| 42 | CuO                                                    | MeOH                            | 25 | 6   | 61      |
| 43 | Cu(OH) <sub>2</sub>                                    | MeOH                            | 25 | 6   | 75      |
| 44 | Cu <sub>2</sub> (OH) <sub>2</sub> CO <sub>3</sub>      | MeOH                            | 25 | 8   | 70      |
| 45 | CuFe <sub>2</sub> O <sub>4</sub>                       | MeOH                            | 25 | 0   | 91 (86) |
| 46 | Cu <sub>2</sub> O                                      | H <sub>2</sub> O : MeOH = 3 : 1 | 25 | 70  | < 5     |
| 47 | Cu <sub>2</sub> O                                      | H <sub>2</sub> O : MeOH = 1 : 1 | 25 | 50  | < 5     |
| 48 | Cu <sub>2</sub> O                                      | H <sub>2</sub> O : MeOH = 1 : 3 | 25 | 38  | 7       |
| 49 | CuFe <sub>2</sub> O <sub>4</sub>                       | H <sub>2</sub> O : MeOH = 3 : 1 | 25 | 0   | 0       |
| 50 | CuFe <sub>2</sub> O <sub>4</sub>                       | H <sub>2</sub> O : MeOH = 1 : 1 | 25 | 0   | 0       |
| 51 | CuFe <sub>2</sub> O <sub>4</sub>                       | H <sub>2</sub> O : MeOH = 1 : 3 | 25 | 0   | 0       |

<sup>a</sup> Reaction conditions: **1a** (1.0 mmol), **2a** (1.2 mmol), catalyst (0.05 mmol), solvent (2.0 mL).

<sup>b</sup> Yields were determined by HPLC analysis using biphenyl as internal standard; isolated yield in parenthesis.

## 2.2 General procedure for 1,2-addition of quinones with boronic acids

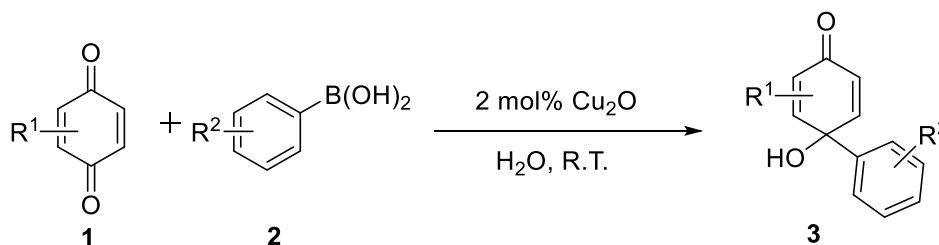

A 10 mL sealed tube equipped with a stirring bar was charged with quinones **1** (1.0 mmol), organic boronic acid **2** (1.2 mmol), Cu<sub>2</sub>O (2.9 mg, 0.02 mmol, 2.0 mol%) and H<sub>2</sub>O (2.0 mL). The tube was tightly capped and stirred at 25 °C for 24–36 h. Upon completion, the mixture was diluted with water (2.0 mL) and then extracted with ethyl acetate (5 ml × 3). The combined organic layers were dried over MgSO<sub>4</sub>, filtered, concentrated under reduced pressure, and purified by silica gel column chromatography using ethyl acetate and dichloromethane as the eluent to obtain the desired product. The products were further characterized by HRMS (EI), <sup>1</sup>H NMR, and <sup>13</sup>C NMR.

## 2.3 General procedure for 1,6-addition of quinones with boronic acids

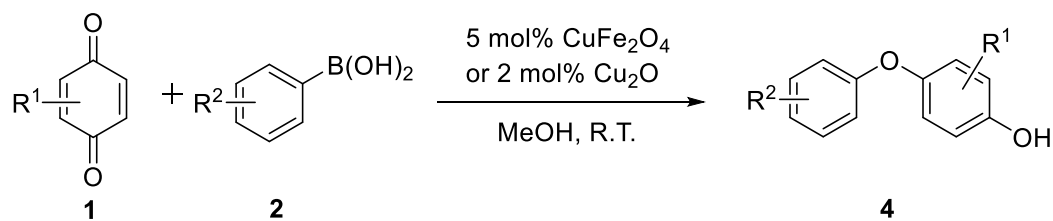

A 10 mL sealed tube equipped with a stirring bar was charged with quinones **1** (1.0 mmol), organic boronic acid **2** (1.2 mmol), CuFe<sub>2</sub>O<sub>4</sub> (12.0 mg, 0.05 mmol, 5.0 mol%) or Cu<sub>2</sub>O (2.9 mg, 0.02 mmol, 2.0 mol%) and MeOH (2.0 mL). The tube was tightly capped and stirred at 25 °C for 24-36 h. Upon completion, the mixture was diluted with 5 mL of ethyl acetate, filtered through a celite pad and washed with 10 mL of ethyl acetate. The filtrate was collected and concentrated. The residue was purified by silica gel column chromatography using ethyl acetate and petroleum ether as the eluent to obtain the desired product. The products were further characterized by HRMS (EI), <sup>1</sup>H NMR, and <sup>13</sup>C NMR.

## 2.4 General procedure for one-pot construction of 4-phenylphenols

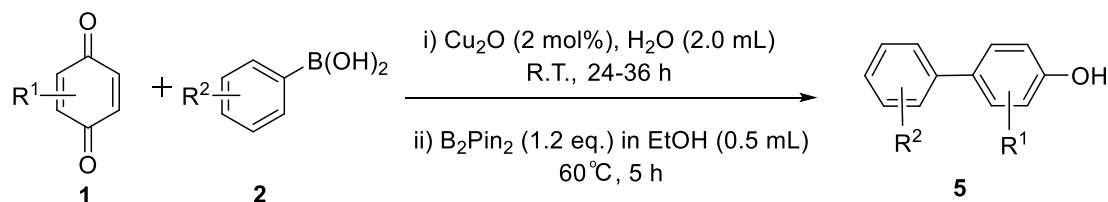

A 10 mL sealed tube equipped with a stirring bar was charged with quinones **1** (1.0 mmol), organic boronic acid **2** (1.2 mmol), Cu<sub>2</sub>O (2.9 mg, 0.02 mmol, 2.0 mol%) and H<sub>2</sub>O (2.0 mL). The tube was tightly capped and stirred at 25 °C for 24-36 h. Then B<sub>2</sub>pin<sub>2</sub> (1.2 mmol) dissolved in EtOH (0.5 mL) were added, the reaction mixture was stirred at 60 °C for 5 h. Upon completion, the mixture was diluted with water (2.0 mL) and then extracted with ethyl acetate (5 ml × 3). The combined organic layers were dried over MgSO<sub>4</sub>, filtered, concentrated under reduced pressure, and purified by silica gel column chromatography using ethyl acetate and petroleum ether as the eluent to obtain the desired product. The products were further characterized by HRMS (EI), <sup>1</sup>H NMR, and <sup>13</sup>C NMR.

## 2.5 Gram scale-up and transformation of products

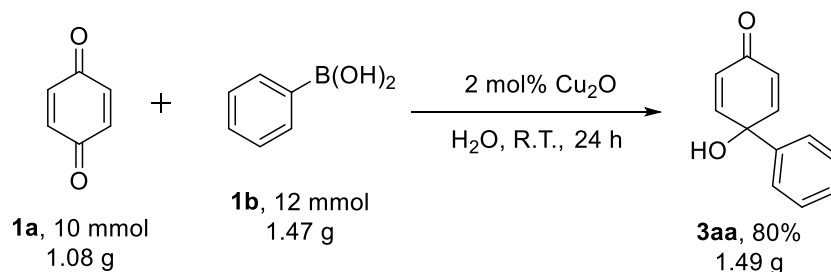

A 50 mL round-bottomed flask equipped with a stirring bar was charged with 1,4-benzoquinone **1a** (1.08 g, 10.0 mmol), phenylboronic acid **1b** (1.47 g, 12.0 mmol), Cu<sub>2</sub>O (28.6 mg, 0.2 mmol, 2.0 mol%) and H<sub>2</sub>O (20.0 mL). The reaction mixture was stirred at 25 °C for 24 h. Upon completion, the mixture was diluted with water (20.0 mL) and then extracted with ethyl acetate (25 ml × 3). The combined organic layers were dried over MgSO<sub>4</sub>, filtered,



carbamate (227.4 mg, 1.5 mmol, 1.5 equiv.) in Toluene (1.0 mL) was added and the mixture was stirred at reflux temperature for 4 h. Upon completion, the mixture was cooled to room temperature. And then the mixture was diluted with water (2.0 mL) and extracted with ethyl acetate (5 ml  $\times$  3). The combined organic layers were dried over MgSO<sub>4</sub>, filtered, concentrated under reduced pressure, and purified by silica gel column chromatography using PE/EtOAc (5/1) as the eluent to obtain fenoxycard as white solid (259.2 mg, 86% yield).<sup>1</sup>

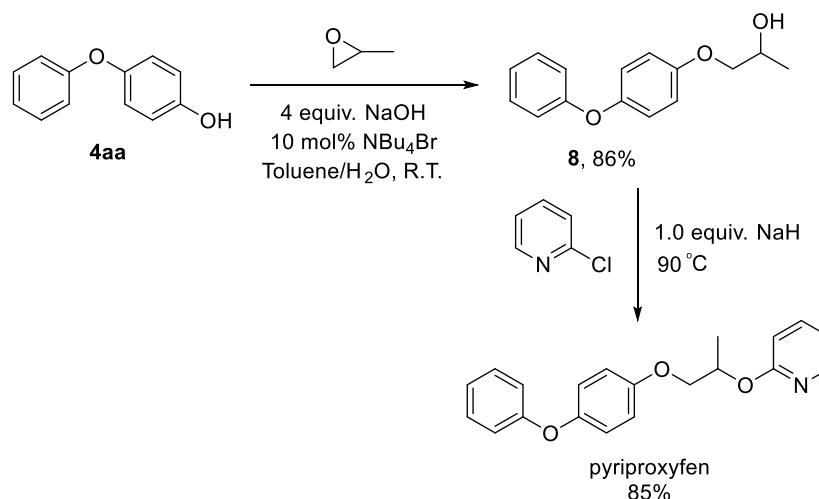

To a 10 mL round-bottomed flask was added **4aa** (186.2 mg, 1.0 mmol), propylene oxide (48.0 mg, 5.0 mmol), *n*Bu<sub>4</sub>NBr (32.2 mg, 0.1 mmol), NaOH (160.0 mg, 5.0 mmol) and Toluene/H<sub>2</sub>O (5/2, 2.0 mL). The reaction mixture was stirred at 25 °C for 2 d. Upon completion, the mixture was diluted with water (2.0 mL) and then extracted with ethyl acetate (5 ml  $\times$  3). The combined organic layers were dried over MgSO<sub>4</sub>, filtered, concentrated under reduced pressure, and purified by silica gel column chromatography using PE/EtOAc (5/1) as the eluent to obtain the intermediate **8** as white oil (210.1 mg, 86% yield).<sup>1</sup>

To a 10 mL round-bottomed flask was added **8** (122.1 mg, 0.5 mmol), 60% NaH (20.0 mg, 0.5 mmol) and 2-chloropyridin (2.0 mL) at 0 °C. The reaction mixture was stirred at 90 °C for 8 h. Upon completion, the mixture was cooled to room temperature. And then the mixture was diluted with water (2.0 mL) and extracted with ethyl acetate (5 ml  $\times$  3). The combined organic layers were dried over MgSO<sub>4</sub>, filtered, concentrated under reduced pressure, and purified by silica gel column chromatography using PE/EtOAc (10/1) as the eluent to obtain pyriproxyfen as white solid (136.6 mg, 85% yield).<sup>1</sup>

### 3. Characterization of Products

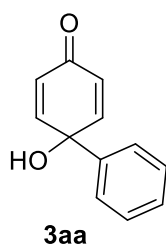

#### 1-hydroxy-[1,1'-biphenyl]-4(*1H*)-one

**3aa** was synthesized following the general procedure for 1,2-addition. After purification by preparative thin-layer chromatography using CH<sub>2</sub>Cl<sub>2</sub>/EtOAc (9/1) as the eluent, **3aa** was obtained in 82% yield (152.6 mg) as a yellow solid.

**3aa**: m.p. 107.8-108.9 °C; <sup>1</sup>H NMR (400 MHz, CDCl<sub>3</sub>) δ 7.48 (d, *J* = 8.1 Hz, 2H), 7.41 – 7.30 (m, 3H), 6.90 (d, *J* = 9.6 Hz, 2H), 6.21 (d, *J* = 9.5 Hz, 2H), 2.90 (s, 1H); <sup>13</sup>C NMR (101 MHz, CDCl<sub>3</sub>) δ 186.23, 151.46 (2C), 138.71, 128.95 (2C), 128.41, 126.65 (2C), 125.32 (2C), 70.99; HRMS (EI-TOF, *m/z*) calcd for C<sub>12</sub>H<sub>10</sub>O<sub>2</sub> [M]<sup>+</sup> 186.0681, found 186.0679.

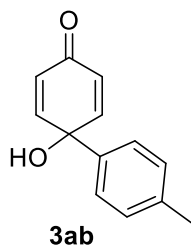

#### 1-hydroxy-4'-methyl-[1,1'-biphenyl]-4(*1H*)-one

**3ab** was synthesized following the general procedure for 1,2-addition. After purification by preparative thin-layer chromatography using CH<sub>2</sub>Cl<sub>2</sub>/EtOAc (9/1) as the eluent, **3ab** was obtained in 72% yield (144.2 mg) as a white solid.

**3ab**: m.p. 114.2-115.3 °C; <sup>1</sup>H NMR (400 MHz, CDCl<sub>3</sub>) δ 7.36 (m, *J* = 8.2 Hz, 2H), 7.18 (m, *J* = 8.1 Hz, 2H), 6.92 – 6.85 (m, 2H), 6.23 – 6.15 (m, 2H), 3.08 (s, 1H), 2.34 (s, 3H); <sup>13</sup>C NMR (101 MHz, CDCl<sub>3</sub>) δ 186.16, 151.47 (2C), 138.31, 135.77, 129.64 (2C), 126.54 (2C), 125.24 (2C), 70.89, 21.09. HRMS (EI-TOF, *m/z*) calcd for C<sub>13</sub>H<sub>12</sub>O<sub>2</sub> [M]<sup>+</sup> 200.0837, found 200.0838.

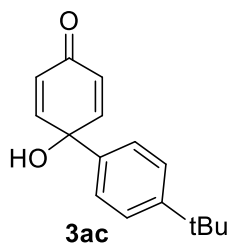

#### 4'-(*tert*-butyl)-1-hydroxy-[1,1'-biphenyl]-4(*1H*)-one

**3ac** was synthesized following the general procedure for 1,2-addition. After purification by preparative thin-layer chromatography using CH<sub>2</sub>Cl<sub>2</sub>/EtOAc (8/1) as the eluent, **3ac** was obtained in 60% yield (145.4 mg) as a white solid.

**3ac**: m.p. 113.9-114.7 °C; <sup>1</sup>H NMR (400 MHz, CDCl<sub>3</sub>) δ 7.40 (s, 4H), 6.94 – 6.87 (m, 2H), 6.25 – 6.19 (m, 2H), 2.52 (s, 1H), 1.31 (s, 9H); <sup>13</sup>C NMR (101 MHz, CDCl<sub>3</sub>) δ 185.94, 151.59, 151.13 (2C), 135.71, 126.69 (2C), 125.92 (2C), 125.02, 70.91, 34.60, 31.27 (3C). HRMS (EI-TOF, m/z) calcd for C<sub>16</sub>H<sub>18</sub>O<sub>2</sub> [M]<sup>+</sup> 242.1307, found 242.1312.

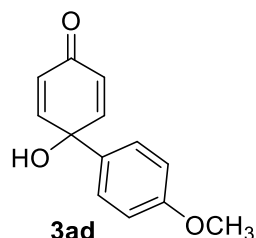

#### 1-hydroxy-4'-methoxy-[1,1'-biphenyl]-4(*1H*)-one

**3ad** was synthesized following the general procedure. After purification by preparative thin-layer chromatography using CH<sub>2</sub>Cl<sub>2</sub>/EtOAc (7/1) as the eluent, **3ad** was obtained in 65% yield (140.6 mg) as a white solid.

**3ad**: m.p. 119.9-121.6 °C; <sup>1</sup>H NMR (400 MHz, CDCl<sub>3</sub>) δ 7.38 (m, *J* = 8.4 Hz, 2H), 6.89 (m, *J* = 6.3 Hz, 4H), 6.16 (m, *J* = 9.9 Hz, 2H), 3.79 (s, 3H), 3.43 (s, 1H); <sup>13</sup>C NMR (101 MHz, CDCl<sub>3</sub>) δ 186.24, 159.62, 151.70 (2C), 130.66, 126.66 (2C), 126.33 (2C), 114.34 (2C), 70.63, 55.37. HRMS (EI-TOF, m/z) calcd for C<sub>13</sub>H<sub>12</sub>O<sub>3</sub> [M]<sup>+</sup> 216.0786, found 216.0787.

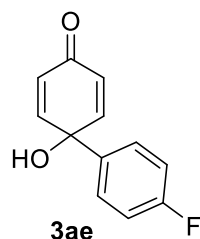

#### 4'-fluoro-1-hydroxy-[1,1'-biphenyl]-4(*1H*)-one

**3ae** was synthesized following the general procedure for 1,2-addition. After purification by preparative thin-layer chromatography using CH<sub>2</sub>Cl<sub>2</sub>/EtOAc (9/1) as the eluent, **3ae** was obtained in 88% yield (179.7 mg) as a white solid.

**3ae**: m.p. 125.4-126.0 °C; <sup>1</sup>H NMR (400 MHz, CDCl<sub>3</sub>) δ 7.48 – 7.42 (m, 2H), 7.09 – 7.02 (m, 2H), 6.92 – 6.86 (m, 2H), 6.22 – 6.14 (m, 2H), 3.55 (s, 1H); <sup>13</sup>C NMR (101 MHz, CDCl<sub>3</sub>) δ 186.00, 162.65 (d, *J*<sub>CF</sub> = 247.6 Hz), 151.26 (2C), 134.45 (*J*<sub>CF</sub>, *J* = 3.1 Hz), 127.25 (d, *J*<sub>CF</sub> = 8.3 Hz, 2C), 126.66 (2C), 115.82 (d, *J*<sub>CF</sub> = 21.7 Hz, 2C), 70.56. HRMS (EI-TOF, m/z) calcd for C<sub>12</sub>H<sub>9</sub>FO<sub>2</sub> [M]<sup>+</sup> 204.0587, found 204.0589.

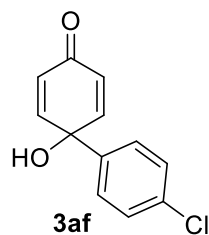

#### 4'-chloro-1-hydroxy-[1,1'-biphenyl]-4(*1H*)-one

**3af** was synthesized following the general procedure for 1,2-addition. After purification by preparative thin-layer chromatography using CH<sub>2</sub>Cl<sub>2</sub>/EtOAc (9/1) as the eluent, **3af** was obtained in 83% yield (183.1 mg) as a white solid.

**3af**: m.p. 169.8-170.4 °C; <sup>1</sup>H NMR (400 MHz, CDCl<sub>3</sub>) δ 7.45 – 7.39 (m, 2H), 7.39 – 7.31 (m, 2H), 6.90 – 6.82 (m, 2H), 6.29 – 6.19 (m, 2H), 2.67 (s, 1H); <sup>13</sup>C NMR (101 MHz, CDCl<sub>3</sub>) δ 185.44, 150.31 (2C), 137.21, 134.43, 129.09 (2C), 127.13 (2C), 126.81 (2C), 70.67. HRMS (EI-TOF, m/z) calcd for C<sub>12</sub>H<sub>9</sub><sup>35</sup>ClO<sub>2</sub> [M]<sup>+</sup> 220.0291, found 220.0294; calcd for C<sub>12</sub>H<sub>9</sub><sup>37</sup>ClO<sub>2</sub> [M]<sup>+</sup> 222.0262, found 220.0264.

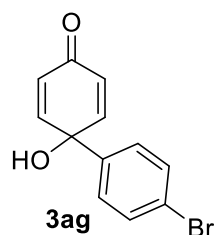

#### 4'-bromo-1-hydroxy-[1,1'-biphenyl]-4(*1H*)-one

**3ag** was synthesized following the general procedure for 1,2-addition. After purification by preparative thin-layer chromatography using CH<sub>2</sub>Cl<sub>2</sub>/EtOAc (9/1) as the eluent, **3ag** was obtained in 82% yield (217.4 mg) as a white solid.

**3ag**: m.p. 176.3-177.5 °C; <sup>1</sup>H NMR (400 MHz, DMSO-*d*<sub>6</sub>) δ 7.61 – 7.55 (m, 2H), 7.40 – 7.33 (m, 2H), 6.94 – 6.88 (m, 2H), 6.64 (s, 1H), 6.21 – 6.12 (m, 2H); <sup>13</sup>C NMR (101 MHz, DMSO-*d*<sub>6</sub>) δ 185.32, 152.03 (2C), 139.82, 131.49 (2C), 127.70 (2C), 125.77 (2C), 120.97, 69.75. HRMS (EI-TOF, m/z) calcd for C<sub>12</sub>H<sub>9</sub><sup>79</sup>BrO<sub>2</sub> [M]<sup>+</sup> 263.9786, found 263.9791; calcd for C<sub>12</sub>H<sub>9</sub><sup>81</sup>BrO<sub>2</sub> [M]<sup>+</sup> 265.9765, found 265.9764.

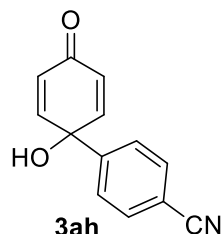

#### 1'-hydroxy-4'-oxo-1',4'-dihydro-[1,1'-biphenyl]-4-carbonitrile

**3ah** was synthesized following the general procedure for 1,2-addition. After purification by preparative thin-layer chromatography using CH<sub>2</sub>Cl<sub>2</sub>/EtOAc (8/1) as the eluent, **3ah** was obtained in 86% yield (181.6 mg) as a white solid.

**3ah**: m.p. 166.8-167.5 °C; <sup>1</sup>H NMR (400 MHz, DMSO-*d*<sub>6</sub>) δ 7.85 (d, *J* = 8.4 Hz, 2H), 7.61 (d, *J* = 8.4 Hz, 2H), 6.92 (d, *J* = 10.0 Hz, 2H), 6.80 (s, 1H), 6.20 (d, *J* = 10.0 Hz, 2H); <sup>13</sup>C NMR (101 MHz, DMSO-*d*<sub>6</sub>) δ 185.17, 151.38 (2C), 145.92, 132.63 (2C), 126.51 (2C), 126.26 (2C), 118.57, 110.57, 69.99. HRMS (EI-TOF, m/z) calcd for C<sub>13</sub>H<sub>9</sub>NO<sub>2</sub> [M]<sup>+</sup> 211.0633, found 211.0634.

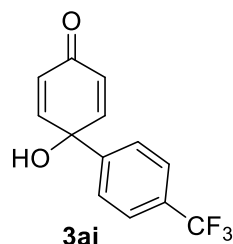

### 1-hydroxy-4'-(trifluoromethyl)-[1,1'-biphenyl]-4(*IH*)-one

**3ai** was synthesized following the general procedure for 1,2-addition. After purification by preparative thin-layer chromatography using CH<sub>2</sub>Cl<sub>2</sub>/EtOAc (9/1) as the eluent, **3ai** was obtained in 85% yield (216.1 mg) as a white solid.

**3ai**: m.p. 129.7-130.2 °C; <sup>1</sup>H NMR (400 MHz, CDCl<sub>3</sub>) δ 7.63 (q, *J* = 8.6 Hz, 4H), 6.91 – 6.83 (m, 2H), 6.33 – 6.23 (m, 2H), 2.73 (s, 1H); <sup>13</sup>C NMR (101 MHz, CDCl<sub>3</sub>) δ 185.72, 150.51 (2C), 142.70 (d, *J*<sub>CF</sub> = 1.1 Hz, 2C), 130.63 (q, *J*<sub>CF</sub> = 32.4 Hz), 127.20 (2C), 125.88, 125.87 (q, *J*<sub>CF</sub> = 3.9 Hz, 2C), 123.89 (q, *J*<sub>CF</sub> = 272.1 Hz), 70.78. HRMS (EI-TOF, *m/z*) calcd for C<sub>13</sub>H<sub>9</sub>F<sub>3</sub>O<sub>2</sub> [M]<sup>+</sup> 254.0555, found 254.0552.

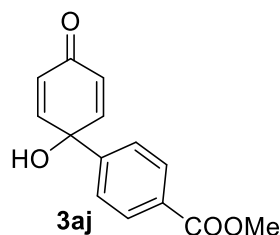

### methyl 1'-hydroxy-4'-oxo-1',4'-dihydro-[1,1'-biphenyl]-4-carboxylate

**3aj** was synthesized following the general procedure for 1,2-addition. After purification by preparative thin-layer chromatography using CH<sub>2</sub>Cl<sub>2</sub>/EtOAc (8/1) as the eluent, **3aj** was obtained in 82% yield (200.3 mg) as a white solid.

**3aj**: m.p. 164.8-165.2 °C; <sup>1</sup>H NMR (400 MHz, CDCl<sub>3</sub>) δ 8.03 (d, *J* = 8.4 Hz, 2H), 7.56 (d, *J* = 8.4 Hz, 2H), 6.88 (d, *J* = 10.0 Hz, 2H), 6.25 (d, *J* = 10.0 Hz, 2H), 3.92 (s, 3H), 3.23 (s, 1H); <sup>13</sup>C NMR (101 MHz, CDCl<sub>3</sub>) δ 185.62, 166.70, 150.36 (2C), 143.76, 130.18 (2C), 130.10, 127.20 (2C), 125.47 (2C), 70.96, 52.30. HRMS (EI-TOF, *m/z*) calcd for C<sub>14</sub>H<sub>12</sub>O<sub>4</sub> [M]<sup>+</sup> 244.0736, found 244.0735.

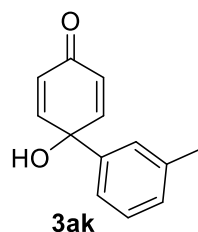

### 1-hydroxy-3'-methyl-[1,1'-biphenyl]-4(*IH*)-one

**3ak** was synthesized following the general procedure for 1,2-addition. After purification by preparative thin-layer chromatography using CH<sub>2</sub>Cl<sub>2</sub>/EtOAc (8/1) as the eluent, **3ak** was obtained in 73% yield (146.2 mg) as a white solid.

**3ak**: m.p. 87.6-88.5 °C; <sup>1</sup>H NMR (400 MHz, CDCl<sub>3</sub>) δ 7.30 – 7.25 (m, 3H), 7.16 – 7.10 (m, 1H), 6.93 – 6.86 (m, 2H), 6.23 – 6.17 (m, 2H), 3.16 (s, 1H), 2.35 (s, 3H); <sup>13</sup>C NMR (101 MHz, CDCl<sub>3</sub>) δ 186.15, 151.34 (2C), 138.77, 138.65, 129.17, 128.87, 126.65 (2C), 125.87, 122.34, 70.97, 21.53. HRMS (EI-TOF, *m/z*) calcd for C<sub>13</sub>H<sub>12</sub>O<sub>2</sub> [M]<sup>+</sup> 200.0837, found 200.0836.



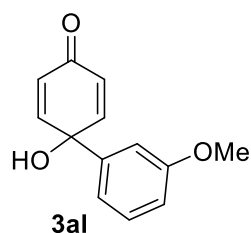

#### 1-hydroxy-3'-methoxy-[1,1'-biphenyl]-4(1H)-one

**3al** was synthesized following the general procedure for 1,2-addition. After purification by preparative thin-layer chromatography using CH<sub>2</sub>Cl<sub>2</sub>/EtOAc (7/1) as the eluent, **3al** was obtained in 75% yield (162.2 mg) as a white solid.

**3al**: m.p. 103.6-104.9 °C; <sup>1</sup>H NMR (400 MHz, CDCl<sub>3</sub>) δ 7.28 (t, *J* = 8.0 Hz, 1H), 7.08 – 7.05 (m, 1H), 7.03 – 6.99 (m, 1H), 6.92 – 6.87 (m, 2H), 6.22 – 6.16 (m, 2H), 3.80 (s, 3H), 3.27 (s, 1H); <sup>13</sup>C NMR (101 MHz, CDCl<sub>3</sub>) δ 186.06, 160.09, 151.08 (2C), 140.43, 129.99, 126.73 (2C), 117.59, 113.75, 111.13, 70.87, 55.36. HRMS (EI-TOF, *m/z*) calcd for C<sub>13</sub>H<sub>12</sub>O<sub>3</sub> [M]<sup>+</sup> 216.0786, found 216.0785.

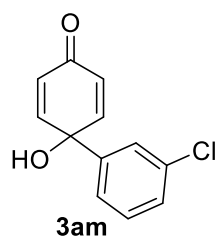

#### 3'-chloro-1-hydroxy-[1,1'-biphenyl]-4(1H)-one

**3am** was synthesized following the general procedure for 1,2-addition. After purification by preparative thin-layer chromatography using CH<sub>2</sub>Cl<sub>2</sub>/EtOAc (8/1) as the eluent, **3am** was obtained in 80% yield (176.5 mg) as a white solid.

**3am**: m.p. 79.8-81.5 °C; <sup>1</sup>H NMR (400 MHz, CDCl<sub>3</sub>) δ 7.51 (dd, *J* = 2.7, 1.4 Hz, 1H), 7.34 – 7.27 (m, 3H), 6.91 – 6.85 (m, 2H), 6.24 – 6.16 (m, 2H), 3.86 (s, 1H); <sup>13</sup>C NMR (101 MHz, CDCl<sub>3</sub>) δ 186.09, 151.03 (2C), 140.85, 134.94, 130.18, 128.56, 126.88 (2C), 125.69, 123.60, 70.59. HRMS (EI-TOF, *m/z*) calcd for C<sub>12</sub>H<sub>9</sub><sup>35</sup>ClO<sub>2</sub> [M]<sup>+</sup> 220.0291, found 220.0288; calcd for C<sub>12</sub>H<sub>9</sub><sup>37</sup>ClO<sub>2</sub> [M]<sup>+</sup> 222.0262, found 220.0267.

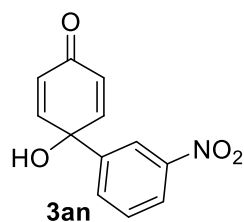

#### 1-hydroxy-3'-nitro-[1,1'-biphenyl]-4(1H)-one

**3an** was synthesized following the general procedure for 1,2-addition. After purification by preparative thin-layer chromatography using CH<sub>2</sub>Cl<sub>2</sub>/EtOAc (6/1) as the eluent, **3an** was obtained in 83% yield (191.9 mg) as a white solid.

**3an**: m.p. 115.6-116.8 °C; <sup>1</sup>H NMR (400 MHz, DMSO-*d*<sub>6</sub>) δ 8.30 (t, *J* = 1.9 Hz, 1H), 8.22 – 8.16 (m, 1H), 7.82 – 7.77 (m, 1H), 7.69 (t, *J* = 8.0 Hz, 1H), 6.99 – 6.95 (m, 2H), 6.94 (s, 1H), 6.26 – 6.20 (m, 2H); <sup>13</sup>C NMR (101 MHz, DMSO-*d*<sub>6</sub>) δ 185.15, 151.37 (2C), 148.04,

142.87, 132.26, 130.31, 126.35 (2C), 122.82, 120.03, 69.67. HRMS (EI-TOF, m/z) calcd for  $C_{12}H_9NO_4$   $[M]^+$  231.0532, found 231.0530.

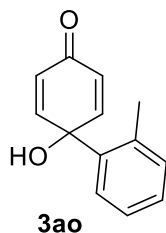

#### 1-hydroxy-2'-methyl-[1,1'-biphenyl]-4(1H)-one

**3ao** was synthesized following the general procedure for 1,2-addition. After purification by preparative thin-layer chromatography using  $CH_2Cl_2/EtOAc$  (8/1) as the eluent, **3ao** was obtained in 60% yield (120.1 mg) as a white solid.

**3ao**: m.p. 65.7-66.3 °C;  $^1H$  NMR (400 MHz,  $CDCl_3$ )  $\delta$  7.77 – 7.71 (m, 1H), 7.29 – 7.24 (m, 2H), 7.13 (dd,  $J$  = 5.8, 3.2 Hz, 1H), 6.94 – 6.89 (m, 2H), 6.29 – 6.21 (m, 2H), 2.98 (s, 1H), 2.33 (s, 3H);  $^{13}C$  NMR (101 MHz,  $CDCl_3$ )  $\delta$  185.98, 150.24 (2C), 136.48, 135.71, 132.37, 128.63, 127.50 (2C), 126.70, 125.94, 70.26, 20.54. HRMS (EI-TOF, m/z) calcd for  $C_{13}H_{12}O_2$   $[M]^+$  200.0837, found 200.0839.

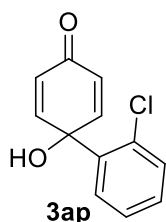

#### 2'-chloro-1-hydroxy-[1,1'-biphenyl]-4(1H)-one

**3ap** was synthesized following the general procedure for 1,2-addition. After purification by preparative thin-layer chromatography using  $CH_2Cl_2/EtOAc$  (8/1) as the eluent, **3ap** was obtained in 65% yield (143.4 mg) as a white solid.

**3ap**: m.p. 99.2-110.4 °C;  $^1H$  NMR (400 MHz,  $CDCl_3$ )  $\delta$  7.87 (dd,  $J$  = 5.6, 4.2 Hz, 1H), 7.39 – 7.27 (m, 3H), 6.94 – 6.86 (m, 2H), 6.32 (dd,  $J$  = 7.1, 5.9 Hz, 2H), 3.11 (s, 1H);  $^{13}C$  NMR (101 MHz,  $CDCl_3$ )  $\delta$  185.79, 148.24 (2C), 136.17, 131.91, 131.33, 129.96, 128.52 (2C), 127.85, 127.54, 69.60. HRMS (EI-TOF, m/z) calcd for  $C_{12}H_9^{35}ClO_2$   $[M]^+$  220.0291, found 220.0292; calcd for  $C_{12}H_9^{37}ClO_2$   $[M]^+$  222.0262, found 220.0265.

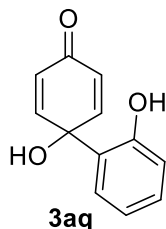

#### 1,2'-dihydroxy-[1,1'-biphenyl]-4(1H)-one

**3aq** was synthesized following the general procedure for 1,2-addition. After purification by preparative thin-layer chromatography using  $CH_2Cl_2/EtOAc$  (7/1) as the eluent, **3aq** was obtained in 54% yield (109.2 mg) as a white solid.

**3aq**: m.p. 98.3-99.7 °C;  $^1H$  NMR (400 MHz,  $DMSO-d_6$ )  $\delta$  9.34 (s, 1H), 9.15 (s, 1H), 6.96 – 6.91 (m, 2H), 6.80 – 6.70 (m, 6H);  $^{13}C$  NMR (101 MHz,  $DMSO-d_6$ )  $\delta$  152.69, 149.67, 148.59,

144.62, 124.02, 119.78, 119.36, 118.51 (2C), 116.98, 115.83 (2C). HRMS (EI-TOF, m/z) calcd for C<sub>12</sub>H<sub>10</sub>O<sub>3</sub> [M]<sup>+</sup> 202.0630, found 202.0629.

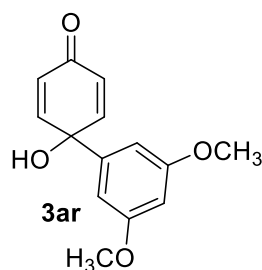

#### 1-hydroxy-3',5'-dimethoxy-[1,1'-biphenyl]-4(*1H*)-one

**3ar** was synthesized following the general procedure for 1,2-addition. After purification by preparative thin-layer chromatography using CH<sub>2</sub>Cl<sub>2</sub>/EtOAc (6/1) as the eluent, **3ar** was obtained in 68% yield (167.5 mg) as a white solid.

**3ar**: m.p. 116.8-117.7 °C; <sup>1</sup>H NMR (400 MHz, CDCl<sub>3</sub>) δ 6.92 – 6.87 (m, 2H), 6.63 (d, *J* = 2.2 Hz, 2H), 6.41 (t, *J* = 2.2 Hz, 1H), 6.22 – 6.16 (m, 2H), 3.78 (s, 6H), 3.49 (s, 1H); <sup>13</sup>C NMR (101 MHz, CDCl<sub>3</sub>) δ 186.19, 161.22 (2C), 151.10 (2C), 141.35, 126.67 (2C), 103.47 (2C), 100.19, 70.87, 55.45 (2C). HRMS (EI-TOF, m/z) calcd for C<sub>14</sub>H<sub>14</sub>O<sub>4</sub> [M]<sup>+</sup> 246.0892, found 246.0891.

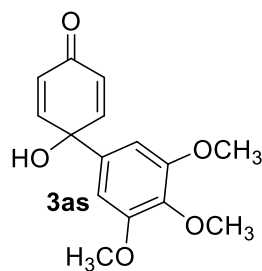

#### 1-hydroxy-3',4',5'-trimethoxy-[1,1'-biphenyl]-4(*1H*)-one

**3as** was synthesized following the general procedure for 1,2-addition. After purification by preparative thin-layer chromatography using CH<sub>2</sub>Cl<sub>2</sub>/EtOAc (6/1) as the eluent, **3as** was obtained in 63% yield (174.1 mg) as a white solid.

**3as**: m.p. 138.3-139.5 °C; <sup>1</sup>H NMR (400 MHz, CDCl<sub>3</sub>) δ 6.93 – 6.88 (m, 2H), 6.67 (s, 2H), 6.21 – 6.15 (m, 2H), 3.83 (s, 6H), 3.82 (s, 3H), 3.61 (s, 1H); <sup>13</sup>C NMR (101 MHz, CDCl<sub>3</sub>) δ 186.04, 153.49 (2C), 151.10 (2C), 137.73, 134.55, 126.57 (2C), 102.39 (2C), 70.74, 60.82, 56.16 (2C). HRMS (EI-TOF, m/z) calcd for C<sub>15</sub>H<sub>16</sub>O<sub>5</sub> [M]<sup>+</sup> 276.0998, found 276.0999.

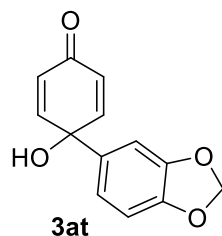

#### 4-(benzo[*d*][1,3]dioxol-5-yl)-4-hydroxycyclohexa-2,5-dien-1-one

**3at** was synthesized following the general procedure for 1,2-addition. After purification by preparative thin-layer chromatography using CH<sub>2</sub>Cl<sub>2</sub>/EtOAc (7/1) as the eluent, **3at** was obtained in 66% yield (151.9 mg) as a white solid.

**3at**: m.p. 140.6-142.1 °C; <sup>1</sup>H NMR (400 MHz, CDCl<sub>3</sub>) δ 6.97 (d, *J* = 1.7 Hz, 1H), 6.95 (dd, *J* = 8.1, 1.8 Hz, 1H), 6.90 – 6.83 (m, 2H), 6.79 (d, *J* = 8.1 Hz, 1H), 6.24 – 6.16 (m, 2H), 5.97 (s, 2H), 2.54 (s, 1H); <sup>13</sup>C NMR (101 MHz, CDCl<sub>3</sub>) δ 185.61, 150.66 (2C), 148.23, 147.74, 132.60, 126.77 (2C), 118.82, 108.54, 106.03, 101.38, 70.74. HRMS (EI-TOF, *m/z*) calcd for C<sub>13</sub>H<sub>10</sub>O<sub>4</sub> [M]<sup>+</sup> 230.0579, found 230.0580.

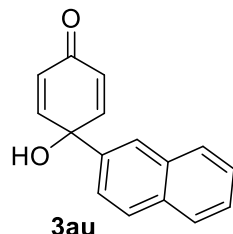

#### 4-hydroxy-4-(naphthalen-2-yl)cyclohexa-2,5-dien-1-one

**3au** was synthesized following the general procedure for 1,2-addition. After purification by preparative thin-layer chromatography using CH<sub>2</sub>Cl<sub>2</sub>/EtOAc (9/1) as the eluent, **3au** was obtained in 70% yield (165.4 mg) as a white solid.

**3au**: m.p. 131.9-132.7 °C; <sup>1</sup>H NMR (400 MHz, CDCl<sub>3</sub>) δ 8.03 (d, *J* = 1.3 Hz, 1H), 7.87 – 7.81 (m, 3H), 7.54 – 7.48 (m, 2H), 7.46 (dd, *J* = 8.7, 1.9 Hz, 1H), 6.99 – 6.93 (m, 2H), 6.30 – 6.23 (m, 2H), 2.96 (s, 1H); <sup>13</sup>C NMR (101 MHz, CDCl<sub>3</sub>) δ 185.92, 150.93 (2C), 135.88, 133.39, 133.07, 128.79, 128.20, 127.68, 127.06 (2C), 126.63, 126.58, 124.43, 122.97, 71.21. HRMS (EI-TOF, *m/z*) calcd for C<sub>16</sub>H<sub>12</sub>O<sub>2</sub> [M]<sup>+</sup> 236.0837, found 236.0834.

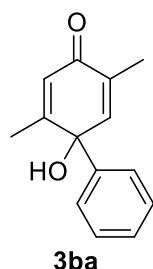

#### 1-hydroxy-2,5-dimethyl-[1,1'-biphenyl]-4(1H)-one

**3ba** was synthesized following the general procedure for 1,2-addition. After purification by preparative thin-layer chromatography using CH<sub>2</sub>Cl<sub>2</sub>/EtOAc (8/1) as the eluent, **3ba** was obtained in 90% yield (192.8 mg) as a white solid.

**3ba**: m.p. 118.1-119.3 °C; <sup>1</sup>H NMR (400 MHz, CDCl<sub>3</sub>) δ 7.40 (dt, *J* = 3.2, 1.8 Hz, 2H), 7.38 – 7.32 (m, 2H), 7.31 – 7.26 (m, 1H), 6.61 (d, *J* = 1.4 Hz, 1H), 6.09 (d, *J* = 1.3 Hz, 1H), 3.16 (s, 1H), 1.85 (d, *J* = 1.4 Hz, 3H), 1.81 (d, *J* = 1.3 Hz, 3H); <sup>13</sup>C NMR (101 MHz, CDCl<sub>3</sub>) δ 187.53, 161.65, 147.93, 139.35, 132.17, 128.71 (2C), 127.82, 126.17, 125.21 (2C), 73.51, 18.28, 15.18. HRMS (EI-TOF, *m/z*) calcd for C<sub>14</sub>H<sub>14</sub>O<sub>2</sub> [M]<sup>+</sup> 214.0994, found 214.0993.

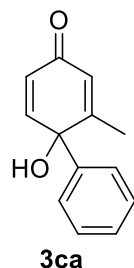

#### 1-hydroxy-2-methyl-[1,1'-biphenyl]-4(1H)-one

**3ca** was synthesized following the general procedure for 1,2-addition. After purification by preparative thin-layer chromatography using CH<sub>2</sub>Cl<sub>2</sub>/EtOAc (8/1) as the eluent, **3ca** was obtained in 91% yield (182.2 mg) as a white solid.

**3ca**: m.p. 112.5-113.6 °C; <sup>1</sup>H NMR (400 MHz, CDCl<sub>3</sub>) δ 7.44 (d, *J* = 7.2 Hz, 2H), 7.38 (t, *J* = 7.4 Hz, 2H), 7.32 (t, *J* = 7.0 Hz, 1H), 6.86 (d, *J* = 9.7 Hz, 1H), 6.18 – 6.09 (m, 2H), 3.41 (s, 1H), 1.85 (s, 3H); <sup>13</sup>C NMR (101 MHz, CDCl<sub>3</sub>) δ 187.01, 162.20, 152.34, 138.55, 128.80 (2C), 128.04, 126.20, 125.61, 125.23 (2C), 73.23, 18.56. HRMS (EI-TOF, *m/z*) calcd for C<sub>13</sub>H<sub>12</sub>O<sub>2</sub> [M]<sup>+</sup> 200.0837, found 200.0838.

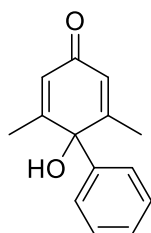

**3da**

#### 1-hydroxy-2,6-dimethyl-[1,1'-biphenyl]-4(*1H*)-one

**3da** was synthesized following the general procedure for 1,2-addition. After purification by preparative thin-layer chromatography using CH<sub>2</sub>Cl<sub>2</sub>/EtOAc (8/1) as the eluent, **3da** was obtained in 88% yield (188.6 mg) as a white solid.

**3da**: m.p. 115.9-116.7 °C; <sup>1</sup>H NMR (400 MHz, CDCl<sub>3</sub>) δ 7.41 (d, *J* = 7.3 Hz, 2H), 7.36 (t, *J* = 7.5 Hz, 2H), 7.32 – 7.27 (m, 1H), 6.03 (s, 2H), 3.72 (s, 1H), 1.80 (s, 6H); <sup>13</sup>C NMR (101 MHz, CDCl<sub>3</sub>) δ 187.13, 163.32, 138.93, 128.60 (2C), 127.74, 125.54, 125.07 (2C), 75.35, 18.46 (2C). HRMS (EI-TOF, *m/z*) calcd for C<sub>14</sub>H<sub>14</sub>O<sub>2</sub> [M]<sup>+</sup> 214.0994, found 214.0997.

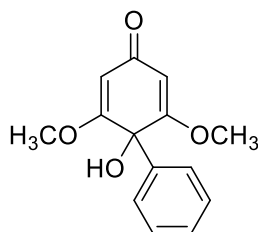

**3ea**

#### 1-hydroxy-2,6-dimethoxy-[1,1'-biphenyl]-4(*1H*)-one

**3ea** was synthesized following the general procedure for 1,2-addition. After purification by preparative thin-layer chromatography using CH<sub>2</sub>Cl<sub>2</sub>/EtOAc (7/1) as the eluent, **3ea** was obtained in 82% yield (201.9 mg) as a white solid.

**3ea**: m.p. 129.4-130.1 °C; <sup>1</sup>H NMR (400 MHz, CDCl<sub>3</sub>) δ 7.47 (d, *J* = 6.9 Hz, 2H), 7.39 – 7.29 (m, 3H), 5.52 (s, 2H), 3.66 (s, 6H), 3.60 (s, 1H); <sup>13</sup>C NMR (101 MHz, CDCl<sub>3</sub>) δ 187.74, 171.62, 139.33, 128.51 (2C), 128.32, 125.06 (2C), 100.48, 74.07, 56.54 (2C). HRMS (EI-TOF, *m/z*) calcd for C<sub>14</sub>H<sub>14</sub>O<sub>4</sub> [M]<sup>+</sup> 246.0892, found 246.0890.

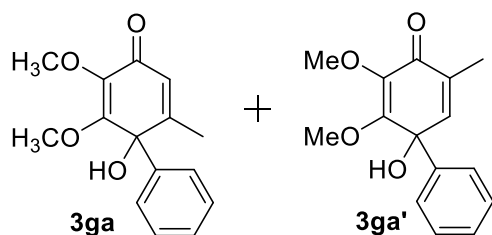

### 1-hydroxy-2,3-dimethoxy-6-methyl-[1,1'-biphenyl]-4(*1H*)-one (**3ga**)

### 1-hydroxy-2,3-dimethoxy-5-methyl-[1,1'-biphenyl]-4(*1H*)-one (**3ga'**)

**3ga** and **3ga'** was synthesized following the general procedure for 1,2-addition. After purification by preparative thin-layer chromatography using CH<sub>2</sub>Cl<sub>2</sub>/EtOAc (7/1) as the eluent. **3ga** was obtained in 72% yield (187.4 mg) as a white solid. **3ga'** was obtained in 19% yield (49.5 mg) as a white solid.

**3ga**: m.p. 133.5-134.6 °C; <sup>1</sup>H NMR (400 MHz, CDCl<sub>3</sub>) δ 7.45 – 7.41 (m, 2H), 7.38 – 7.33 (m, 2H), 7.32 – 7.27 (m, 1H), 5.96 (d, *J* = 1.4 Hz, 1H), 3.96 (s, 3H), 3.77 (s, 3H), 3.64 (s, 1H), 1.74 (d, *J* = 1.4 Hz, 3H); <sup>13</sup>C NMR (101 MHz, CDCl<sub>3</sub>) δ 184.54, 161.58, 156.47, 139.78, 135.84, 128.59 (2C), 128.03, 124.87 (2C), 124.51, 76.83, 61.02, 60.86, 17.14. HRMS (EI-TOF, *m/z*) calcd for C<sub>15</sub>H<sub>16</sub>O<sub>4</sub> [M]<sup>+</sup> 260.1049, found 260.1048.

**3ga'**: m.p. 136.1-136.9 °C; <sup>1</sup>H NMR (400 MHz, CDCl<sub>3</sub>) δ 7.43 (dt, *J* = 8.4, 2.6 Hz, 2H), 7.38 – 7.33 (m, 2H), 7.33 – 7.28 (m, 1H), 6.37 (d, *J* = 1.4 Hz, 1H), 4.05 (s, 3H), 3.80 (s, 3H), 3.11 (s, 1H), 1.86 (d, *J* = 1.4 Hz, 3H); <sup>13</sup>C NMR (101 MHz, CDCl<sub>3</sub>) δ 185.10, 159.85, 141.43, 140.74, 136.38, 131.42, 128.77 (2C), 128.17, 125.08 (2C), 74.36, 60.97, 60.83, 15.32. HRMS (EI-TOF, *m/z*) calcd for C<sub>15</sub>H<sub>16</sub>O<sub>4</sub> [M]<sup>+</sup> 260.1049, found 260.1048.

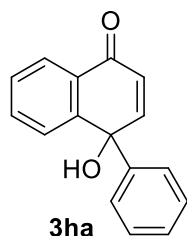

### 4-hydroxy-4-phenylnaphthalen-1(*4H*)-one

**3ha** was synthesized following the general procedure for 1,2-addition. After purification by preparative thin-layer chromatography using CH<sub>2</sub>Cl<sub>2</sub>/EtOAc (7/1) as the eluent, **3ha** was obtained in 48% yield (113.4 mg) as a white solid.

**3ha**: m.p. 124.5-125.3 °C; <sup>1</sup>H NMR (400 MHz, CDCl<sub>3</sub>) δ 8.10 (dd, *J* = 7.8, 1.1 Hz, 1H), 7.57 – 7.52 (m, 1H), 7.48 – 7.38 (m, 4H), 7.36 – 7.30 (m, 2H), 7.30 – 7.25 (m, 1H), 6.97 (d, *J* = 10.1 Hz, 1H), 6.33 (d, *J* = 10.1 Hz, 1H), 3.05 (s, 1H); <sup>13</sup>C NMR (101 MHz, CDCl<sub>3</sub>) δ 184.94, 151.71, 146.81, 142.07, 133.59, 129.75, 128.62 (2C), 128.52, 128.27, 127.71, 126.29, 126.19, 125.65 (2C), 72.03. HRMS (EI-TOF, *m/z*) calcd for C<sub>16</sub>H<sub>12</sub>O<sub>2</sub> [M]<sup>+</sup> 236.0837, found 236.0836.

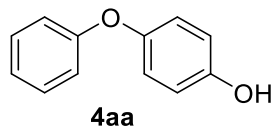

### 4-phenoxyphenol

**4aa** was synthesized following the general procedure for 1,6-addition. After purification by preparative thin-layer chromatography using PE/EtOAc (5/1) as the eluent, **4aa** was obtained in 88% yield (163.9 mg) as a white solid. **4aa** was obtained in 79% yield (147.1 mg) using Cu<sub>2</sub>O as a catalyst.

**4aa**: m.p. 83.4-84.6 °C; <sup>1</sup>H NMR (400 MHz, CDCl<sub>3</sub>) δ 7.34 – 7.26 (m, 2H), 7.07 – 7.01 (m, 1H), 6.99 – 6.89 (m, 4H), 6.85 – 6.77 (m, 2H), 4.89 (s, 1H); <sup>13</sup>C NMR (101 MHz, CDCl<sub>3</sub>) δ

158.43, 151.75, 150.23, 129.66 (2C), 122.54, 121.03 (2C), 117.64 (2C), 116.38 (2C). HRMS (EI-TOF, m/z) calcd for C<sub>12</sub>H<sub>10</sub>O<sub>2</sub> [M]<sup>+</sup> 186.0681, found 186.0680.

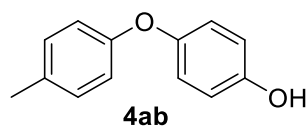

#### 4-(*p*-tolylloxy)phenol

**4ab** was synthesized following the general procedure for 1,6-addition. After purification by preparative thin-layer chromatography using PE/EtOAc (5/1) as the eluent, **4ab** was obtained in 75% yield (150.2 mg) as a white solid.

**4ab**: m.p. 88.6-89.3 °C; <sup>1</sup>H NMR (400 MHz, CDCl<sub>3</sub>) δ 7.09 (d, *J* = 8.2 Hz, 2H), 6.91 – 6.82 (m, 4H), 6.80 – 6.75 (m, 2H), 5.20 (s, 1H), 2.30 (s, 3H); <sup>13</sup>C NMR (101 MHz, CDCl<sub>3</sub>) δ 155.98, 151.45, 150.85, 132.22, 130.18 (2C), 120.54 (2C), 117.90 (2C), 116.36 (2C), 20.64. HRMS (EI-TOF, m/z) calcd for C<sub>13</sub>H<sub>12</sub>O<sub>2</sub> [M]<sup>+</sup> 200.0837, found 200.0838.

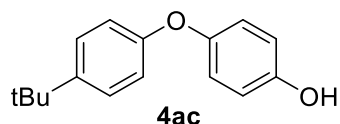

#### 4-(4-(*tert*-butyl)phenoxy)phenol

**4ac** was synthesized following the general procedure for 1,6-addition. After purification by preparative thin-layer chromatography using PE/EtOAc (4/1) as the eluent, **4ac** was obtained in 70% yield (169.6 mg) as a white solid.

**4ac**: m.p. 86.6-87.4 °C; <sup>1</sup>H NMR (400 MHz, CDCl<sub>3</sub>) δ 7.33 – 7.28 (m, 2H), 6.94 – 6.85 (m, 4H), 6.82 – 6.76 (m, 2H), 4.24 (s, 1H), 1.30 (s, 9H); <sup>13</sup>C NMR (101 MHz, CDCl<sub>3</sub>) δ 155.96, 151.55, 150.59, 145.44, 126.45 (2C), 120.80 (2C), 117.21 (2C), 116.31 (2C), 34.25, 31.52 (3C). HRMS (EI-TOF, m/z) calcd for C<sub>16</sub>H<sub>18</sub>O<sub>2</sub> [M]<sup>+</sup> 242.1307, found 242.1308.

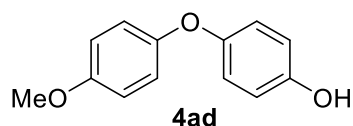

#### 4-(4-methoxyphenoxy)phenol

**4ad** was synthesized following the general procedure for 1,6-addition. After purification by preparative thin-layer chromatography using PE/EtOAc (4/1) as the eluent, **4ad** was obtained in 68% yield (147.0 mg) as a white solid. **4ad** was obtained in 61% yield (131.9 mg) using Cu<sub>2</sub>O as a catalyst.

**4ad**: m.p. 94.2-95.5 °C; <sup>1</sup>H NMR (400 MHz, CDCl<sub>3</sub>) δ 6.93 – 6.89 (m, 2H), 6.88 – 6.82 (m, 4H), 6.79 – 6.74 (m, 2H), 5.31 (s, 1H), 3.78 (s, 3H); <sup>13</sup>C NMR (101 MHz, CDCl<sub>3</sub>) δ 155.28, 151.63, 151.55, 151.27, 119.78 (2C), 119.58 (2C), 116.29 (2C), 114.89 (2C), 55.79. HRMS (EI-TOF, m/z) calcd for C<sub>13</sub>H<sub>12</sub>O<sub>3</sub> [M]<sup>+</sup> 216.0786, found 216.0788.

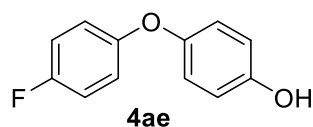

#### 4-(4-fluorophenoxy)phenol

**4ae** was synthesized following the general procedure. After purification by preparative thin-layer chromatography using PE/EtOAc (5/1) as the eluent, **4ae** was obtained in 95% yield (194.0 mg) as a white solid.

**4ae**: m.p. 97.9-98.7 °C; <sup>1</sup>H NMR (400 MHz, CDCl<sub>3</sub>) δ 7.00 – 6.95 (m, 2H), 6.93 – 6.86 (m, 4H), 6.84 – 6.75 (m, 2H), 5.08 (s, 1H); <sup>13</sup>C NMR (101 MHz, CDCl<sub>3</sub>) δ 158.42 (d, *J*<sub>CF</sub> = 240.7 Hz), 154.10 (d, *J*<sub>CF</sub> = 2.4 Hz), 151.60, 150.79, 120.46 (2C), 119.23 (d, *J*<sub>CF</sub> = 8.2 Hz, 2C), 116.47 (2C), 116.17 (d, *J*<sub>CF</sub> = 23.3 Hz, 2C). HRMS (EI-TOF, m/z) calcd for C<sub>12</sub>H<sub>9</sub>FO<sub>2</sub> [M]<sup>+</sup> 204.0587, found 204.0588.

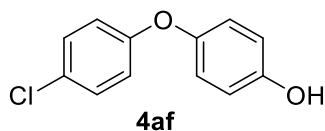

#### 4-(4-chlorophenoxy)phenol

**4af** was synthesized following the general procedure for 1,6-addition. After purification by preparative thin-layer chromatography using PE/EtOAc (5/1) as the eluent, **4af** was obtained in 92% yield (203.0 mg) as a white solid.

**4af**: m.p. 135-136.7 °C; <sup>1</sup>H NMR (400 MHz, CDCl<sub>3</sub>) δ 7.26 – 7.21 (m, 2H), 6.93 – 6.84 (m, 4H), 6.84 – 6.79 (m, 2H), 4.80 (s, 1H); <sup>13</sup>C NMR (101 MHz, CDCl<sub>3</sub>) δ 157.11, 152.00, 149.92, 129.59 (2C), 127.47, 121.03 (2C), 118.82 (2C), 116.49 (2C). HRMS (EI-TOF, m/z) calcd for C<sub>12</sub>H<sub>9</sub><sup>35</sup>ClO<sub>2</sub> [M]<sup>+</sup> 220.0291, found 220.0296; calcd for C<sub>12</sub>H<sub>9</sub><sup>37</sup>ClO<sub>2</sub> [M]<sup>+</sup> 222.0262, found 222.0264.

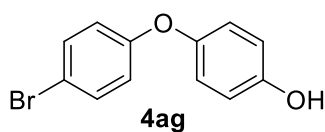

#### 4-(4-bromophenoxy)phenol

**4ag** was synthesized following the general procedure for 1,6-addition. After purification by preparative thin-layer chromatography using PE/EtOAc (5/1) as the eluent, **4ag** was obtained in 93% yield (246.5 mg) as a white solid.

**4ag**: m.p. 158.6-160.0 °C; <sup>1</sup>H NMR (400 MHz, CDCl<sub>3</sub>) δ 7.42 – 7.35 (m, 2H), 6.93 – 6.88 (m, 2H), 6.85 – 6.78 (m, 4H), 5.10 (s, 1H); <sup>13</sup>C NMR (101 MHz, CDCl<sub>3</sub>) δ 157.70, 152.06, 149.76, 132.54 (2C), 121.10 (2C), 119.24 (2C), 116.50 (2C), 114.83. HRMS (EI-TOF, m/z) calcd for C<sub>12</sub>H<sub>9</sub><sup>79</sup>BrO<sub>2</sub> [M]<sup>+</sup> 263.9786, found 263.9797; calcd for C<sub>12</sub>H<sub>9</sub><sup>81</sup>BrO<sub>2</sub> [M]<sup>+</sup> 265.9765, found 265.9771.

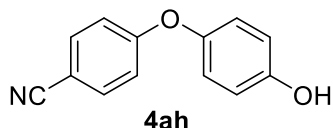

#### 4-(4-hydroxyphenoxy)benzonitrile

**4ah** was synthesized following the general procedure for 1,6-addition. After purification by preparative thin-layer chromatography using PE/EtOAc (4/1) as the eluent, **4ah** was obtained in 94% yield (198.5 mg) as a white solid.

**4ah**: m.p. 151.1-152.5 °C; <sup>1</sup>H NMR (400 MHz, DMSO-*d*<sub>6</sub>) δ 9.54 (s, 1H), 7.79 (d, *J* = 8.1 Hz, 2H), 6.99 (t, *J* = 8.5 Hz, 4H), 6.84 (d, *J* = 8.0 Hz, 2H); <sup>13</sup>C NMR (101 MHz, DMSO-*d*<sub>6</sub>)



$\delta$  162.31, 154.85, 145.89, 134.45 (2C), 121.80 (2C), 118.81, 116.89 (2C), 116.51 (2C), 104.12. HRMS (EI-TOF,  $m/z$ ) calcd for  $C_{13}H_9NO_2$   $[M]^+$  211.0633, found 211.0634.

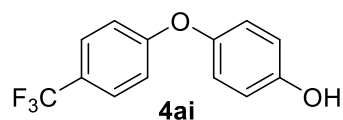

#### 4-(4-(trifluoromethyl)phenoxy)phenol

**4ai** was synthesized following the general procedure for 1,6-addition. After purification by preparative thin-layer chromatography using PE/EtOAc (5/1) as the eluent, **4ai** was obtained in 92% yield (233.9 mg) as a white solid. **4ai** was obtained in 91% yield (231.3 mg) using  $Cu_2O$  as a catalyst.

**4ai**: m.p. 112.2-113.8 °C;  $^1H$  NMR (400 MHz,  $CDCl_3$ )  $\delta$  7.54 (d,  $J$  = 8.6 Hz, 2H), 6.96 (dt,  $J$  = 5.9, 3.9 Hz, 4H), 6.89 – 6.81 (m, 2H), 4.67 (s, 1H);  $^{13}C$  NMR (101 MHz,  $CDCl_3$ )  $\delta$  161.42, 152.55, 148.83, 127.05 (q,  $J_{CF}$  = 3.7 Hz, 2c), 124.32 (q,  $J_{CF}$  = 32.9 Hz), 124.27 (q,  $J_{CF}$  = 271.4 Hz), 121.76 (2C), 116.86 (2C), 116.65 (2C). HRMS (EI-TOF,  $m/z$ ) calcd for  $C_{13}H_9F_3O_2$   $[M]^+$  254.0555, found 254.0556.

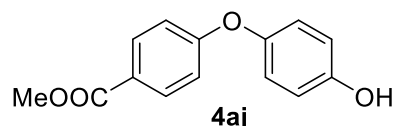

#### methyl 4-(4-hydroxyphenoxy)benzoate

**4aj** was synthesized following the general procedure for 1,6-addition. After purification by preparative thin-layer chromatography using PE/EtOAc (5/1) as the eluent, **4aj** was obtained in 83% yield (202.7 mg) as a white solid.

**4aj**: m.p. 141.3-142.7 °C;  $^1H$  NMR (400 MHz,  $DMSO-d_6$ )  $\delta$  9.48 (s, 1H), 7.93 (d,  $J$  = 8.8 Hz, 2H), 7.00 – 6.92 (m, 4H), 6.83 (d,  $J$  = 8.8 Hz, 2H), 3.82 (s, 3H);  $^{13}C$  NMR (101 MHz,  $DMSO-d_6$ )  $\delta$  165.69, 162.64, 154.63, 146.35, 131.41 (2C), 123.08, 121.73 (2C), 116.43 (2C), 116.01 (2C), 51.87. HRMS (EI-TOF,  $m/z$ ) calcd for  $C_{14}H_{12}O_4$   $[M]^+$  244.0736, found 244.0735.

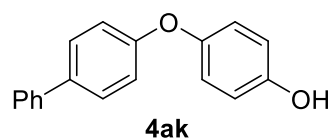

#### 4-([1,1'-biphenyl]-4-yloxy)phenol

**4ak** was synthesized following the general procedure for 1,6-addition. After purification by preparative thin-layer chromatography using PE/EtOAc (5/1) as the eluent, **4ak** was obtained in 82% yield (215.1 mg) as a white solid.

**4ak**: m.p. 173.5-174.2 °C;  $^1H$  NMR (400 MHz,  $CDCl_3$ )  $\delta$  7.58 – 7.48 (m, 4H), 7.41 (t,  $J$  = 7.6 Hz, 2H), 7.31 (t,  $J$  = 7.3 Hz, 1H), 7.06 – 6.93 (m, 4H), 6.90 – 6.74 (m, 2H), 4.85 (s, 1H);  $^{13}C$  NMR (101 MHz,  $CDCl_3$ )  $\delta$  158.04, 151.84, 150.19, 140.62, 135.62, 128.79 (2C), 128.35 (2C), 126.96, 126.88 (2C), 121.12 (2C), 117.83 (2C), 116.41 (2C). HRMS (EI-TOF,  $m/z$ ) calcd for  $C_{18}H_{14}O_2$   $[M]^+$  262.0994, found 262.0993.

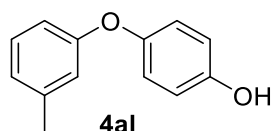

#### 4-(*m*-tolyloxy)phenol

**4al** was synthesized following the general procedure for 1,6-addition. After purification by preparative thin-layer chromatography using PE/EtOAc (5/1) as the eluent, **4al** was obtained in 80% yield (160.2 mg) as a white solid.

**4al**: m.p. 82.3-83.5 °C; <sup>1</sup>H NMR (400 MHz, CDCl<sub>3</sub>) δ 7.16 (t, *J* = 7.8 Hz, 1H), 6.93 – 6.89 (m, 2H), 6.85 (d, *J* = 7.5 Hz, 1H), 6.82 – 6.72 (m, 4H), 4.81 (s, 1H), 2.29 (s, 3H); <sup>13</sup>C NMR (101 MHz, CDCl<sub>3</sub>) δ 158.38, 151.65, 150.34, 139.88, 129.41, 123.44, 121.02 (2C), 118.37, 116.40 (2C), 114.71, 21.44. HRMS (EI-TOF, *m/z*) calcd for C<sub>13</sub>H<sub>12</sub>O<sub>2</sub> [M]<sup>+</sup> 200.0837, found 200.0838.

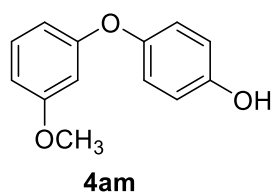

#### 4-(3-methoxyphenoxy)phenol

**4am** was synthesized following the general procedure for 1,6-addition. After purification by preparative thin-layer chromatography using PE/EtOAc (4/1) as the eluent, **4am** was obtained in 84% yield (181.6 mg) as a white solid.

**4am**: m.p. 88.5-89.3 °C; <sup>1</sup>H NMR (400 MHz, CDCl<sub>3</sub>) δ 7.20 – 7.14 (m, 1H), 6.95 – 6.89 (m, 2H), 6.82 – 6.76 (m, 2H), 6.60 (ddd, *J* = 8.3, 2.2, 0.8 Hz, 1H), 6.56 – 6.47 (m, 2H), 5.41 (s, 1H), 3.75 (s, 3H); <sup>13</sup>C NMR (101 MHz, CDCl<sub>3</sub>) δ 160.81, 159.74, 151.93, 149.87, 130.14, 121.24 (2C), 116.42 (2C), 109.91, 108.16, 103.79, 55.43. HRMS (EI-TOF, *m/z*) calcd for C<sub>13</sub>H<sub>12</sub>O<sub>3</sub> [M]<sup>+</sup> 216.0786, found 216.0785.

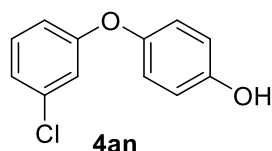

#### 4-(3-chlorophenoxy)phenol

**4an** was synthesized following the general procedure for 1,6-addition. After purification by preparative thin-layer chromatography using PE/EtOAc (5/1) as the eluent, **4an** was obtained in 86% yield (189.8 mg) as a white solid.

**4an**: m.p. 92.9-93.7 °C; <sup>1</sup>H NMR (400 MHz, CDCl<sub>3</sub>) δ 7.18 (t, *J* = 8.1 Hz, 1H), 7.00 (ddd, *J* = 8.0, 1.9, 0.9 Hz, 1H), 6.95 – 6.88 (m, 3H), 6.87 – 6.79 (m, 3H), 5.48 (s, 1H); <sup>13</sup>C NMR (101 MHz, CDCl<sub>3</sub>) δ 159.37, 152.14, 149.42, 135.01, 130.46, 122.63, 121.46 (2C), 117.66, 116.63 (2C), 115.67. HRMS (EI-TOF, *m/z*) calcd for C<sub>12</sub>H<sub>9</sub><sup>35</sup>ClO<sub>2</sub> [M]<sup>+</sup> 220.0291, found 220.0293; calcd for C<sub>12</sub>H<sub>9</sub><sup>37</sup>ClO<sub>2</sub> [M]<sup>+</sup> 222.0262, found 220.0261.

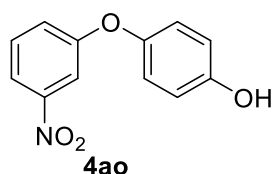

#### 4-(3-nitrophenoxy)phenol

**4ao** was synthesized following the general procedure for 1,6-addition. After purification by preparative thin-layer chromatography using PE/EtOAc (3/1) as the eluent, **4ao** was obtained in 89% yield (205.8 mg) as a white solid.

**4ao**: m.p. 123.9-125.0 °C; <sup>1</sup>H NMR (400 MHz, CDCl<sub>3</sub>) δ 7.88 (ddd, *J* = 8.2, 2.1, 0.9 Hz, 1H), 7.71 (t, *J* = 2.3 Hz, 1H), 7.45 (t, *J* = 8.2 Hz, 1H), 7.27 (ddd, *J* = 8.2, 2.4, 0.8 Hz, 1H), 6.99 – 6.94 (m, 2H), 6.92 – 6.87 (m, 2H), 5.15 (s, 1H); <sup>13</sup>C NMR (101 MHz, CDCl<sub>3</sub>) δ 159.54, 152.86, 149.19, 148.53, 130.27, 123.35, 121.66 (2C), 117.10, 116.88 (2C), 111.70. HRMS (EI-TOF, *m/z*) calcd for C<sub>12</sub>H<sub>9</sub>NO<sub>4</sub> [M]<sup>+</sup> 231.0532, found 231.0533.

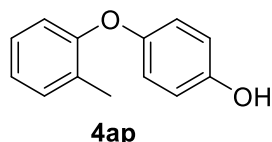

#### 4-(*o*-tolylloxy)phenol

**4ap** was synthesized following the general procedure for 1,6-addition. After purification by preparative thin-layer chromatography using PE/EtOAc (5/1) as the eluent, **4ap** was obtained in 65% yield (130.2 mg) as a white solid.

**4aq**: m.p. 58.6-59.5 °C; <sup>1</sup>H NMR (400 MHz, CDCl<sub>3</sub>) δ 7.23 – 7.19 (m, 1H), 7.13 – 7.08 (m, 1H), 6.99 (td, *J* = 7.4, 1.1 Hz, 1H), 6.87 – 6.72 (m, 5H), 5.16 (s, 1H), 2.26 (s, 3H); <sup>13</sup>C NMR (101 MHz, CDCl<sub>3</sub>) δ 155.71, 151.25, 151.02, 131.38, 129.17, 127.04, 123.25, 119.49 (2C), 118.18, 116.34 (2C), 16.25. HRMS (EI-TOF, *m/z*) calcd for C<sub>13</sub>H<sub>12</sub>O<sub>2</sub> [M]<sup>+</sup> 200.0837, found 200.0836.

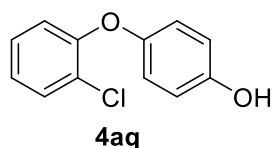

#### 4-(2-hydroxyphenoxy)phenol

**4aq** was synthesized following the general procedure for 1,6-addition. After purification by preparative thin-layer chromatography using PE/EtOAc (4/1) as the eluent, **4aq** was obtained in 73% yield (161.1 mg) as a white solid.

**4aq**: m.p. 66.4-67.9 °C; <sup>1</sup>H NMR (400 MHz, CDCl<sub>3</sub>) δ 7.42 (dd, *J* = 7.9, 1.6 Hz, 1H), 7.15 (ddd, *J* = 8.2, 7.5, 1.6 Hz, 1H), 7.01 (td, *J* = 7.7, 1.5 Hz, 1H), 6.91 – 6.78 (m, 5H), 5.38 (s, 1H); <sup>13</sup>C NMR (101 MHz, CDCl<sub>3</sub>) δ 153.66, 151.77, 150.13, 130.71, 127.86, 124.74, 123.89, 120.24 (2C), 119.12, 116.48 (2C). HRMS (EI-TOF, *m/z*) calcd for C<sub>12</sub>H<sub>9</sub><sup>35</sup>ClO<sub>2</sub> [M]<sup>+</sup> 220.0291, found 220.0294; calcd for C<sub>12</sub>H<sub>9</sub><sup>37</sup>ClO<sub>2</sub> [M]<sup>+</sup> 222.0262, found 220.0261.

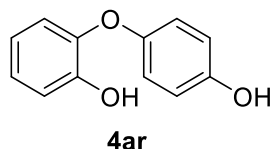

#### 2-(4-hydroxyphenoxy)phenol

**4ar** was synthesized following the general procedure for 1,6-addition. After purification by preparative thin-layer chromatography using PE/EtOAc (3/1) as the eluent, **4ar** was obtained in 65% yield (131.4 mg) as a white solid.

**4ar**: m.p. 70.3-71.8 °C; <sup>1</sup>H NMR (400 MHz, DMSO-*d*<sub>6</sub>) δ 9.33 (s, 1H), 9.14 (s, 1H), 6.95 – 6.89 (m, 2H), 6.80 – 6.70 (m, 6H); <sup>13</sup>C NMR (101 MHz, DMSO-*d*<sub>6</sub>) δ 152.69, 149.68, 148.59, 144.62, 124.02, 119.78, 119.37, 118.52 (2C), 116.98, 115.83 (2C). HRMS (EI-TOF, *m/z*) calcd for C<sub>12</sub>H<sub>10</sub>O<sub>3</sub> [M]<sup>+</sup> 202.0630, found 202.0631.

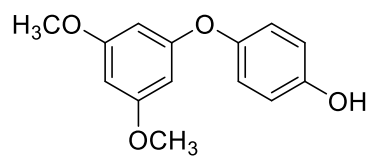

**4as**

#### 4-(3,5-dimethoxyphenoxy)phenol

**4as** was synthesized following the general procedure for 1,6-addition. After purification by preparative thin-layer chromatography using PE/EtOAc (3/1) as the eluent, **4as** was obtained in 83% yield (204.4 mg) as a white solid.

**4as**: m.p. 148.5-149.9 °C; <sup>1</sup>H NMR (400 MHz, CDCl<sub>3</sub>) δ 6.94 – 6.89 (m, 2H), 6.81 – 6.75 (m, 2H), 6.18 (t, *J* = 2.2 Hz, 1H), 6.11 (d, *J* = 2.2 Hz, 2H), 5.93 (s, 1H), 3.72 (s, 6H); <sup>13</sup>C NMR (101 MHz, CDCl<sub>3</sub>) δ 161.48 (2C), 160.57, 152.15, 149.47, 121.42 (2C), 116.43 (2C), 96.30 (2C), 94.82, 55.48 (2C). HRMS (EI-TOF, *m/z*) calcd for C<sub>14</sub>H<sub>14</sub>O<sub>4</sub> [M]<sup>+</sup> 246.0892, found 246.0893.

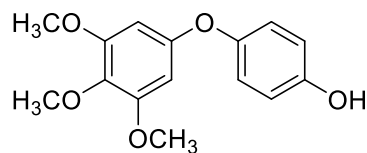

**4at**

#### 4-(3,4,5-trimethoxyphenoxy)phenol

**4at** was synthesized following the general procedure for 1,6-addition. After purification by preparative thin-layer chromatography using PE/EtOAc (3/1) as the eluent, **4at** was obtained in 78% yield (215.5 mg) as a white solid.

**4at**: m.p. 168.6-169.4 °C; <sup>1</sup>H NMR (400 MHz, DMSO-*d*<sub>6</sub>) δ 9.30 (s, 1H), 6.91 – 6.86 (m, 2H), 6.81 – 6.74 (m, 2H), 6.23 (s, 2H), 3.69 (s, 6H), 3.62 (s, 3H); <sup>13</sup>C NMR (101 MHz, DMSO-*d*<sub>6</sub>) δ 154.29, 153.56, 153.46 (2C), 148.26, 132.94, 120.32 (2C), 116.12 (2C), 95.30 (2C), 60.06, 55.78 (2C). HRMS (EI-TOF, *m/z*) calcd for C<sub>15</sub>H<sub>16</sub>O<sub>5</sub> [M]<sup>+</sup> 276.0998, found 276.0997.

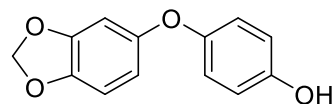

**4au**

#### 4-(benzo[*d*][1,3]dioxol-5-yloxy)phenol

**4au** was synthesized following the general procedure for 1,6-addition. After purification by preparative thin-layer chromatography using PE/EtOAc (3/1) as the eluent, **4au** was obtained in 80% yield (184.2 mg) as a white solid.

**4au**: m.p. 158.3-159.7 °C; <sup>1</sup>H NMR (400 MHz, CDCl<sub>3</sub>) δ 6.88 – 6.84 (m, 2H), 6.79 – 6.75 (m, 2H), 6.71 (d, *J* = 8.4 Hz, 1H), 6.52 (d, *J* = 2.4 Hz, 1H), 6.41 (dd, *J* = 8.4, 2.4 Hz, 1H), 5.93 (s, 2H), 5.40 (s, 1H); <sup>13</sup>C NMR (101 MHz, CDCl<sub>3</sub>) δ 152.88, 151.38, 151.27, 148.29,

143.19, 120.03 (2C), 116.33 (2C), 110.60, 108.23, 101.44, 101.13. HRMS (EI-TOF, m/z) calcd for C<sub>13</sub>H<sub>10</sub>O<sub>4</sub> [M]<sup>+</sup> 230.0579, found 230.0578.

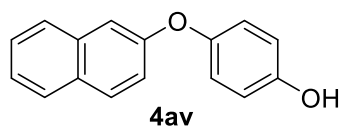

#### 4-(naphthalen-2-yloxy)phenol

**4av** was synthesized following the general procedure for 1,6-addition. After purification by preparative thin-layer chromatography using PE/EtOAc (4/1) as the eluent, **4av** was obtained in 82% yield (193.7 mg) as a white solid.

**4av**: m.p. 79.2-80.8 °C; <sup>1</sup>H NMR (400 MHz, CDCl<sub>3</sub>) δ 7.78 (d, *J* = 8.8 Hz, 2H), 7.64 (d, *J* = 8.1 Hz, 1H), 7.38 (dtd, *J* = 16.2, 6.9, 1.2 Hz, 2H), 7.23 (dd, *J* = 8.9, 2.5 Hz, 1H), 7.18 (d, *J* = 2.3 Hz, 1H), 7.01 – 6.95 (m, 2H), 6.85 – 6.79 (m, 2H), 5.08 (s, 1H); <sup>13</sup>C NMR (101 MHz, CDCl<sub>3</sub>) δ 156.36, 151.92, 150.20, 134.37, 129.87, 129.86, 127.76, 127.07, 126.57, 124.49, 121.27 (2C), 119.37, 116.52 (2C), 112.40. HRMS (EI-TOF, m/z) calcd for C<sub>16</sub>H<sub>12</sub>O<sub>2</sub> [M]<sup>+</sup> 236.0837, found 236.0838.

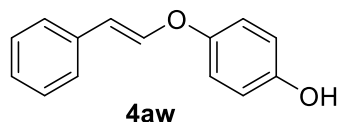

#### (*E*)-4-(styryloxy)phenol

**4aw** was synthesized following the general procedure for 1,6-addition. After purification by preparative thin-layer chromatography using PE/EtOAc (2/1) as the eluent, **4aw** was obtained in 63% yield (133.7 mg) as a white solid.

**4aw**: m.p. 55.4-56.1 °C; <sup>1</sup>H NMR (400 MHz, CDCl<sub>3</sub>) δ 7.30 – 7.27 (m, 4H), 7.18 (ddd, *J* = 5.4, 4.1, 2.3 Hz, 1H), 7.09 (d, *J* = 12.5 Hz, 1H), 6.96 – 6.92 (m, 2H), 6.81 – 6.77 (m, 2H), 6.24 (d, *J* = 12.5 Hz, 1H), 4.98 (s, 1H); <sup>13</sup>C NMR (101 MHz, CDCl<sub>3</sub>) δ 151.60, 151.08, 144.78, 135.32, 128.71 (2C), 126.52, 125.59 (2C), 118.66 (2C), 116.28 (2C), 112.49. HRMS (EI-TOF, m/z) calcd for C<sub>14</sub>H<sub>12</sub>O<sub>2</sub> [M]<sup>+</sup> 212.0837, found 212.0838.

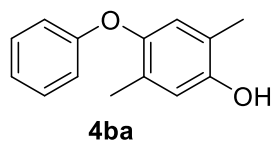

#### 2,5-dimethyl-4-phenoxyphenol

**4ba** was synthesized following the general procedure for 1,6-addition. After purification by preparative thin-layer chromatography using PE/EtOAc (5/1) as the eluent, **4ba** was obtained in 62% yield (132.8 mg) as a white solid. **4ba** was obtained in 58% yield (124.3 mg) using Cu<sub>2</sub>O as a catalyst.

**4ba**: m.p. 94.6-95.5 °C; <sup>1</sup>H NMR (400 MHz, CDCl<sub>3</sub>) δ 7.28 – 7.23 (m, 2H), 7.01 – 6.96 (m, 1H), 6.86 – 6.81 (m, 2H), 6.75 (s, 1H), 6.65 (s, 1H), 4.72 (s, 1H), 2.18 (s, 3H), 2.10 (s, 3H); <sup>13</sup>C NMR (101 MHz, CDCl<sub>3</sub>) δ 158.89, 150.35, 147.03, 129.56 (2C), 129.03, 123.35, 122.47, 121.64, 117.41, 116.12 (2C), 15.82, 15.49. HRMS (EI-TOF, m/z) calcd for C<sub>14</sub>H<sub>14</sub>O<sub>2</sub> [M]<sup>+</sup> 214.0994, found 214.0993.

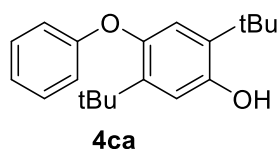

### 2,5-di-tert-butyl-4-phenoxyphenol

**4ca** was synthesized following the general procedure for 1,6-addition. After purification by preparative thin-layer chromatography using PE/EtOAc (4/1) as the eluent, **4ca** was obtained in 36% yield (107.4 mg) as a white solid.

**4ca**: m.p. 98.5-99.5 °C; <sup>1</sup>H NMR (400 MHz, CDCl<sub>3</sub>) δ 7.31 – 7.25 (m, 2H), 6.99 (dd, *J* = 10.6, 4.1 Hz, 1H), 6.90 (dt, *J* = 3.3, 1.8 Hz, 2H), 6.80 (s, 1H), 6.68 (s, 1H), 4.68 (s, 1H), 1.32 (s, 9H), 1.32 (s, 9H); <sup>13</sup>C NMR (101 MHz, CDCl<sub>3</sub>) δ 158.94, 149.85, 147.51, 140.06, 134.78, 129.50 (2C), 121.57, 120.75, 117.01 (2C), 115.40, 34.23, 34.17, 30.18 (3C), 29.54 (3C). HRMS (EI-TOF, *m/z*) calcd for C<sub>20</sub>H<sub>26</sub>O<sub>2</sub> [M]<sup>+</sup> 298.1933, found 298.1932.

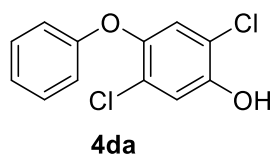

### 2,5-dichloro-4-phenoxyphenol

**4da** was synthesized following the general procedure for 1,6-addition. After purification by preparative thin-layer chromatography using PE/EtOAc (5/1) as the eluent, **4da** was obtained in 82% yield (209.2 mg) as a white solid. **4da** was obtained in 83% yield (211.7 mg) using Cu<sub>2</sub>O as a catalyst.

**4da**: m.p. 144.5-145.3 °C; <sup>1</sup>H NMR (400 MHz, CDCl<sub>3</sub>) δ 7.34 – 7.28 (m, 2H), 7.16 – 7.13 (m, 1H), 7.08 (t, *J* = 7.4 Hz, 1H), 7.04 (s, 1H), 6.94 – 6.89 (m, 2H), 5.55 (s, 1H); <sup>13</sup>C NMR (101 MHz, CDCl<sub>3</sub>) δ 157.37, 148.38, 145.73, 129.86 (2C), 126.16, 123.27, 121.77, 118.56, 117.78, 117.10 (2C). HRMS (EI-TOF, *m/z*) calcd for C<sub>12</sub>H<sub>8</sub><sup>35</sup>Cl<sub>2</sub>O<sub>2</sub> [M]<sup>+</sup> 253.9901, found 253.9899; calcd for C<sub>12</sub>H<sub>8</sub><sup>35</sup>Cl<sup>37</sup>ClO<sub>2</sub> [M]<sup>+</sup> 255.9872, found 255.9871; calcd for C<sub>12</sub>H<sub>8</sub><sup>37</sup>Cl<sub>2</sub>O<sub>2</sub> [M]<sup>+</sup> 257.9842, found 257.9841.

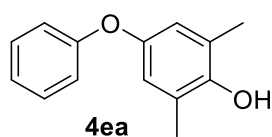

### 2,6-dimethyl-4-phenoxyphenol

**4ea** was synthesized following the general procedure for 1,6-addition. After purification by preparative thin-layer chromatography using PE/EtOAc (4/1) as the eluent, **4ea** was obtained in 63% yield (135.0 mg) as a white solid.

**4ea**: m.p. 89.5-90.7 °C; <sup>1</sup>H NMR (400 MHz, CDCl<sub>3</sub>) δ 7.24 (dd, *J* = 8.5, 7.5 Hz, 2H), 6.95 (t, *J* = 7.3 Hz, 1H), 6.80 – 6.71 (m, 2H), 6.56 (s, 2H), 4.86 (s, 1H), 2.06 (s, 6H); <sup>13</sup>C NMR (101 MHz, CDCl<sub>3</sub>) δ 158.16, 152.21, 144.81, 132.72, 129.62 (2C), 121.22, 115.31 (2C), 114.54 (2C), 16.45 (2C). HRMS (EI-TOF, *m/z*) calcd for C<sub>14</sub>H<sub>14</sub>O<sub>2</sub> [M]<sup>+</sup> 214.0994, found 214.0993.

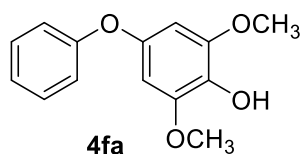

### 2,6-dimethoxy-4-phenoxyphenol

**4fa** was synthesized following the general procedure for 1,6-addition. After purification by preparative thin-layer chromatography using PE/EtOAc (3/1) as the eluent, **4fa** was obtained in 54% yield (133.0 mg) as a white solid.

**4fa**: m.p. 98.8-99.7 °C; <sup>1</sup>H NMR (400 MHz, CDCl<sub>3</sub>) δ 7.26 – 7.21 (m, 2H), 6.96 (t, *J* = 7.3 Hz, 1H), 6.86 (dt, *J* = 3.4, 1.8 Hz, 2H), 6.15 (s, 2H), 5.26 (s, 1H), 3.69 (s, 6H); <sup>13</sup>C NMR (101 MHz, CDCl<sub>3</sub>) δ 158.69, 153.88 (2C), 153.70, 129.28 (2C), 125.82, 121.49, 114.66 (2C), 93.24 (2C), 56.16 (2C). HRMS (EI-TOF, *m/z*) calcd for C<sub>14</sub>H<sub>14</sub>O<sub>4</sub> [M]<sup>+</sup> 246.0892, found 246.0893.

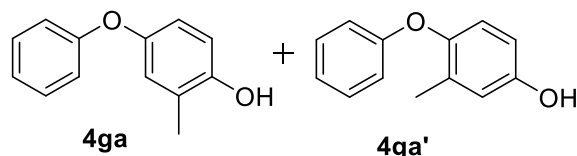

### 2-methyl-4-phenoxyphenol (**4ga**)

### 3-methyl-4-phenoxyphenol (**4ga'**)

**4ga** and **4ga'** was synthesized following the general procedure for 1,6-addition. After purification by preparative thin-layer chromatography using PE/EtOAc (4/1) as the eluent. **4ga** was obtained in 49% yield (98.1 mg) as a white solid. **4ga'** was obtained in 19% yield (38.0 mg) as a white solid.

**4ga**: m.p. 86.6-87.7 °C; <sup>1</sup>H NMR (400 MHz, CDCl<sub>3</sub>) δ 7.29 – 7.23 (m, 2H), 7.03 – 6.95 (m, 1H), 6.84 (d, *J* = 8.6 Hz, 3H), 6.72 (d, *J* = 2.9 Hz, 1H), 6.64 (dd, *J* = 8.6, 3.0 Hz, 1H), 5.10 (s, 1H), 2.14 (s, 3H); <sup>13</sup>C NMR (101 MHz, CDCl<sub>3</sub>) δ 158.72, 152.09, 147.52, 132.03, 129.62 (2C), 122.01, 121.83, 117.97, 116.20 (2C), 113.76, 16.29. HRMS (EI-TOF, *m/z*) calcd for C<sub>13</sub>H<sub>12</sub>O<sub>2</sub> [M]<sup>+</sup> 200.0837, found 200.0836.

**4ga'**: m.p. 88.1-89.4 °C; <sup>1</sup>H NMR (400 MHz, CDCl<sub>3</sub>) δ 7.31 – 7.26 (m, 2H), 7.05 – 7.01 (m, 1H), 6.96 – 6.91 (m, 2H), 6.83 (d, *J* = 2.6 Hz, 1H), 6.78 – 6.72 (m, 2H), 4.74 (s, 1H), 2.22 (s, 3H); <sup>13</sup>C NMR (101 MHz, CDCl<sub>3</sub>) δ 158.58, 150.05, 149.92, 129.59 (2C), 125.35, 122.39, 122.36, 118.27, 117.59 (2C), 115.74, 15.96. HRMS (EI-TOF, *m/z*) calcd for C<sub>13</sub>H<sub>12</sub>O<sub>2</sub> [M]<sup>+</sup> 200.0837, found 200.0836.

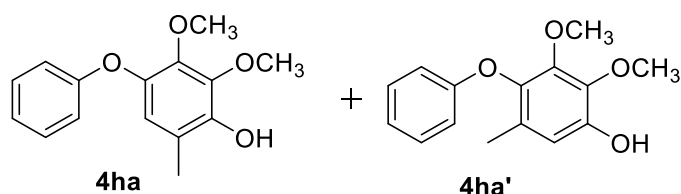

### 2,3-dimethoxy-6-methyl-4-phenoxyphenol (**4ha**)

### 2,3-dimethoxy-5-methyl-4-phenoxyphenol (**4ha'**)

**4ha** and **4ha'** was synthesized following the general procedure for 1,6-addition. After purification by preparative thin-layer chromatography using PE/EtOAc (4/1) as the eluent. **4ha** was obtained in 31% yield (80.7 mg) as a white solid. **4ha'** was obtained in 19% yield (49.5 mg) as a white solid.

**4ha**: m.p. 168.5-169.4 °C; <sup>1</sup>H NMR (400 MHz, CDCl<sub>3</sub>) δ 7.28 – 7.22 (m, 2H), 7.00 – 6.94 (m, 1H), 6.85 – 6.80 (m, 2H), 6.60 (d, *J* = 0.6 Hz, 1H), 5.69 (s, 1H), 3.91 (s, 3H), 3.77 (s, 3H), 2.07 (s, 3H); <sup>13</sup>C NMR (101 MHz, CDCl<sub>3</sub>) δ 158.50, 146.10, 145.75, 138.91, 138.27,

129.53 (2C), 127.80, 121.59, 114.72 (2C), 111.03, 61.31, 60.84, 15.94. HRMS (EI-TOF, m/z) calcd for C<sub>15</sub>H<sub>16</sub>O<sub>4</sub> [M]<sup>+</sup> 260.1049, found 260.1048.

**4ha'**: m.p. 170.1-171.9 °C; <sup>1</sup>H NMR (400 MHz, CDCl<sub>3</sub>) δ 7.30 – 7.25 (m, 2H), 7.03 – 6.98 (m, 1H), 6.91 (dt, *J* = 4.5, 1.8 Hz, 2H), 6.57 (d, *J* = 0.4 Hz, 1H), 5.71 (s, 1H), 3.96 (s, 3H), 3.80 (s, 3H), 2.18 (s, 3H); <sup>13</sup>C NMR (101 MHz, CDCl<sub>3</sub>) δ 158.83, 144.11, 142.83, 140.74, 139.91, 129.51 (2C), 122.03, 119.05, 118.35, 116.21 (2C), 61.27, 61.02, 15.27. HRMS (EI-TOF, m/z) calcd for C<sub>15</sub>H<sub>16</sub>O<sub>4</sub> [M]<sup>+</sup> 260.1049, found 260.1050.

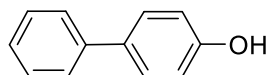

**5aa**

#### [1,1'-biphenyl]-4-ol

**5aa** was synthesized following the general procedure for one-pot construction of 4-phenylphenols. After purification by preparative thin-layer chromatography using PE/EtOAc (6/1) as the eluent, **5aa** was obtained in 76% yield (163.7 mg) as a white solid.

**5aa**: m.p. 114.4-116.0 °C; <sup>1</sup>H NMR (400 MHz, DMSO-*d*<sub>6</sub>) δ 9.54 (s, 1H), 7.59 – 7.54 (m, 2H), 7.51 – 7.46 (m, 2H), 7.40 (t, *J* = 7.7 Hz, 2H), 7.27 (t, *J* = 7.3 Hz, 1H), 6.89 – 6.83 (m, 2H); <sup>13</sup>C NMR (101 MHz, DMSO-*d*<sub>6</sub>) δ 157.08, 140.19, 130.90, 128.75 (2C), 127.69 (2C), 126.31, 125.92 (2C), 115.68 (2C); HRMS (EI-TOF, m/z) calcd for C<sub>12</sub>H<sub>10</sub>O [M]<sup>+</sup> 170.0732, found 170.0730.

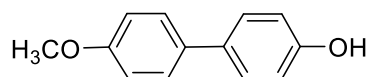

**5ab**

#### 4'-methoxy-[1,1'-biphenyl]-4-ol

**5ab** was synthesized following the general procedure for one-pot construction of 4-phenylphenols. After purification by preparative thin-layer chromatography using PE/EtOAc (5/1) as the eluent, **5ab** was obtained in 60% yield (120.1 mg) as a white solid.

**5ab**: m.p. 138.1-139.5 °C; <sup>1</sup>H NMR (400 MHz, DMSO-*d*<sub>6</sub>) δ 9.44 (s, 1H), 7.52 – 7.39 (m, 4H), 7.00 – 6.92 (m, 2H), 6.87 – 6.79 (m, 2H), 3.77 (s, 3H); <sup>13</sup>C NMR (101 MHz, DMSO-*d*<sub>6</sub>) δ 158.06, 156.48, 132.72, 130.70, 127.17 (2C), 126.95 (2C), 115.60 (2C), 114.17 (2C), 55.04. HRMS (EI-TOF, m/z) calcd for C<sub>13</sub>H<sub>12</sub>O<sub>2</sub> [M]<sup>+</sup> 200.0837, found 200.0835.

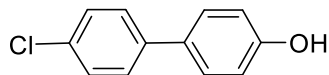

**5ac**

#### 4'-chloro-[1,1'-biphenyl]-4-ol

**5ac** was synthesized following the general procedure for one-pot construction of 4-phenylphenols. After purification by preparative thin-layer chromatography using PE/EtOAc (6/1) as the eluent, **5ac** was obtained in 80% yield (163.7 mg) as a white solid.

**5ac**: m.p. 146.5-147.4 °C; <sup>1</sup>H NMR (400 MHz, DMSO-*d*<sub>6</sub>) δ 9.63 (s, 1H), 7.63 – 7.56 (m, 2H), 7.51 – 7.42 (m, 4H), 6.91 – 6.83 (m, 2H); <sup>13</sup>C NMR (101 MHz, DMSO-*d*<sub>6</sub>) δ 157.39, 138.98, 131.08, 129.49, 128.65 (2C), 127.68 (2C), 127.57 (2C), 115.77 (2C). HRMS (EI-TOF, m/z) calcd for C<sub>12</sub>H<sub>9</sub><sup>35</sup>ClO [M]<sup>+</sup> 204.0342, found 204.0339; calcd for C<sub>12</sub>H<sub>9</sub><sup>37</sup>ClO [M]<sup>+</sup> 206.0312, found 206.0315.



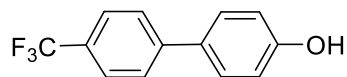

**5ad**

#### 4'-(trifluoromethyl)-[1,1'-biphenyl]-4-ol

**5ad** was synthesized following the general procedure for one-pot construction of 4-phenylphenols. After purification by preparative thin-layer chromatography using PE/EtOAc (6/1) as the eluent, **5ad** was obtained in 81% yield (192.9 mg) as a white solid.

**5ad**: m.p. 118.2-119.5 °C; <sup>1</sup>H NMR (400 MHz, DMSO-*d*<sub>6</sub>) δ 9.75 (s, 1H), 7.81 – 7.69 (m, 4H), 7.57 (d, *J* = 8.6 Hz, 2H), 6.91 (d, *J* = 8.6 Hz, 2H); <sup>13</sup>C NMR (101 MHz, DMSO-*d*<sub>6</sub>) δ 158.01, 144.09 (d, *J*<sub>CF</sub> = 1.1 Hz), 129.15, 128.13 (2C), 126.71 (q, *J*<sub>CF</sub> = 31.8 Hz, 2C), 126.41 (2C), 125.54 (q, *J*<sub>CF</sub> = 3.7 Hz), 124.43 (q, *J*<sub>CF</sub> = 271.7 Hz), 115.89 (2C). HRMS (EI-TOF, *m/z*) calcd for C<sub>13</sub>H<sub>9</sub>F<sub>3</sub>O [M]<sup>+</sup> 238.0605, found 238.0607.

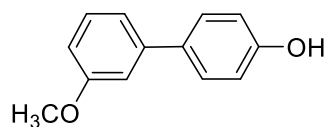

**5ae**

#### 3'-methoxy-[1,1'-biphenyl]-4-ol

**5ae** was synthesized following the general procedure for one-pot construction of 4-phenylphenols. After purification by preparative thin-layer chromatography using PE/EtOAc (5/1) as the eluent, **5ae** was obtained in 71% yield (142.2 mg) as a white solid.

**5ae**: m.p. 121.9-122.4 °C; <sup>1</sup>H NMR (400 MHz, CDCl<sub>3</sub>) δ 7.48 – 7.43 (m, 2H), 7.31 (t, *J* = 7.9 Hz, 1H), 7.12 (ddd, *J* = 7.6, 1.7, 1.0 Hz, 1H), 7.07 (dd, *J* = 2.6, 1.7 Hz, 1H), 6.91 – 6.83 (m, 3H), 5.74 (s, 1H), 3.84 (s, 3H); <sup>13</sup>C NMR (101 MHz, CDCl<sub>3</sub>) δ 159.83, 155.29, 142.38, 133.76, 129.82, 128.49 (2C), 119.46, 115.75 (2C), 112.59, 112.19, 55.41. HRMS (EI-TOF, *m/z*) calcd for C<sub>13</sub>H<sub>12</sub>O<sub>2</sub> [M]<sup>+</sup> 200.0837, found 200.0839.

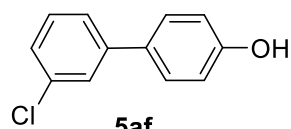

**5af**

#### 3'-chloro-[1,1'-biphenyl]-4-ol

**5af** was synthesized following the general procedure for one-pot construction of 4-phenylphenols. After purification by preparative thin-layer chromatography using PE/EtOAc (6/1) as the eluent, **5af** was obtained in 75% yield (153.5 mg) as a white solid.

**5af**: m.p. 130.5-131.9 °C; <sup>1</sup>H NMR (400 MHz, CDCl<sub>3</sub>) δ 7.50 (t, *J* = 1.8 Hz, 1H), 7.45 – 7.40 (m, 2H), 7.38 (dt, *J* = 7.6, 1.5 Hz, 1H), 7.31 (t, *J* = 7.7 Hz, 1H), 7.28 – 7.23 (m, 1H), 6.93 – 6.87 (m, 2H), 5.43 (s, 1H); <sup>13</sup>C NMR (101 MHz, CDCl<sub>3</sub>) δ 155.48, 142.57, 134.61, 132.60, 129.99, 128.45 (2C), 126.82, 126.72, 124.84, 115.88 (2C). HRMS (EI-TOF, *m/z*) calcd for C<sub>12</sub>H<sub>9</sub><sup>35</sup>ClO [M]<sup>+</sup> 204.0342, found 204.0343; calcd for C<sub>12</sub>H<sub>9</sub><sup>37</sup>ClO [M]<sup>+</sup> 206.0312, found 206.0320.

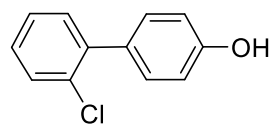

**5ag**

### 2'-chloro-[1,1'-biphenyl]-4-ol

**5ag** was synthesized following the general procedure for one-pot construction of 4-phenylphenols. After purification by preparative thin-layer chromatography using PE/EtOAc (6/1) as the eluent, **5ag** was obtained in 60% yield (122.8 mg) as a white solid.

**5ag**: m.p. 119.8-120.7 °C; <sup>1</sup>H NMR (400 MHz, CDCl<sub>3</sub>) δ 7.46 – 7.42 (m, 1H), 7.35 – 7.21 (m, 5H), 6.91 – 6.88 (m, 2H), 5.32 (s, 1H); <sup>13</sup>C NMR (101 MHz, CDCl<sub>3</sub>) δ 155.10, 140.08, 132.59, 132.05, 131.39, 130.88 (2C), 129.96, 128.25, 126.84, 115.03 (2C). HRMS (EI-TOF, m/z) calcd for C<sub>12</sub>H<sub>9</sub><sup>35</sup>ClO [M]<sup>+</sup> 204.0342, found 204.0344; calcd for C<sub>12</sub>H<sub>9</sub><sup>37</sup>ClO [M]<sup>+</sup> 206.0312, found 206.0318.

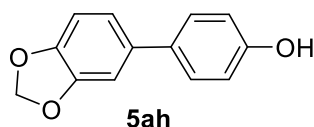

### 4-(benzo[d][1,3]dioxol-5-yl)phenol

**5ah** was synthesized following the general procedure for one-pot construction of 4-phenylphenols. After purification by preparative thin-layer chromatography using PE/EtOAc (6/1) as the eluent, **5ah** was obtained in 60% yield (128.5 mg) as a white solid.

**5ah**: m.p. 147.1-148.3 °C; <sup>1</sup>H NMR (400 MHz, DMSO-*d*<sub>6</sub>) δ 9.48 (s, 1H), 7.43 – 7.38 (m, 2H), 7.14 (d, *J* = 1.7 Hz, 1H), 7.03 (dd, *J* = 8.1, 1.8 Hz, 1H), 6.93 (d, *J* = 8.1 Hz, 1H), 6.85 – 6.80 (m, 2H), 6.03 (s, 2H); <sup>13</sup>C NMR (101 MHz, DMSO-*d*<sub>6</sub>) δ 156.68, 147.79, 145.93, 134.67, 130.77, 127.45 (2C), 119.22, 115.55 (2C), 108.48, 106.54, 100.87. HRMS (EI-TOF, m/z) calcd for C<sub>13</sub>H<sub>10</sub>O<sub>3</sub> [M]<sup>+</sup> 214.0630, found 214.0632.

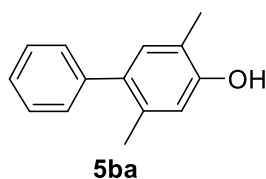

### 2,5-dimethyl-[1,1'-biphenyl]-4-ol

**5ba** was synthesized following the general procedure for one-pot construction of 4-phenylphenols. After purification by preparative thin-layer chromatography using PE/EtOAc (6/1) as the eluent, **5ba** was obtained in 85% yield (168.5 mg) as a white solid.

**5ba**: m.p. 126.8-127.9 °C; <sup>1</sup>H NMR (400 MHz, CDCl<sub>3</sub>) δ 7.39 – 7.35 (m, 2H), 7.31 – 7.26 (m, 3H), 6.99 (s, 1H), 6.67 (s, 1H), 4.87 (s, 1H), 2.24 (s, 3H), 2.19 (s, 3H); <sup>13</sup>C NMR (101 MHz, CDCl<sub>3</sub>) δ 152.87, 141.74, 134.66, 134.24, 132.53, 129.45 (2C), 128.05 (2C), 126.47, 121.03, 116.72, 20.10, 15.32. HRMS (EI-TOF, m/z) calcd for C<sub>14</sub>H<sub>14</sub>O [M]<sup>+</sup> 198.1045, found 198.1043.

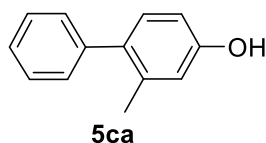

### 2-methyl-[1,1'-biphenyl]-4-ol

**5ca** was synthesized following the general procedure for one-pot construction of 4-phenylphenols. After purification by preparative thin-layer chromatography using PE/EtOAc (6/1) as the eluent, **5ca** was obtained in 88% yield (162.1 mg) as a white solid.

**5ca**: m.p. 124.4-125.7 °C; <sup>1</sup>H NMR (400 MHz, CDCl<sub>3</sub>) δ 7.41 – 7.36 (m, 2H), 7.33 – 7.27 (m, 3H), 7.10 (d, *J* = 8.2 Hz, 1H), 6.77 – 6.68 (m, 2H), 4.97 (s, 1H), 2.23 (s, 3H); <sup>13</sup>C NMR (101 MHz, CDCl<sub>3</sub>) δ 154.63, 141.58, 137.05, 134.80, 131.05, 129.41 (2C), 128.04 (2C), 126.51, 116.94, 112.67, 20.58. HRMS (EI-TOF, *m/z*) calcd for C<sub>13</sub>H<sub>12</sub>O [M]<sup>+</sup> 184.0888, found 184.0885.

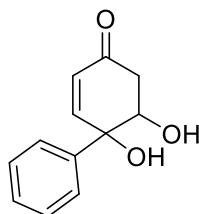

**7**

#### 1,2-dihydroxy-2,3-dihydro-[1,1'-biphenyl]-4(1H)-one

**7** was synthesized following the general procedure for transformation of products. After purification by preparative thin-layer chromatography using DCM/EtOAc (3/1) as the eluent, **7** was obtained in 85% yield (86.8 mg) as a white oil.

**7**: <sup>1</sup>H NMR (400 MHz, CDCl<sub>3</sub>) δ 7.47 (d, *J* = 7.1 Hz, 2H), 7.43 – 7.31 (m, 3H), 6.79 – 6.66 (m, 1H), 6.22 (d, *J* = 10.2 Hz, 1H), 4.19 (s, 1H), 3.92 (s, 1H), 3.41 (s, 1H), 2.69 – 2.46 (m, 2H); <sup>13</sup>C NMR (101 MHz, CDCl<sub>3</sub>) δ 197.63, 149.46, 140.60, 129.89, 128.81 (2C), 128.54, 126.11 (2C), 74.84, 74.55, 41.76. HRMS (EI-TOF, *m/z*) calcd for C<sub>12</sub>H<sub>12</sub>O<sub>3</sub> [M]<sup>+</sup> 204.0786, found 204.0787.

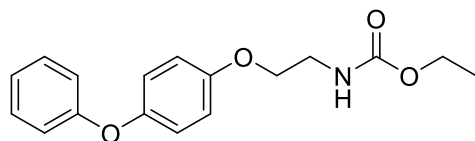

**fenoxycard**

#### ethyl (2-(4-phenoxyphenoxy)ethyl)carbamate

**Fenoxycard** was synthesized following the general procedure for transformation of products. After purification by preparative thin-layer chromatography using PE/EtOAc (5/1) as the eluent, **fenoxycard** was obtained in 86% yield (259.2 mg) as a white solid.

**Fenoxycard**: m.p. 53.3-54.6 °C; <sup>1</sup>H NMR (400 MHz, CDCl<sub>3</sub>) δ 7.32 – 7.26 (m, 2H), 7.04 (t, *J* = 7.4 Hz, 1H), 6.98 – 6.91 (m, 4H), 6.88 – 6.83 (m, 2H), 5.21 (s, 1H), 4.13 (dd, *J* = 14.0, 7.0 Hz, 2H), 4.00 (t, *J* = 5.1 Hz, 2H), 3.57 (d, *J* = 5.1 Hz, 2H), 1.24 (t, *J* = 7.0 Hz, 3H); <sup>13</sup>C NMR (101 MHz, CDCl<sub>3</sub>) δ 158.35, 156.72, 154.77, 150.59, 129.65 (2C), 122.58, 120.80 (2C), 117.73 (2C), 115.55 (2C), 67.49, 60.97, 40.53, 14.65. HRMS (EI-TOF, *m/z*) calcd for C<sub>17</sub>H<sub>19</sub>NO<sub>4</sub> [M]<sup>+</sup> 301.1314, found 301.1312.

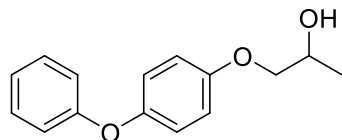

**8**

#### 1-(4-phenoxyphenoxy)propan-2-ol

**8** was synthesized following the general procedure for transformation of products. After purification by preparative thin-layer chromatography using PE/EtOAc (5/1) as the eluent, **8** was obtained in 86% yield (210.1 mg) as a white oil.

**8**:  $^1\text{H}$  NMR (400 MHz,  $\text{CDCl}_3$ )  $\delta$  7.31 – 7.26 (m, 2H), 7.03 (t,  $J = 7.4$  Hz, 1H), 6.96 (ddd,  $J = 10.8, 7.2, 5.6$  Hz, 4H), 6.91 – 6.85 (m, 2H), 4.23 – 4.14 (m, 1H), 3.84 (ddd,  $J = 16.9, 9.2, 5.5$  Hz, 2H), 2.41 (s, 1H), 1.28 (d,  $J = 6.4$  Hz, 3H);  $^{13}\text{C}$  NMR (101 MHz,  $\text{CDCl}_3$ )  $\delta$  158.38, 154.87, 150.59, 129.67 (2C), 122.58, 120.81 (2C), 117.73 (2C), 115.69 (2C), 73.90, 66.30, 18.83. HRMS (EI-TOF,  $m/z$ ) calcd for  $\text{C}_{15}\text{H}_{16}\text{O}_3$   $[\text{M}]^+$  244.1099, found 244.1098.

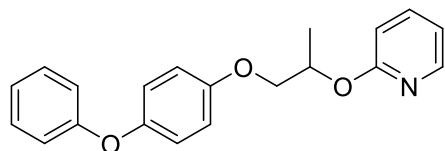

**pyriproxyfen**

### **2-((1-(4-phenoxyphenoxy)propan-2-yl)oxy)pyridine**

**Pyriproxyfen** was synthesized following the general procedure for transformation of products. After purification by preparative thin-layer chromatography using PE/EtOAc (10/1) as the eluent, **pyriproxyfen** was obtained in 85% yield (136.6 mg) as a white solid.

**Pyriproxyfen**: m.p. 45.8-46.3 °C;  $^1\text{H}$  NMR (400 MHz,  $\text{CDCl}_3$ )  $\delta$  8.15 (dd,  $J = 5.0, 1.5$  Hz, 1H), 7.58 – 7.53 (m, 1H), 7.31 – 7.25 (m, 2H), 7.03 (t,  $J = 7.4$  Hz, 1H), 6.98 – 6.90 (m, 6H), 6.85 (dd,  $J = 6.6, 5.5$  Hz, 1H), 6.74 (d,  $J = 8.3$  Hz, 1H), 5.63 – 5.55 (m, 1H), 4.13 (ddd,  $J = 46.3, 9.9, 5.1$  Hz, 2H), 1.48 (d,  $J = 6.4$  Hz, 3H);  $^{13}\text{C}$  NMR (101 MHz,  $\text{CDCl}_3$ )  $\delta$  163.14, 158.51, 155.24, 150.31, 146.70, 138.80, 129.62 (2C), 122.44, 120.77 (2C), 117.63 (2C), 116.79, 115.82 (2C), 111.74, 71.09, 69.42, 17.02. HRMS (EI-TOF,  $m/z$ ) calcd for  $\text{C}_{20}\text{H}_{19}\text{NO}_3$   $[\text{M}]^+$  321.1365, found 321.1364.

## 4. Mechanistic Investigations

### 4.1 Control experiments

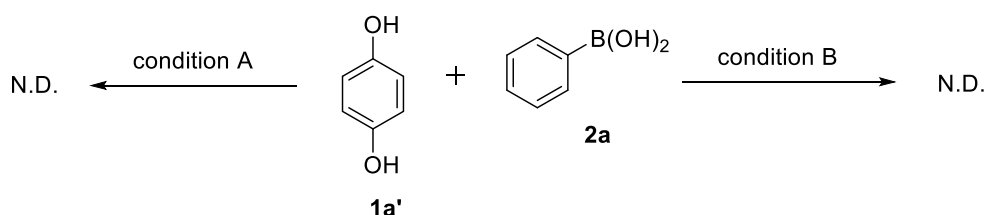

**Condition A:** A 10 mL sealed tube equipped with a stirring bar was charged with quinones **1a'** (1.0 mmol), organic boronic acid **2a** (1.2 mmol), Cu<sub>2</sub>O (2.9 mg, 0.02 mmol, 2.0 mol%) and H<sub>2</sub>O (2.0 mL). The tube was tightly capped and stirred at 25 °C for 24 h. Upon completion, the mixture was diluted with water (2.0 mL) and then extracted with ethyl acetate (5 ml × 3). The combined organic layers were dried over MgSO<sub>4</sub>, filtered, concentrated under reduced pressure, and purified by silica gel column chromatography using CH<sub>2</sub>Cl<sub>2</sub>/EtOAc (9/1) as the eluent to obtain the desired product.

**Condition B:** A 10 mL sealed tube equipped with a stirring bar was charged with quinones **1a'** (1.0 mmol), organic boronic acid **2a** (1.2 mmol), CuFe<sub>2</sub>O<sub>4</sub> (12.0 mg, 0.05 mmol, 5.0 mol%) and MeOH (2.0 mL). The tube was tightly capped and stirred at 25 °C for 24 h. Upon completion, the mixture was diluted with 5 mL of ethyl acetate, filtered through a celite pad and washed with 10 mL of ethyl acetate. The filtrate was collected and concentrated. The residue was purified by silica gel column chromatography using PE/EtOAc (5/1) as the eluent to obtain the desired product.

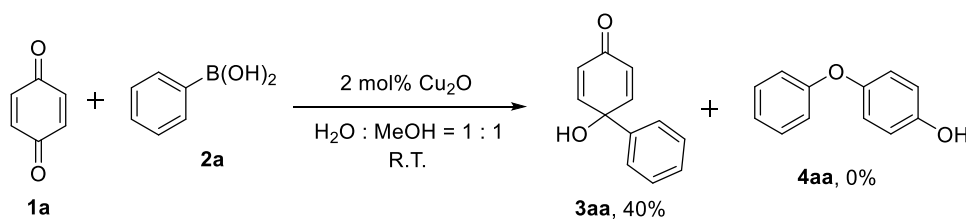

A 10 mL sealed tube equipped with a stirring bar was charged with quinones **1a** (1.0 mmol), organic boronic acid **2a** (1.2 mmol), Cu<sub>2</sub>O (2.9 mg, 0.02 mmol, 2.0 mol%), H<sub>2</sub>O (1.0 mL) and MeOH (1.0 mL). The tube was tightly capped and stirred at 25 °C for 24 h. Upon completion, the mixture was diluted with water (2.0 mL) and then extracted with ethyl acetate (5 ml × 3). The combined organic layers were dried over MgSO<sub>4</sub>, filtered, concentrated under reduced pressure, and purified by silica gel column chromatography using PE/EtOAc (5/1) to CH<sub>2</sub>Cl<sub>2</sub>/EtOAc (9/1) as the eluent to obtain the desired product.

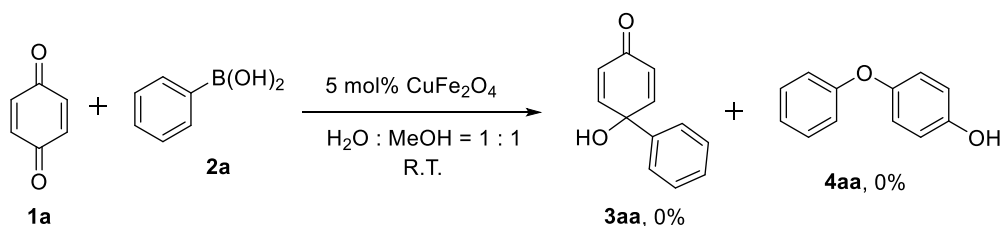

A 10 mL sealed tube equipped with a stirring bar was charged with quinones **1a** (1.0 mmol), organic boronic acid **2a** (1.2 mmol), CuFe<sub>2</sub>O<sub>4</sub> (12.0 mg, 0.05 mmol, 5.0 mol%), H<sub>2</sub>O (1.0 mL) and MeOH (1.0 mL). The tube was tightly capped and stirred at 25 °C for 24 h.

Upon completion, the mixture was diluted with 5 mL of ethyl acetate, filtered through a celite pad and washed with 10 mL of ethyl acetate. The filtrate was collected and concentrated. The residue was purified by silica gel column chromatography using PE/EtOAc (5/1) to CH<sub>2</sub>Cl<sub>2</sub>/EtOAc (9/1) as the eluent to obtain the desired product.

## 4.2 Free Radical Capture Experiment

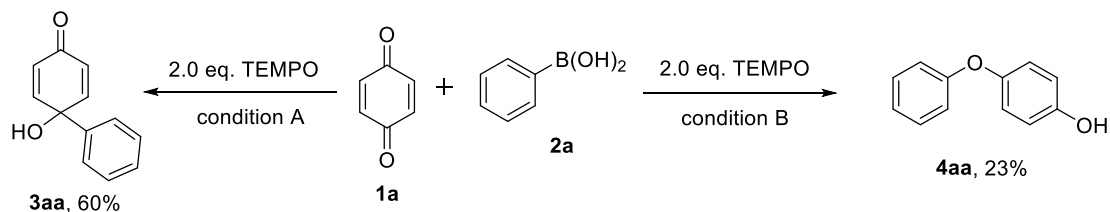

**Condition A:** A 10 mL sealed tube equipped with a stirring bar was charged with quinones **1a** (1.0 mmol), organic boronic acid **2a** (1.2 mmol), Cu<sub>2</sub>O (2.9 mg, 0.02 mmol, 2.0 mol%), TEMPO (2.0 mmol) and H<sub>2</sub>O (2.0 mL). The tube was tightly capped and stirred at 25 °C for 24 h. Upon completion, the mixture was diluted with water (2.0 mL) and then extracted with ethyl acetate (5 ml × 3). The combined organic layers were dried over MgSO<sub>4</sub>, filtered, concentrated under reduced pressure, and purified by silica gel column chromatography using CH<sub>2</sub>Cl<sub>2</sub>/EtOAc (9/1) as the eluent to obtain the desired product.

**Condition B:** A 10 mL sealed tube equipped with a stirring bar was charged with quinones **1a** (1.0 mmol), organic boronic acid **2a** (1.2 mmol), CuFe<sub>2</sub>O<sub>4</sub> (12.0 mg, 0.05 mmol, 5.0 mol%), TEMPO (2.0 mmol) and MeOH (2.0 mL). The tube was tightly capped and stirred at 25 °C for 24. Upon completion, the mixture was diluted with 5 mL of ethyl acetate, filtered through a celite pad and washed with 10 mL of ethyl acetate. The filtrate was collected and concentrated. The residue was purified by silica gel column chromatography using PE/EtOAc (5/1) as the eluent to obtain the desired product.

---

## 5. References

- 1 M. F. Boehm and G. D. Prestwich, *Journal of Labelled Compounds and Radiopharmaceuticals*, 1988, **25**, 1007-1015.

## 6. NMR spectra

### $^1\text{H}$ NMR of compound **3aa**

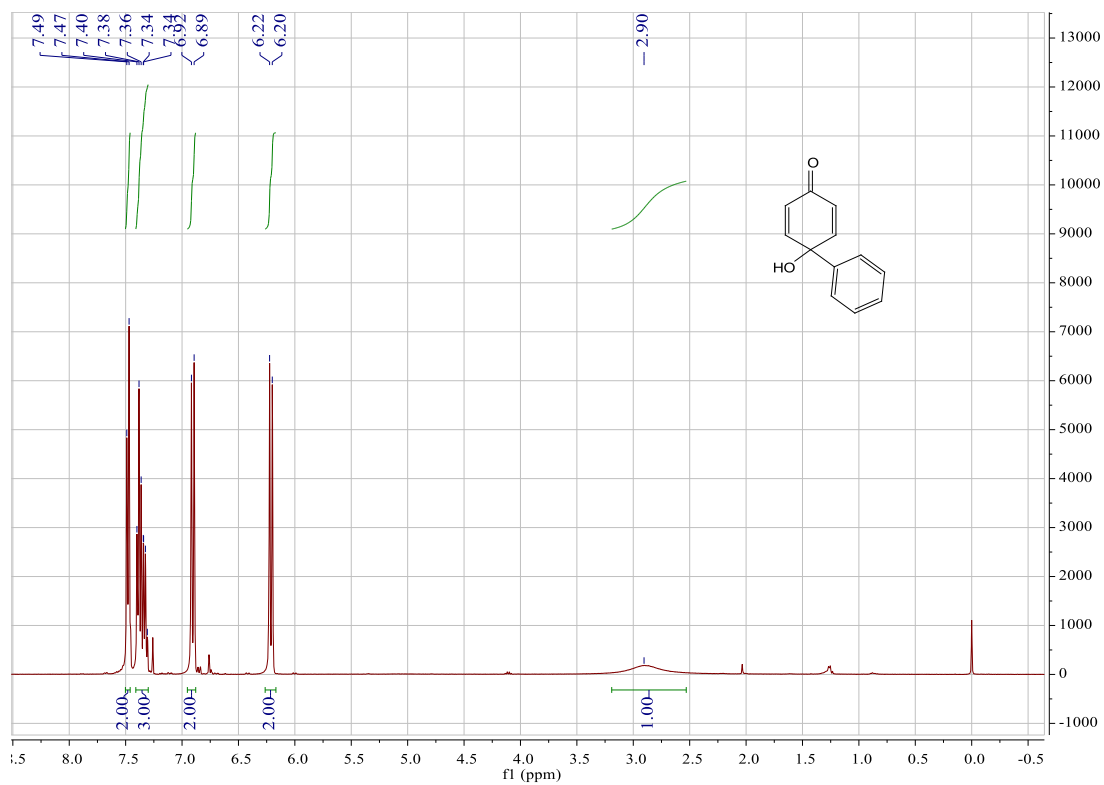

### $^{13}\text{C}$ NMR of compound **3aa**

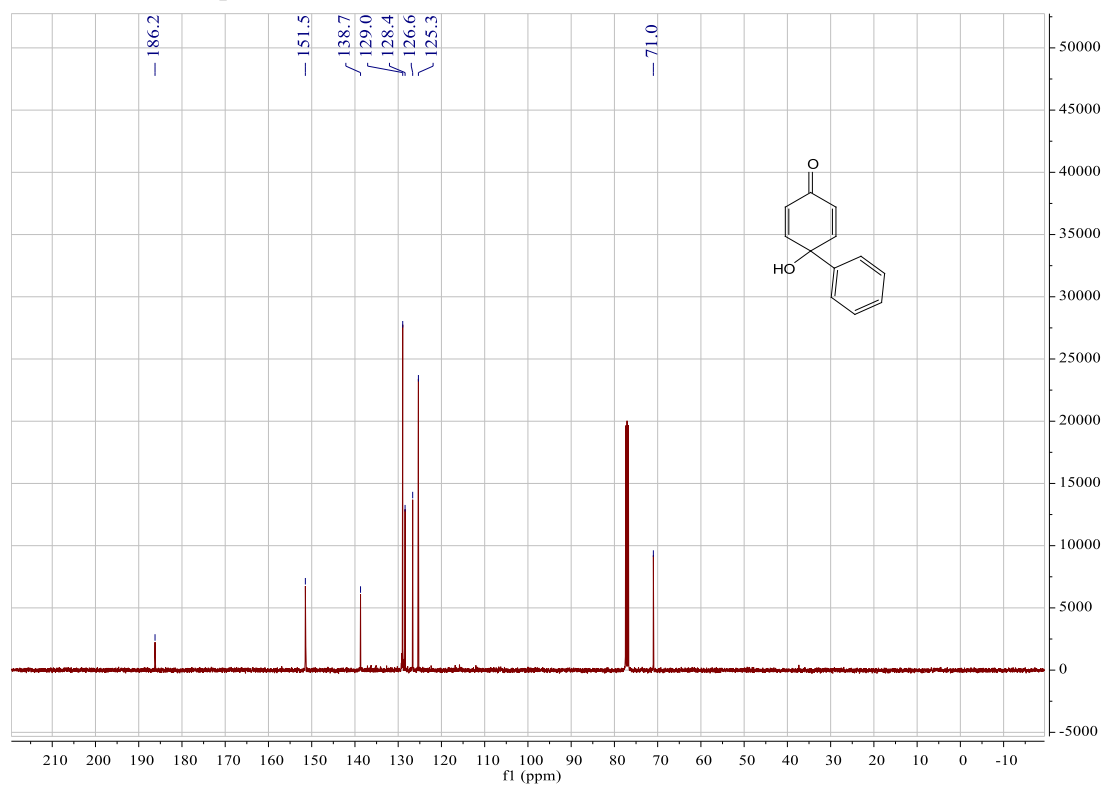



### <sup>1</sup>H NMR of compound **3ab**

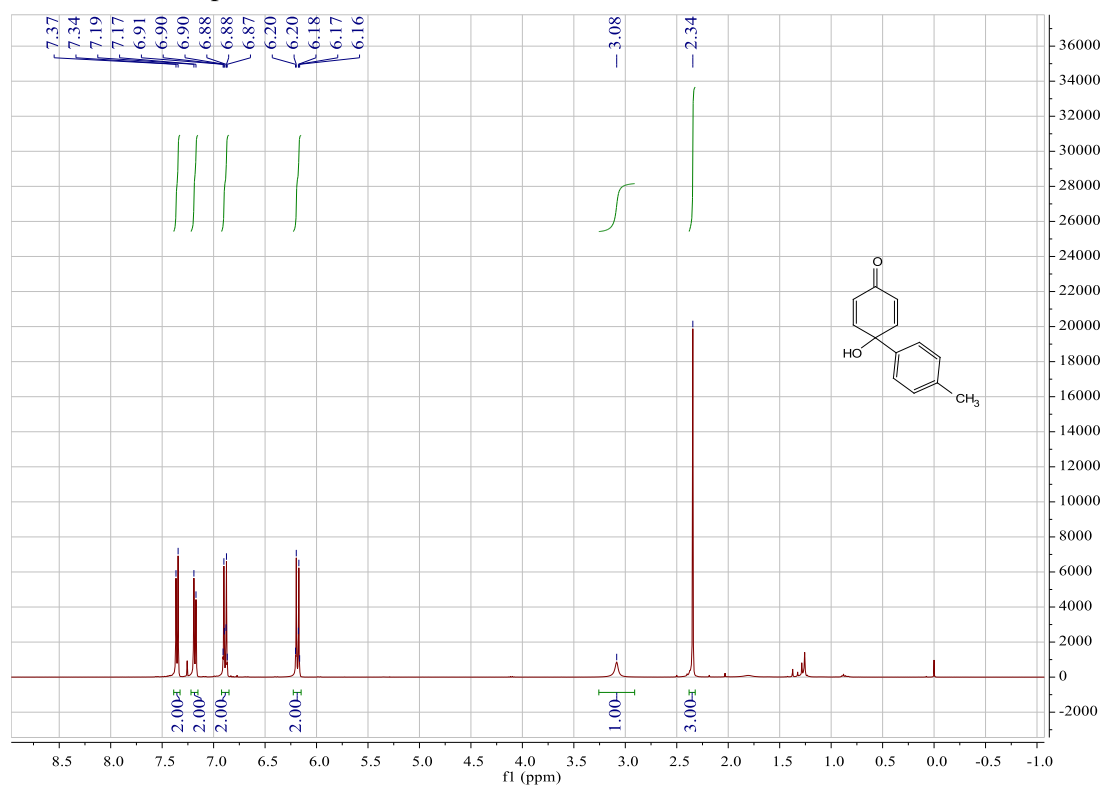

### <sup>13</sup>C NMR of compound **3ab**

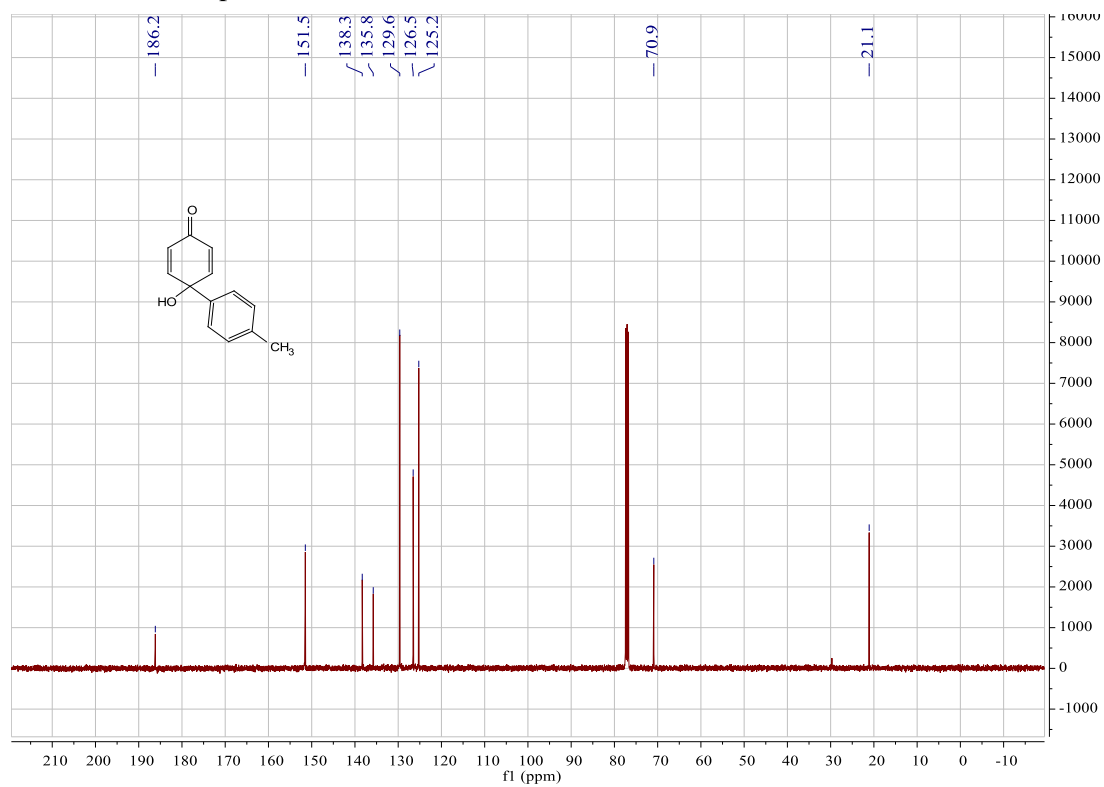

<sup>1</sup>H NMR of compound **3ac**

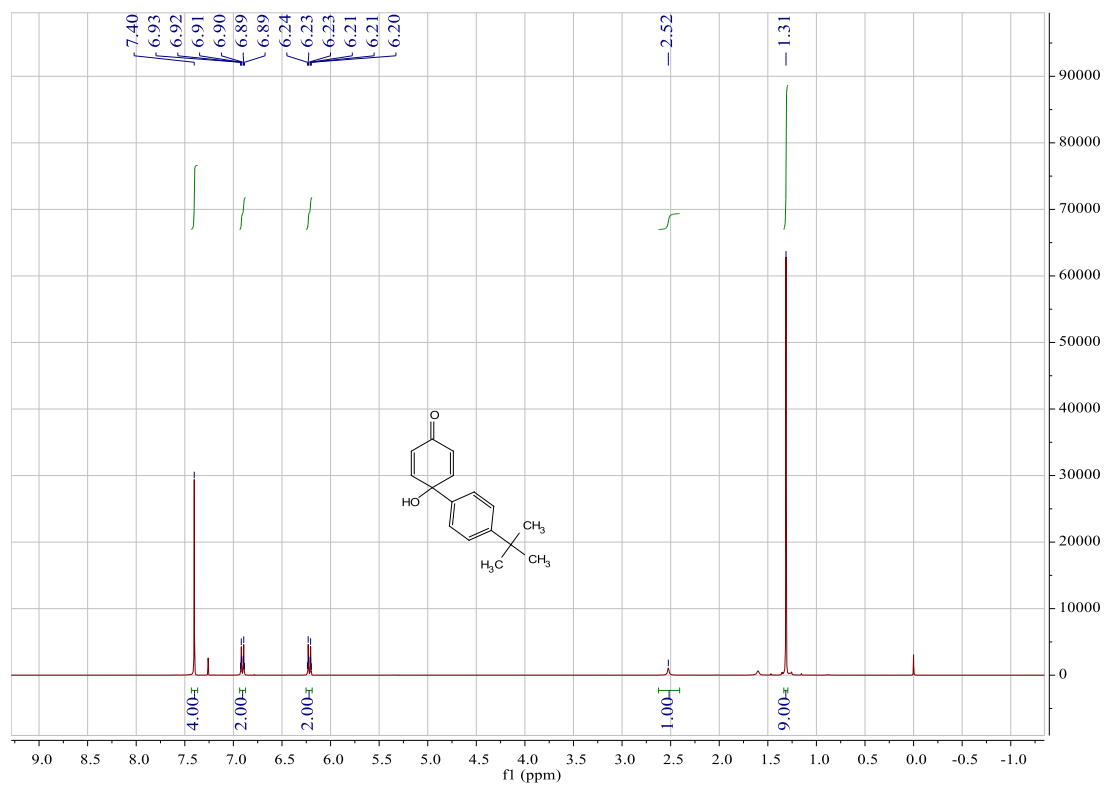

<sup>13</sup>C NMR of compound **3ac**

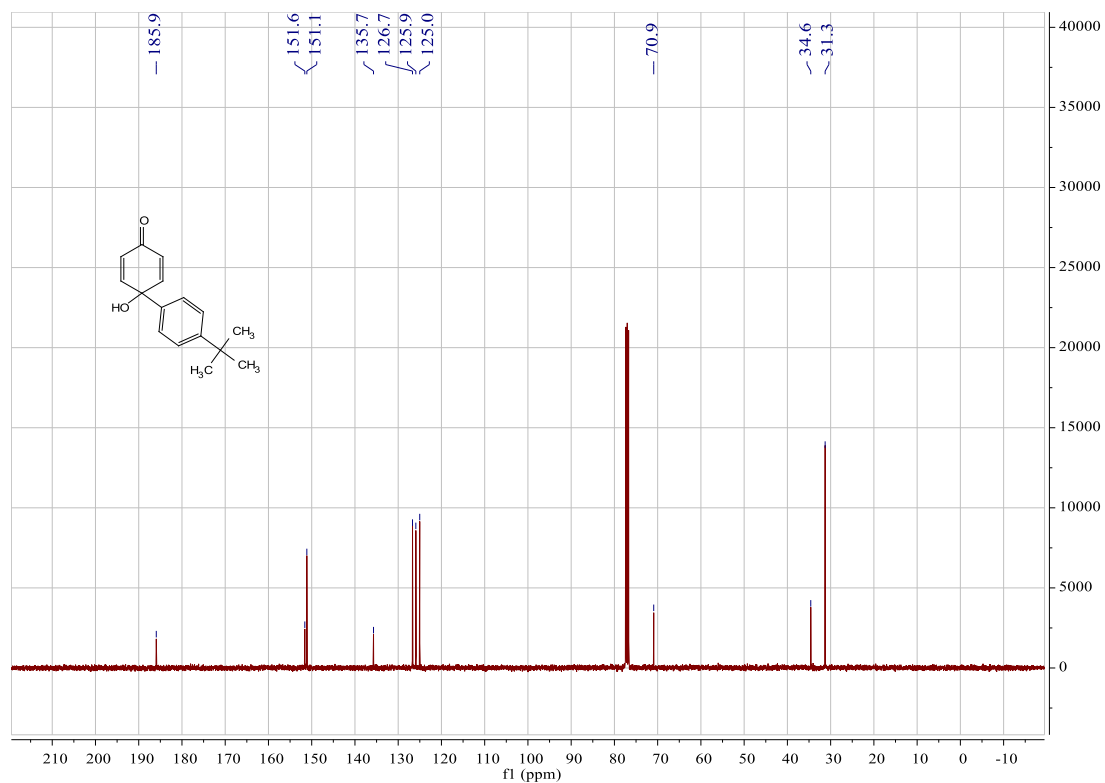

### <sup>1</sup>H NMR of compound **3ad**

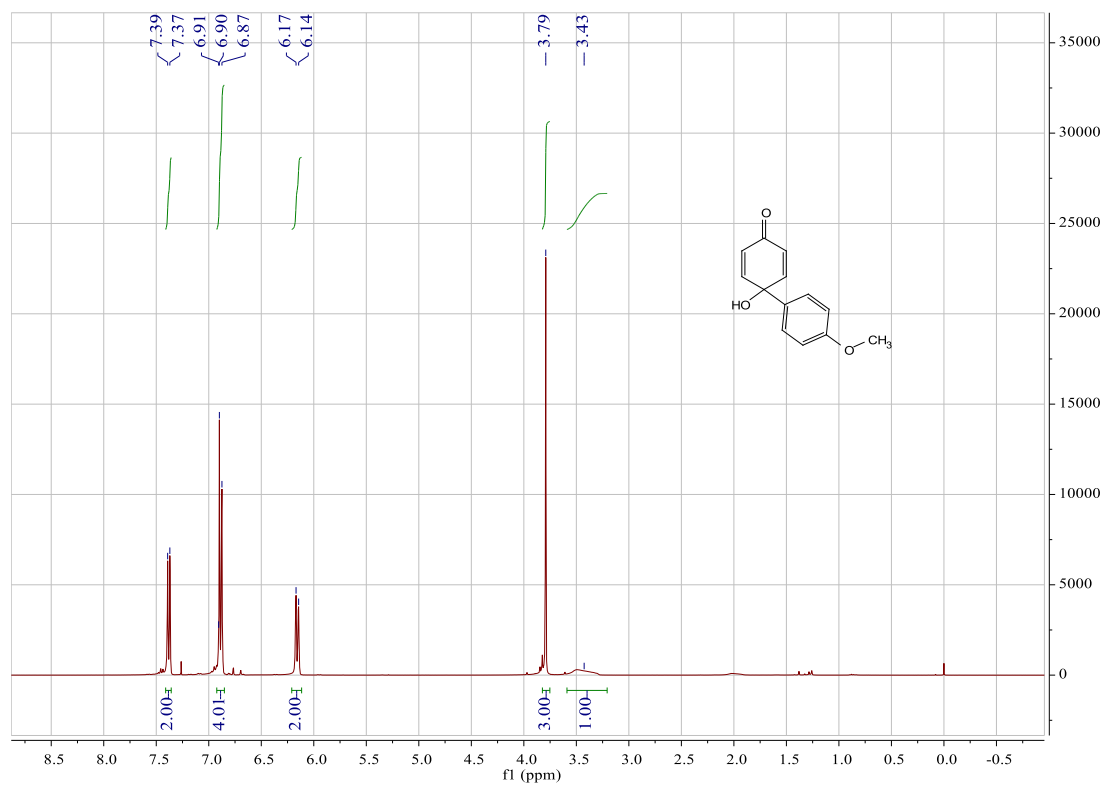

### <sup>13</sup>C NMR of compound **3ad**

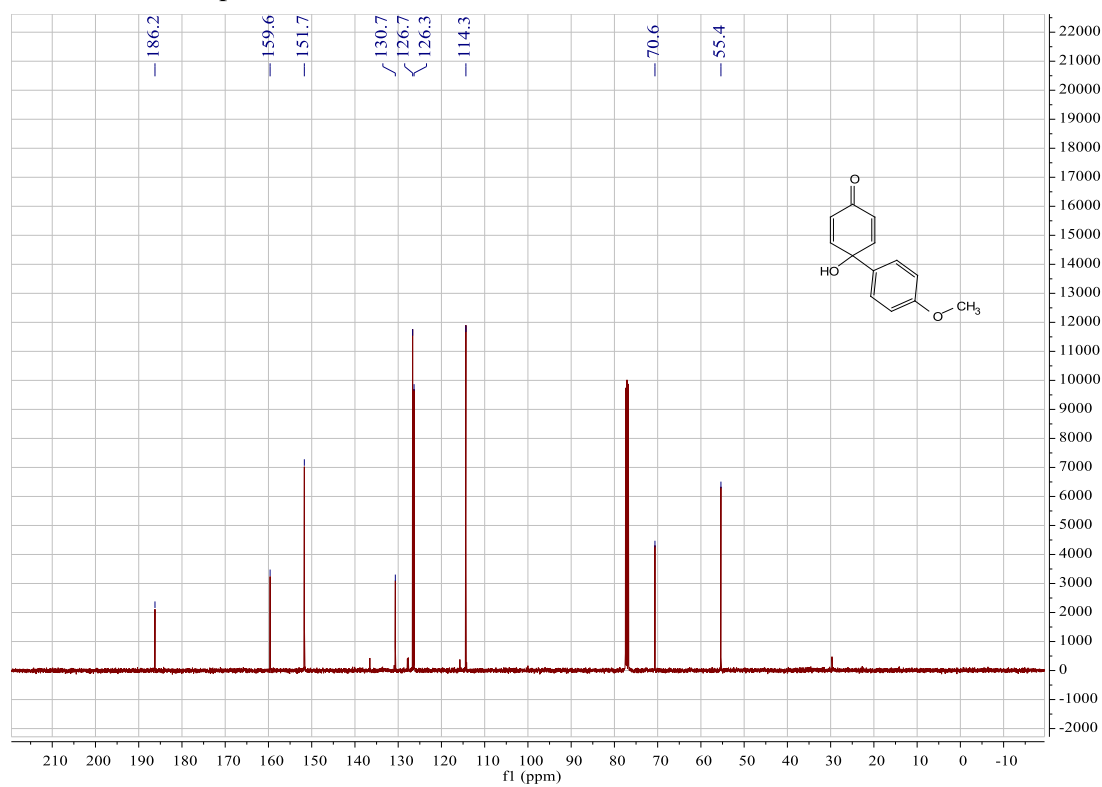

### <sup>1</sup>H NMR of compound **3ae**

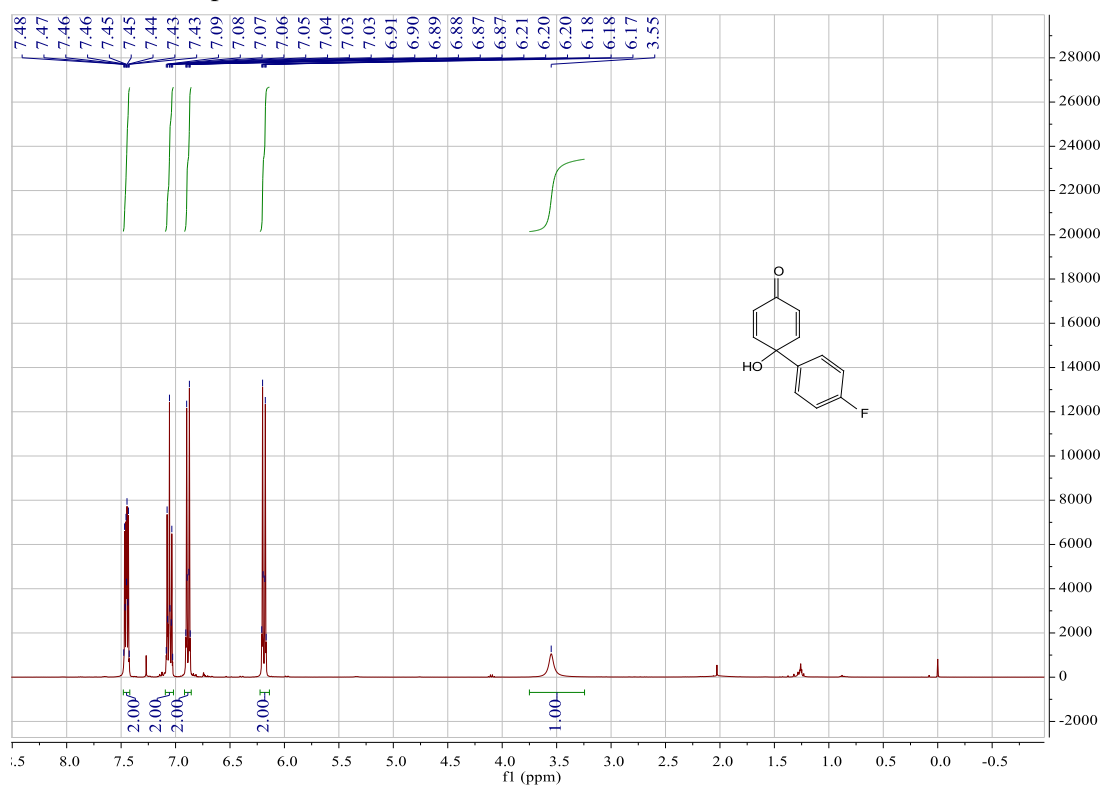

### <sup>13</sup>C NMR of compound **3ae**

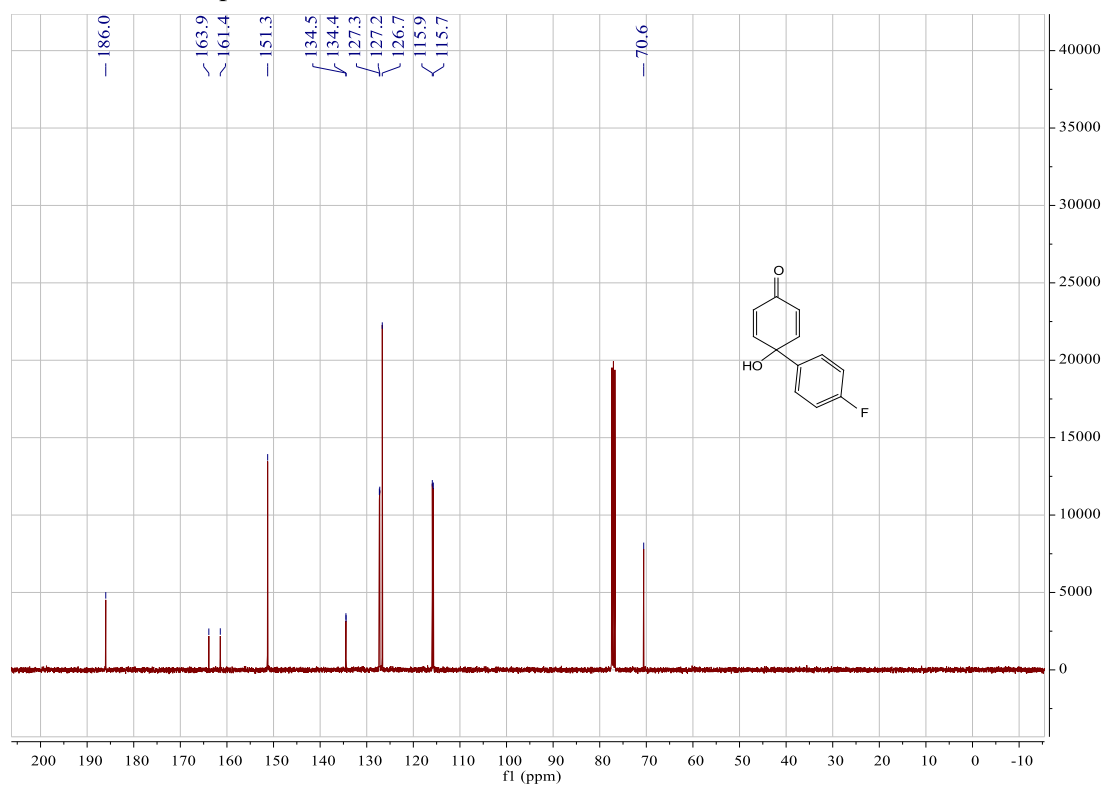

<sup>1</sup>H NMR of compound **3af**

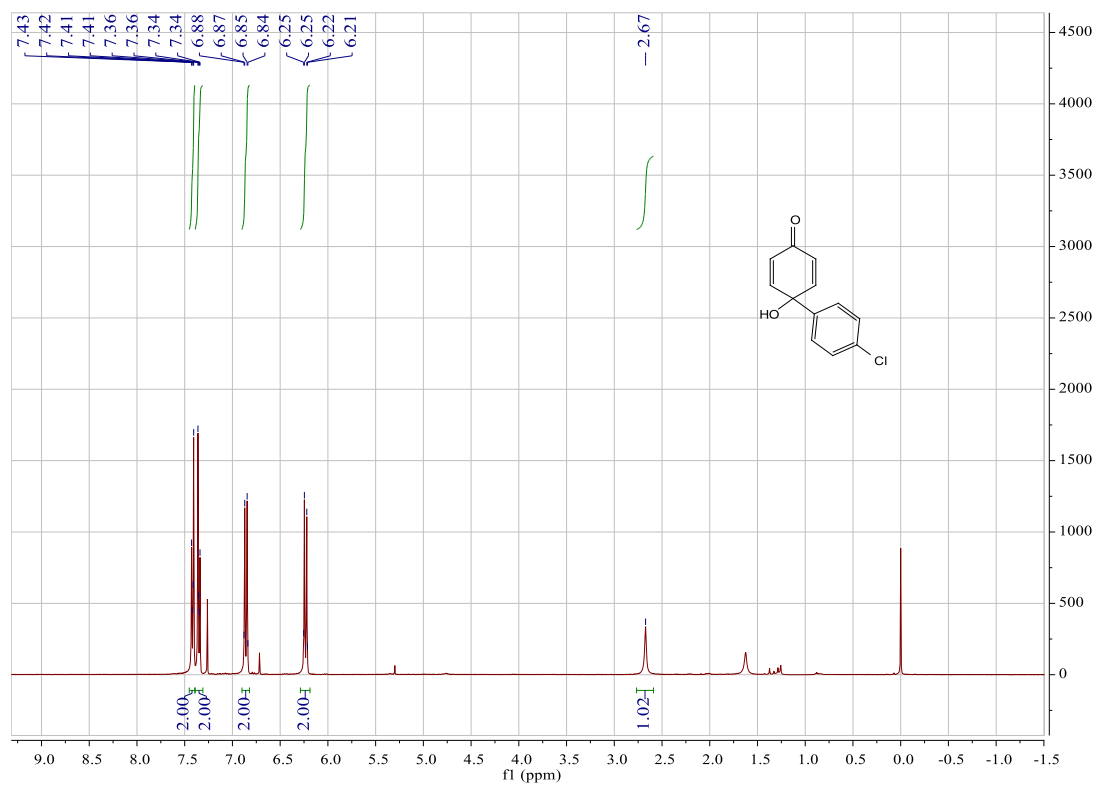

<sup>13</sup>C NMR of compound **3af**

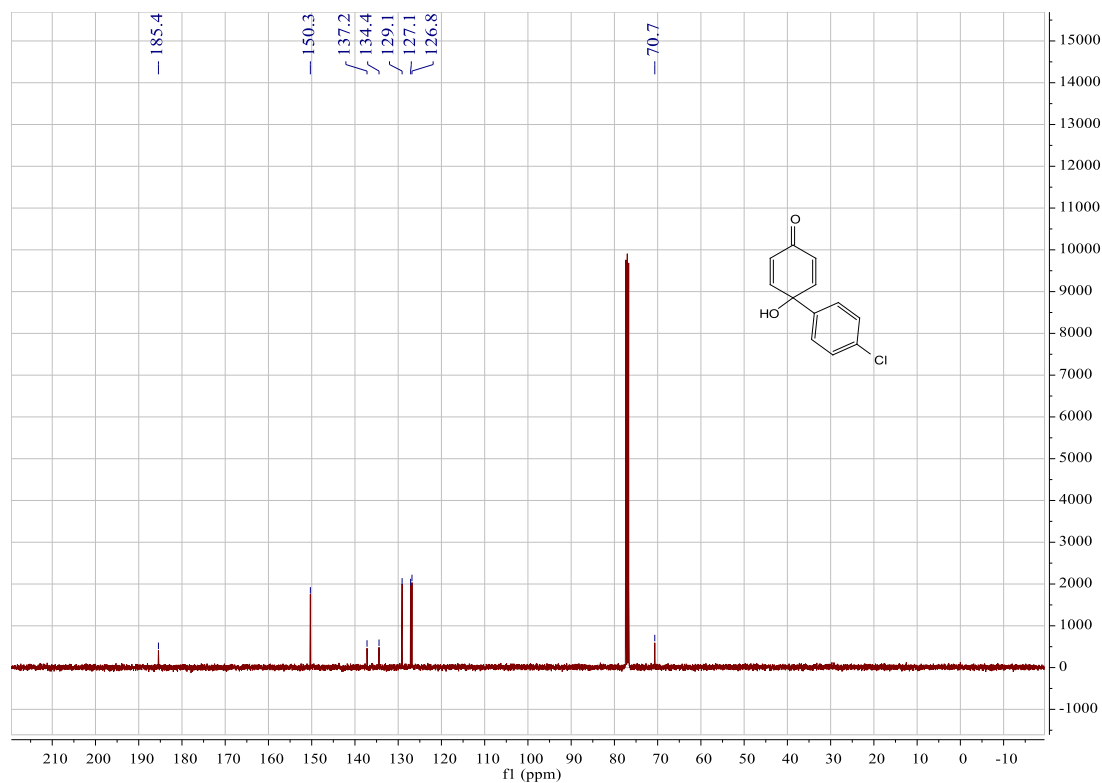

### <sup>1</sup>H NMR of compound **3ag**

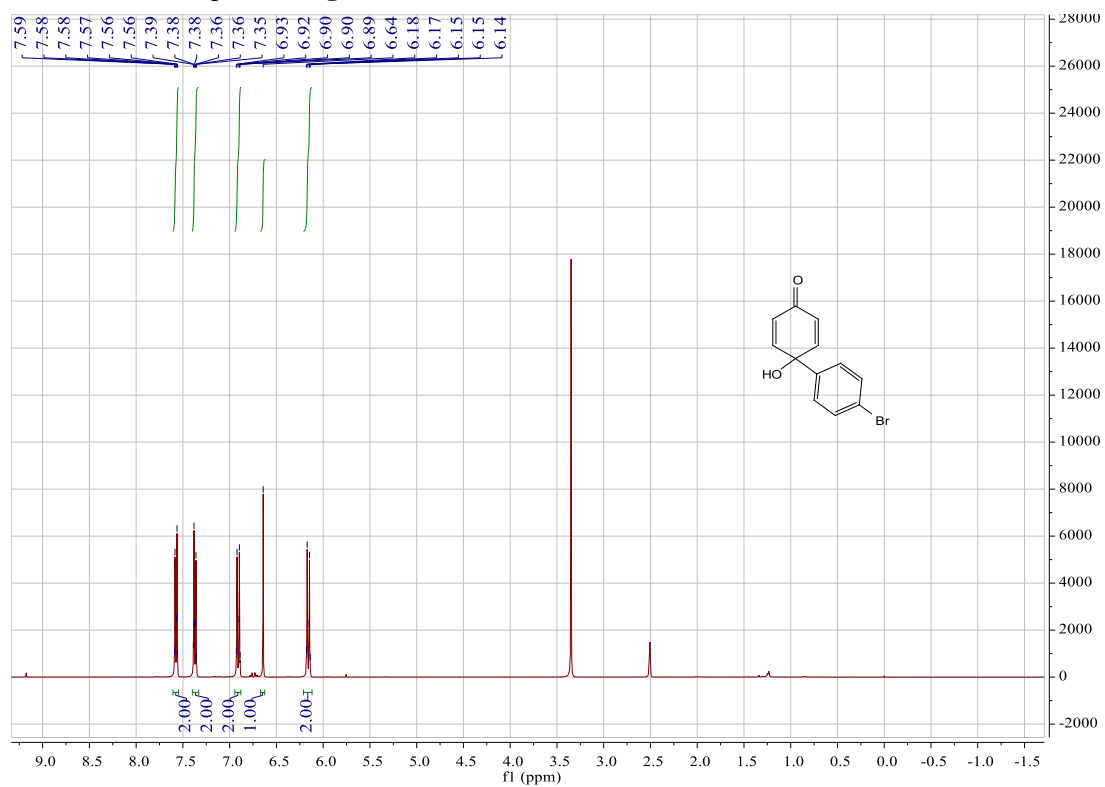

### <sup>13</sup>C NMR of compound **3ag**

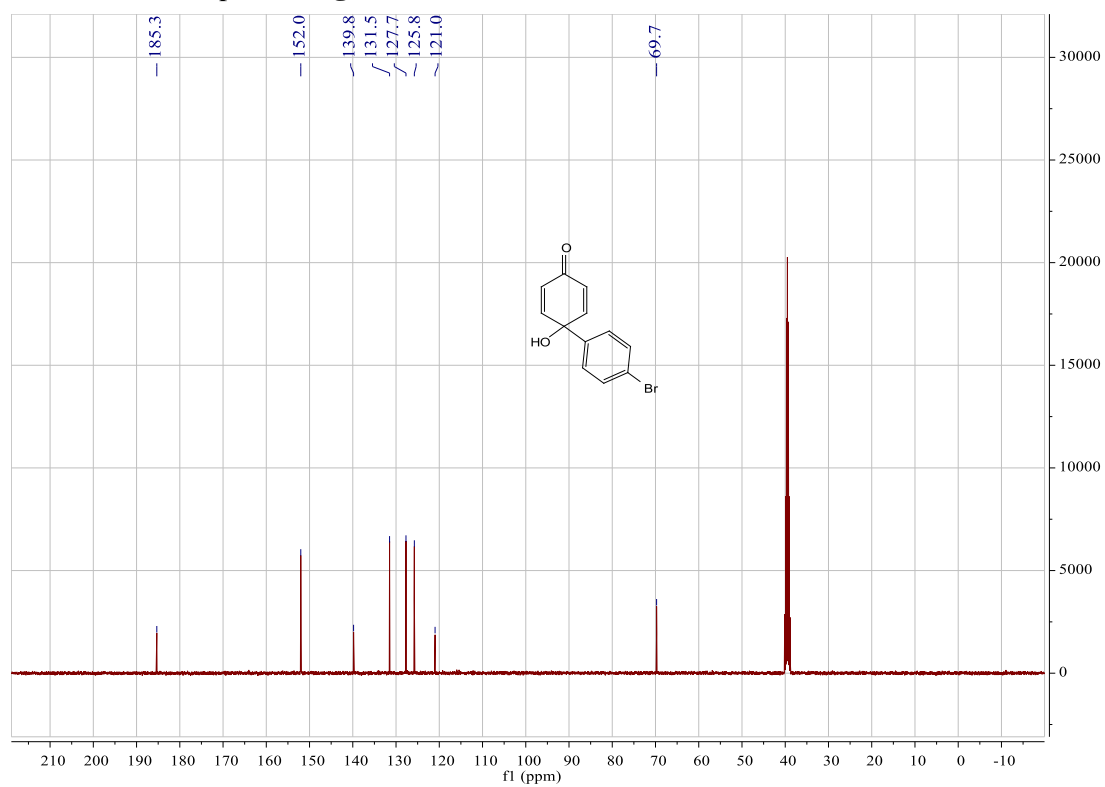

### <sup>1</sup>H NMR of compound **3ah**

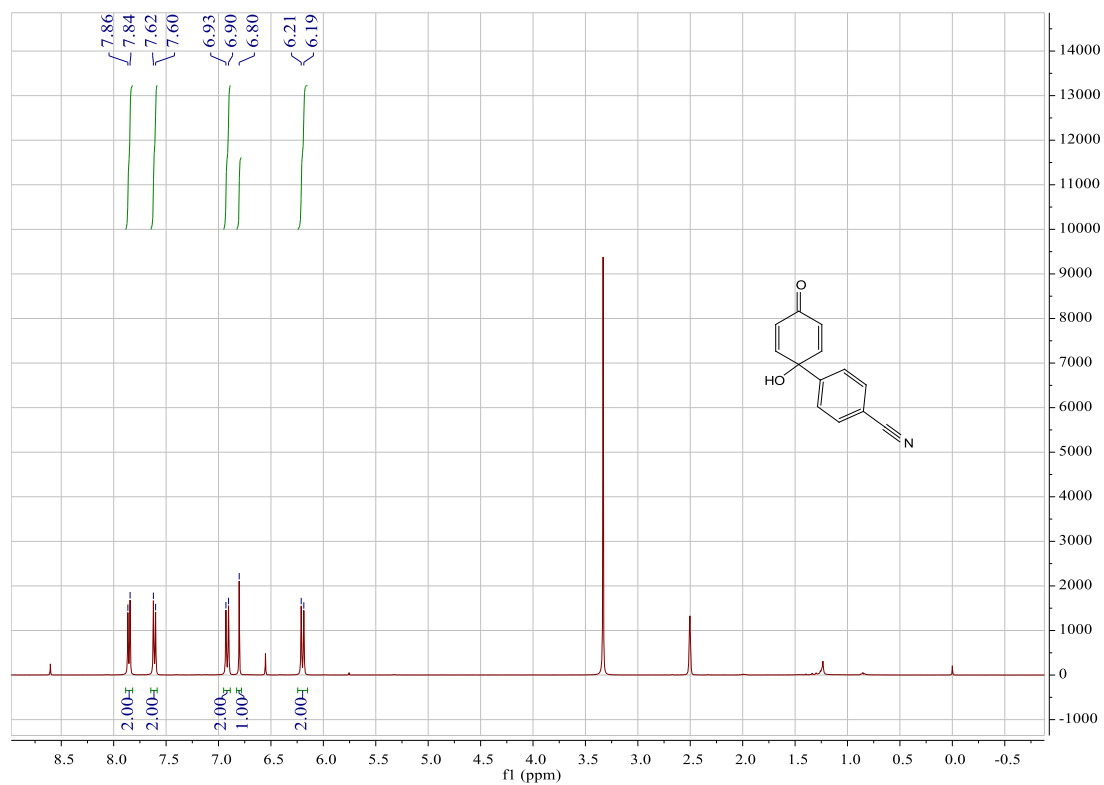

### <sup>13</sup>C NMR of compound **3ah**

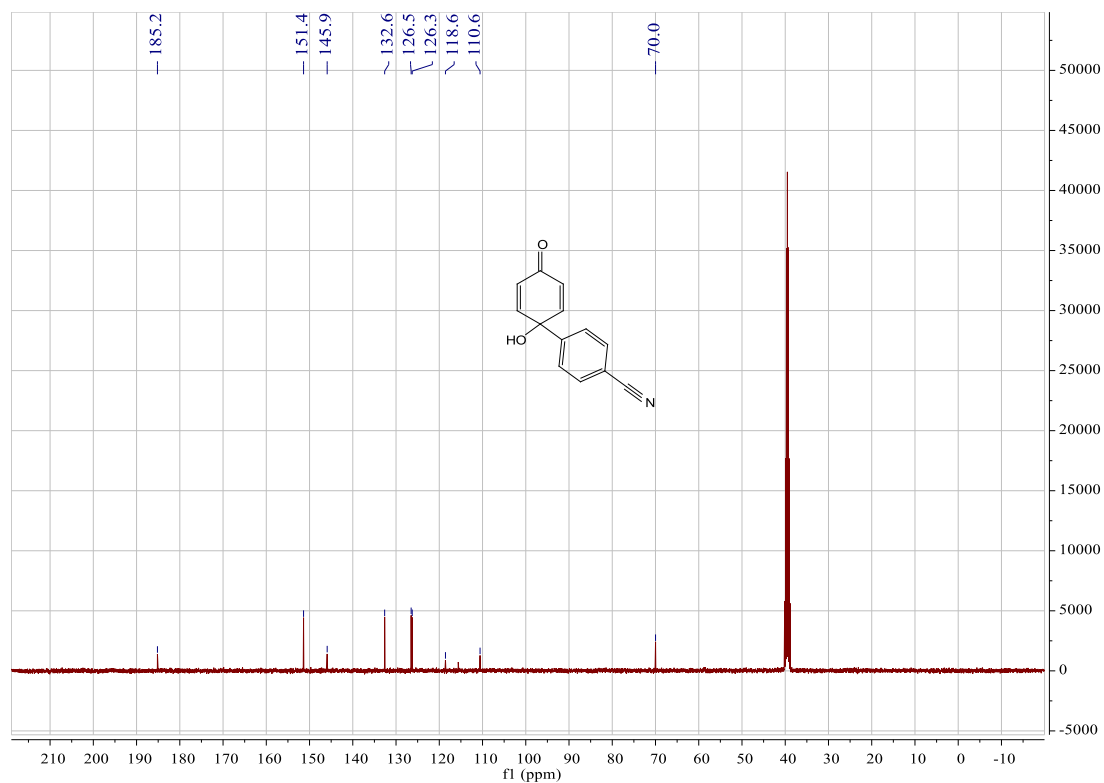

### <sup>1</sup>H NMR of compound **3ai**

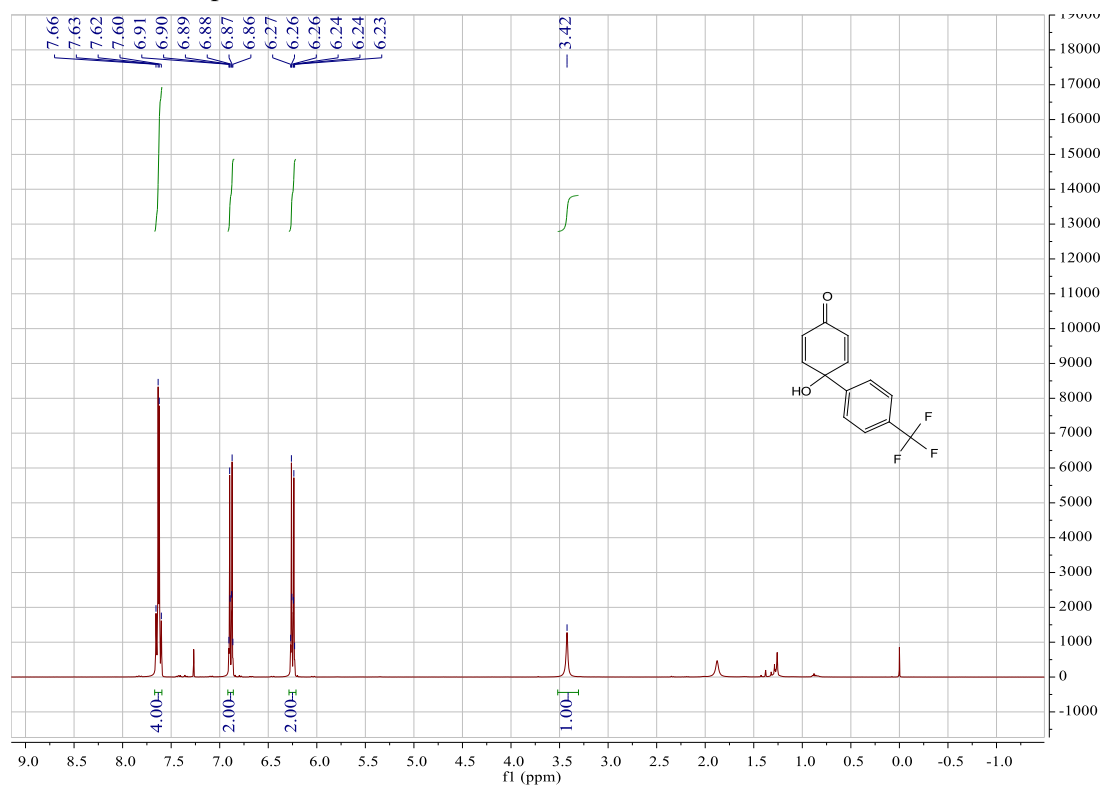

### <sup>13</sup>C NMR of compound **3ai**

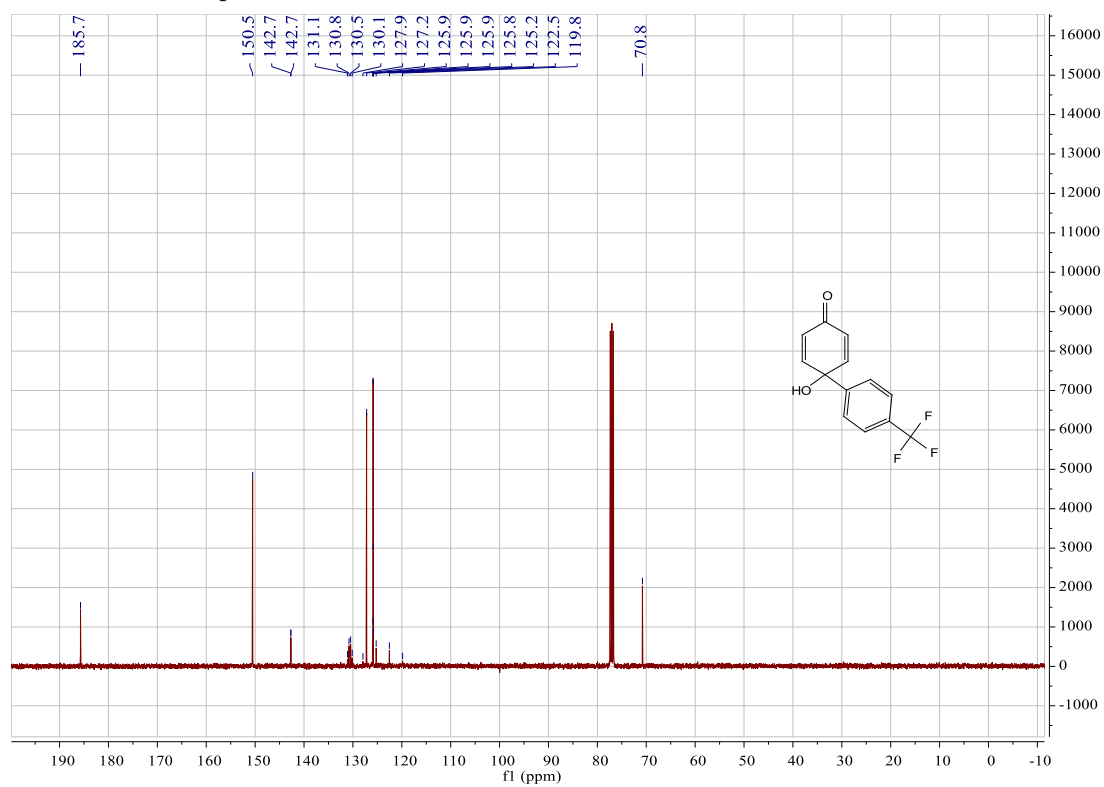



<sup>1</sup>H NMR of compound **3aj**

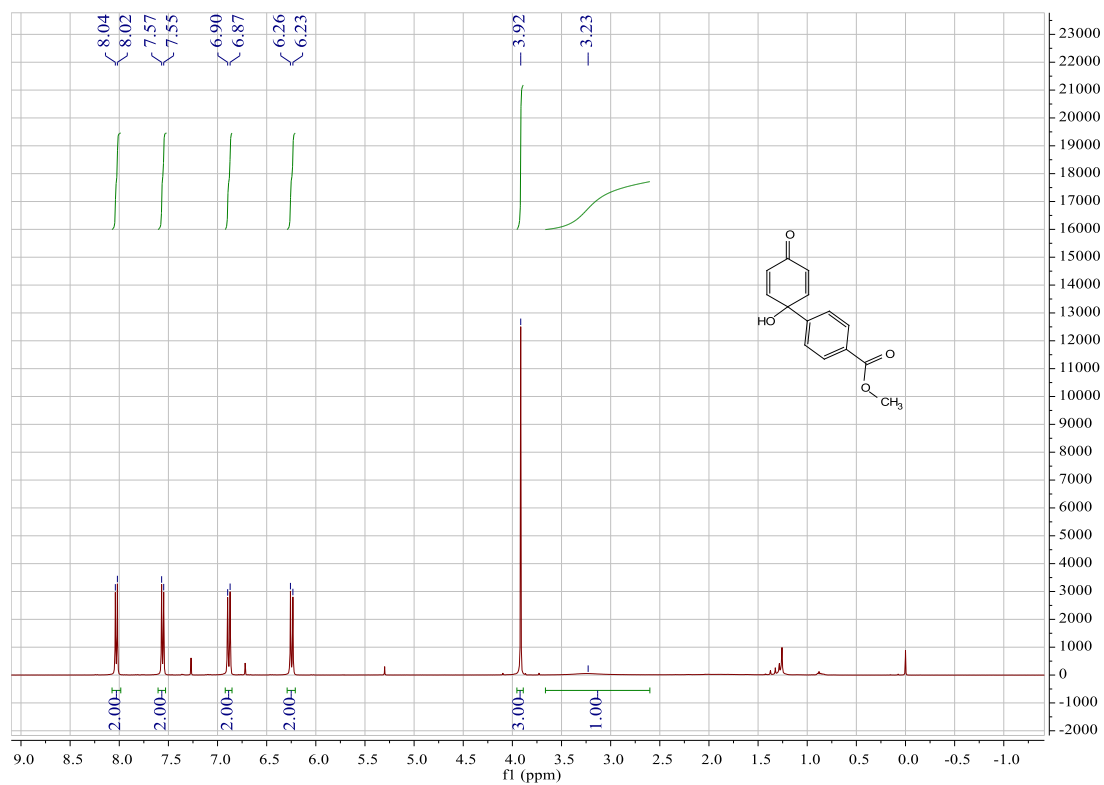

<sup>13</sup>C NMR of compound **3aj**

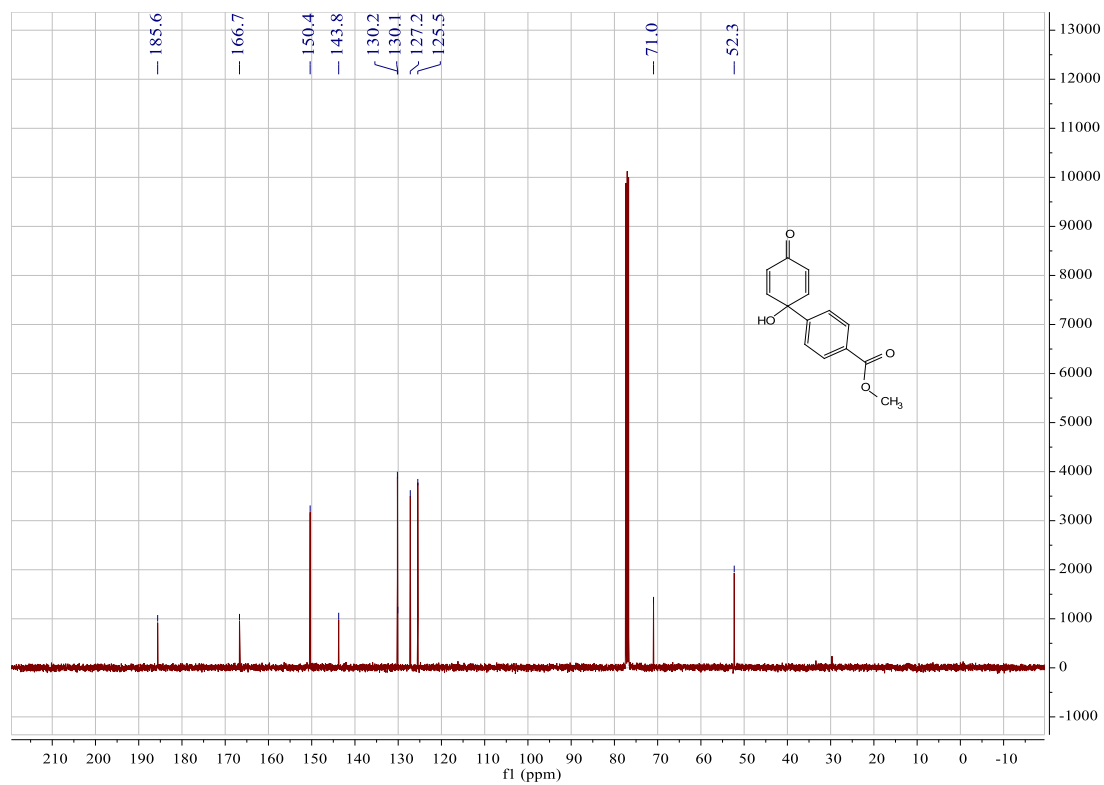

### <sup>1</sup>H NMR of compound **3ak**

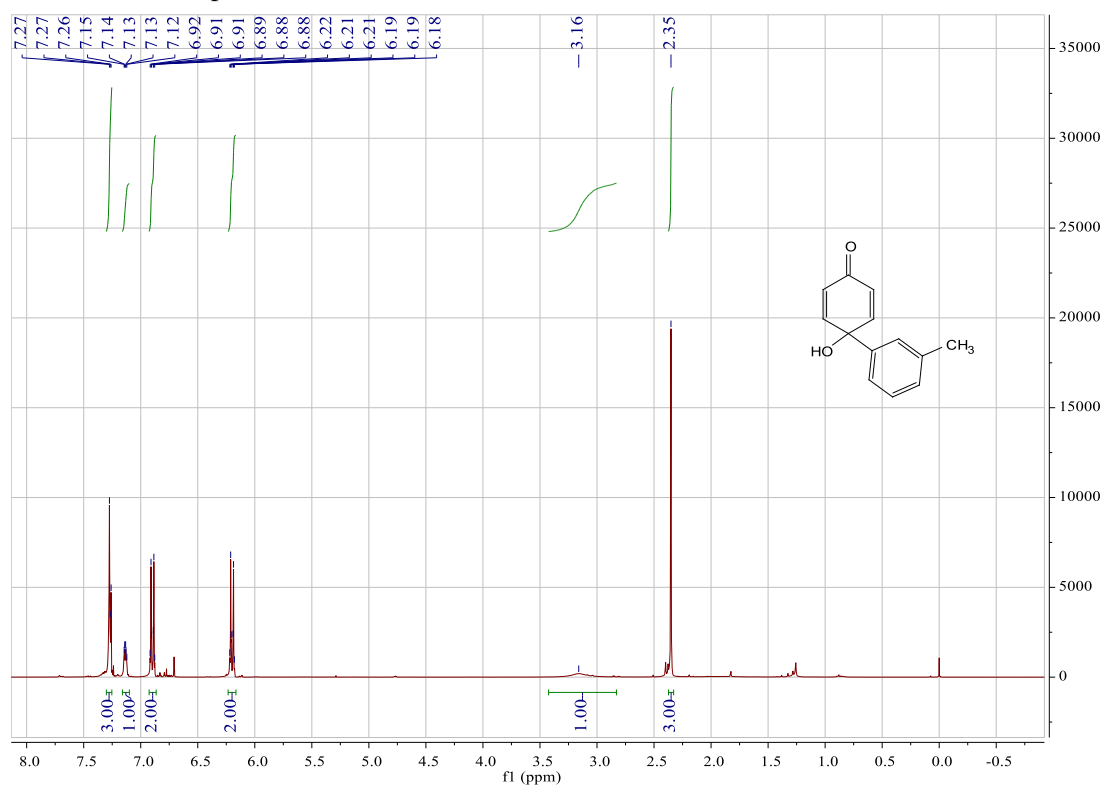

### <sup>13</sup>C NMR of compound **3ak**

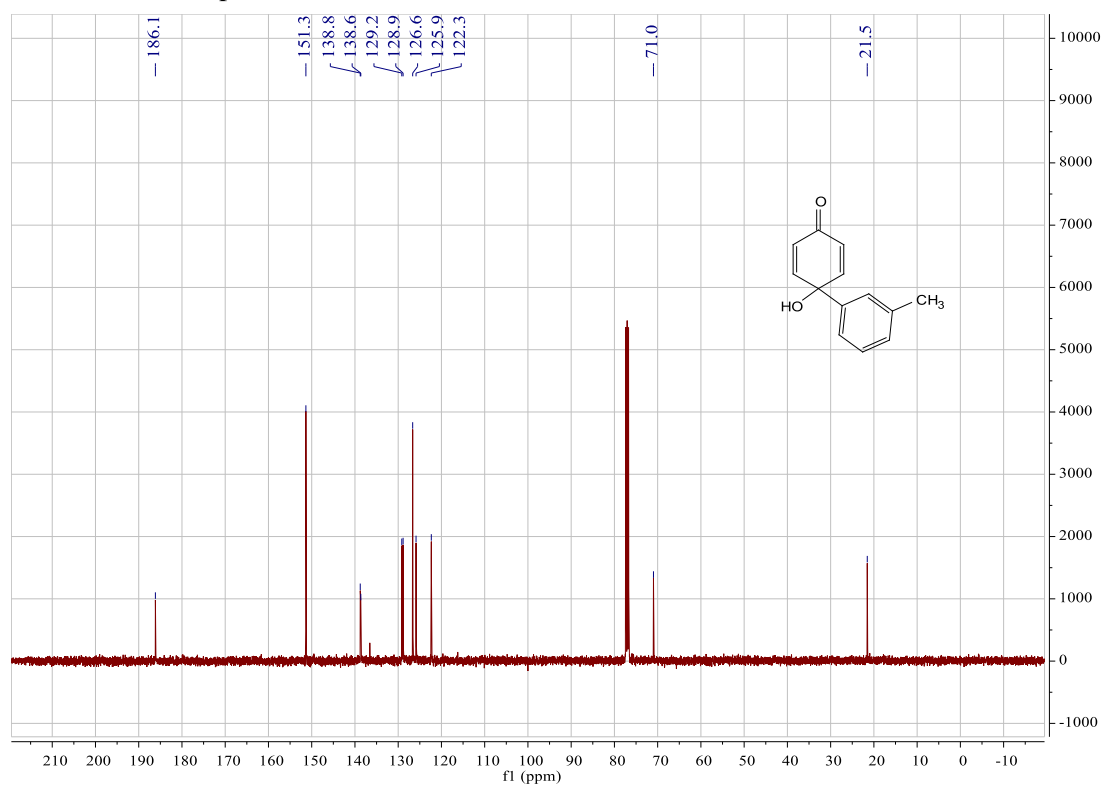

### <sup>1</sup>H NMR of compound **3al**

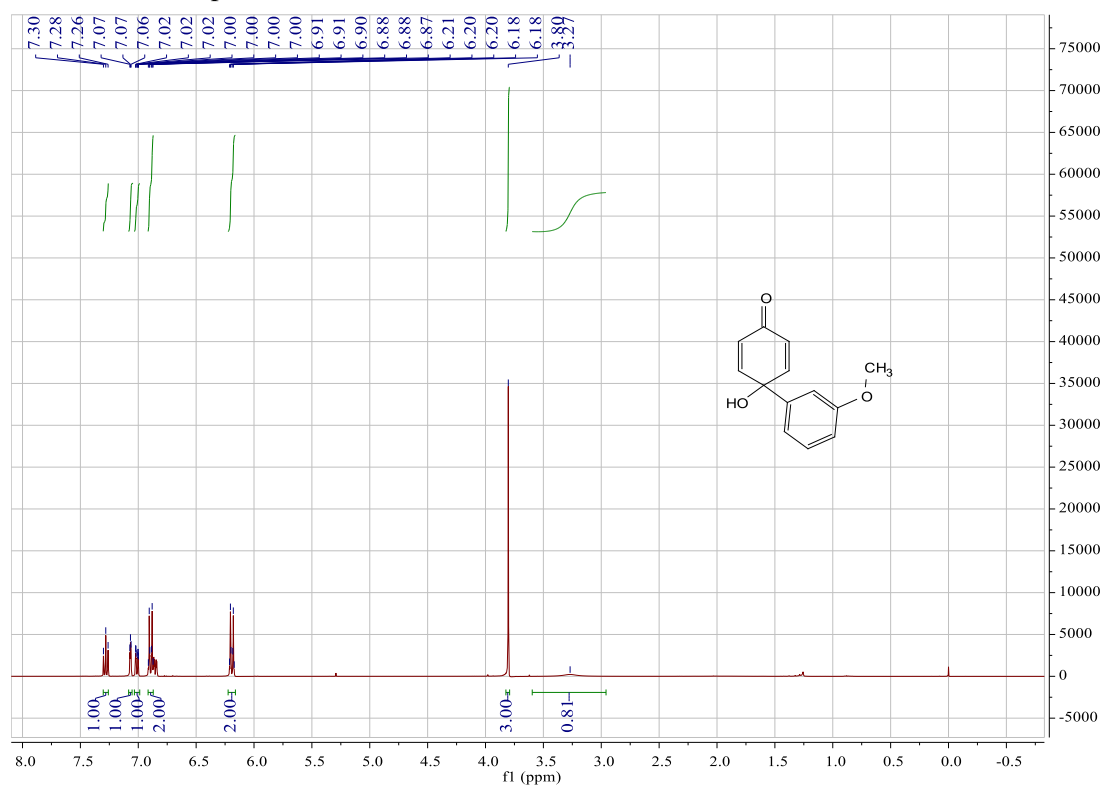

### <sup>13</sup>C NMR of compound **3al**

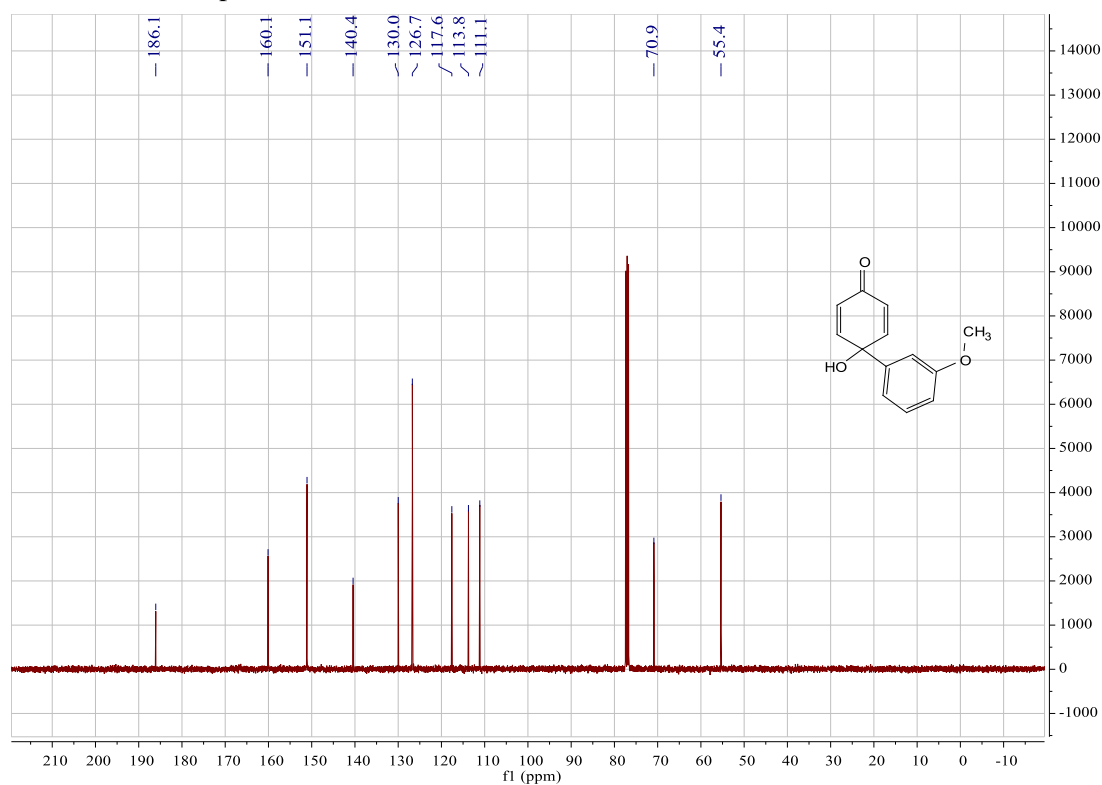

### <sup>1</sup>H NMR of compound **3am**

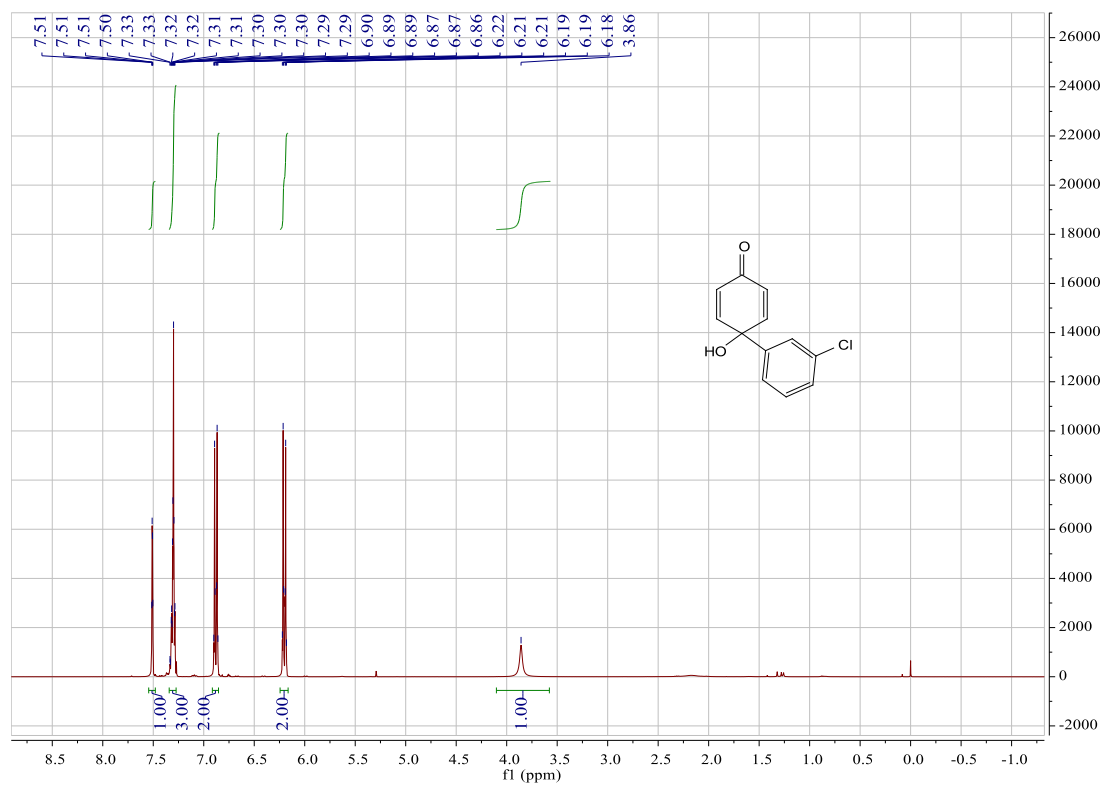

### <sup>13</sup>C NMR of compound **3am**

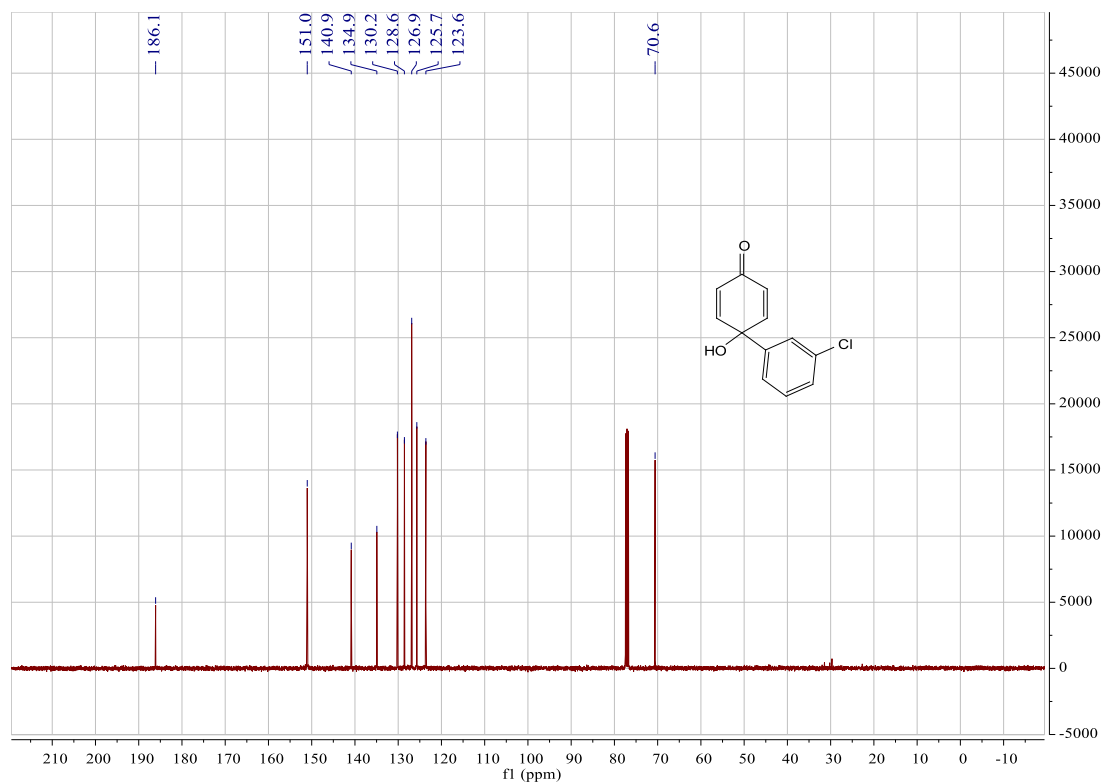

### <sup>1</sup>H NMR of compound **3an**

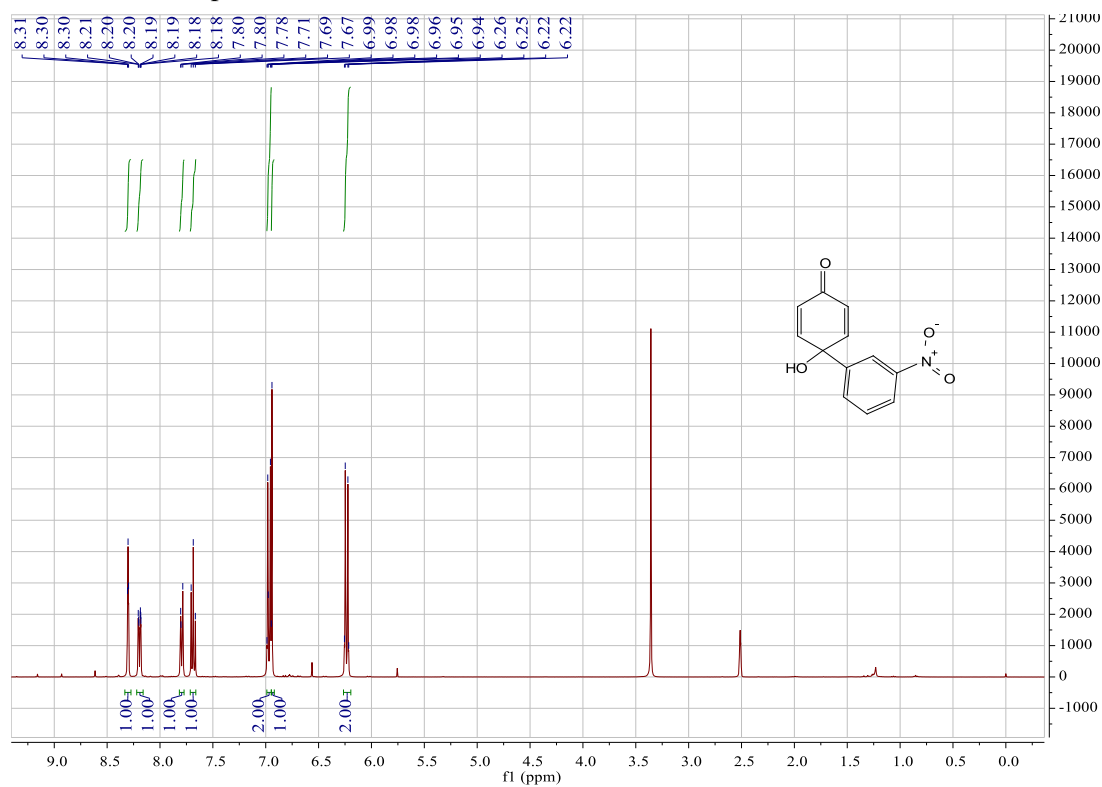

### <sup>13</sup>C NMR of compound **3an**

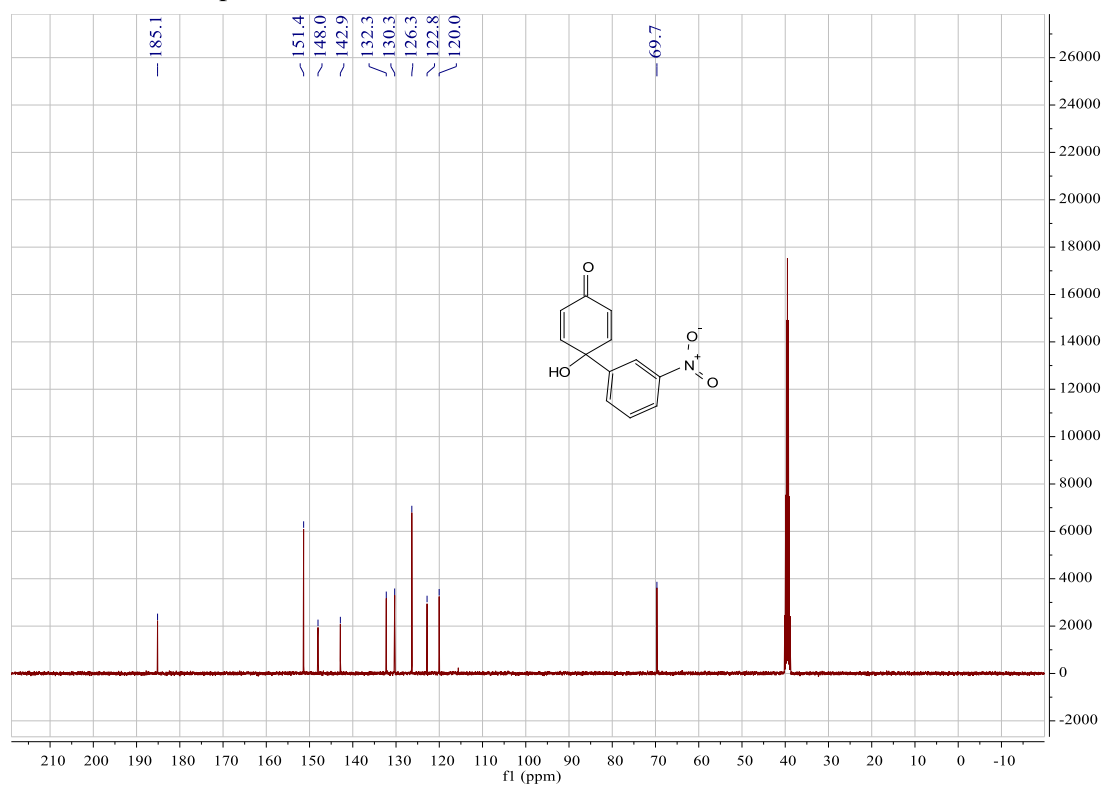

### <sup>1</sup>H NMR of compound **3ao**

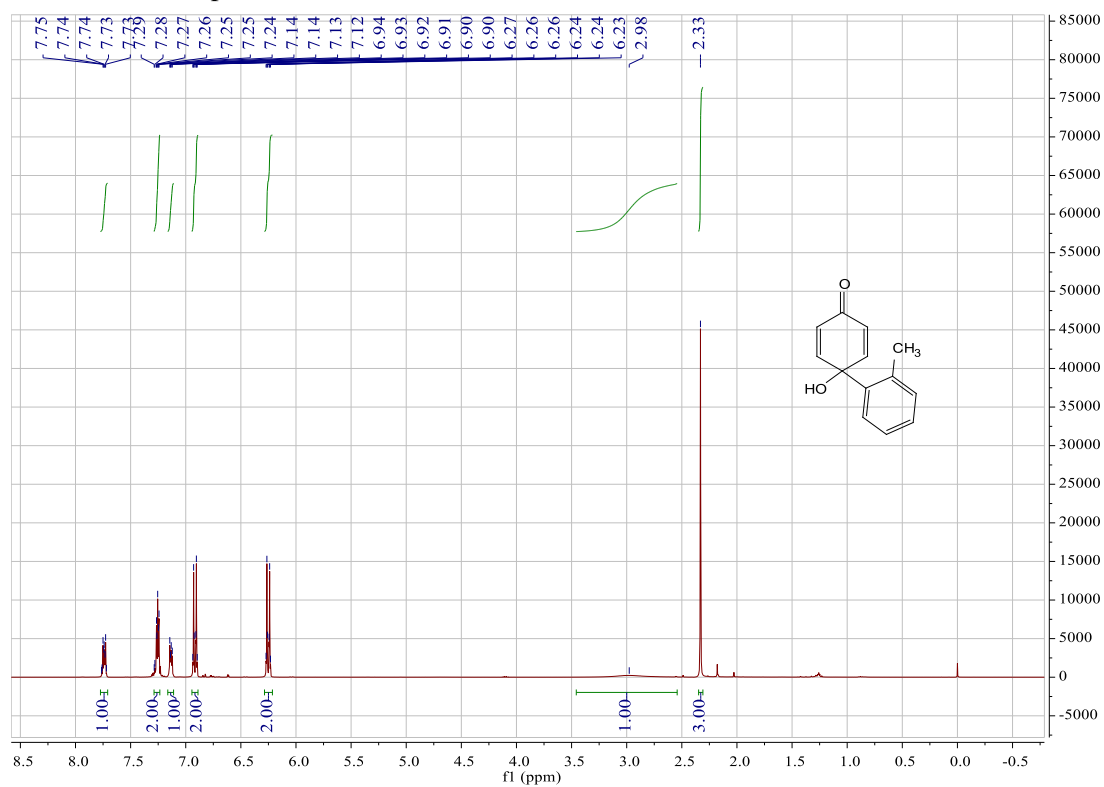

### <sup>13</sup>C NMR of compound **3ao**

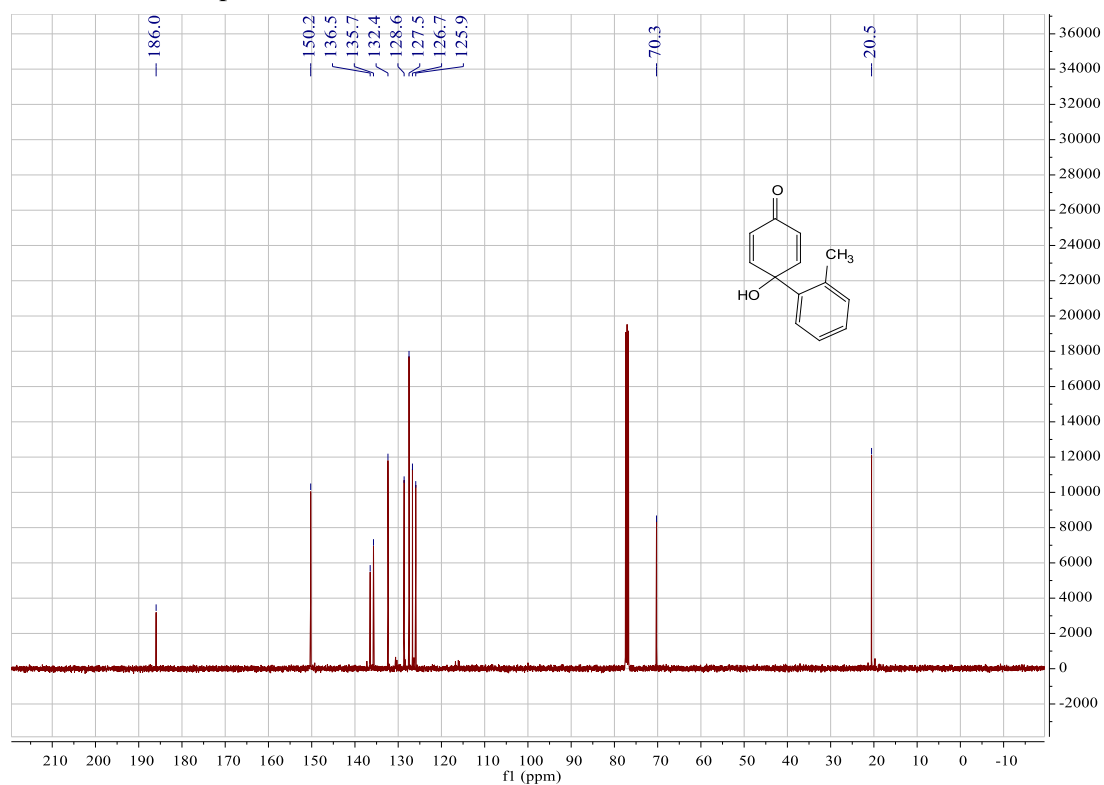

<sup>1</sup>H NMR of compound **3ap**

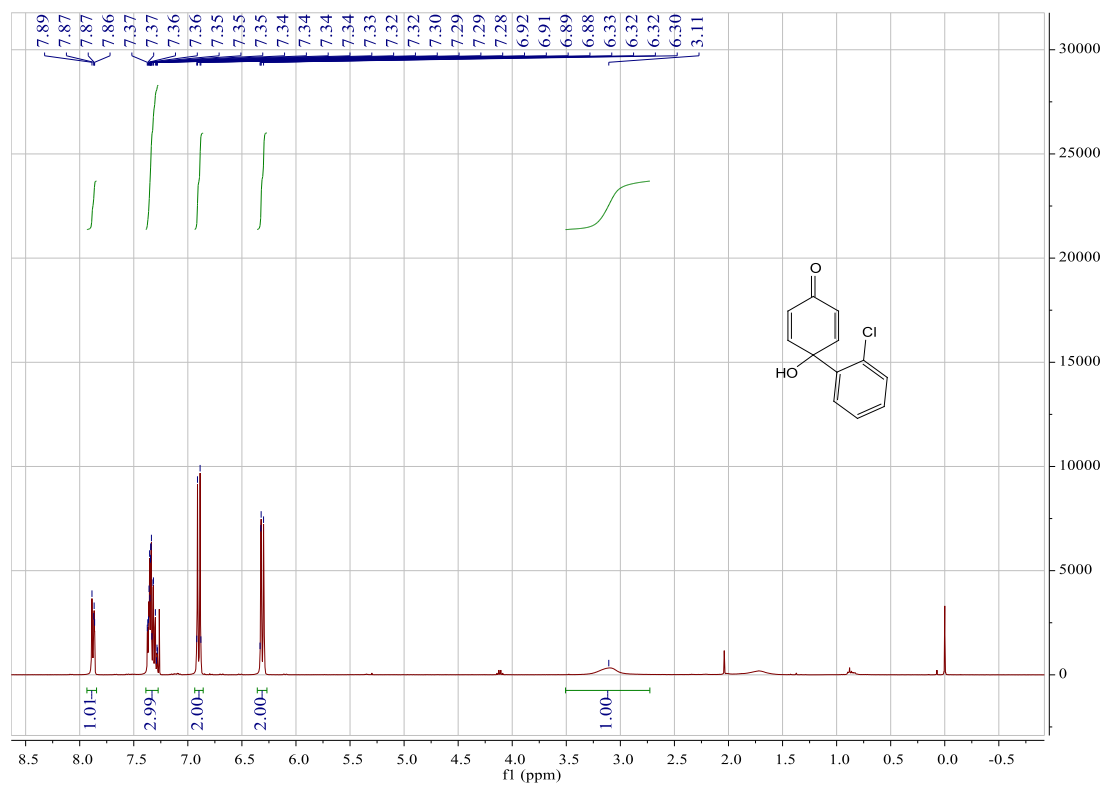

<sup>13</sup>C NMR of compound **3ap**

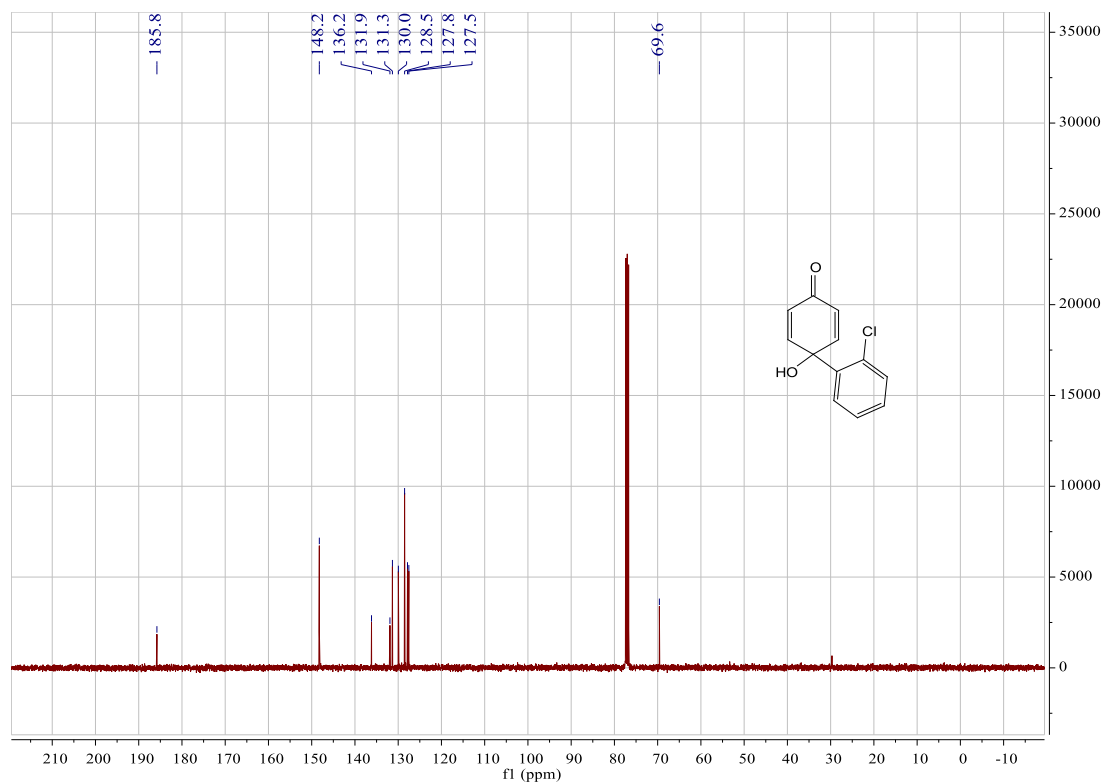

### <sup>1</sup>H NMR of compound **3aq**

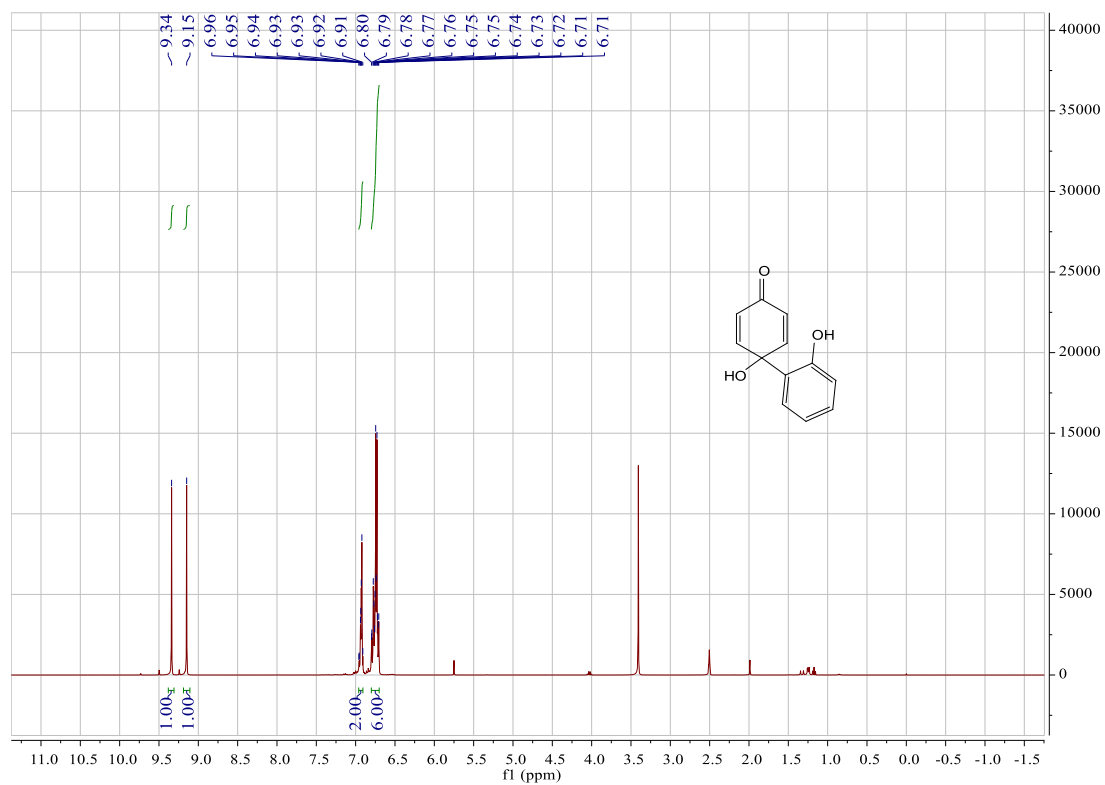

### <sup>13</sup>C NMR of compound **3aq**

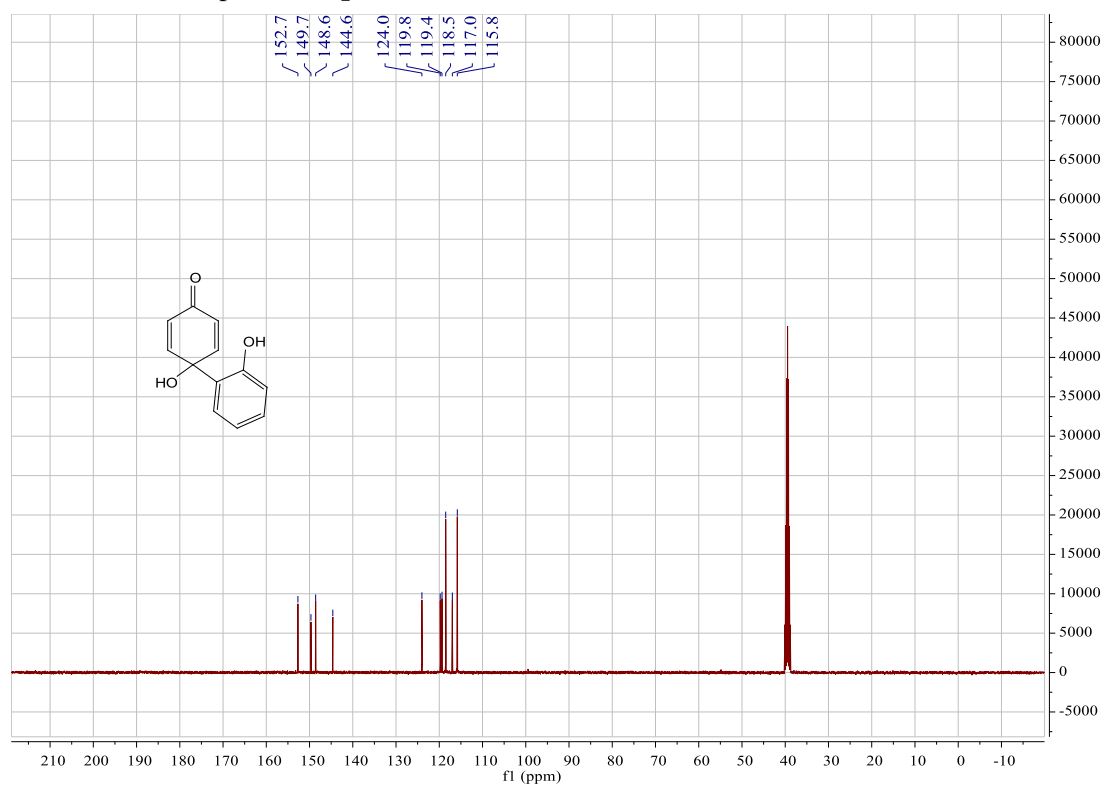



### <sup>1</sup>H NMR of compound **3ar**

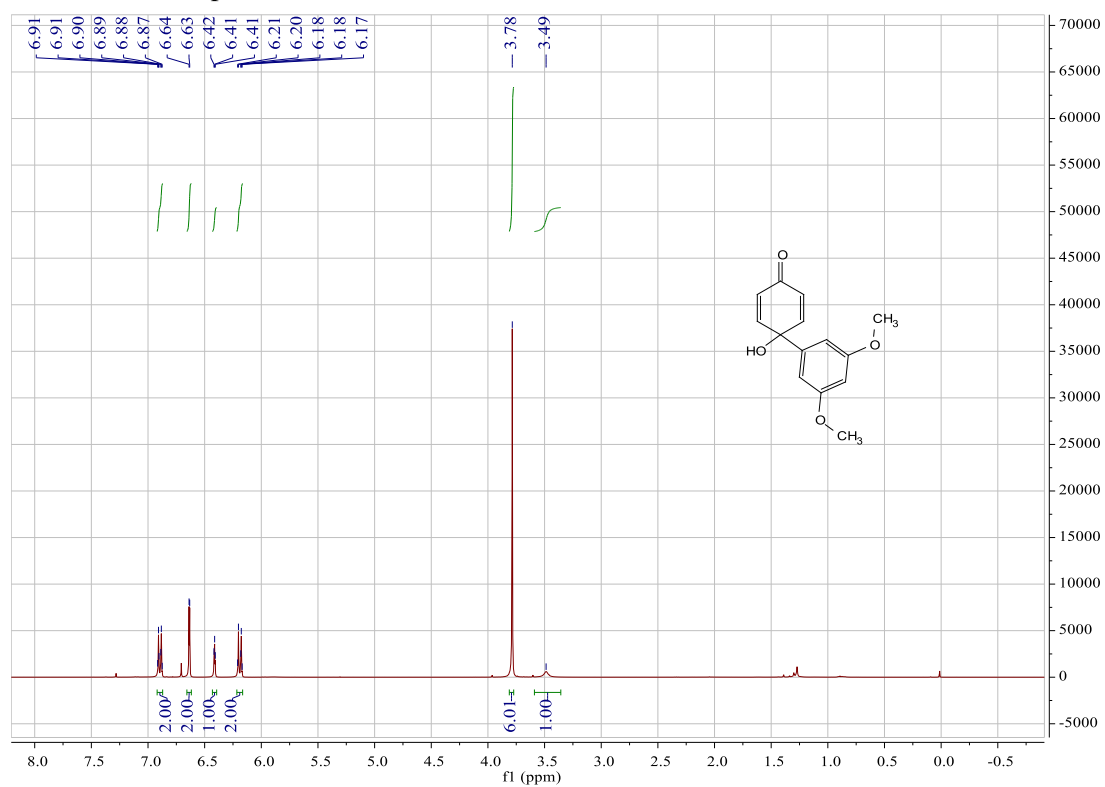

### <sup>13</sup>C NMR of compound **3ar**

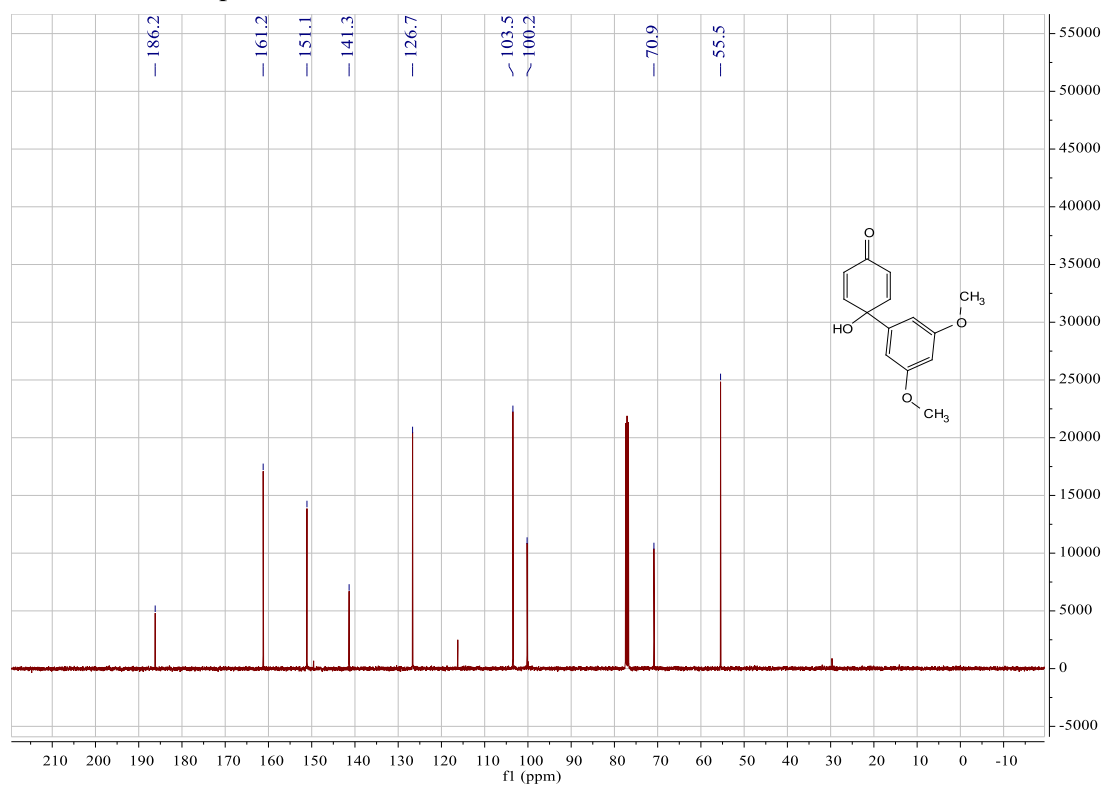

<sup>1</sup>H NMR of compound **3as**

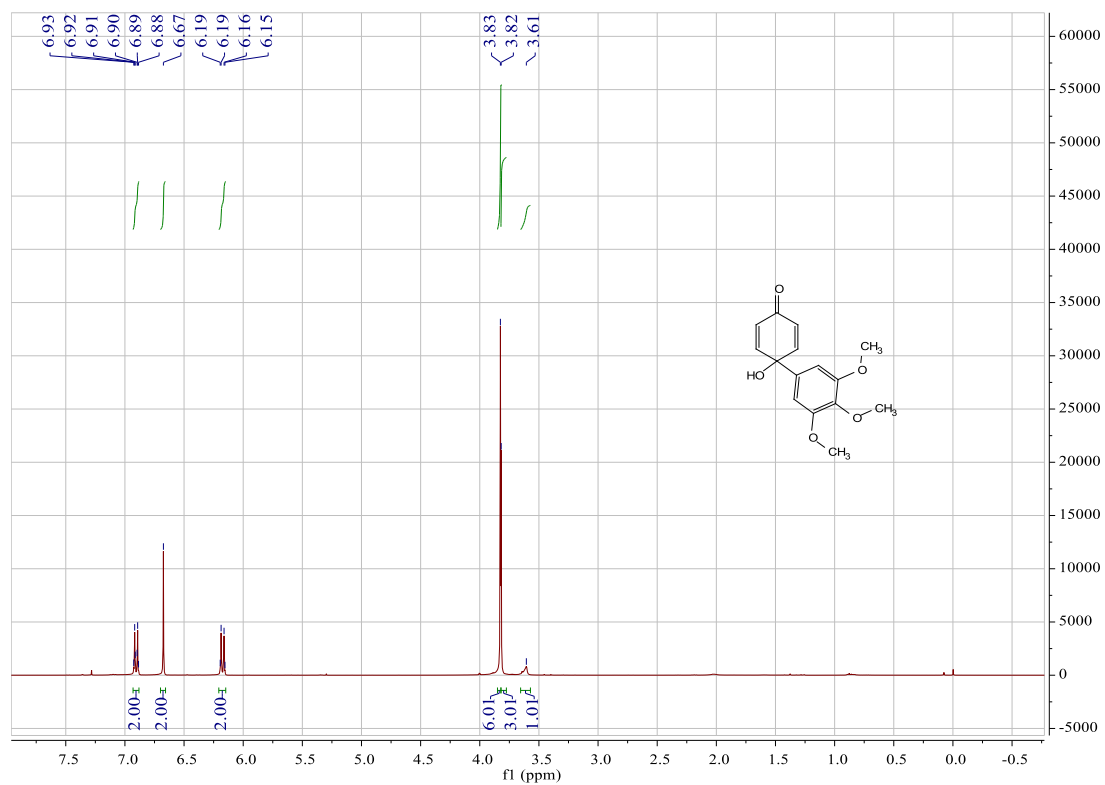

<sup>13</sup>C NMR of compound **3as**

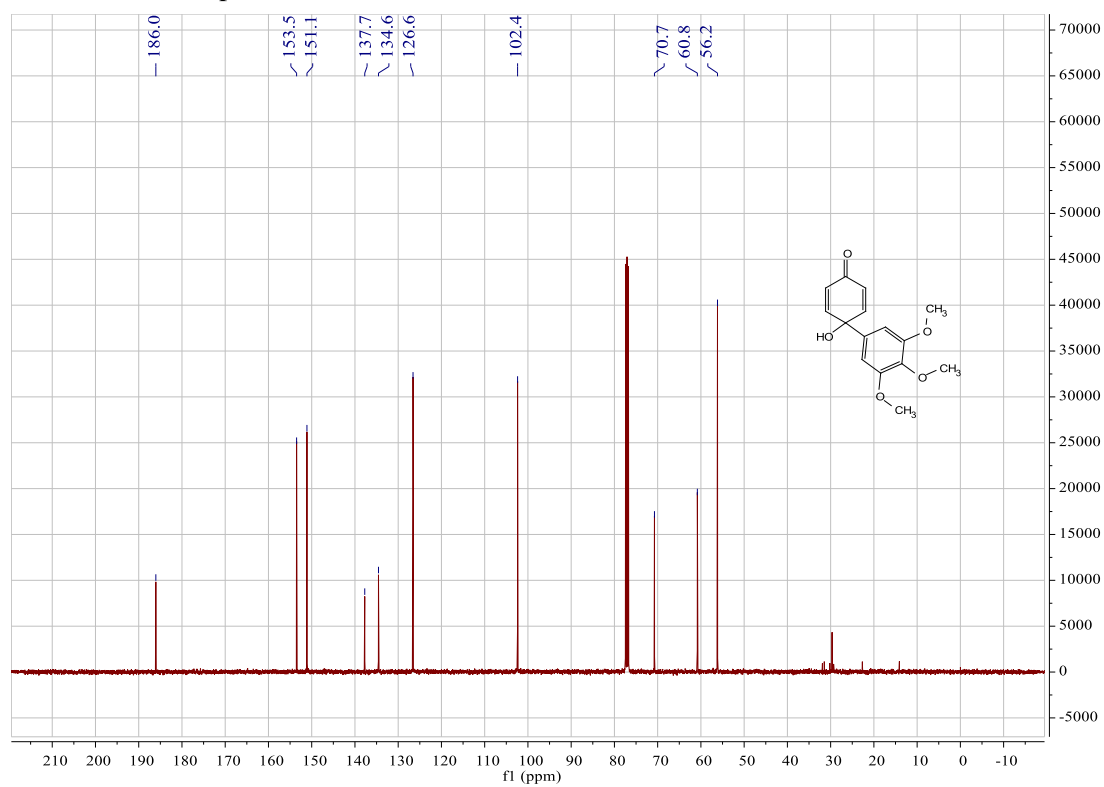

### <sup>1</sup>H NMR of compound **3at**

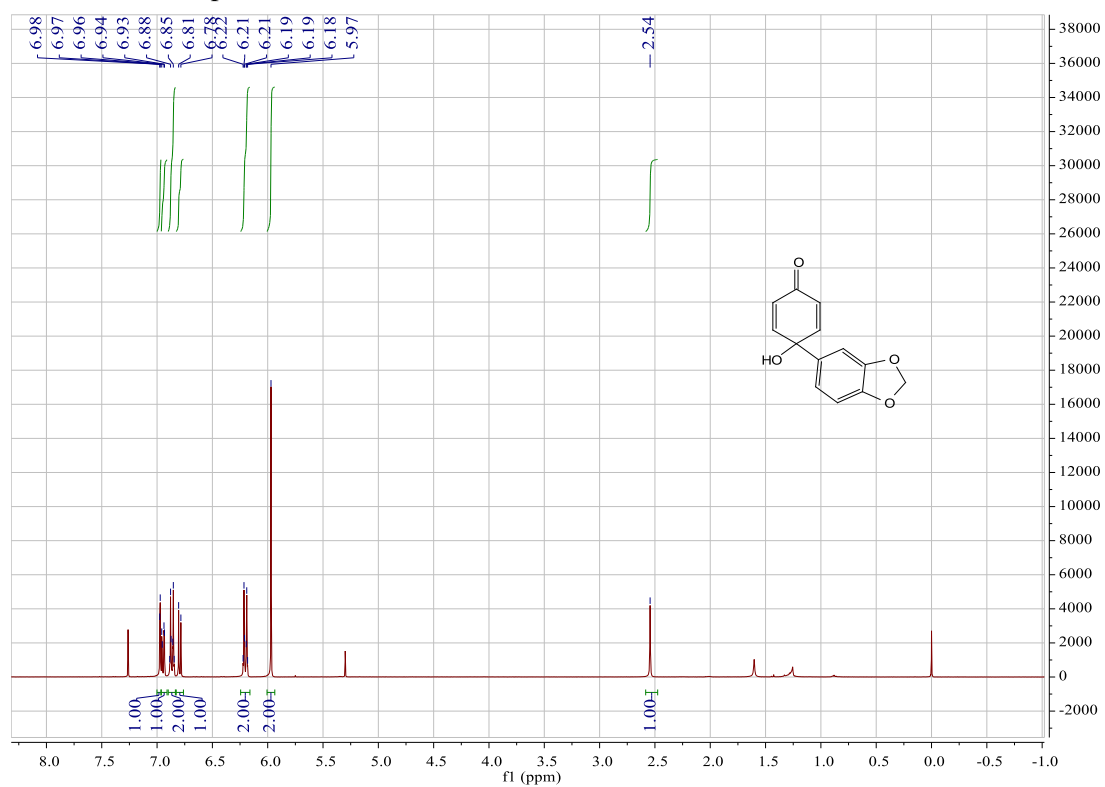

### <sup>13</sup>C NMR of compound **3at**

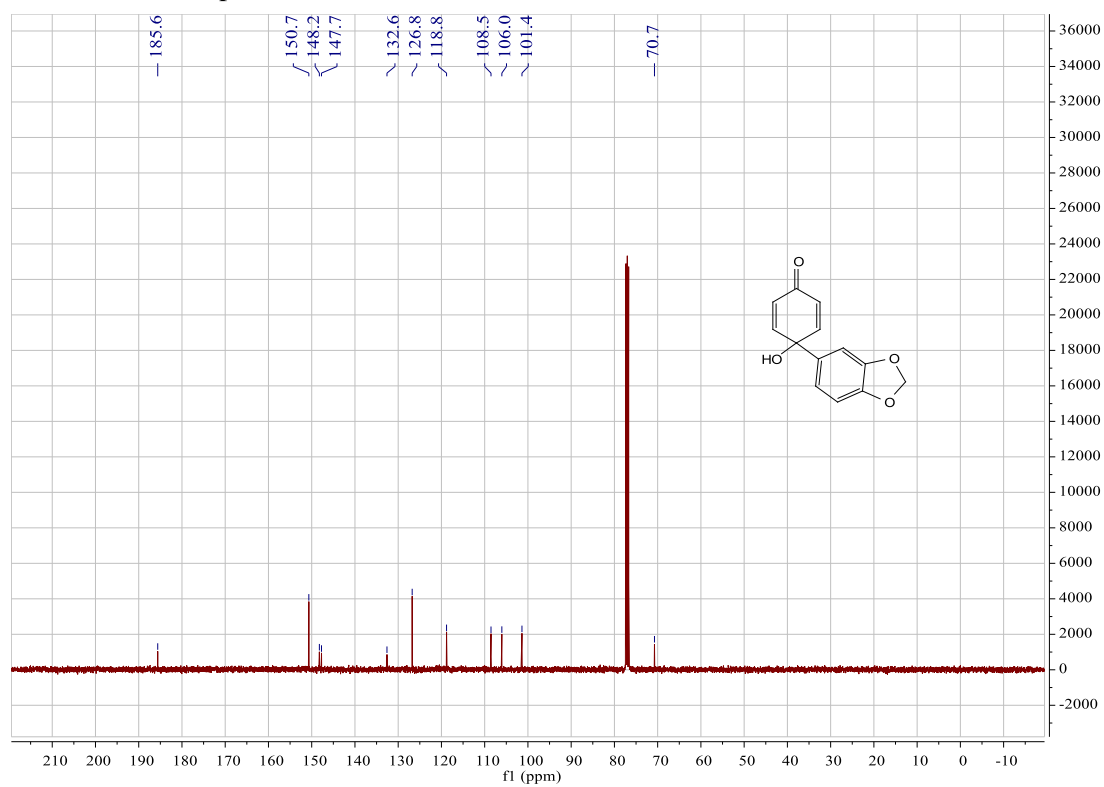

### <sup>1</sup>H NMR of compound **3au**

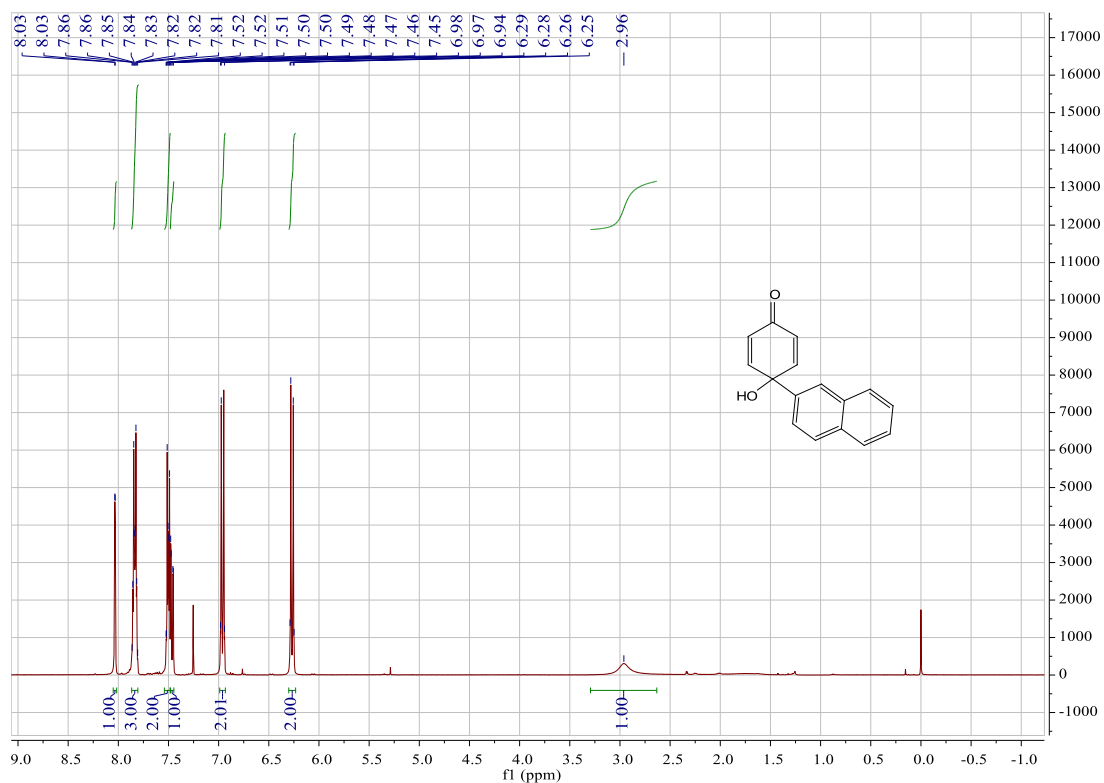

### <sup>13</sup>C NMR of compound **3au**

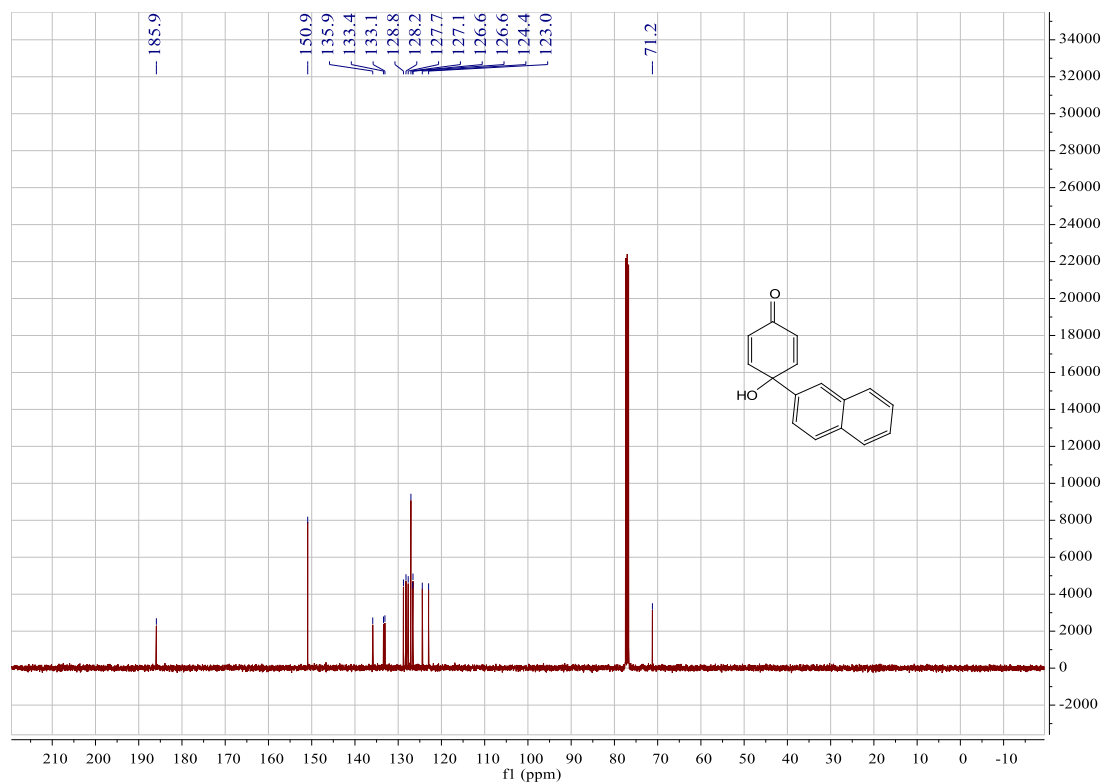

<sup>1</sup>H NMR of compound **3ba**

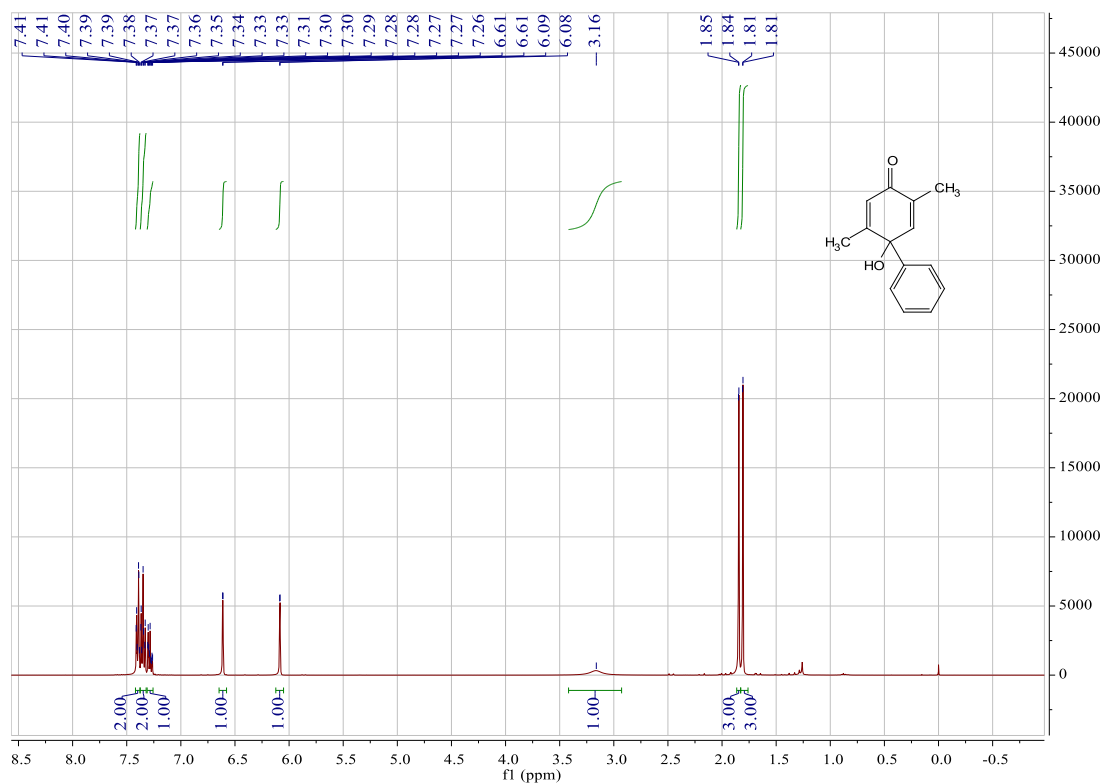

<sup>13</sup>C NMR of compound **3ba**

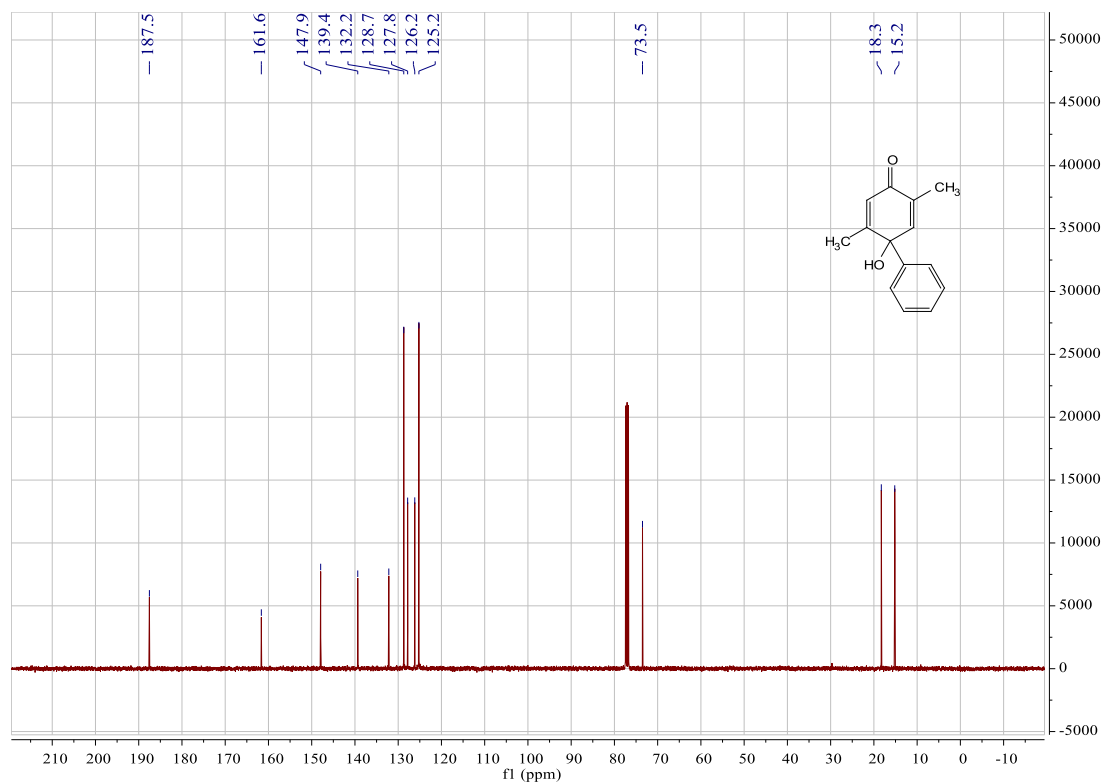

<sup>1</sup>H NMR of compound **3ca**

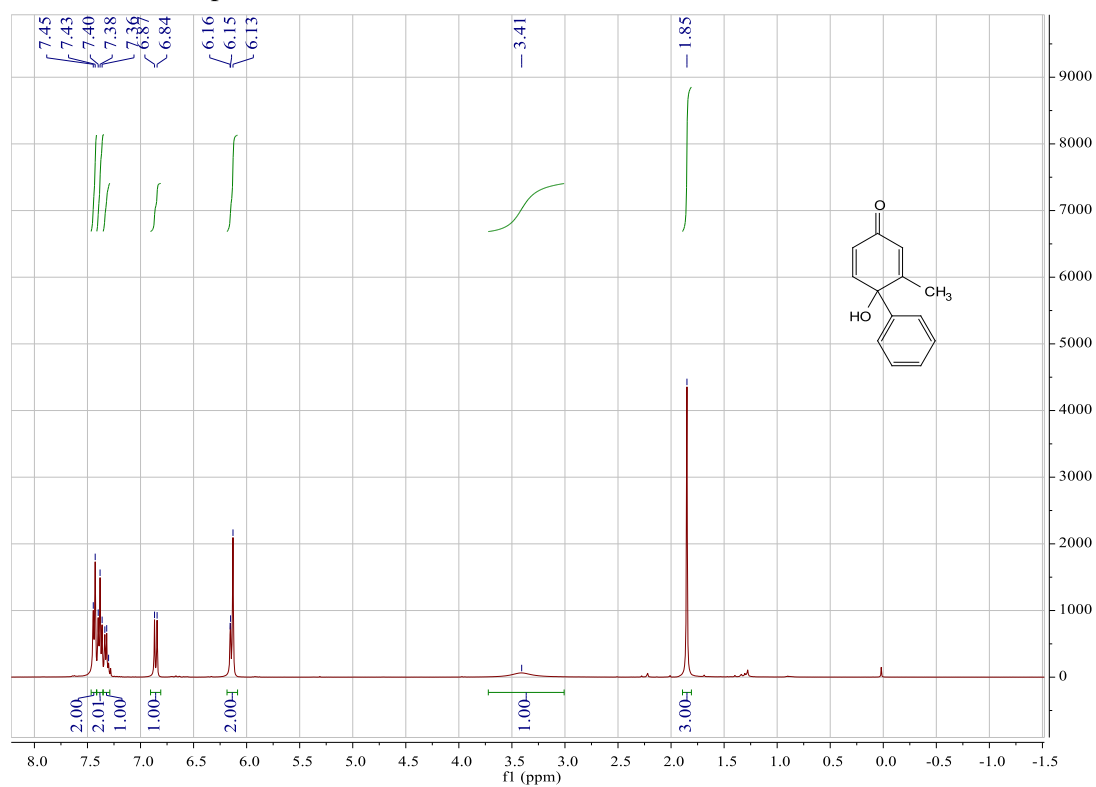

<sup>13</sup>C NMR of compound **3ca**

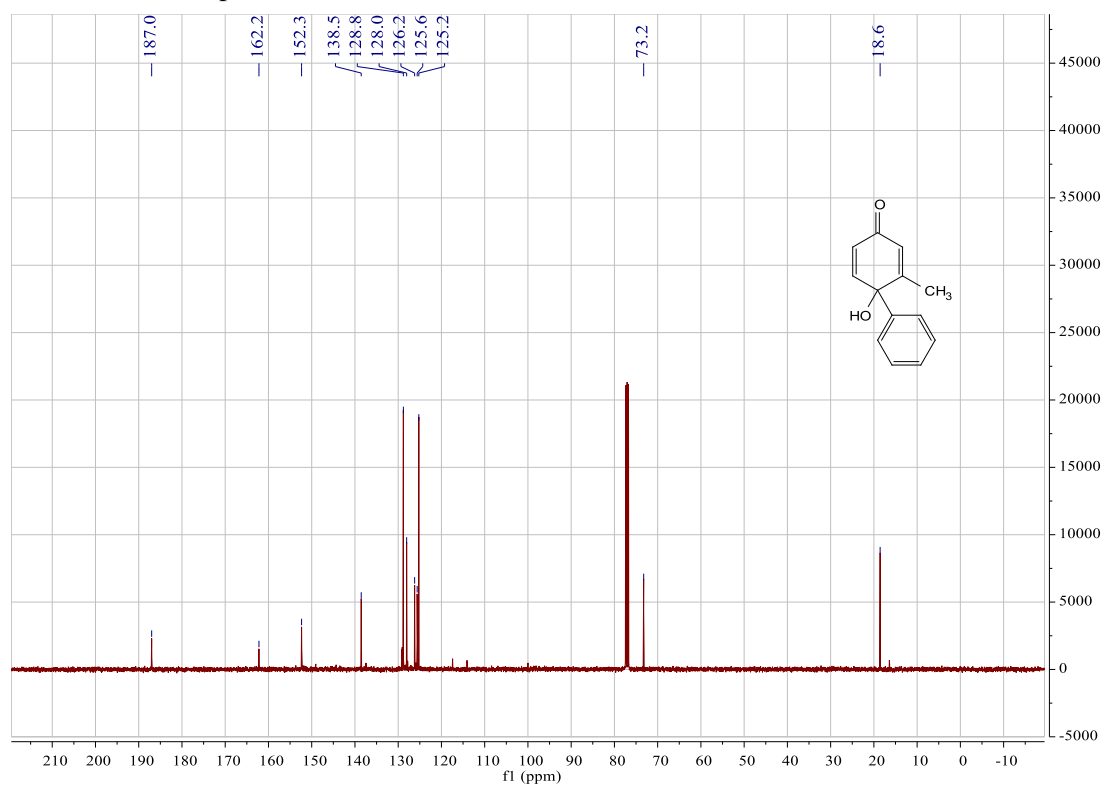

H-H NOEZY of compound **3ca**

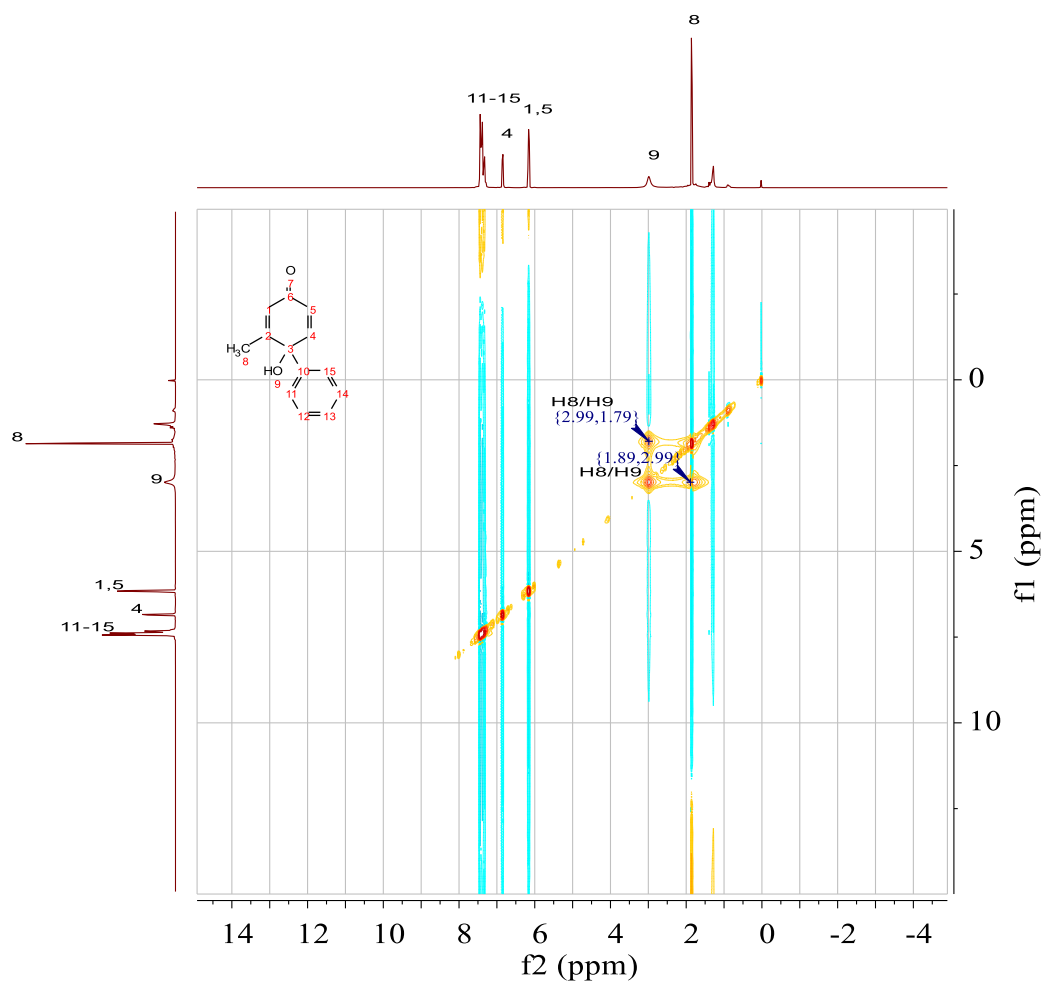

### <sup>1</sup>H NMR of compound 3da

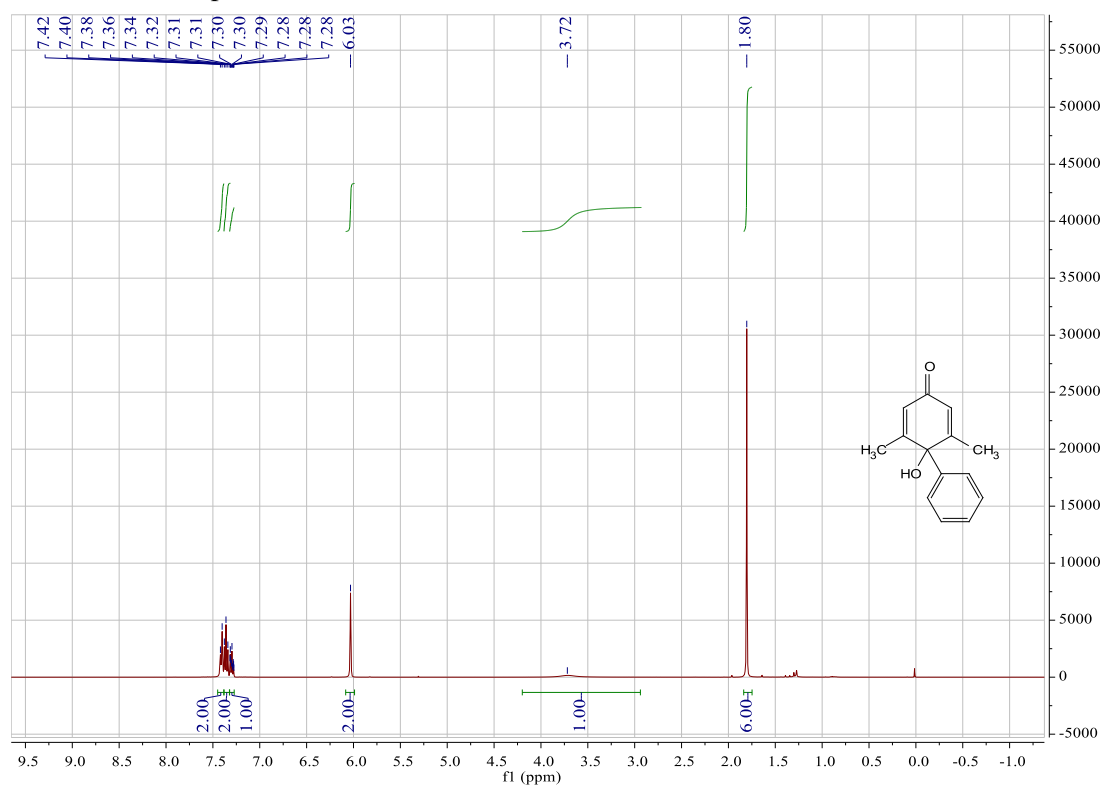

### <sup>13</sup>C NMR of compound 3da

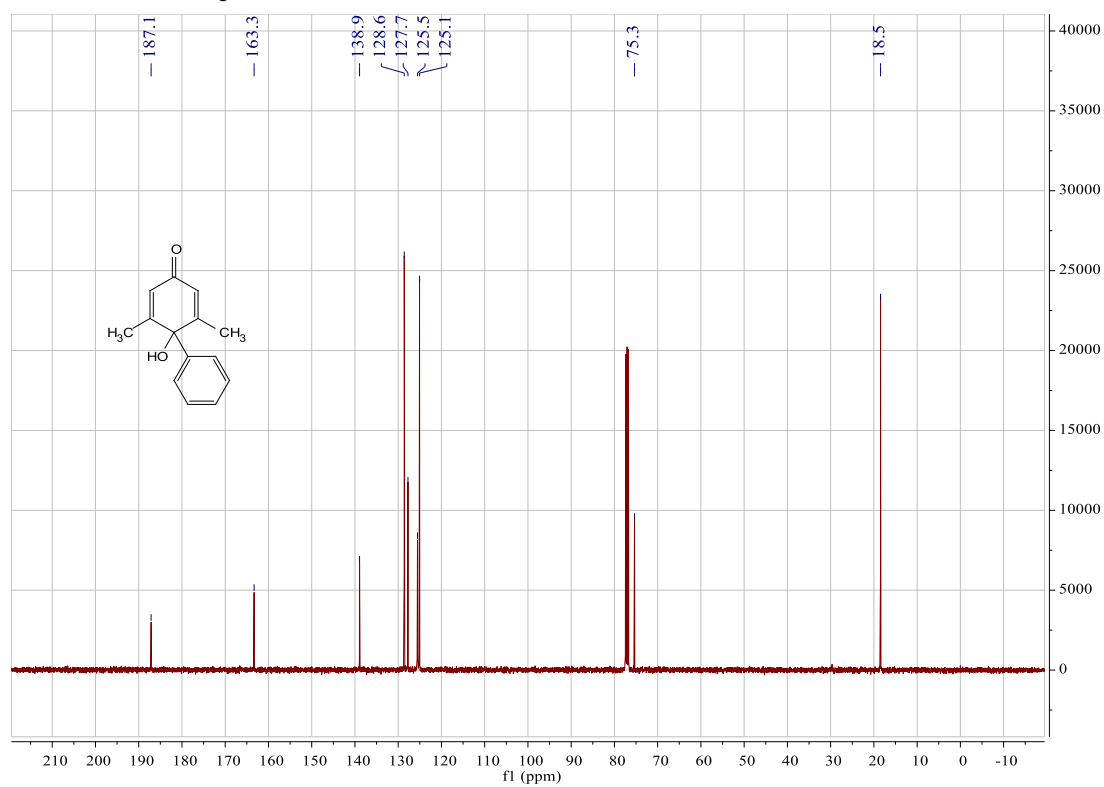



<sup>1</sup>H NMR of compound **3ea**

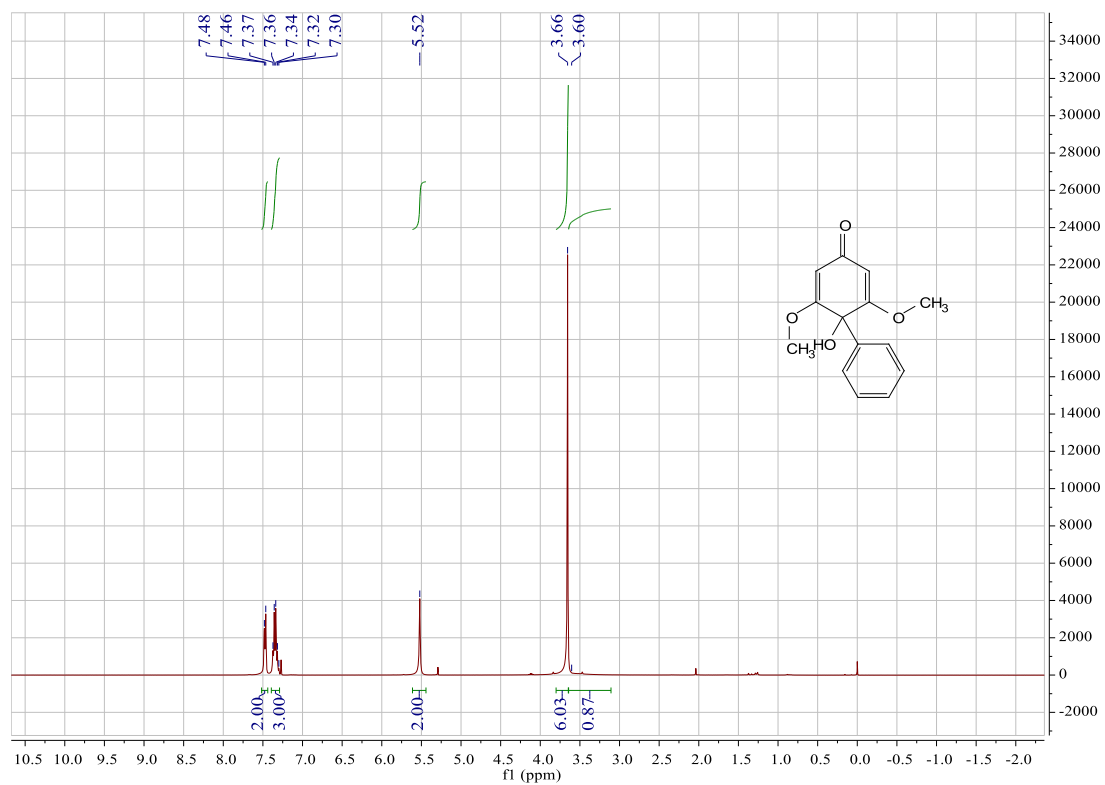

<sup>13</sup>C NMR of compound **3ea**

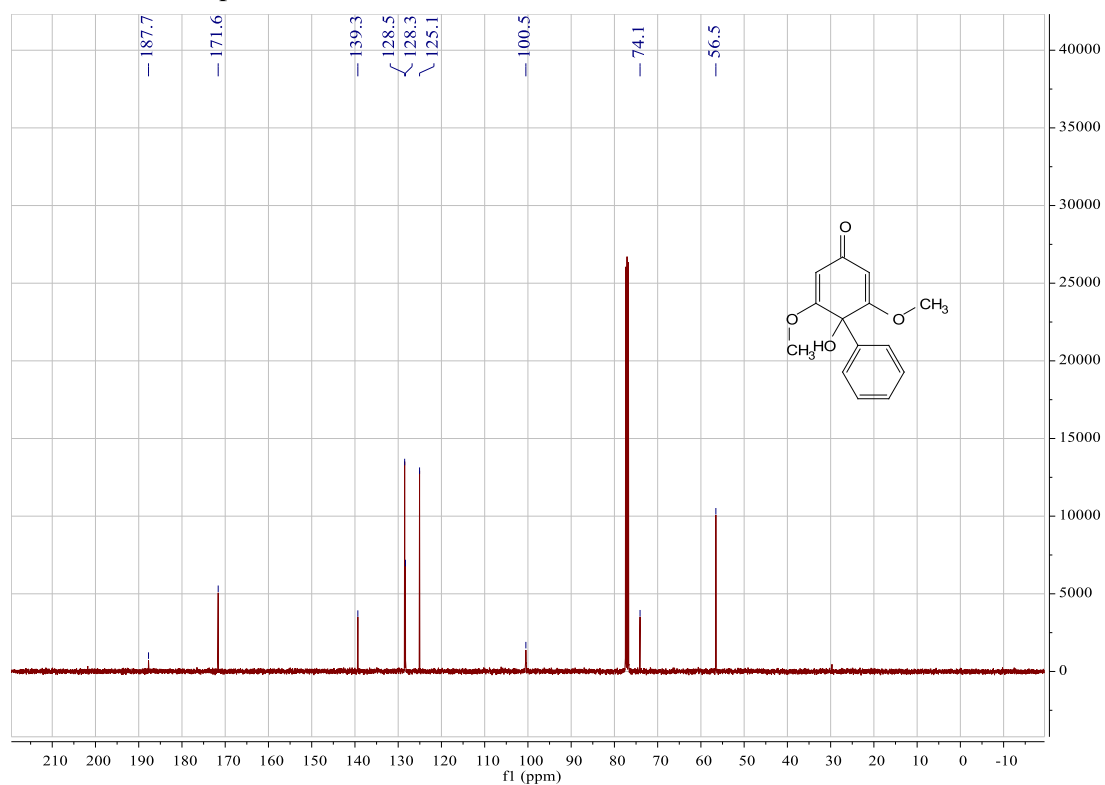

### <sup>1</sup>H NMR of compound **3ga**

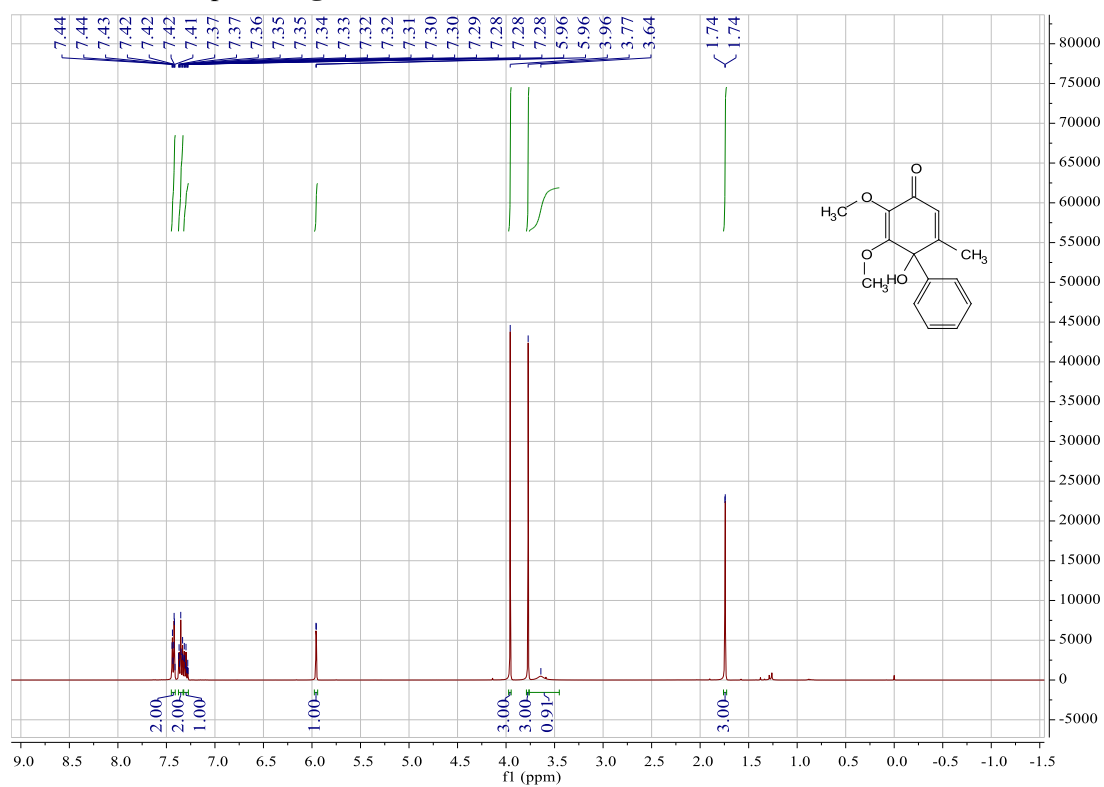

### <sup>13</sup>C NMR of compound **3ga**

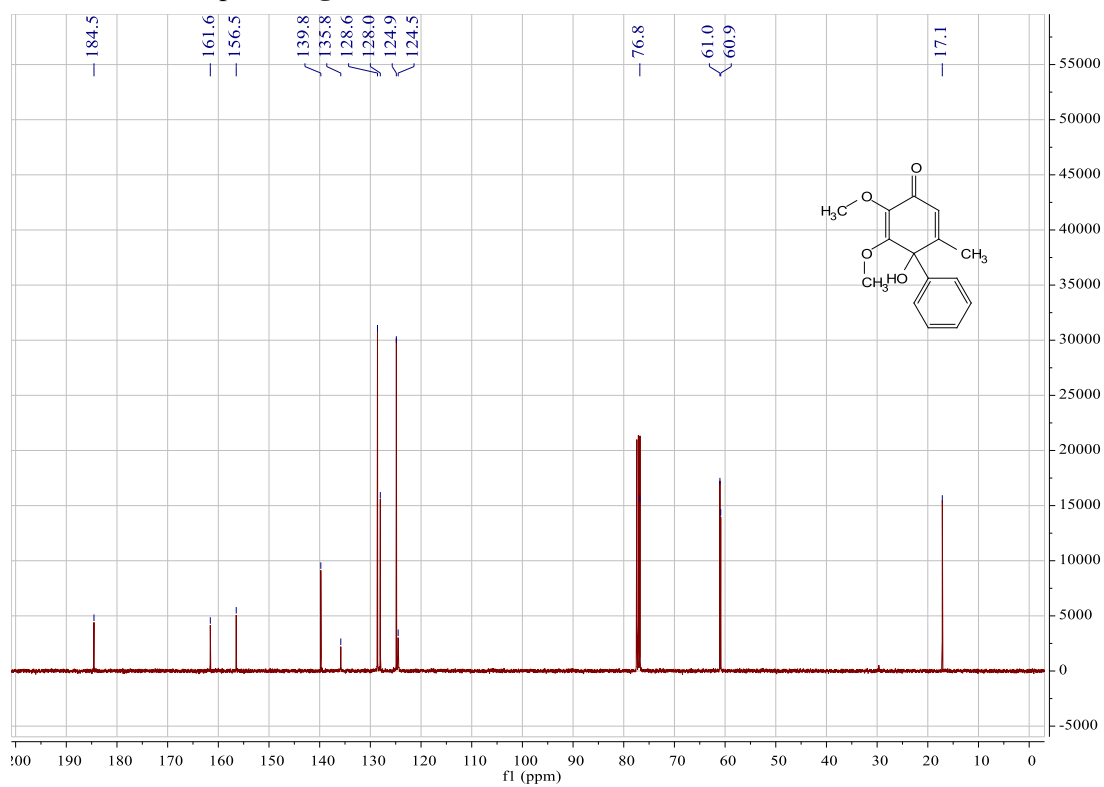

H-H NOEZY of compound **3ga**

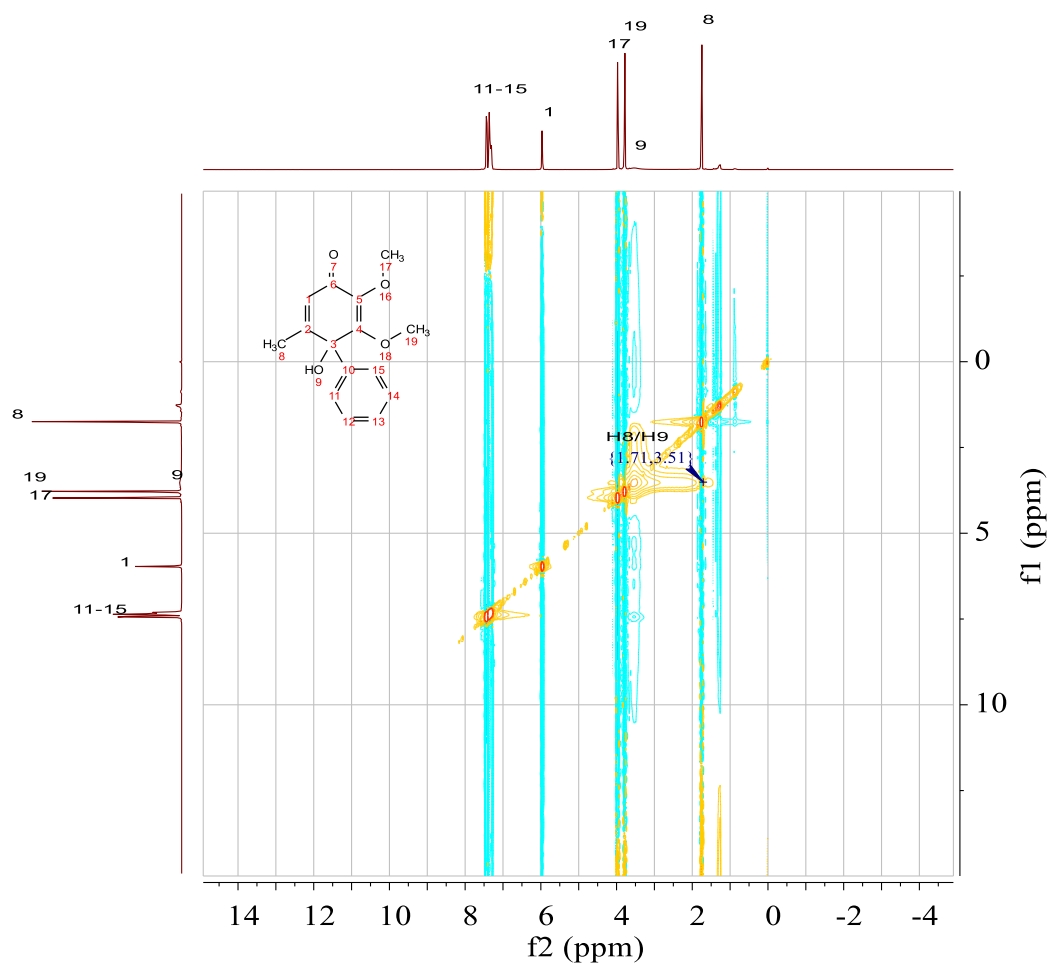

<sup>1</sup>H NMR of compound **3ga'**

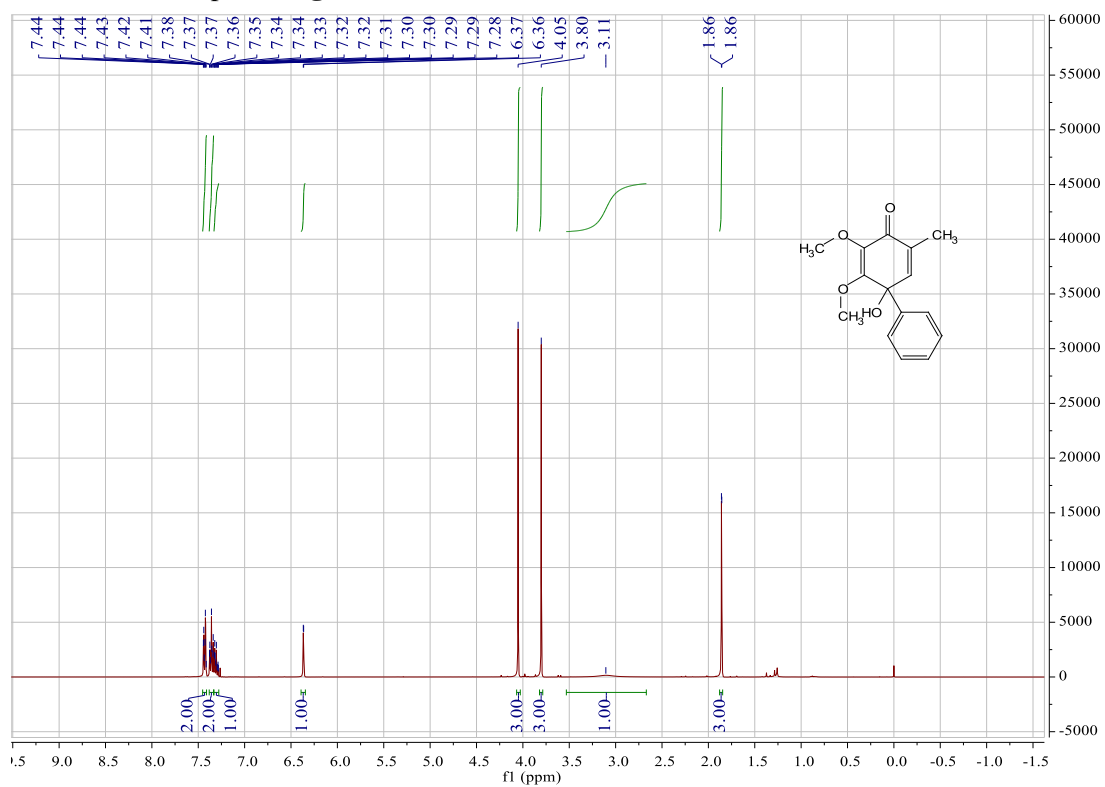

<sup>13</sup>C NMR of compound **3ga'**

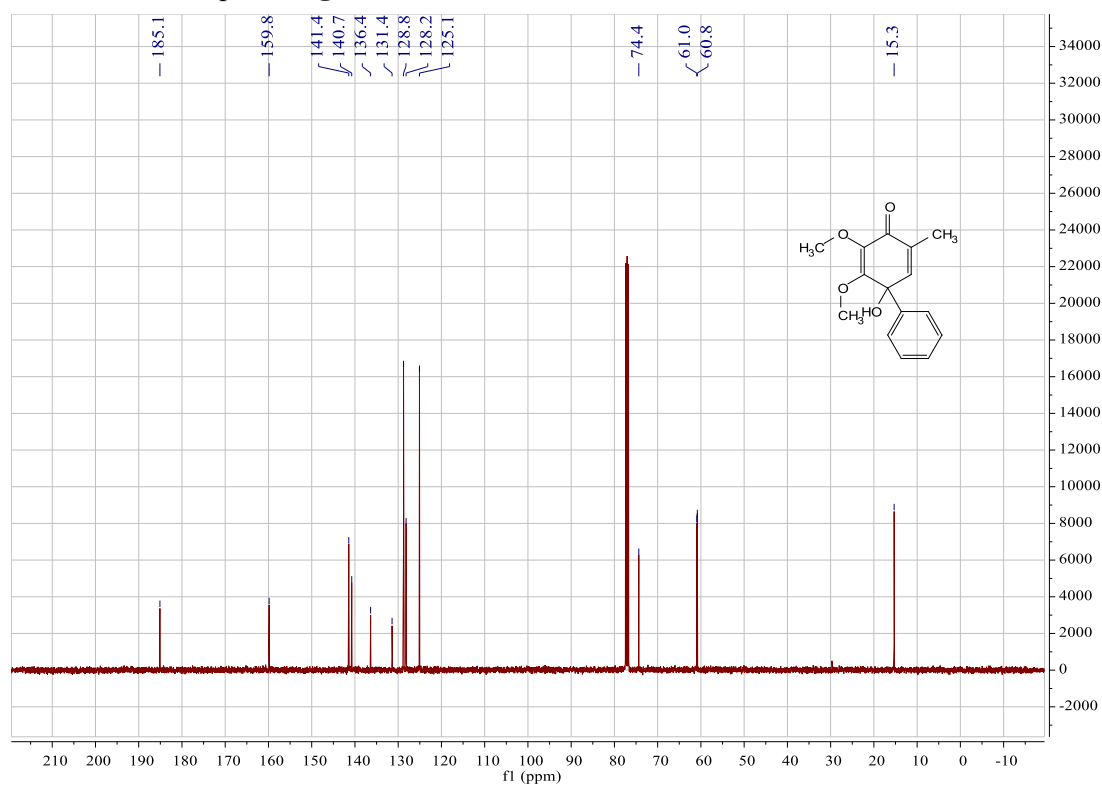

<sup>1</sup>H NMR of compound **3ha**

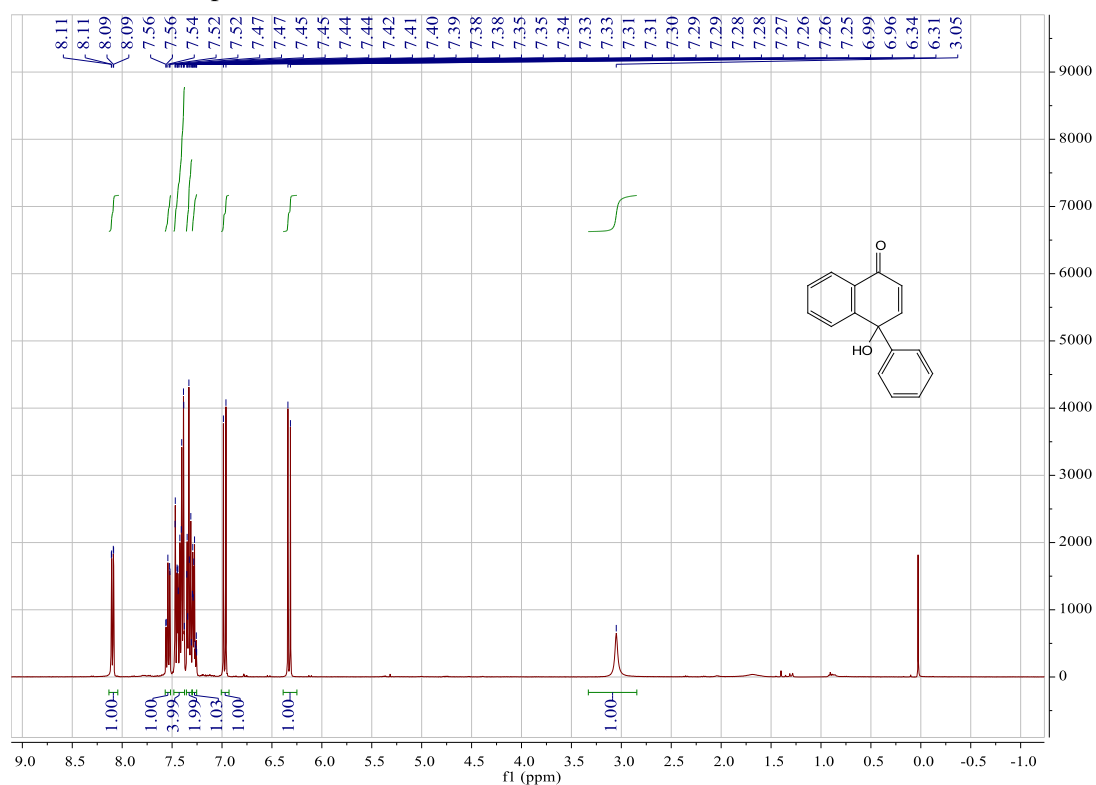

<sup>13</sup>C NMR of compound **3ha**

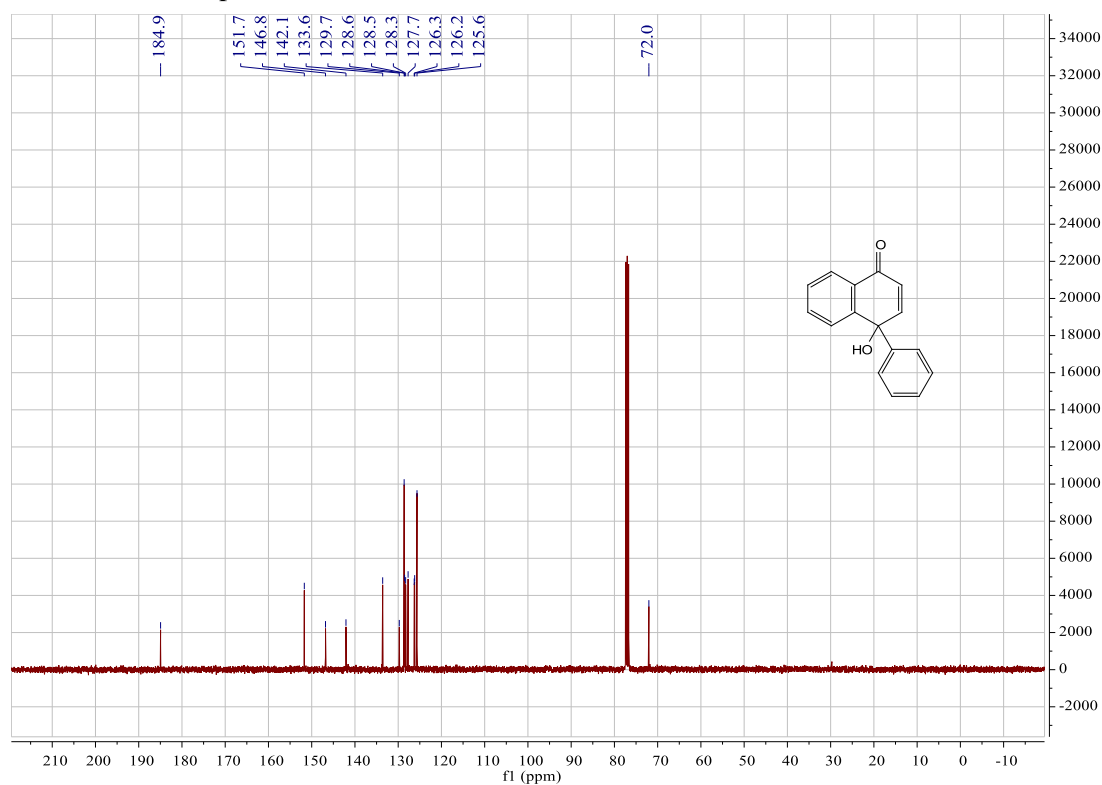

### <sup>1</sup>H NMR of compound 4aa

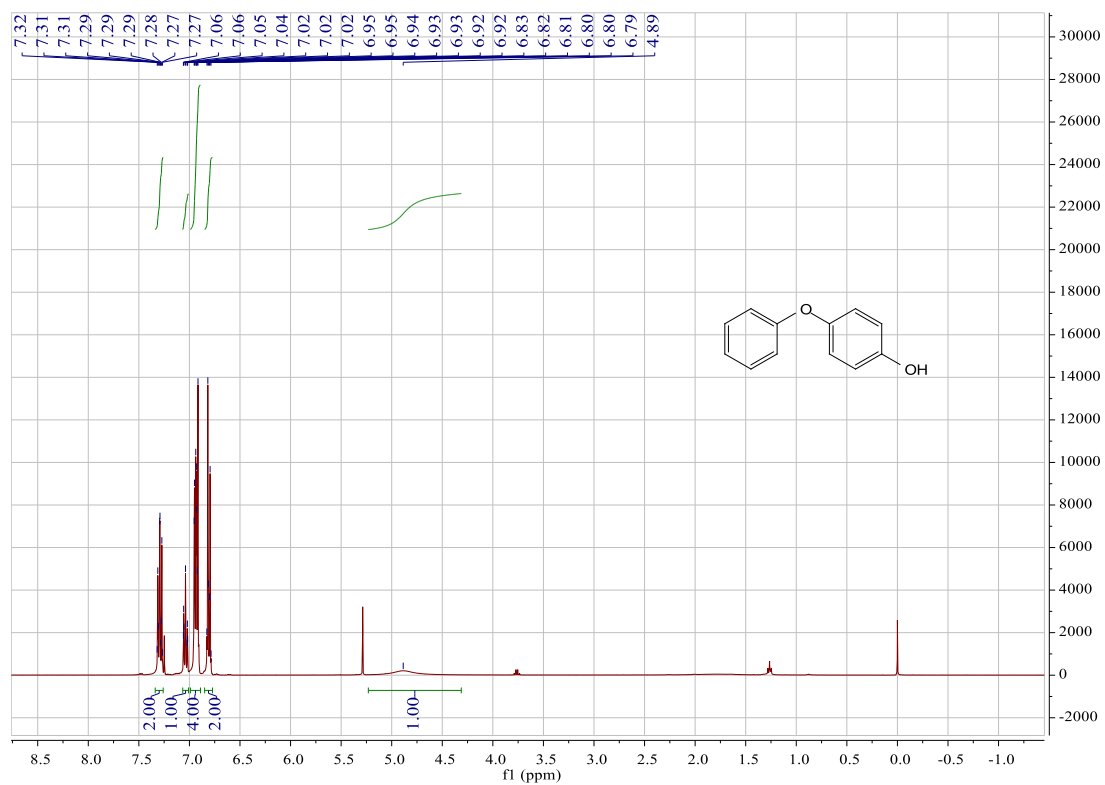

### <sup>13</sup>C NMR of compound 4aa

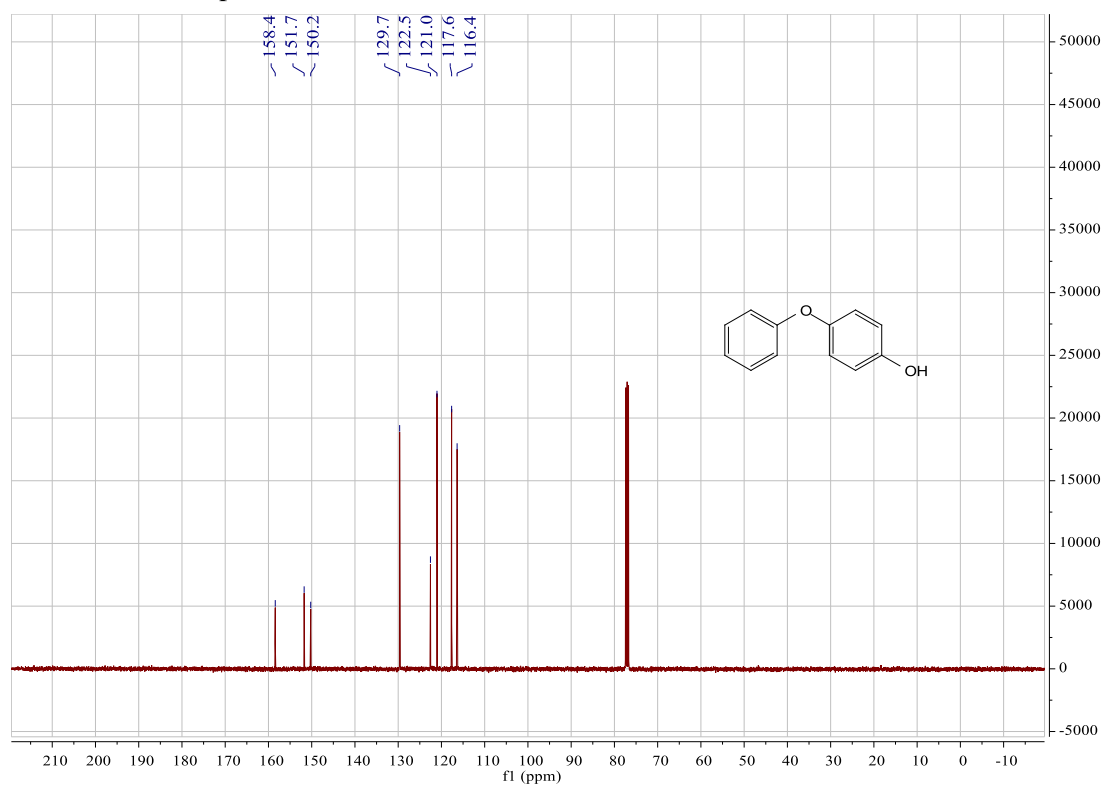

<sup>1</sup>H NMR of compound **4ab**

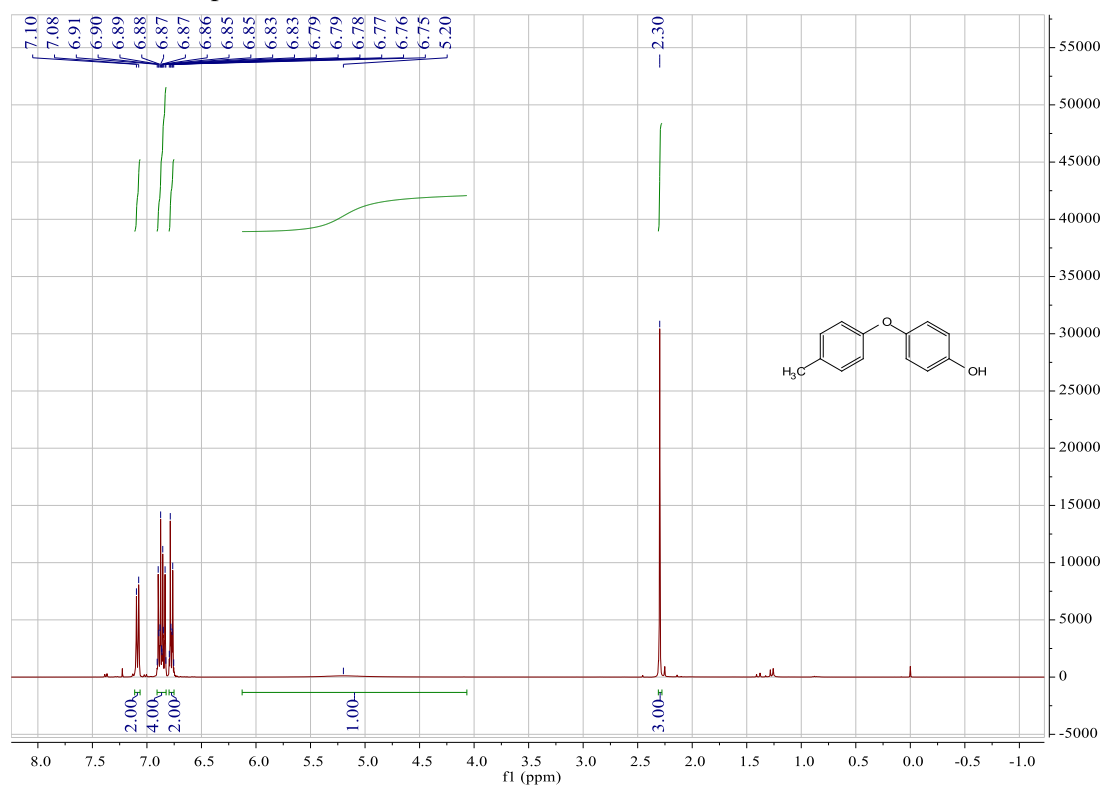

<sup>13</sup>C NMR of compound **4ab**

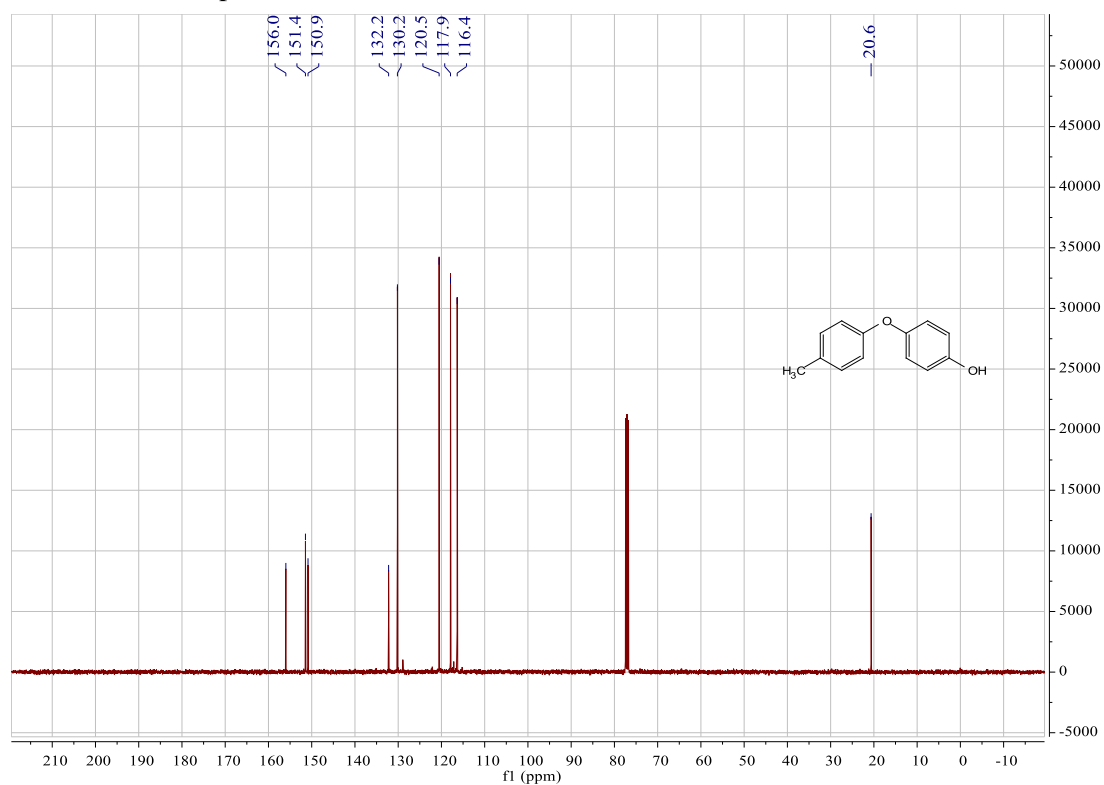

<sup>1</sup>H NMR of compound **4ac**

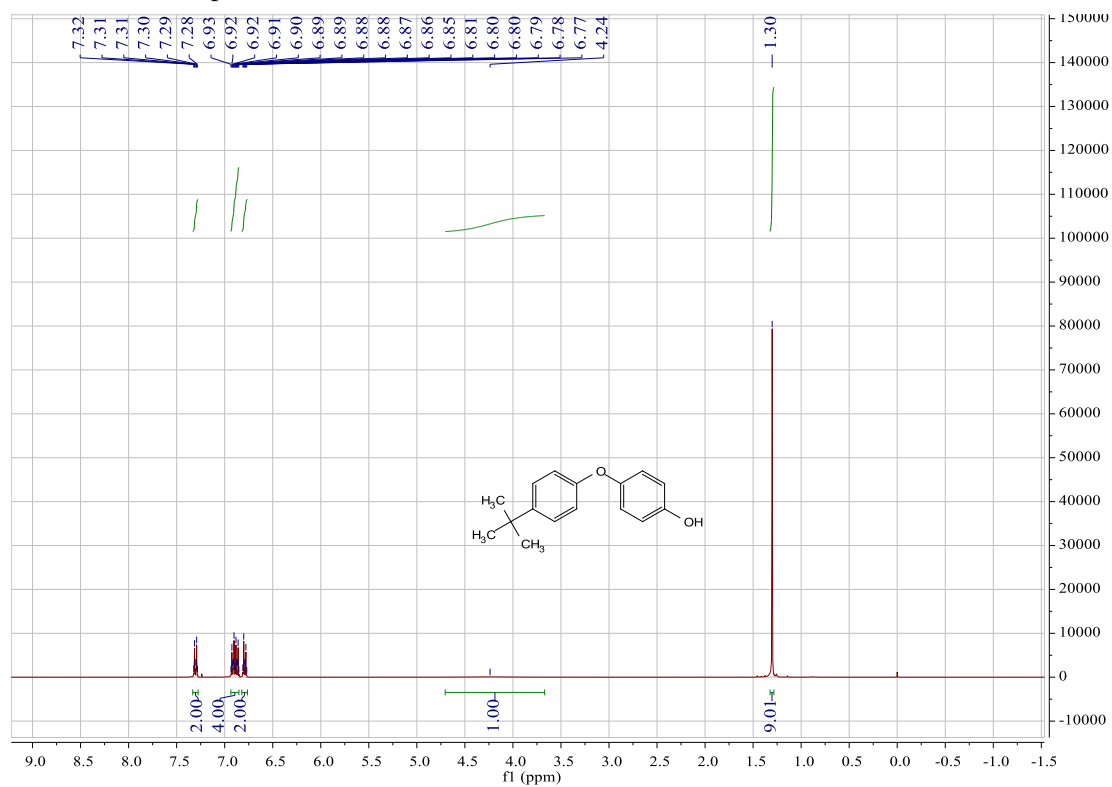

<sup>13</sup>C NMR of compound **4ac**

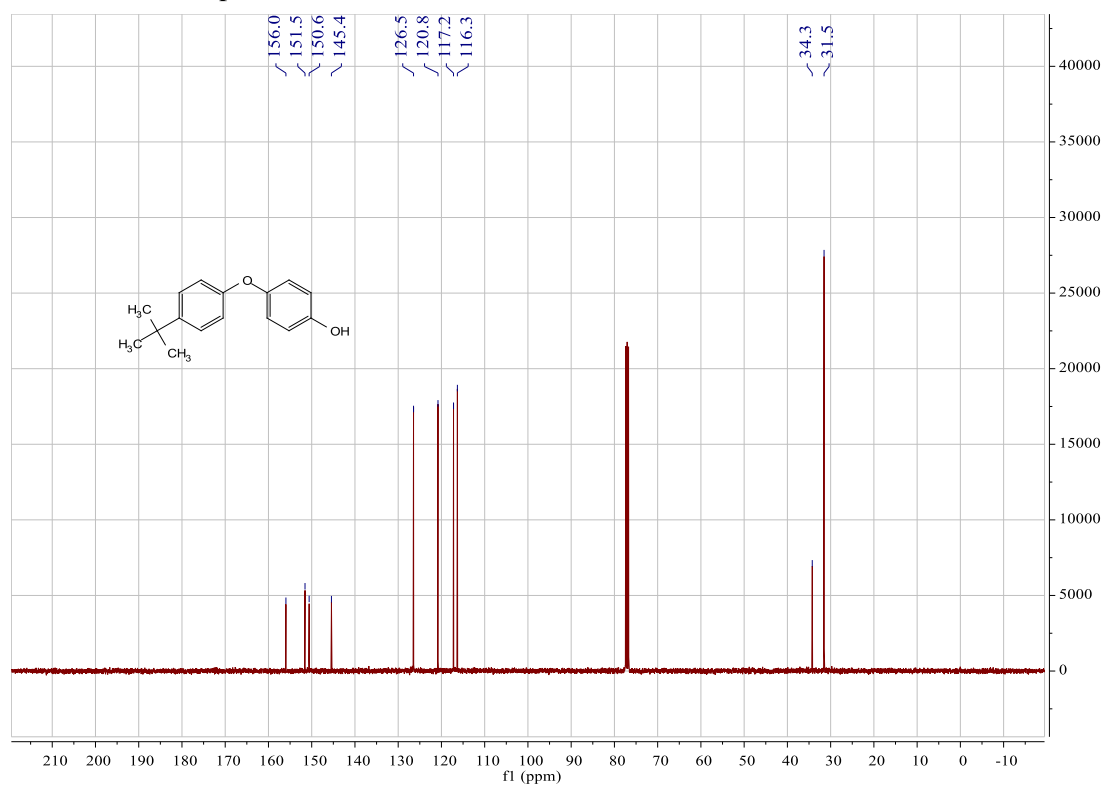



### <sup>1</sup>H NMR of compound 4ad

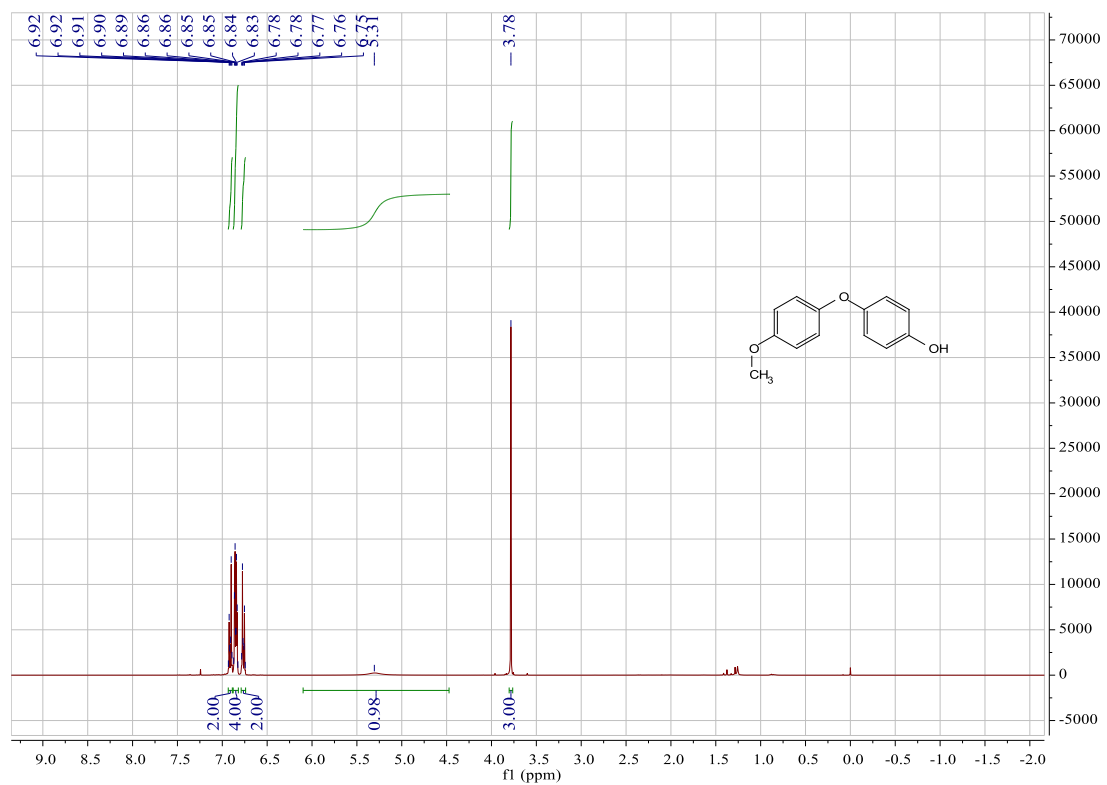

### <sup>13</sup>C NMR of compound 4ad

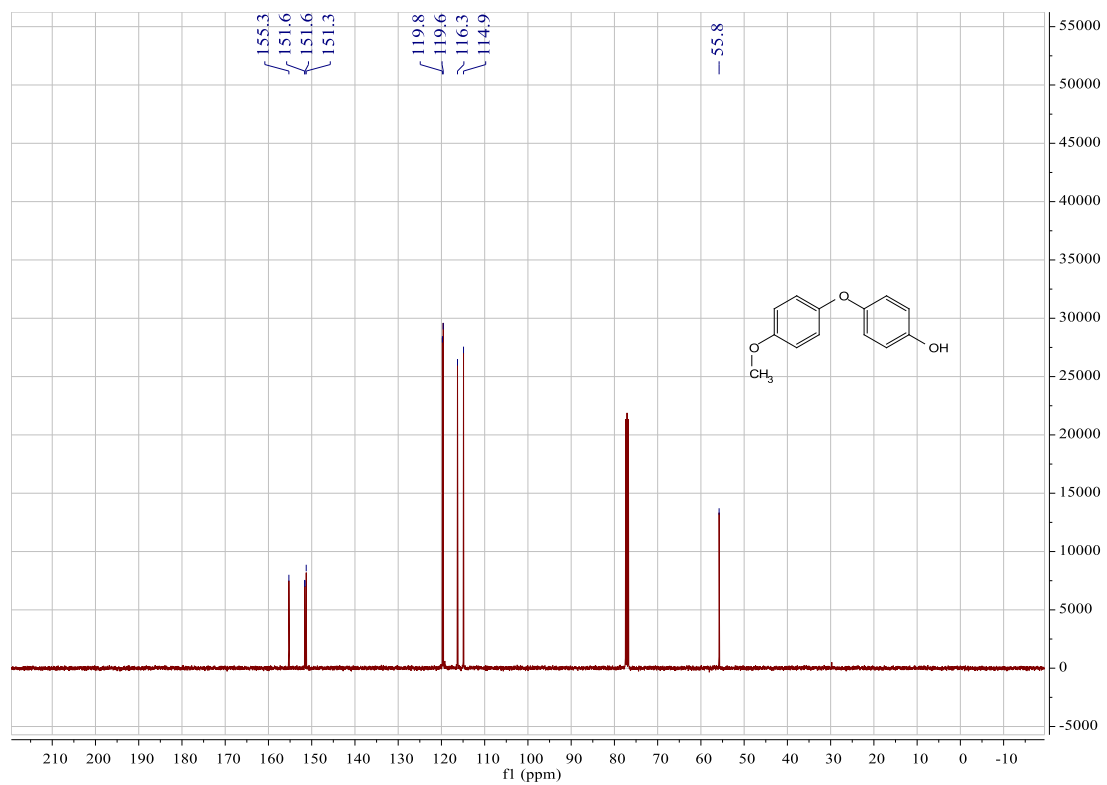

<sup>1</sup>H NMR of compound **4ae**

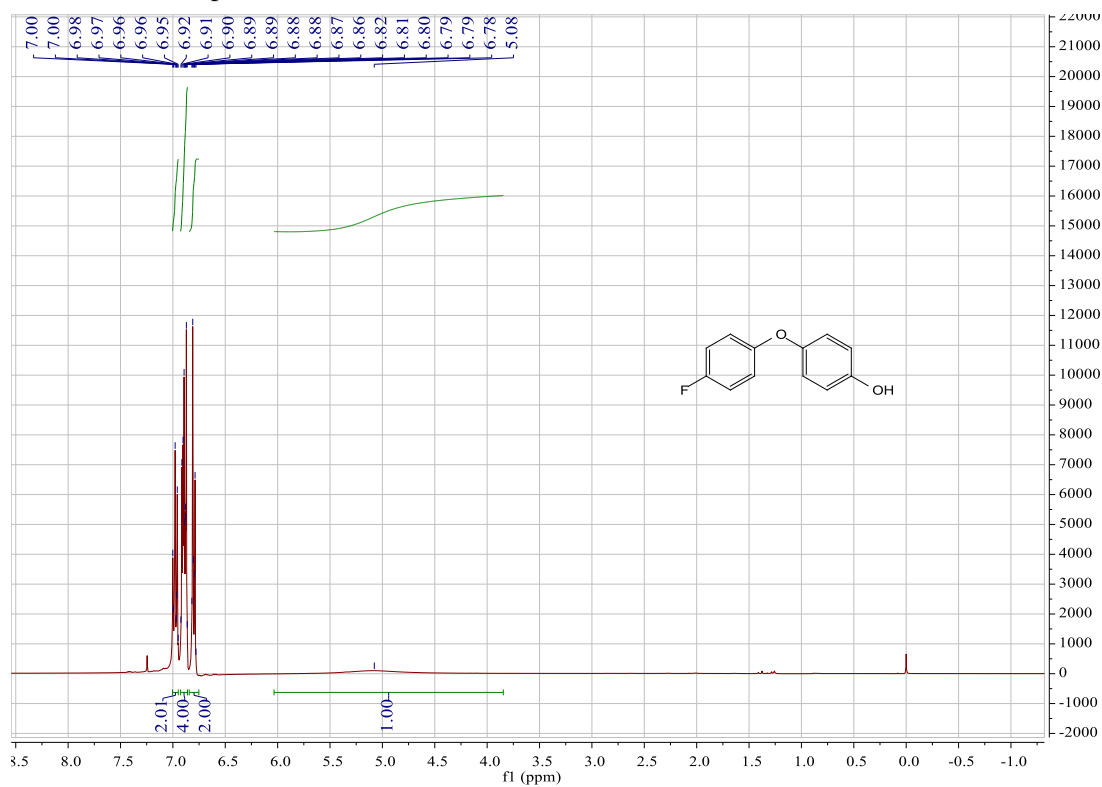

<sup>13</sup>C NMR of compound **4ae**

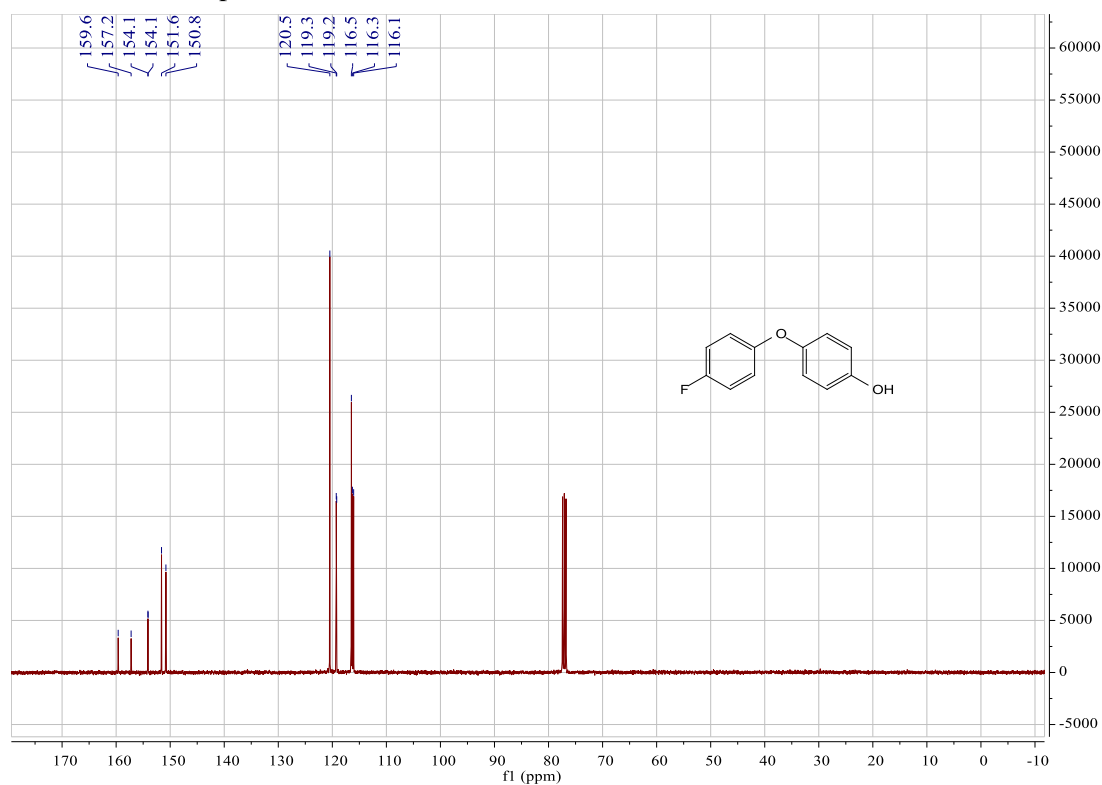

### <sup>1</sup>H NMR of compound 4af

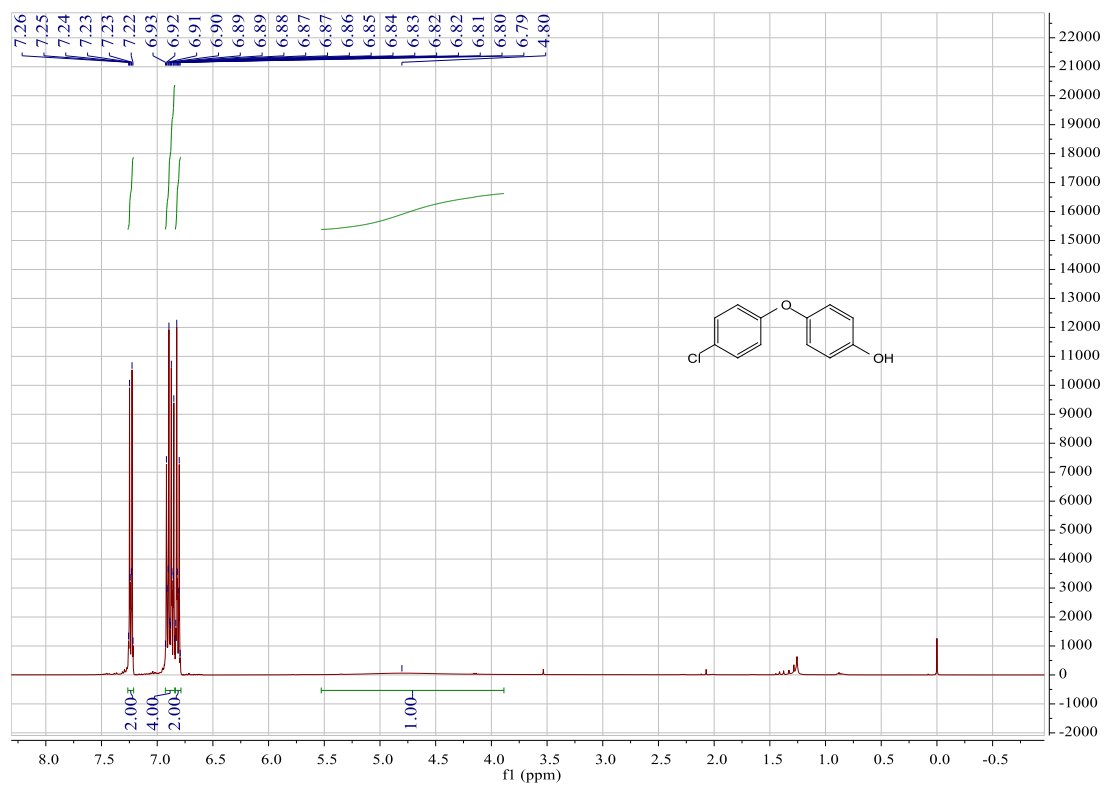

### <sup>13</sup>C NMR of compound 4af

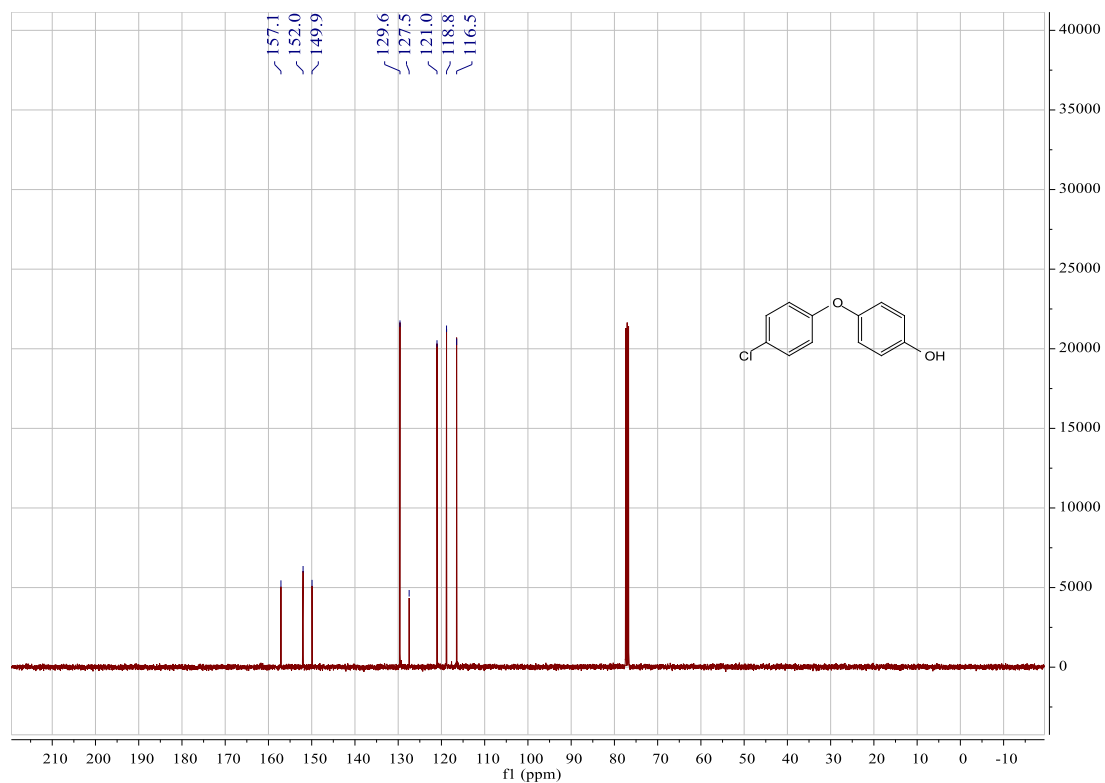

<sup>1</sup>H NMR of compound **4ag**

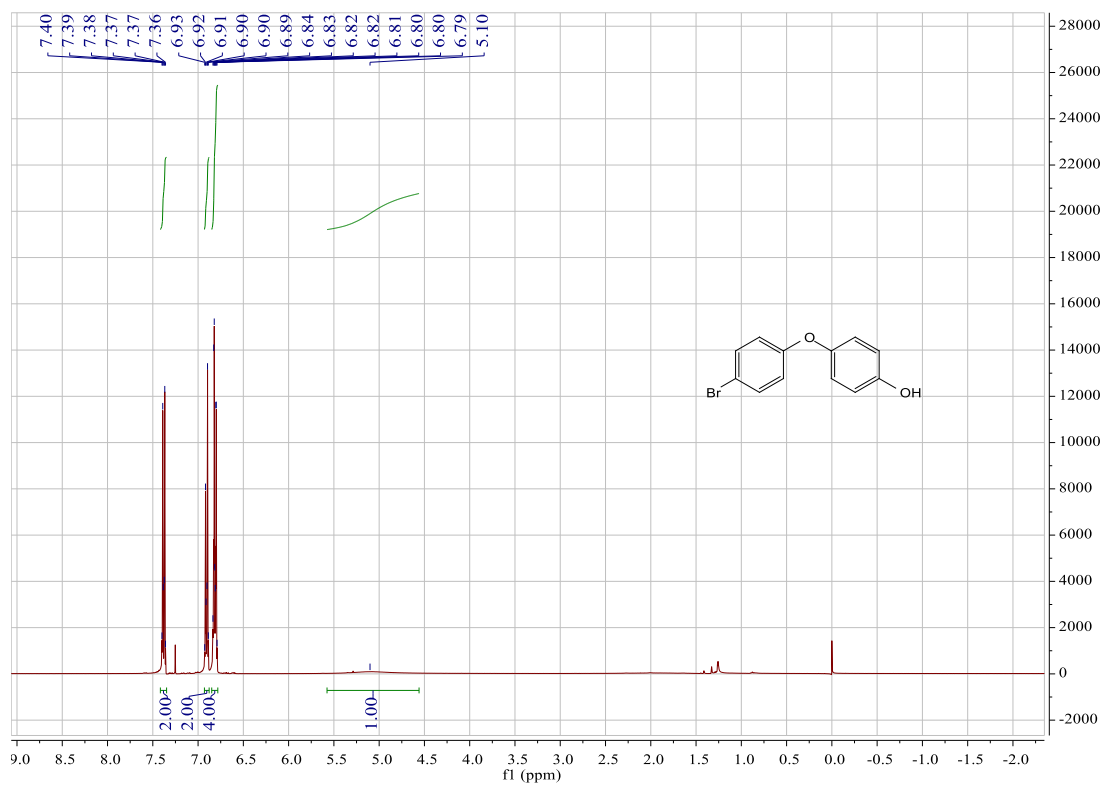

<sup>13</sup>C NMR of compound **4ag**

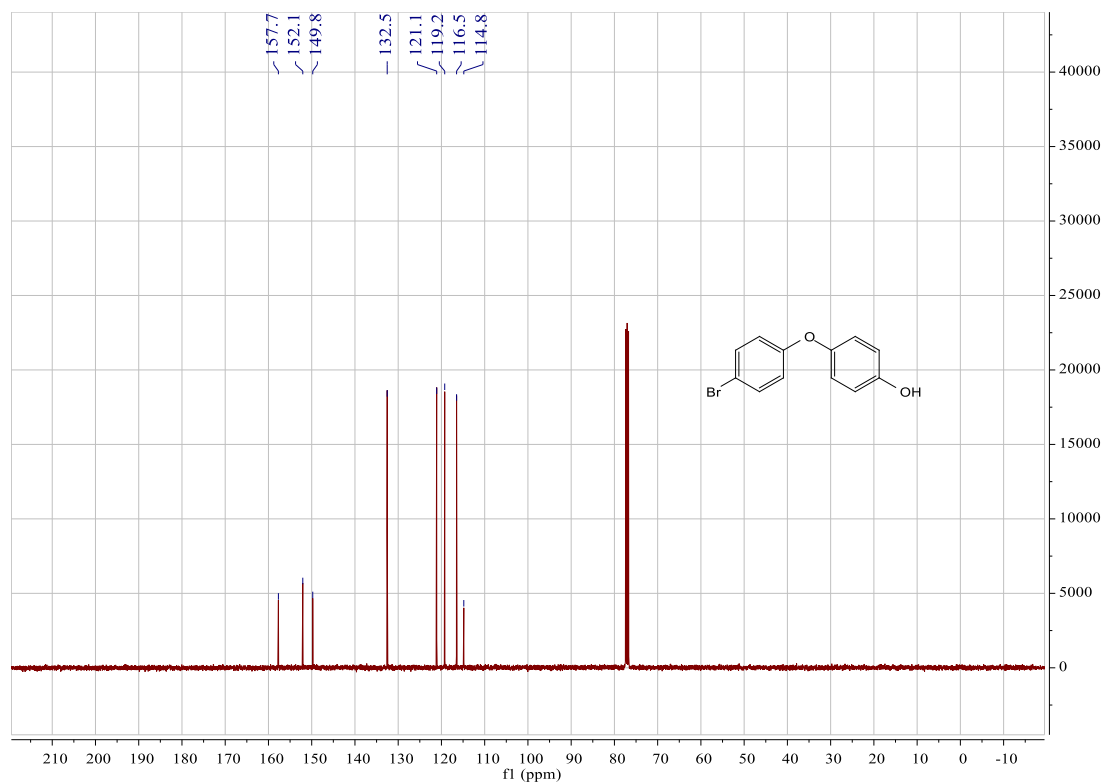

<sup>1</sup>H NMR of compound **4ah**

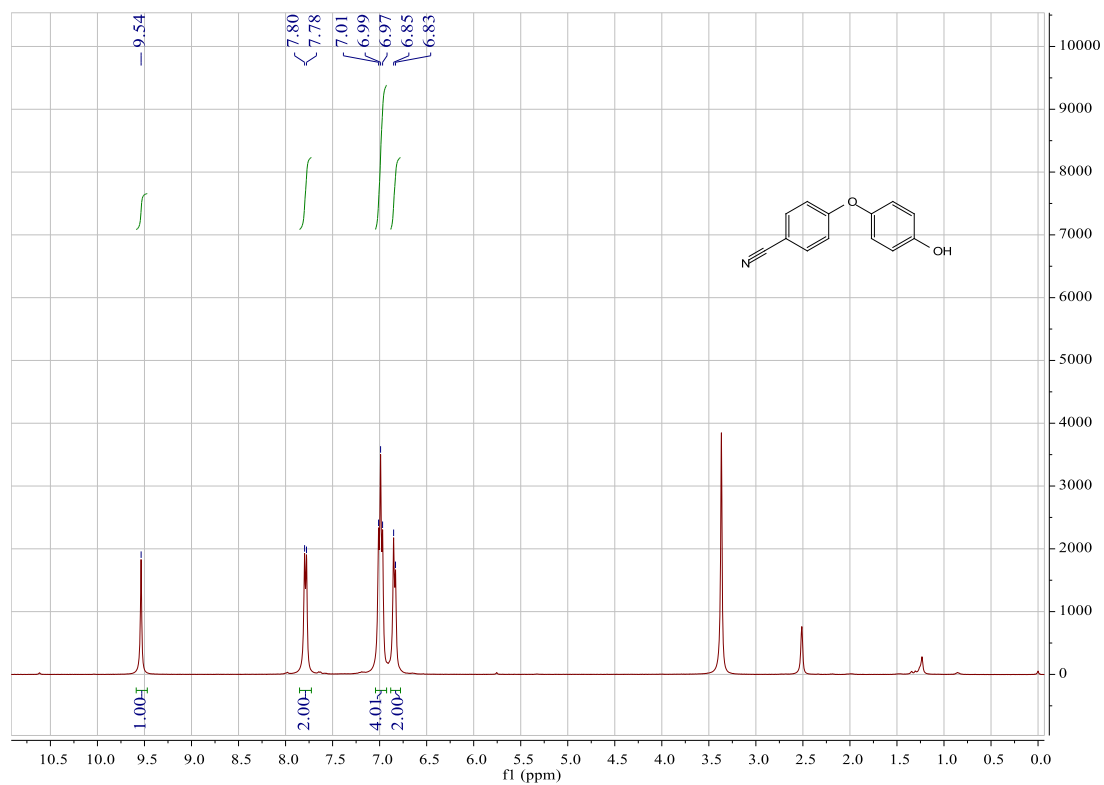

<sup>13</sup>C NMR of compound **4ah**

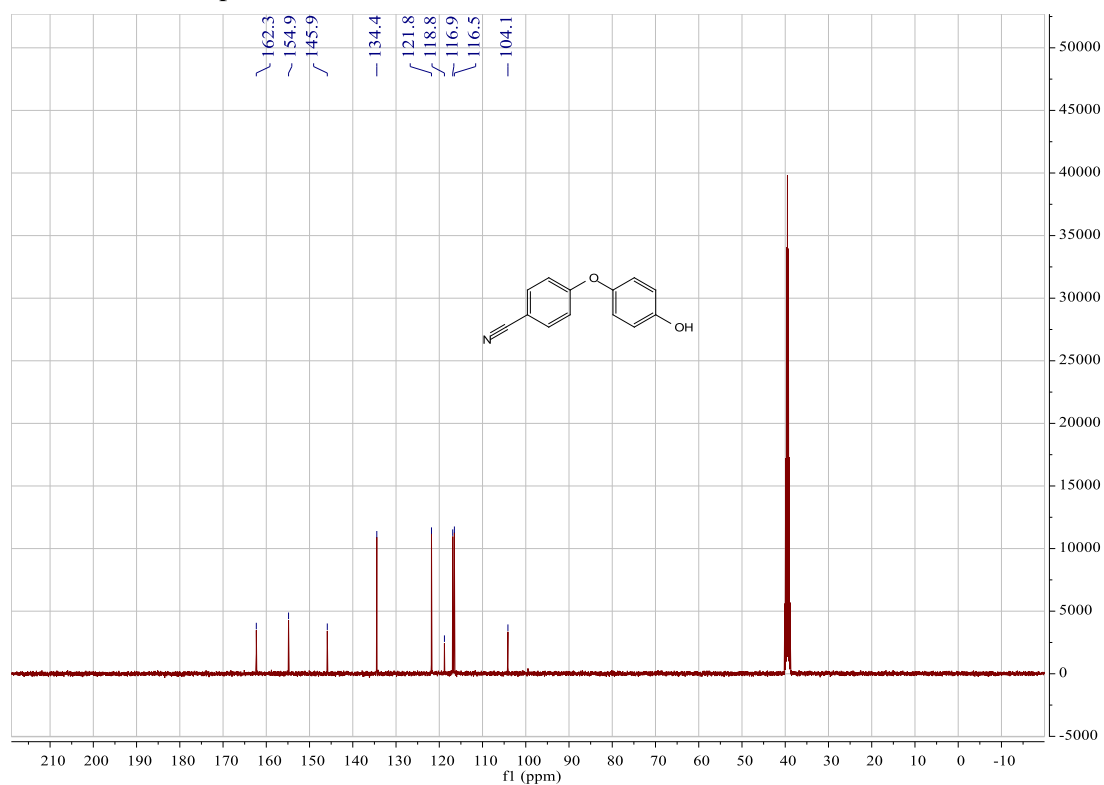

<sup>1</sup>H NMR of compound **4ai**

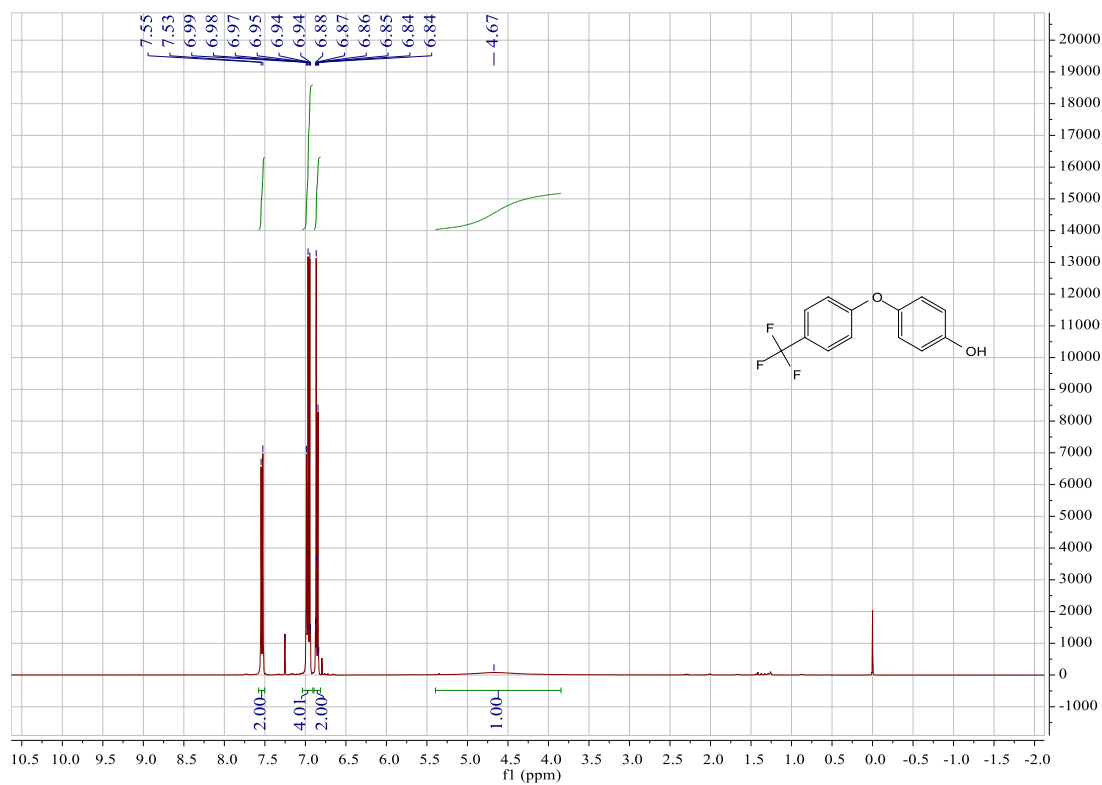

<sup>13</sup>C NMR of compound **4ai**

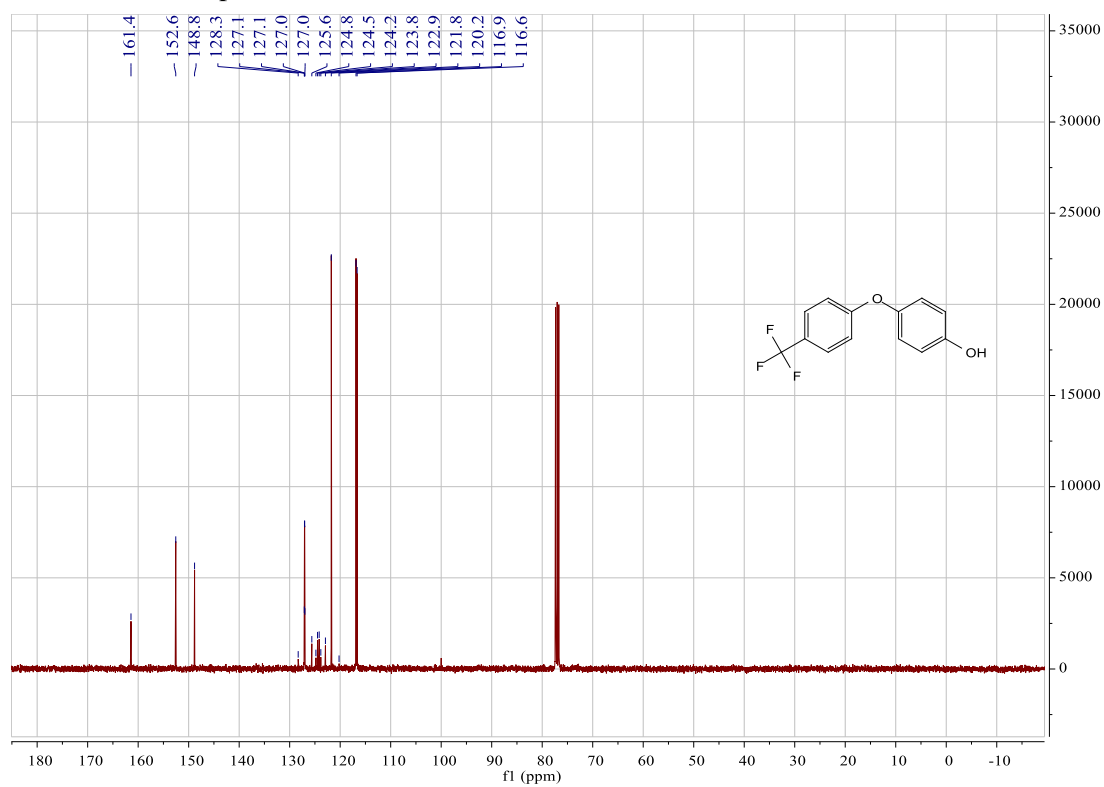

<sup>1</sup>H NMR of compound **4aj**

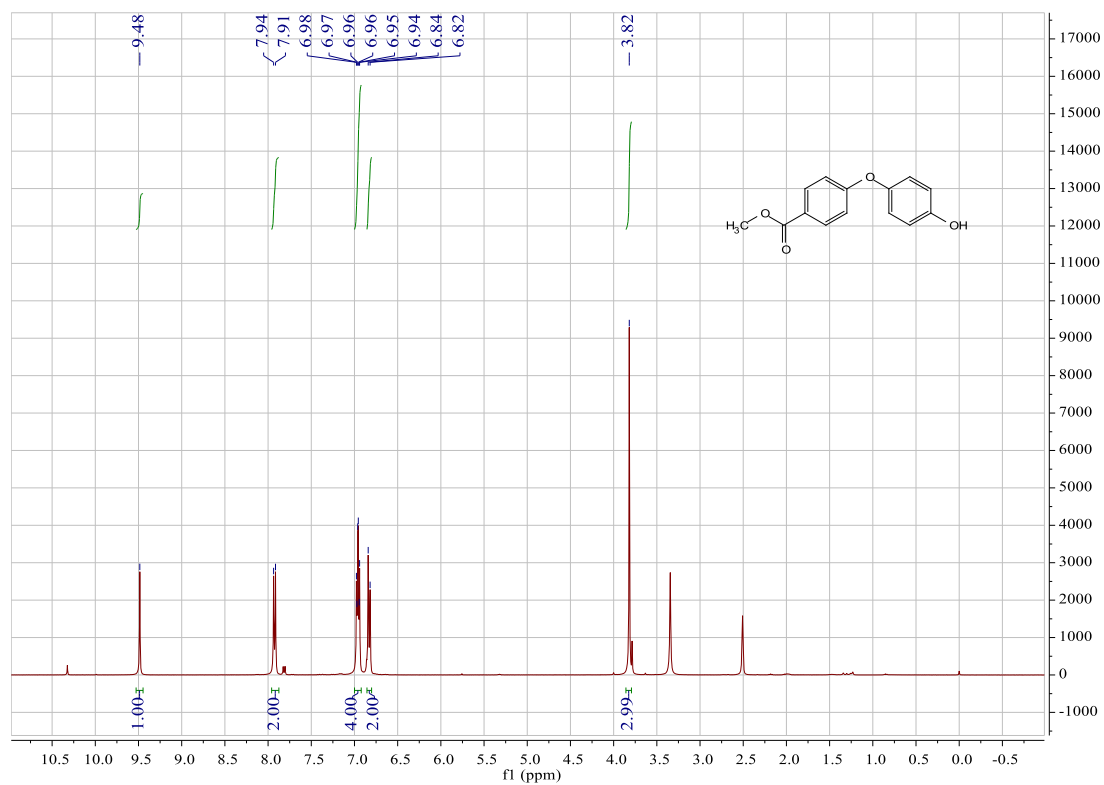

<sup>13</sup>C NMR of compound **4aj**

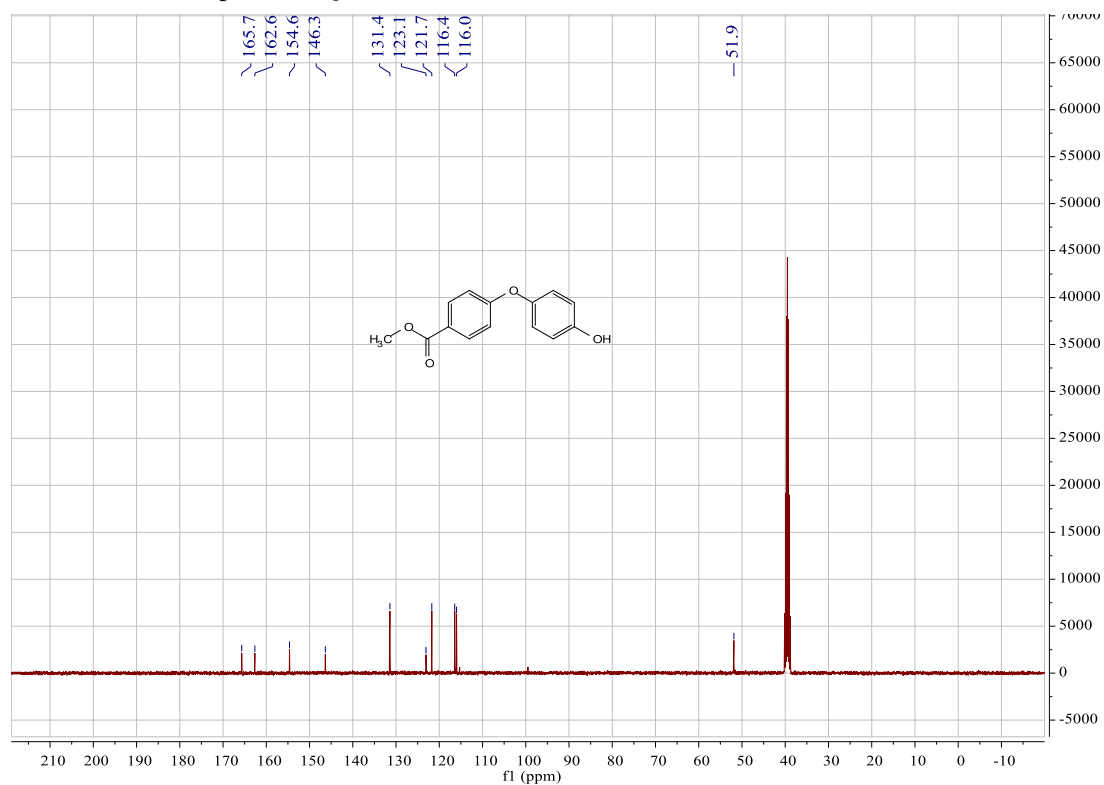

### <sup>1</sup>H NMR of compound **4ak**

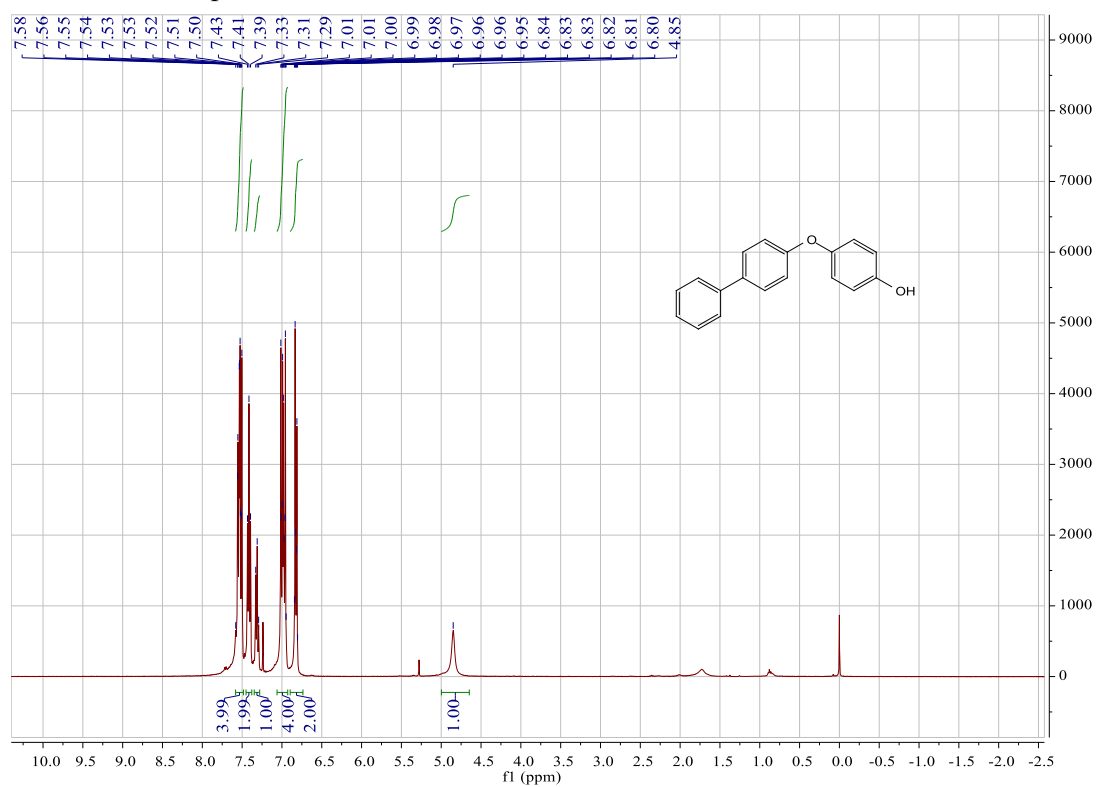

### <sup>13</sup>C NMR of compound **4ak**

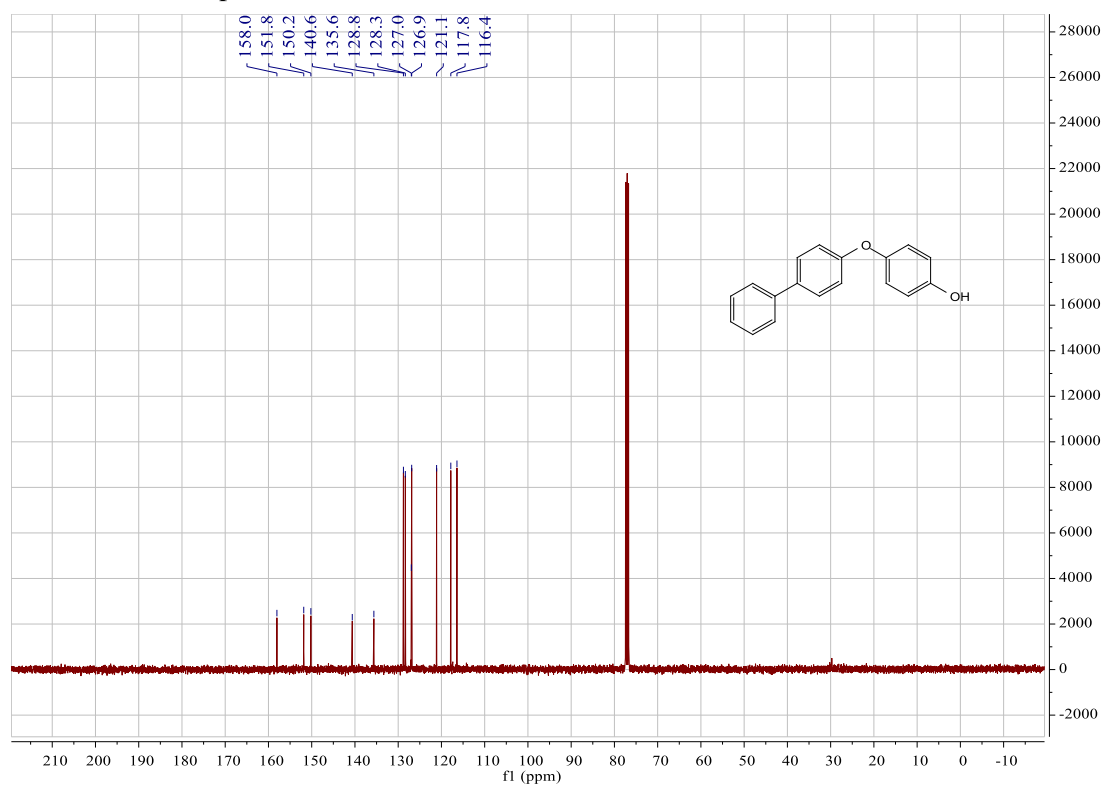



<sup>1</sup>H NMR of compound **4al**

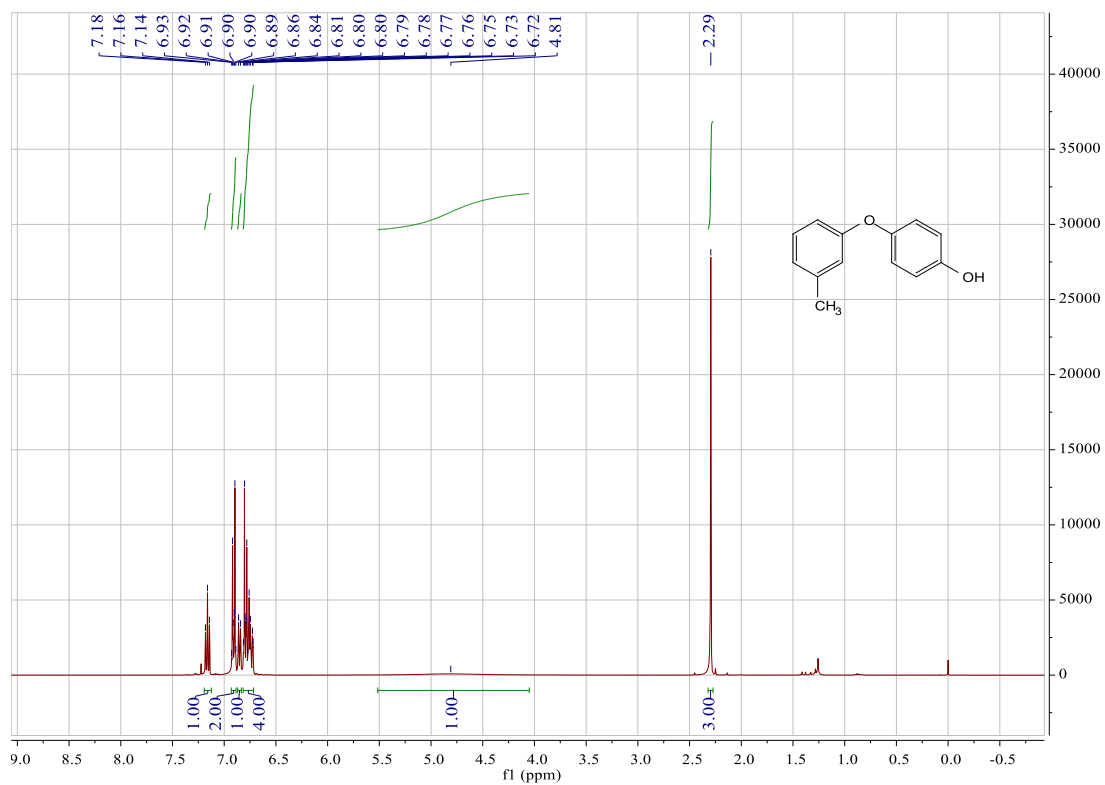

<sup>13</sup>C NMR of compound **4al**

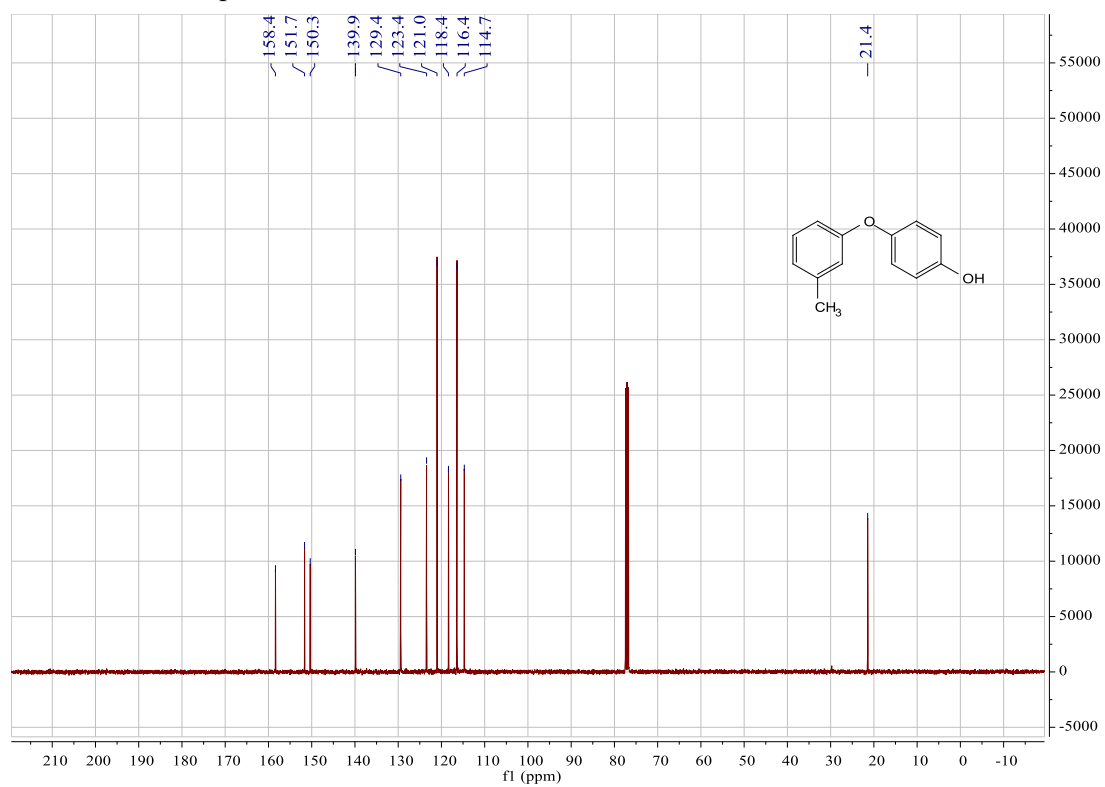

### <sup>1</sup>H NMR of compound **4am**

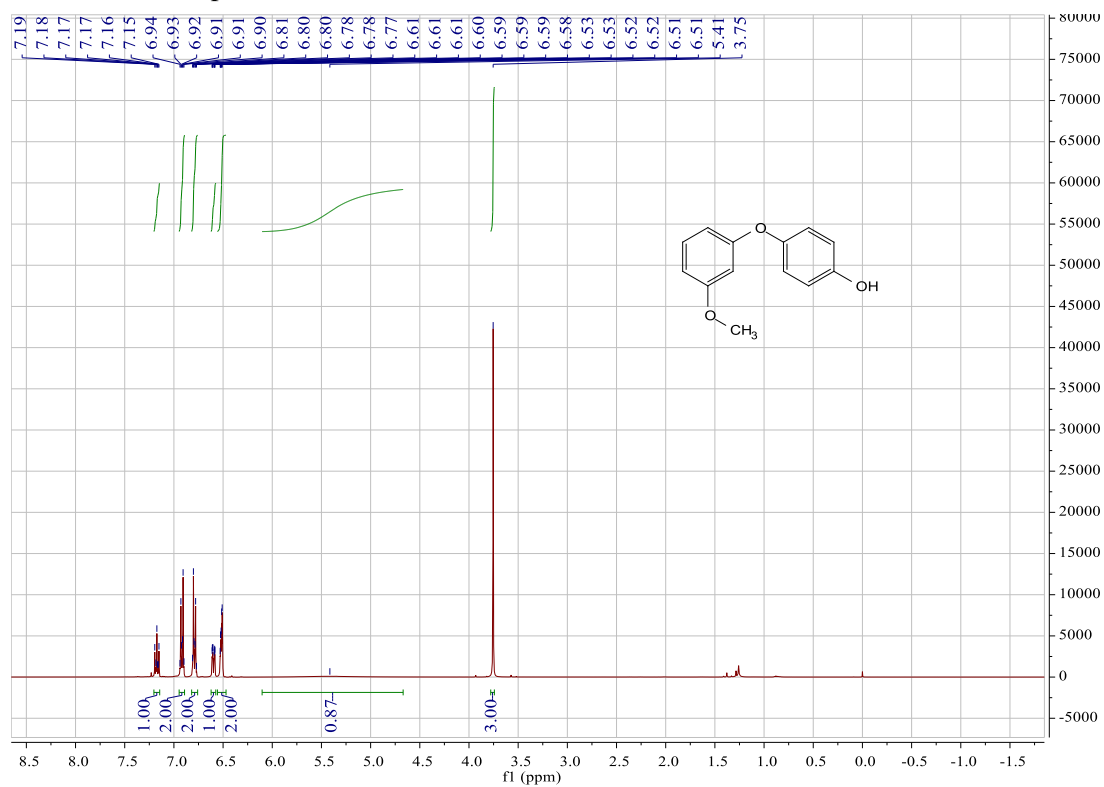

### <sup>13</sup>C NMR of compound **4am**

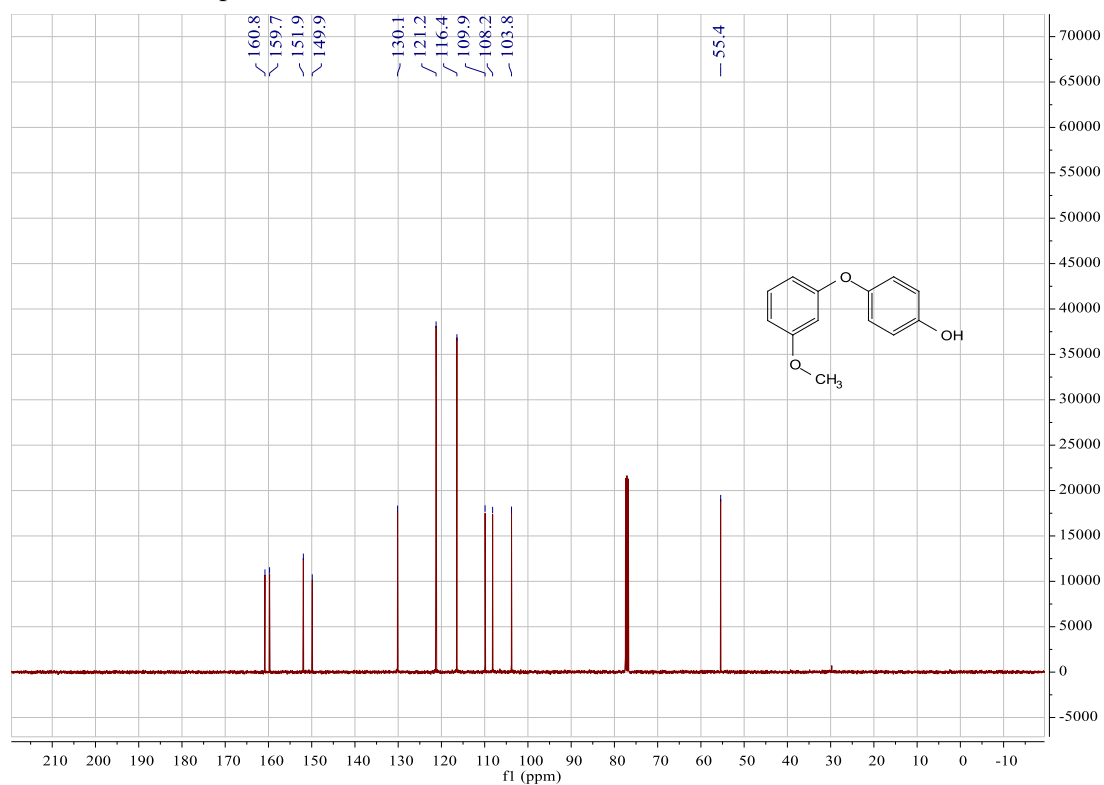

### <sup>1</sup>H NMR of compound **4an**

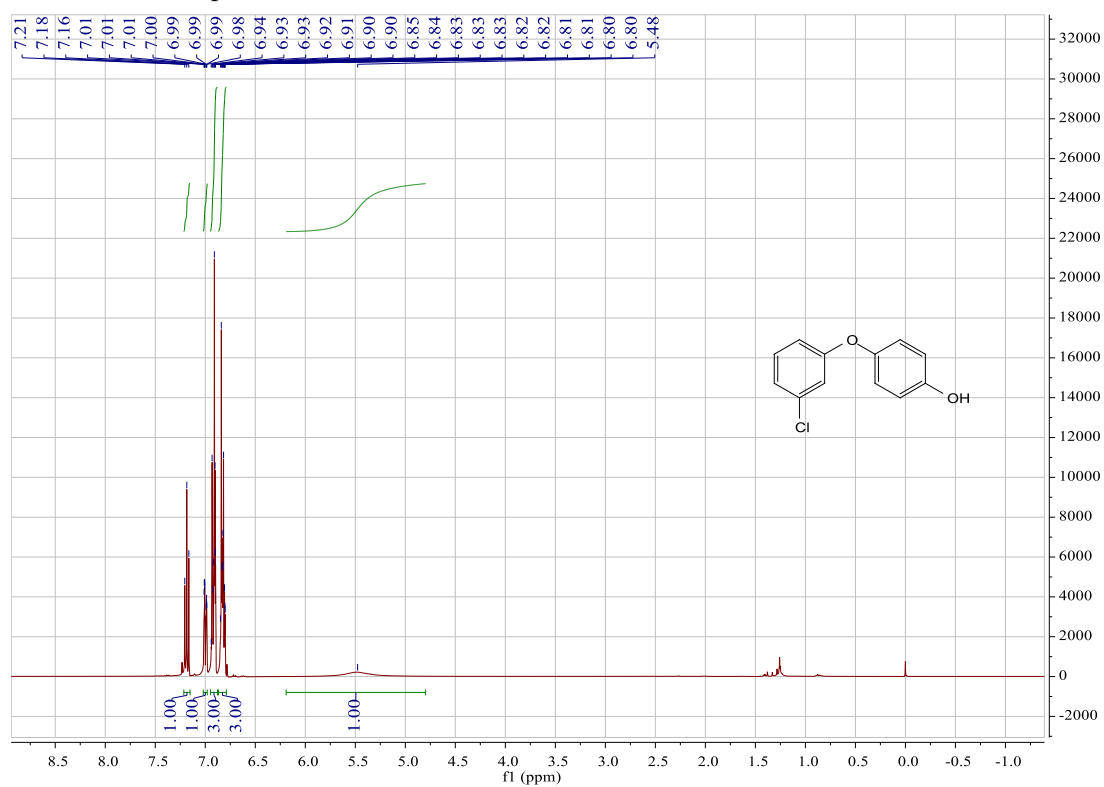

### <sup>13</sup>C NMR of compound **4an**

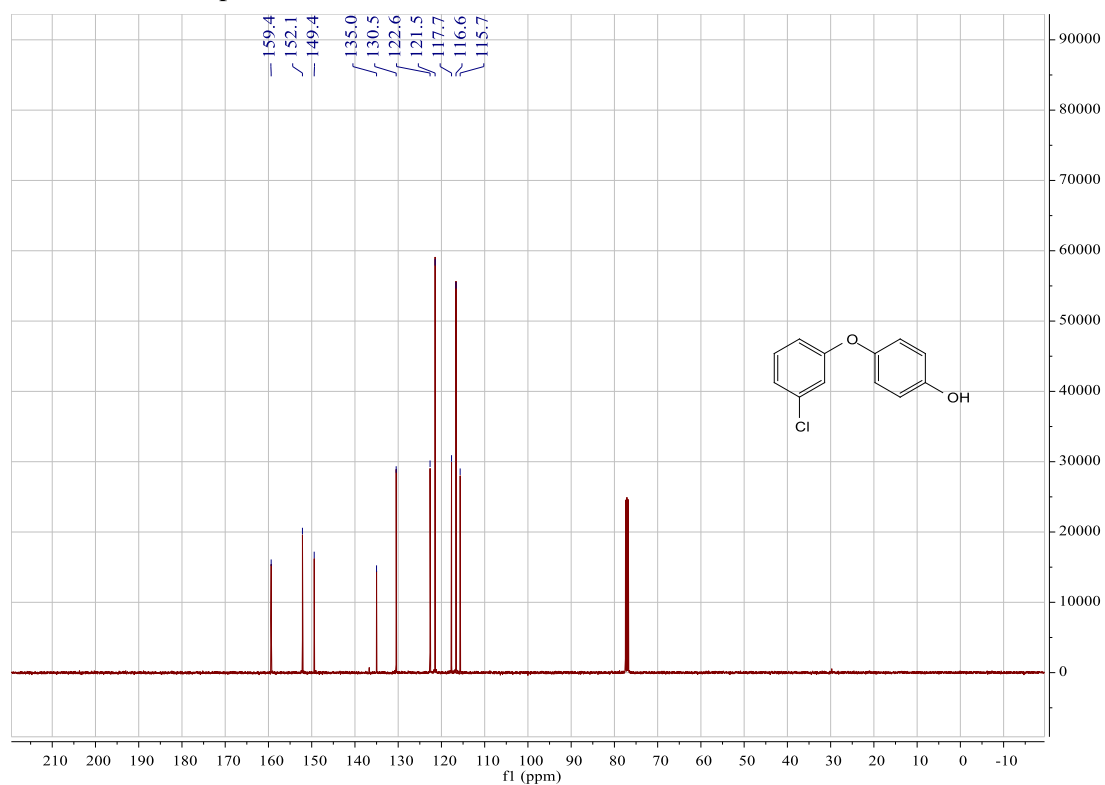

<sup>1</sup>H NMR of compound **4ao**

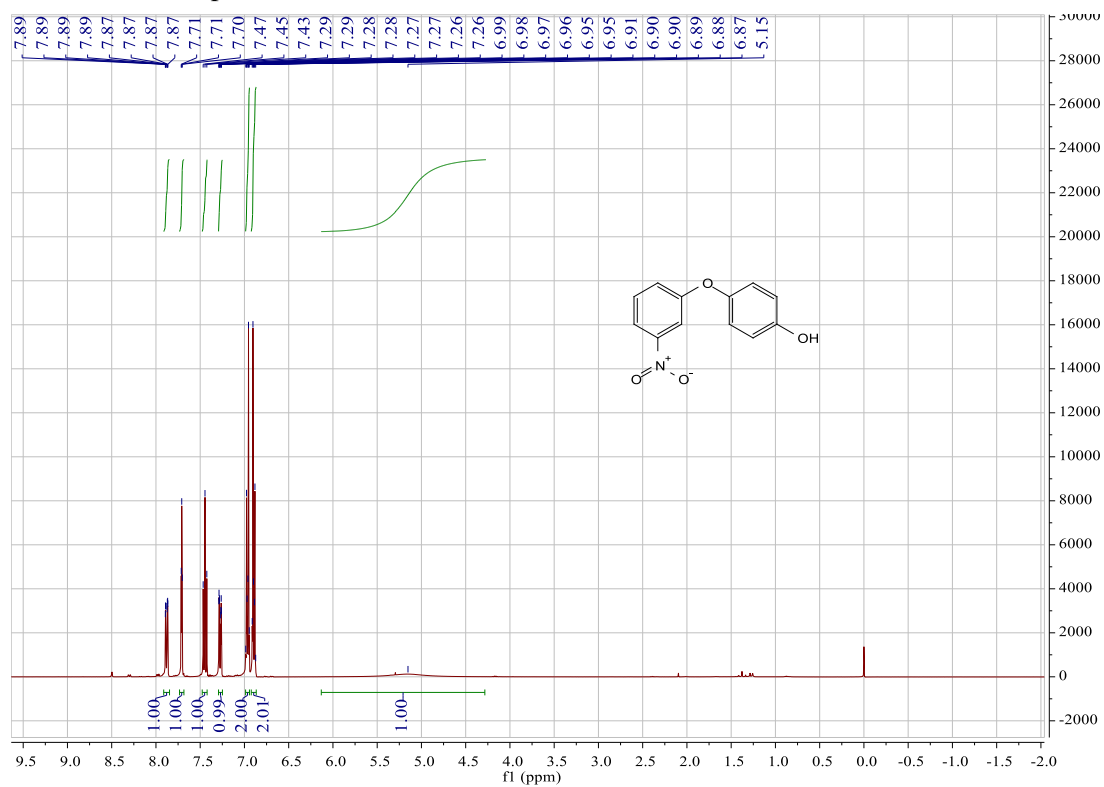

<sup>13</sup>C NMR of compound **4ao**

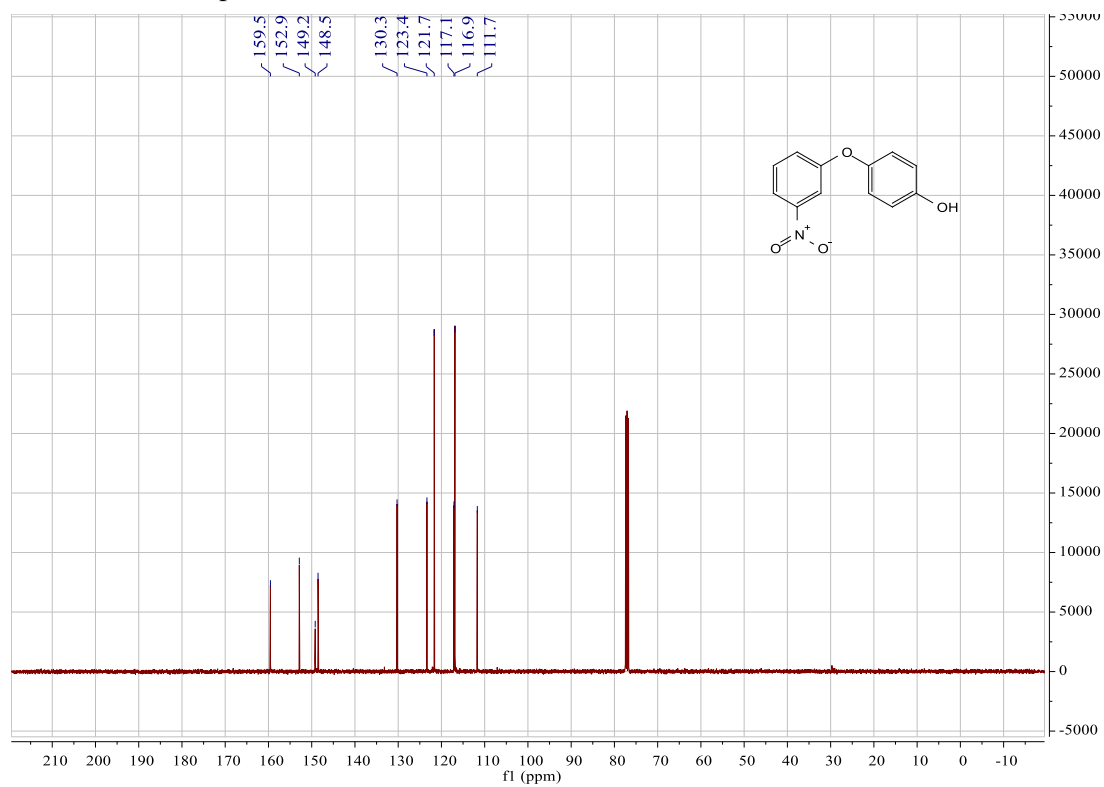

### <sup>1</sup>H NMR of compound 4ap

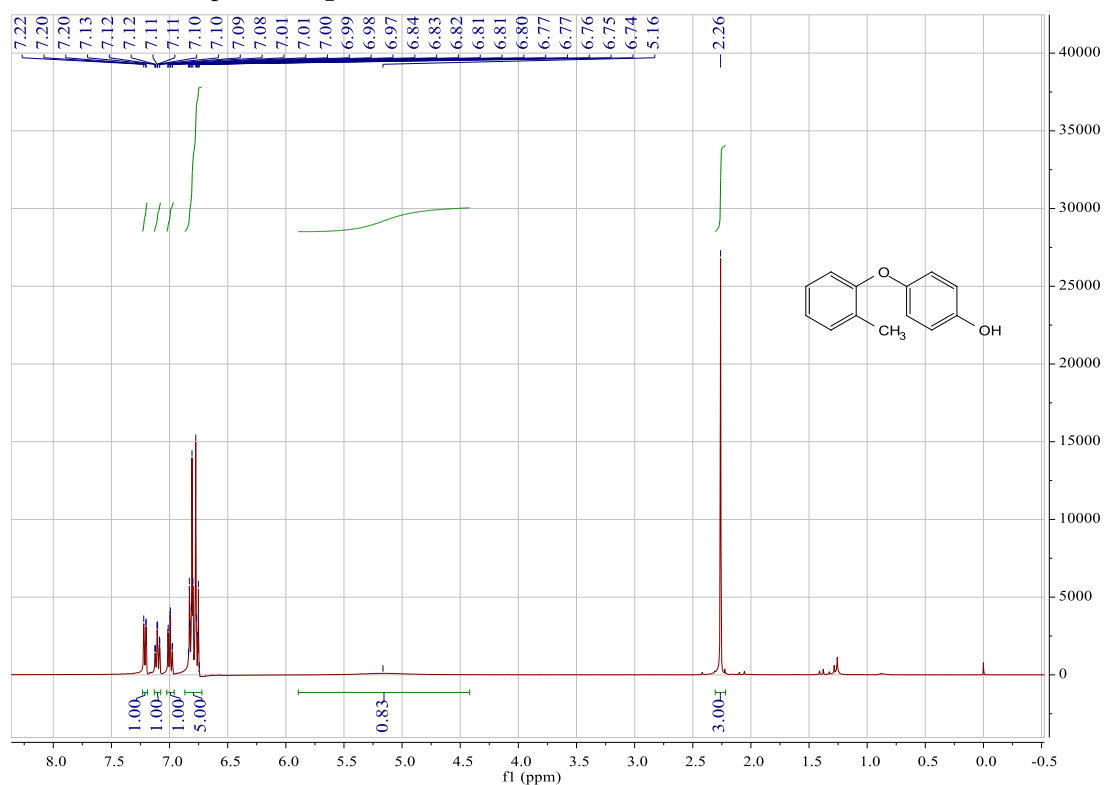

### <sup>13</sup>C NMR of compound 4ap

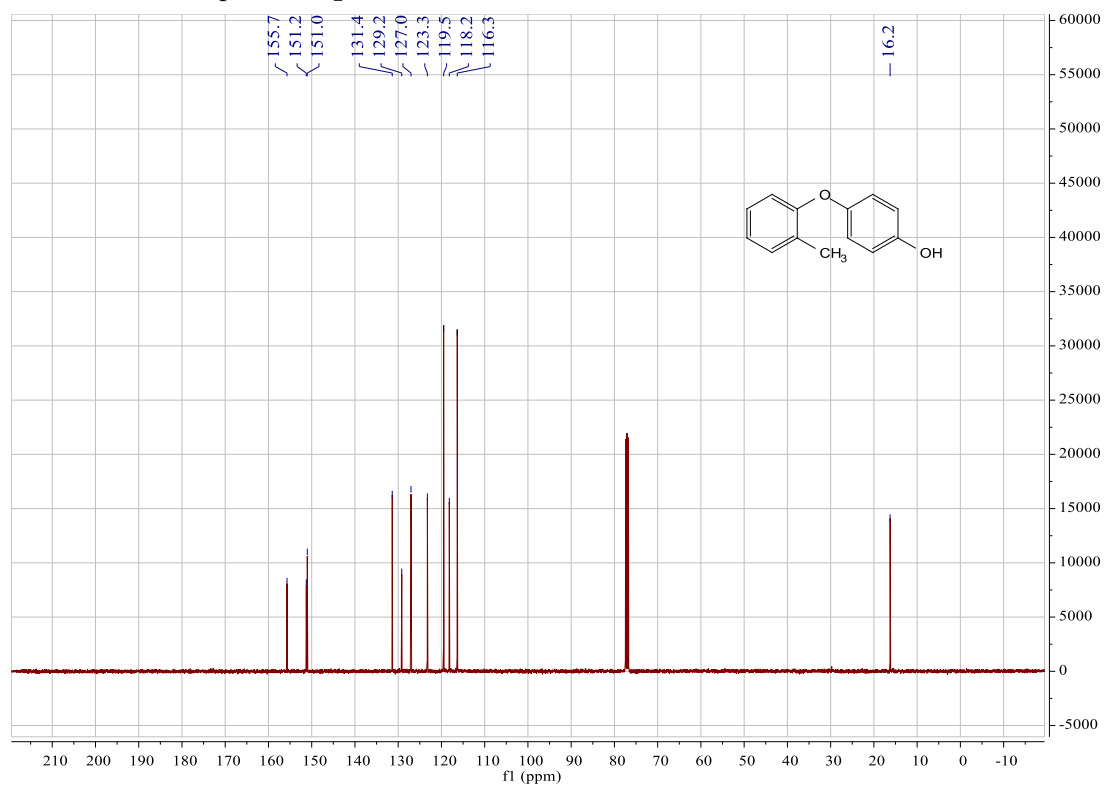

### <sup>1</sup>H NMR of compound 4aq

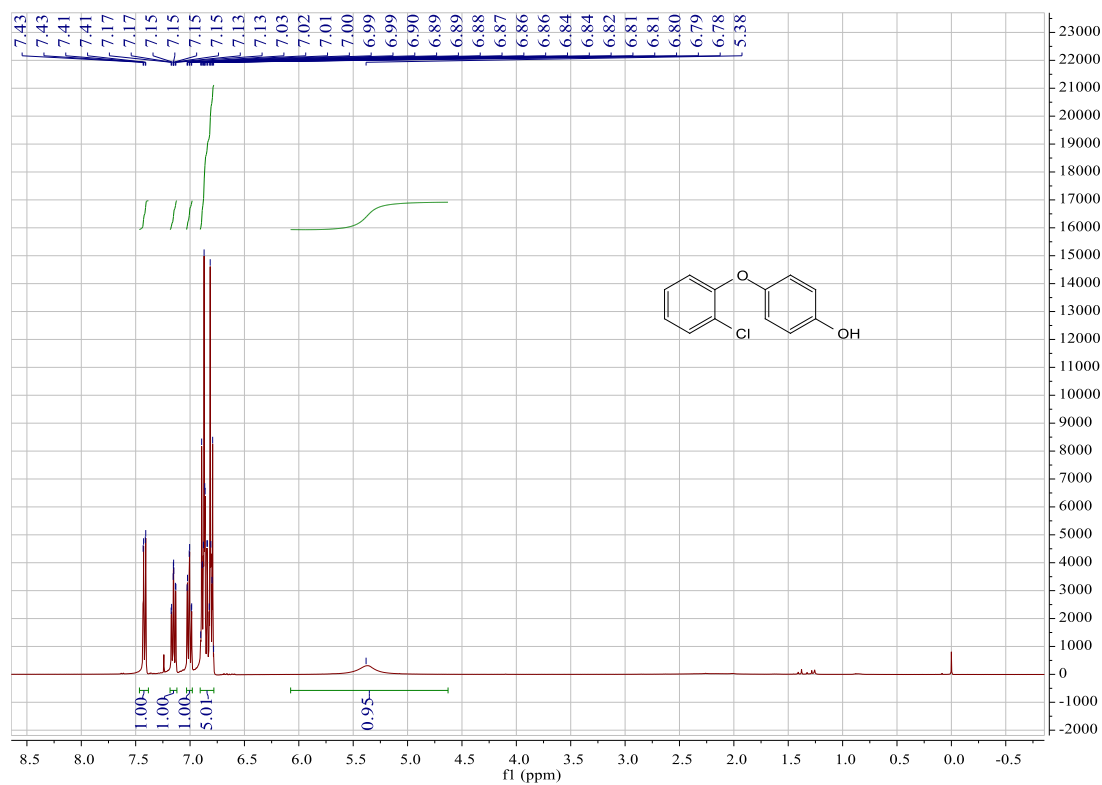

### <sup>13</sup>C NMR of compound 4aq

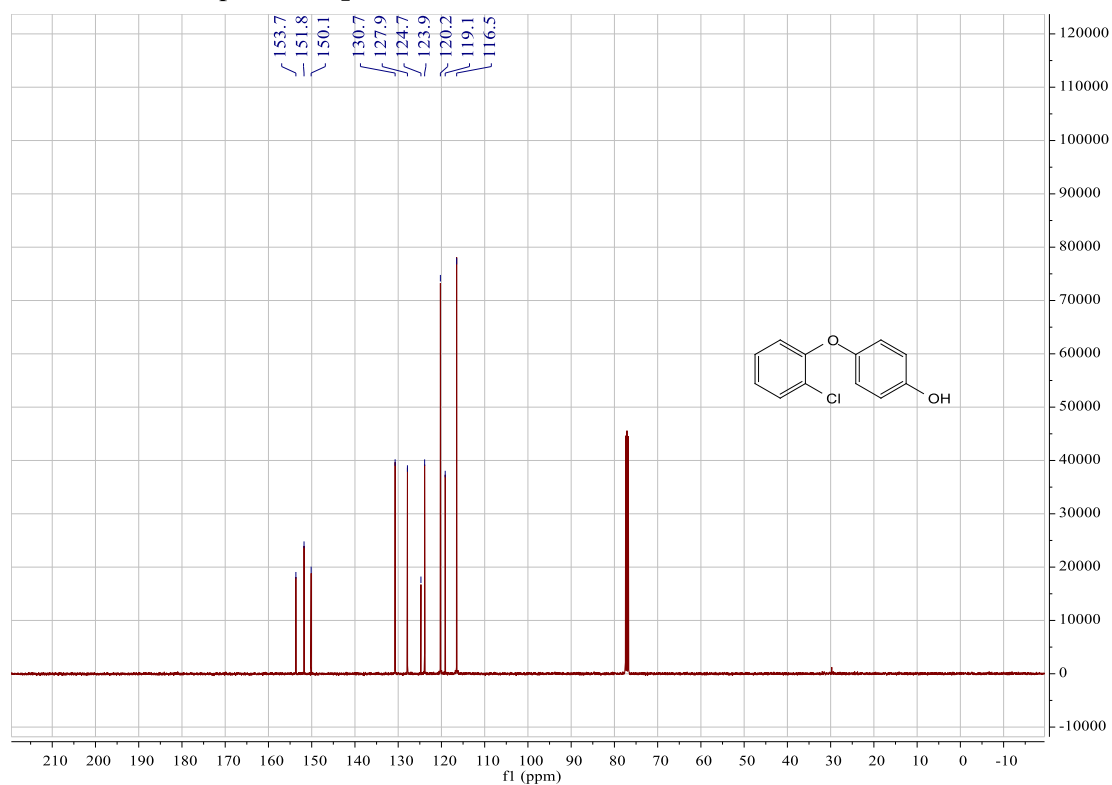

### <sup>1</sup>H NMR of compound 4ar

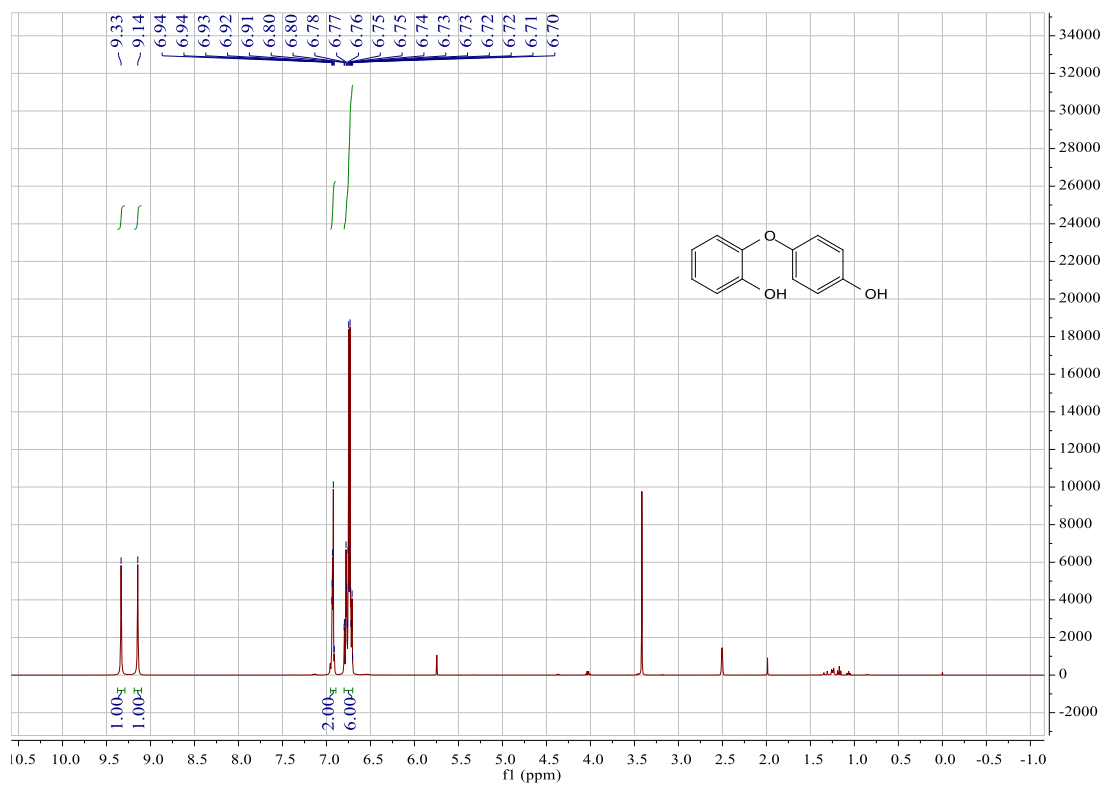

### <sup>13</sup>C NMR of compound 4ar

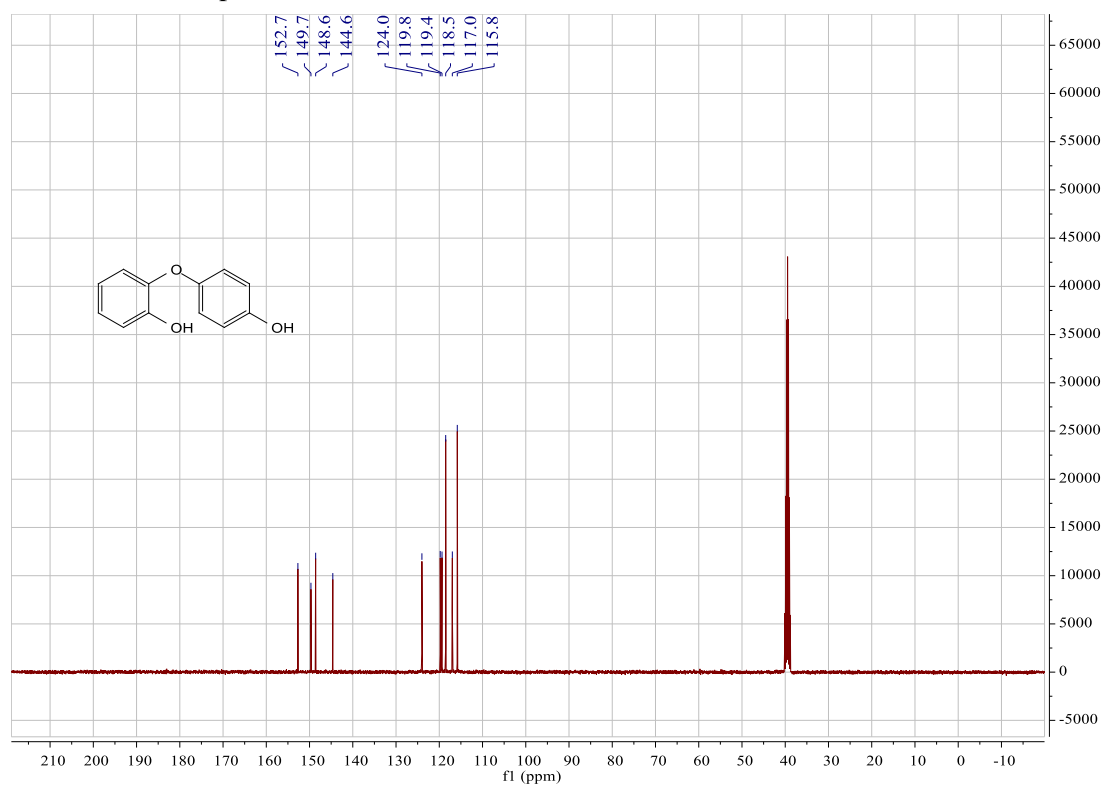

### <sup>1</sup>H NMR of compound 4as

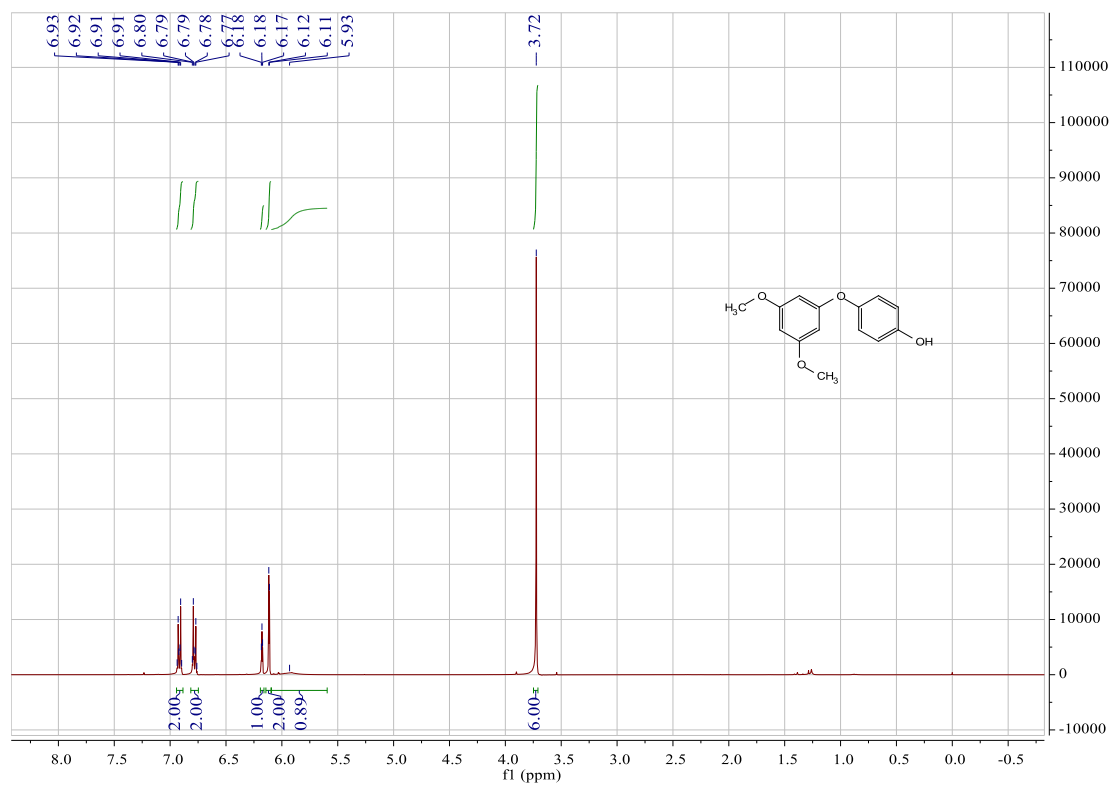

### <sup>13</sup>C NMR of compound 4as

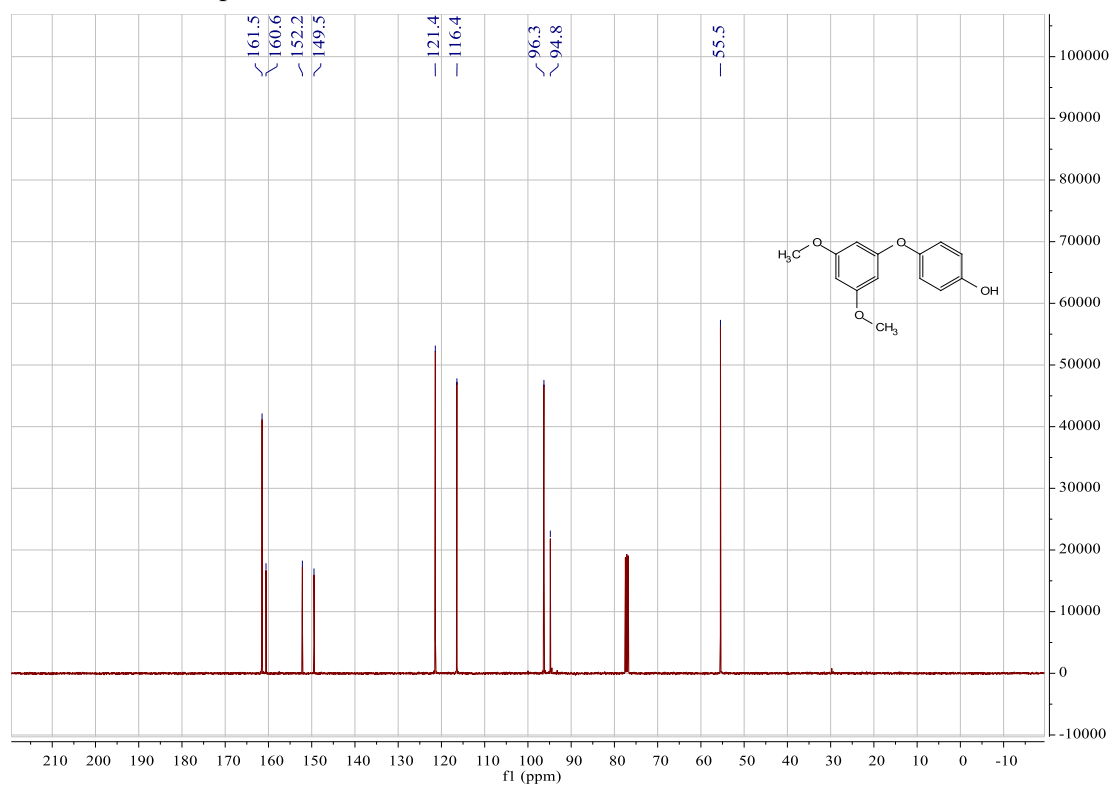



### <sup>1</sup>H NMR of compound **4at**

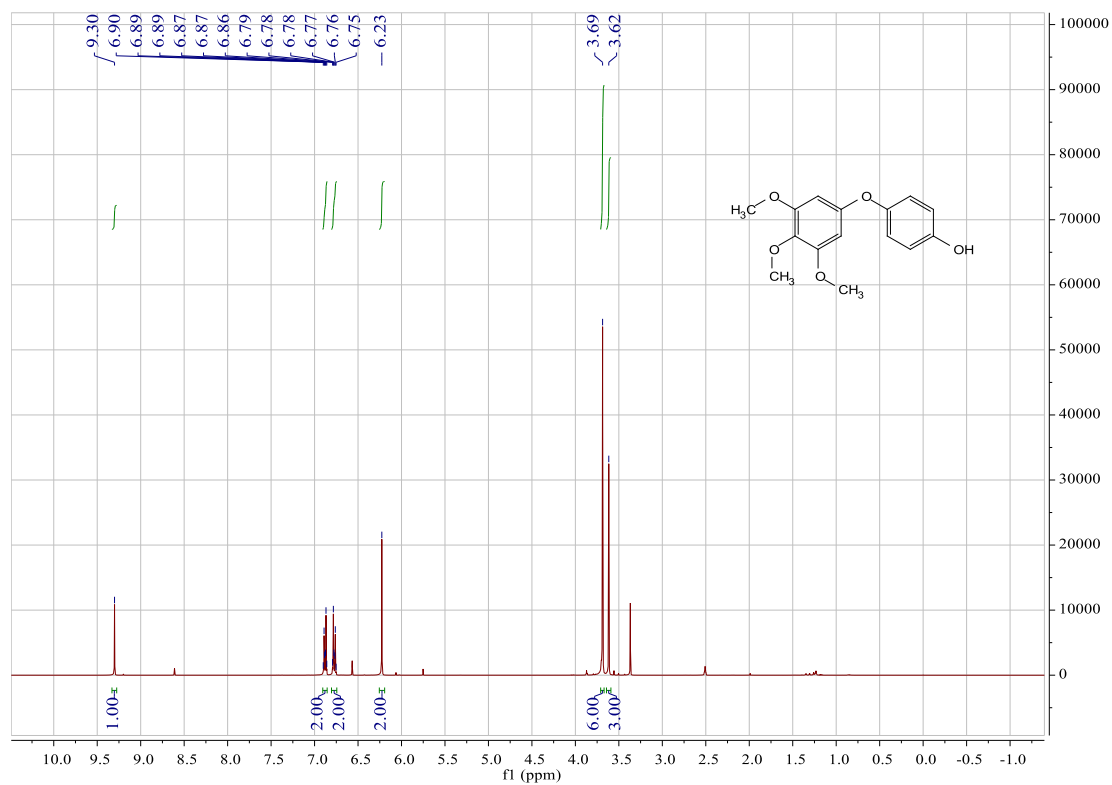

### <sup>13</sup>C NMR of compound **4at**

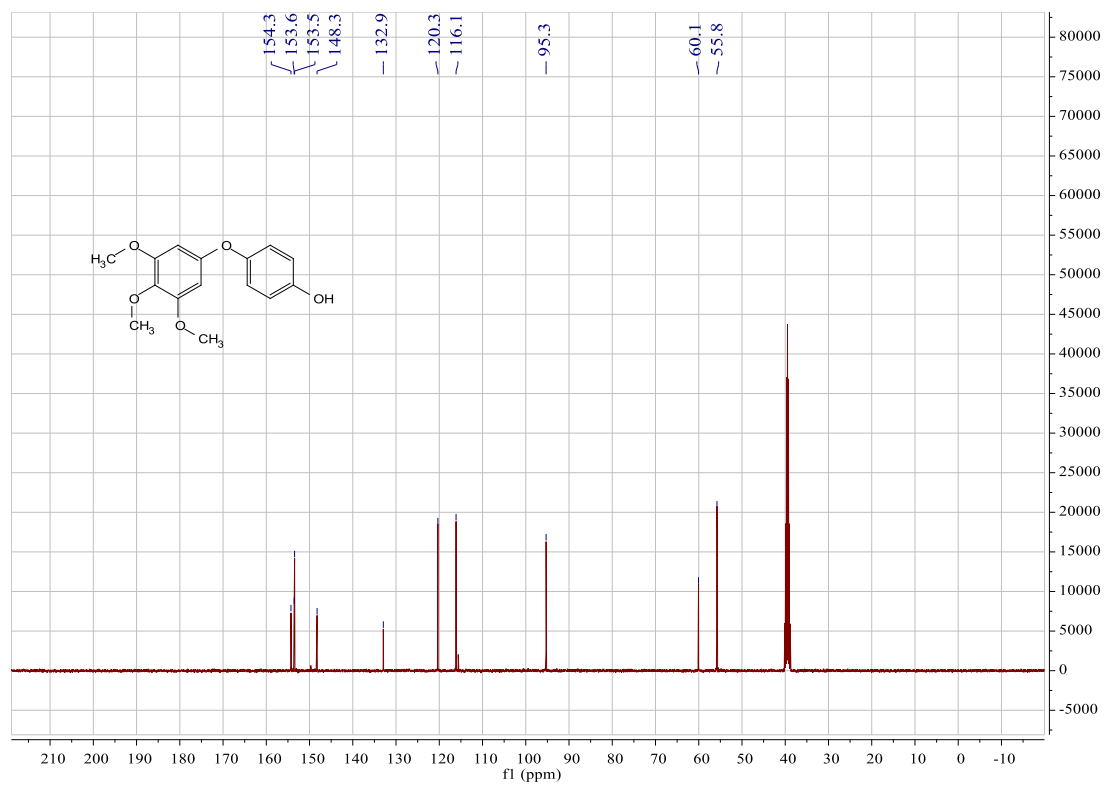

### <sup>1</sup>H NMR of compound 4au

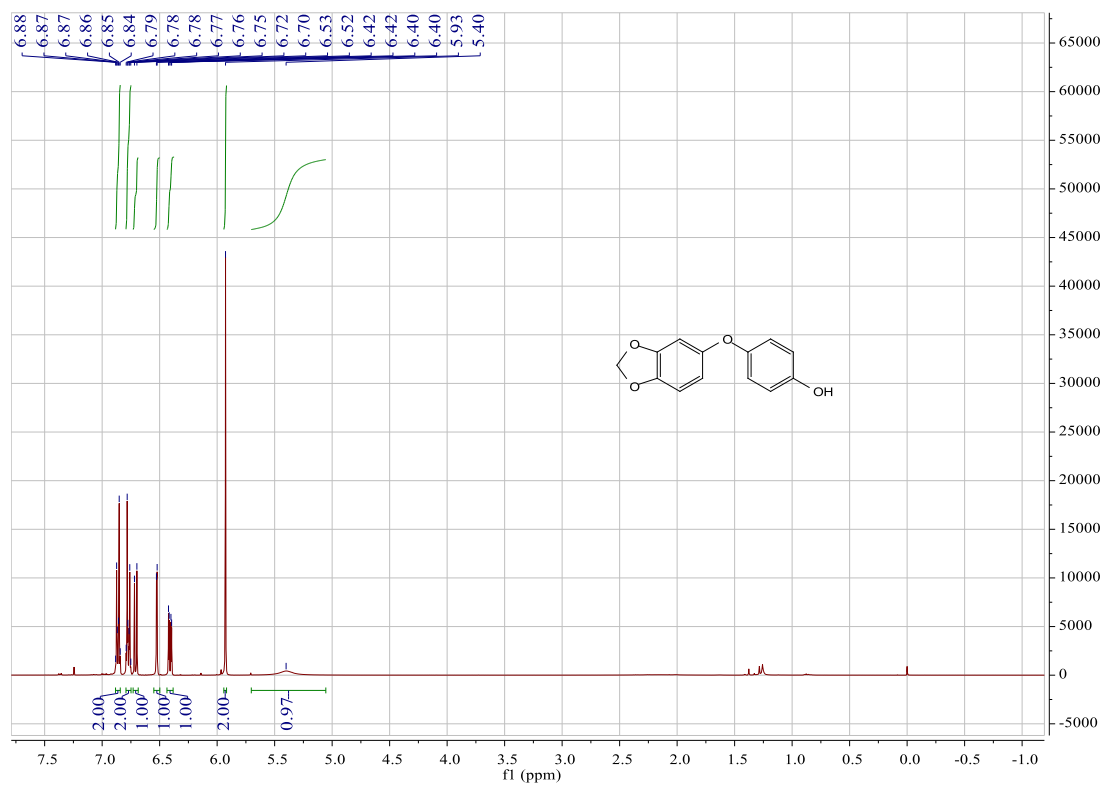

### <sup>13</sup>C NMR of compound 4au

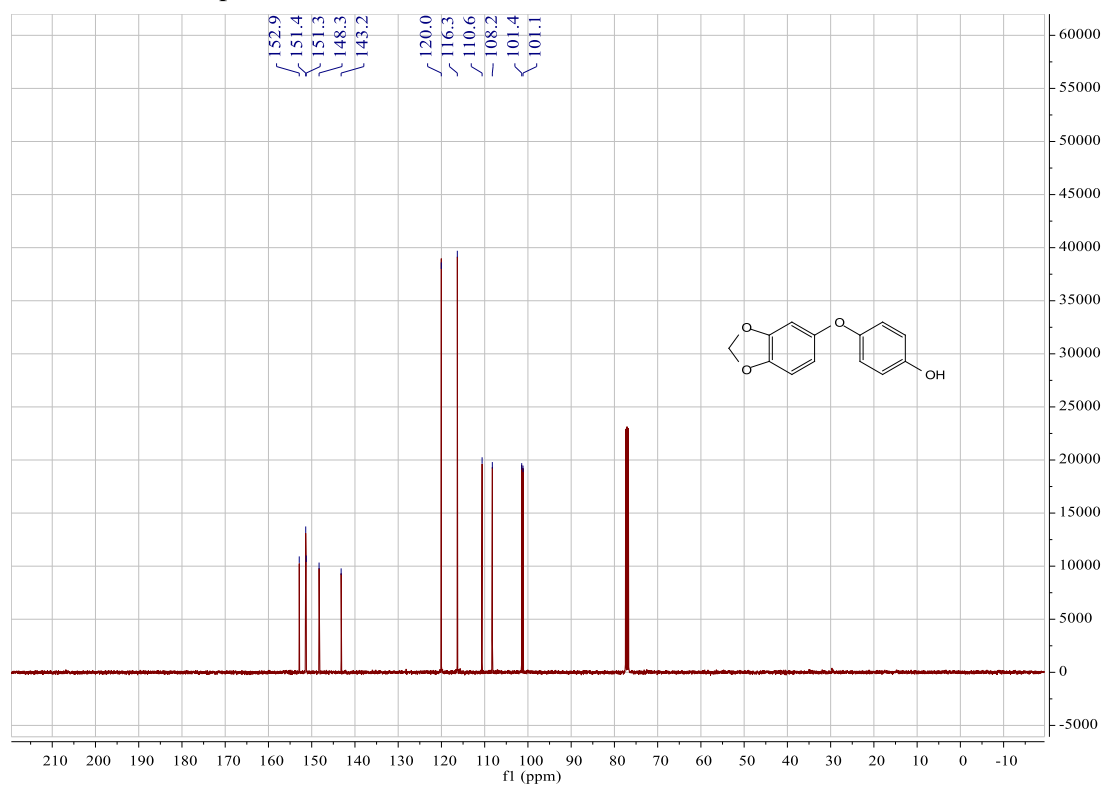

<sup>1</sup>H NMR of compound **4av**

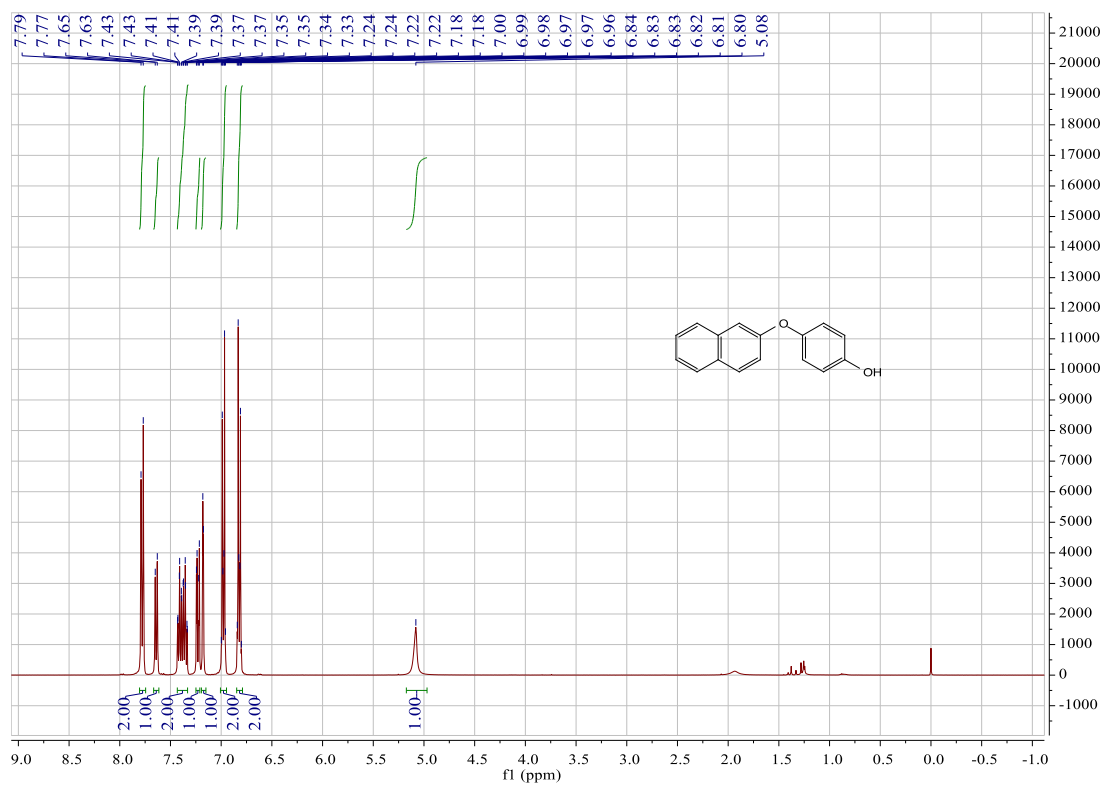

<sup>13</sup>C NMR of compound **4av**

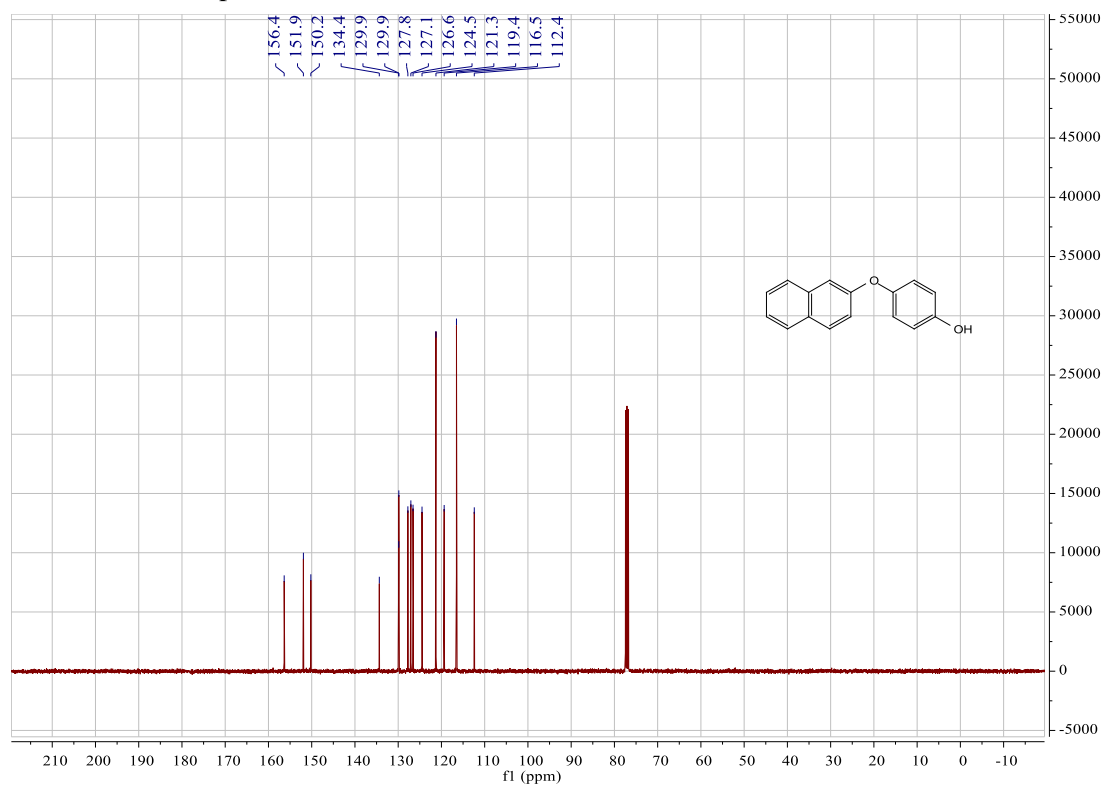

### <sup>1</sup>H NMR of compound **4aw**

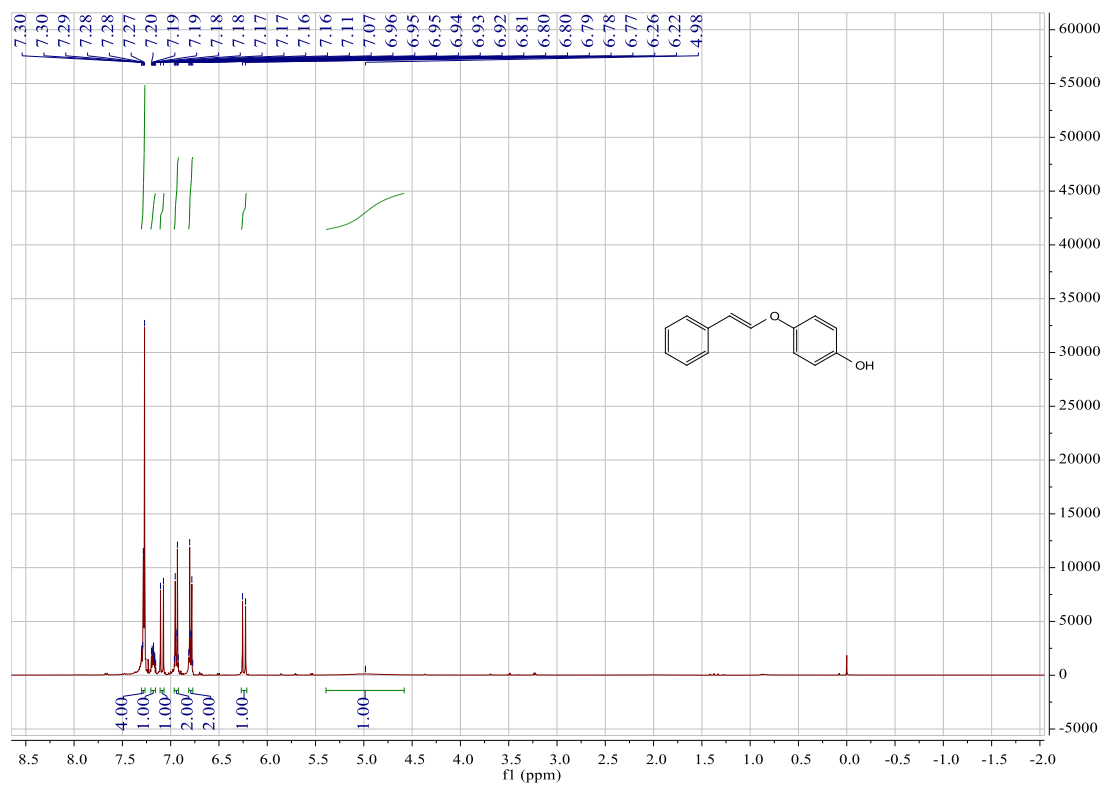

### <sup>13</sup>C NMR of compound **4aw**

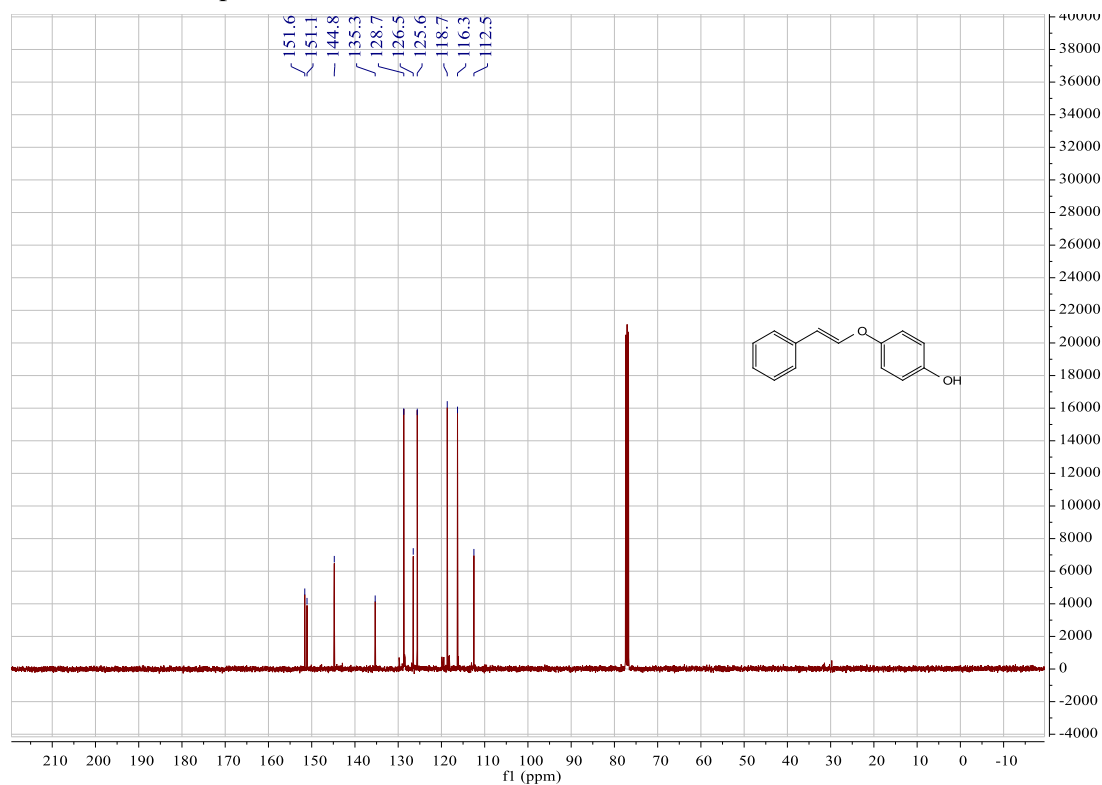

<sup>1</sup>H NMR of compound **4ba**

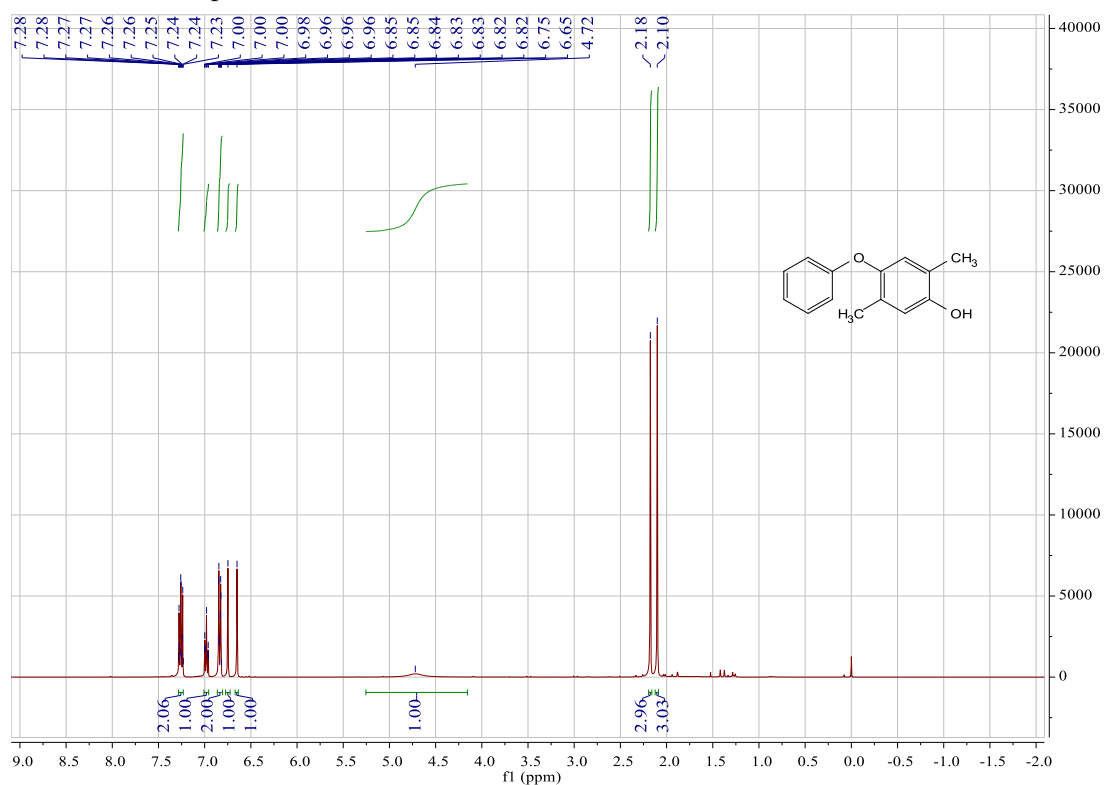

<sup>13</sup>C NMR of compound **4ba**

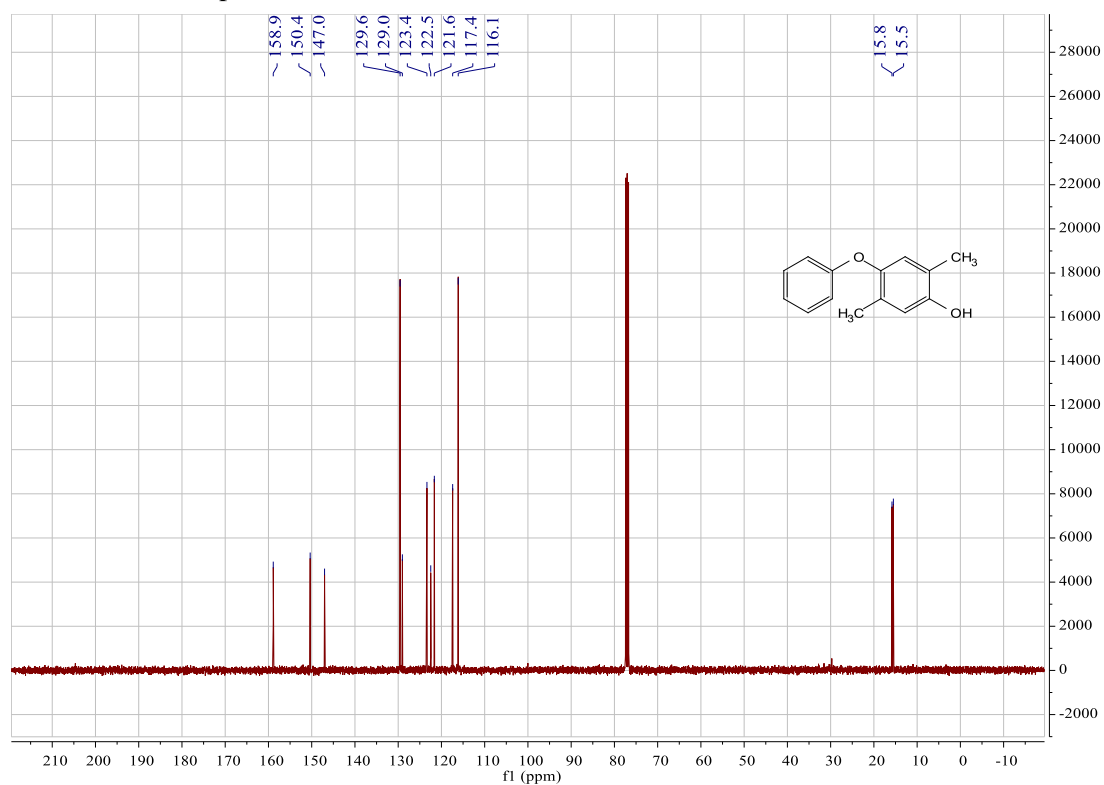

### <sup>1</sup>H NMR of compound 4ca

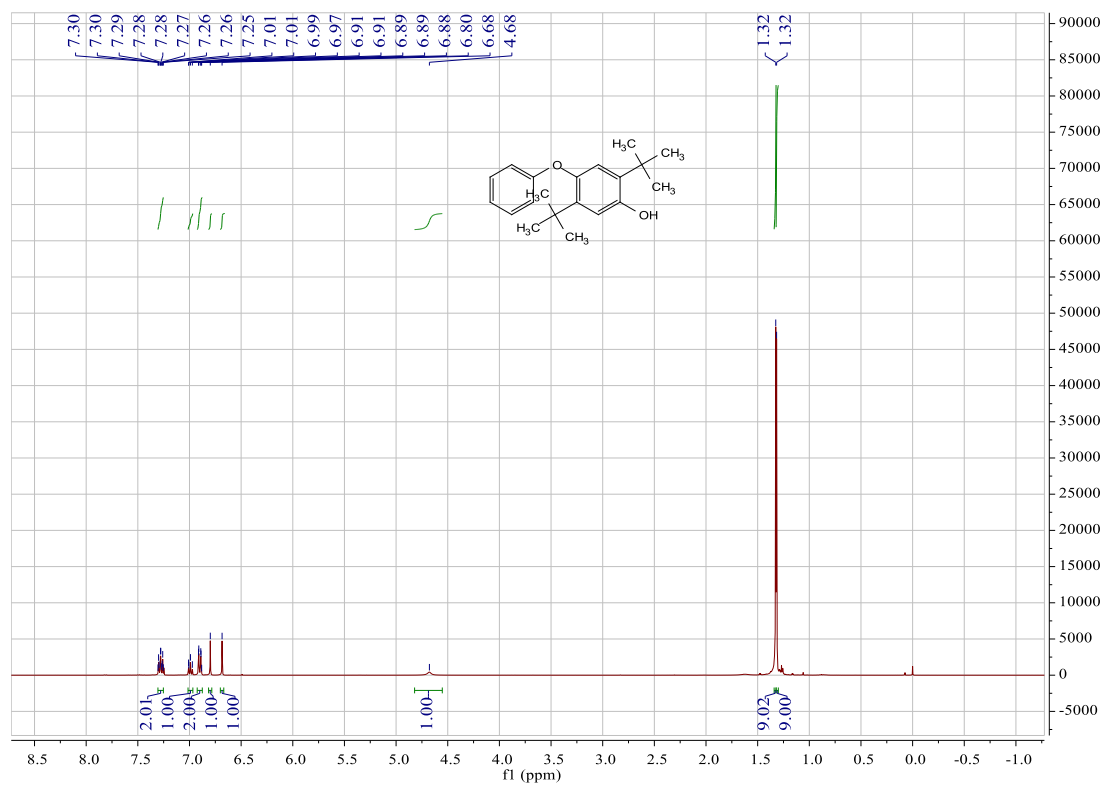

### <sup>13</sup>C NMR of compound 4ca

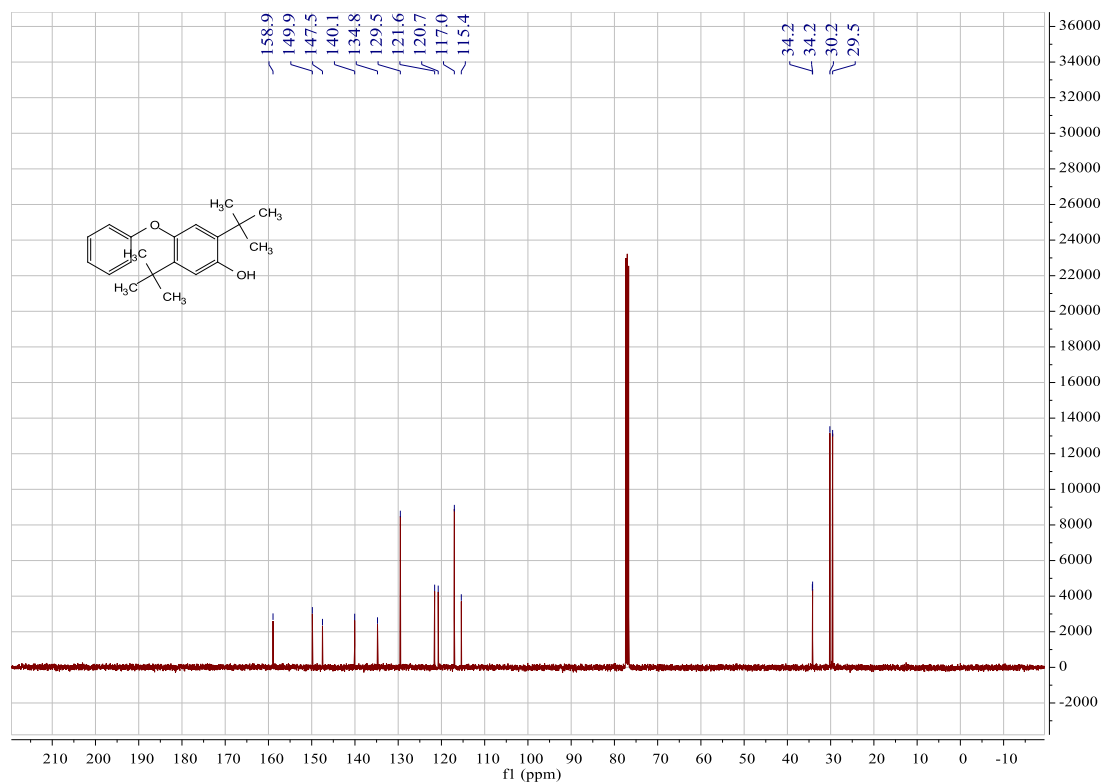

### <sup>1</sup>H NMR of compound 4da

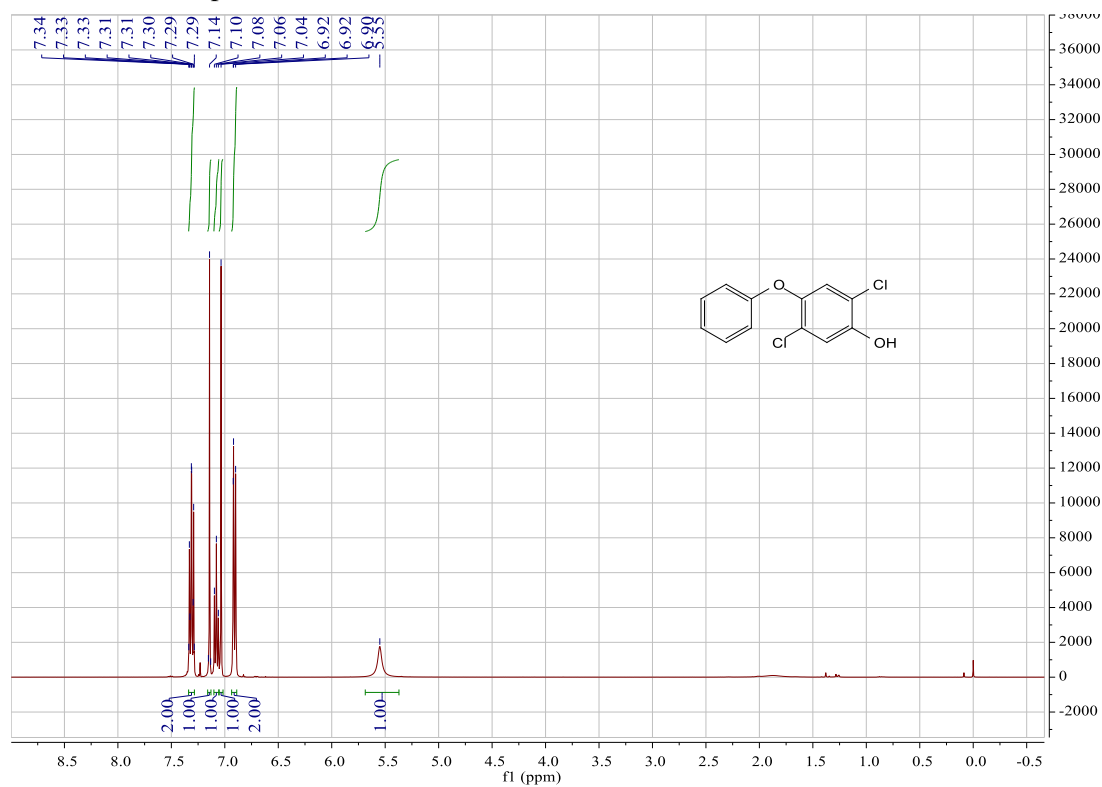

### <sup>13</sup>C NMR of compound 4da

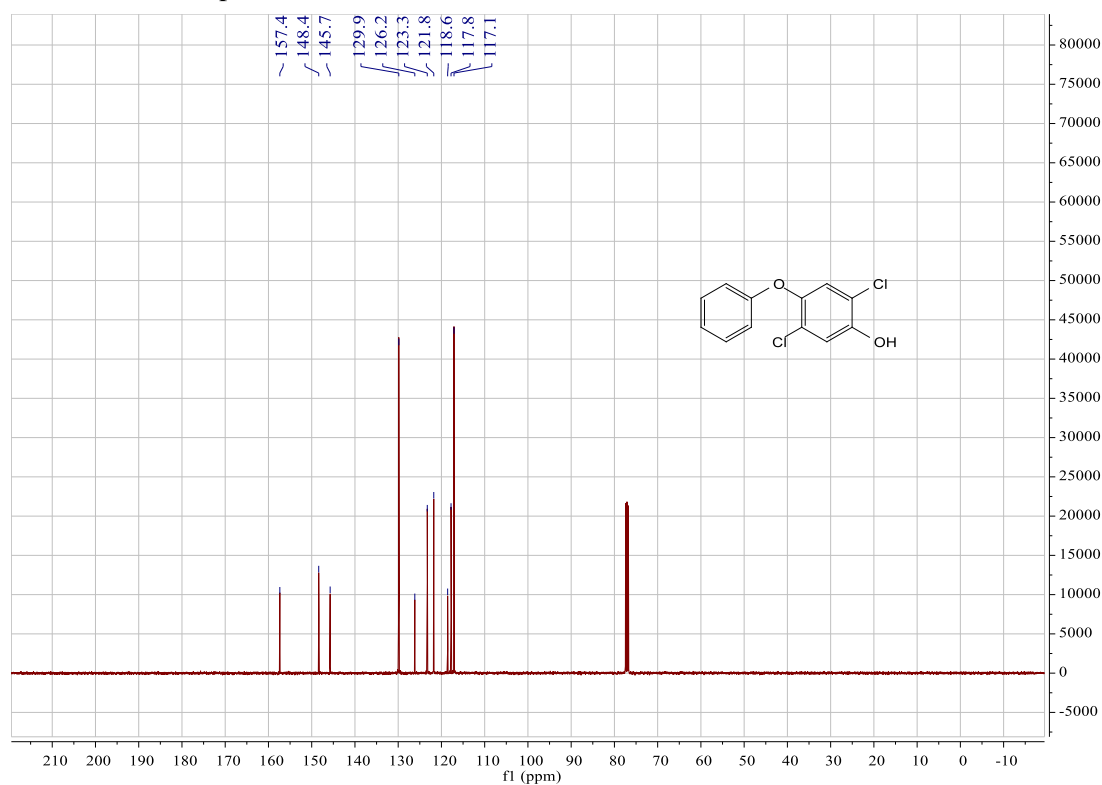

<sup>1</sup>H NMR of compound 4ea

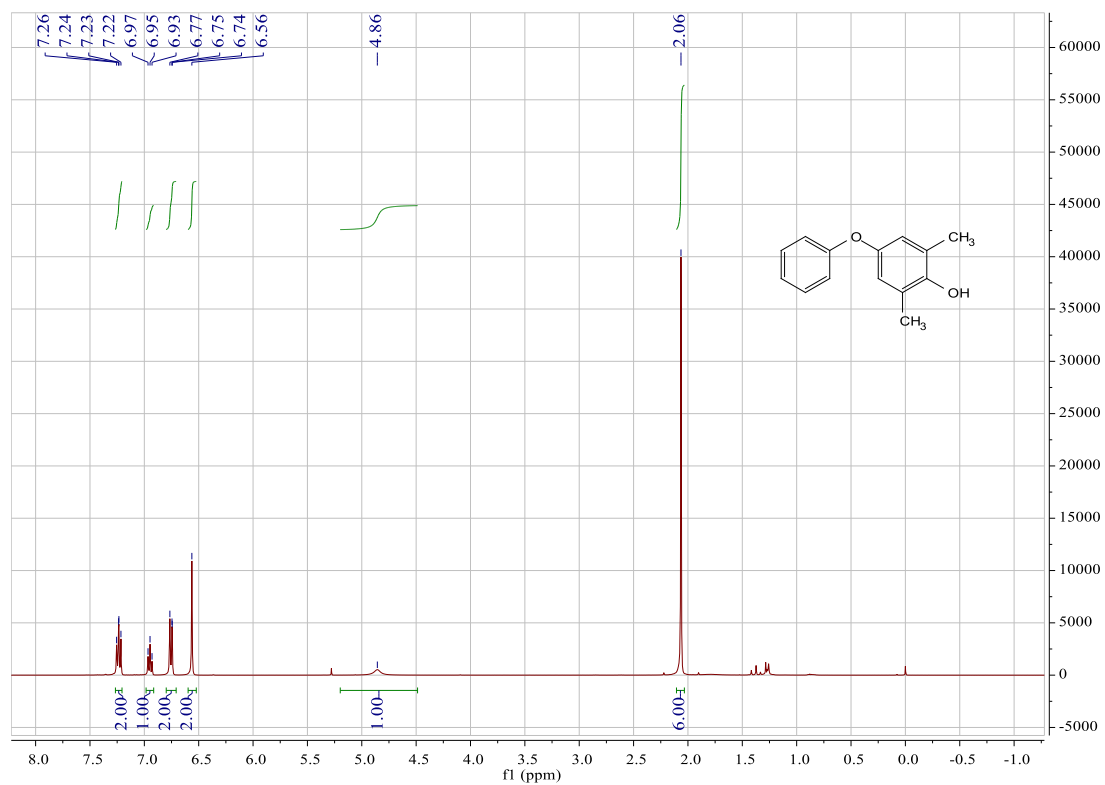

<sup>13</sup>C NMR of compound 4ea

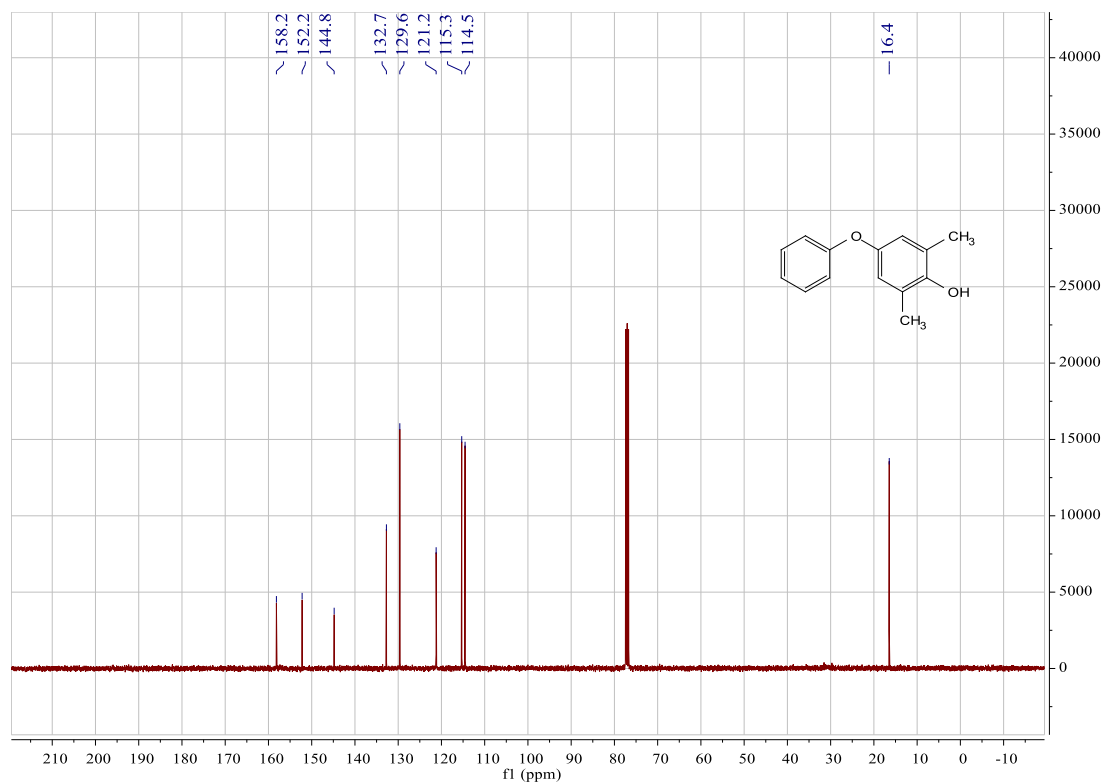



### <sup>1</sup>H NMR of compound 4fa

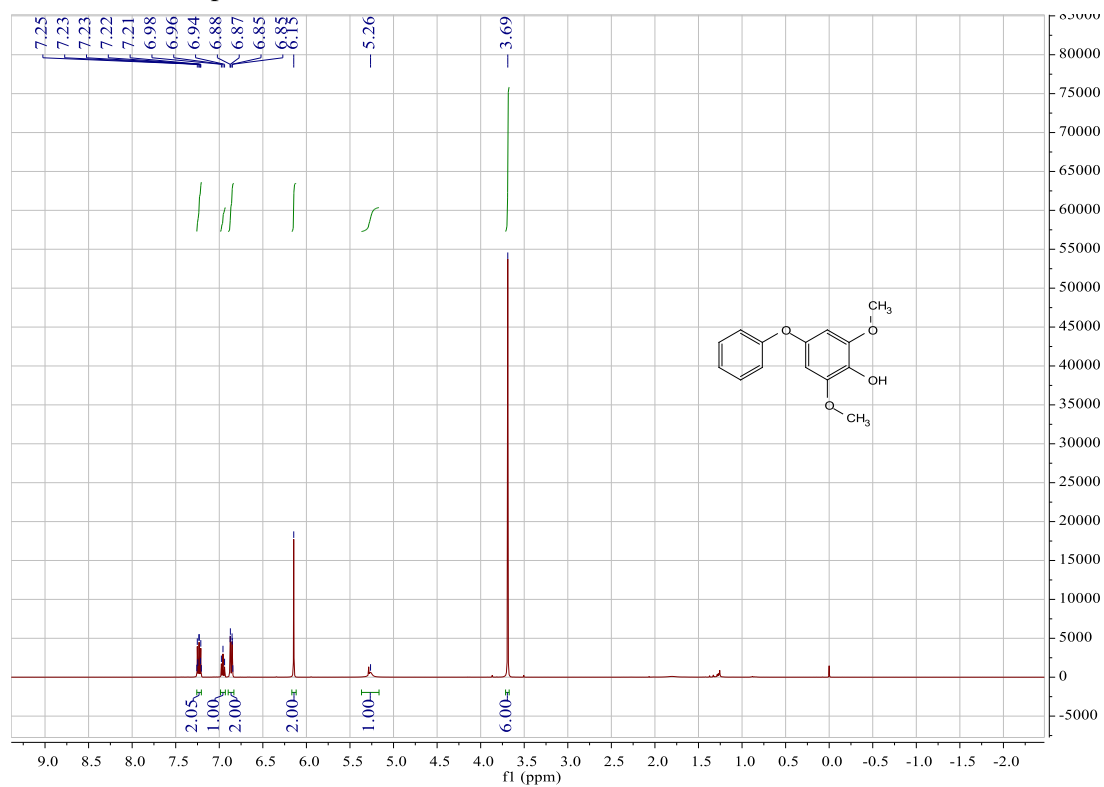

### <sup>13</sup>C NMR of compound 4fa

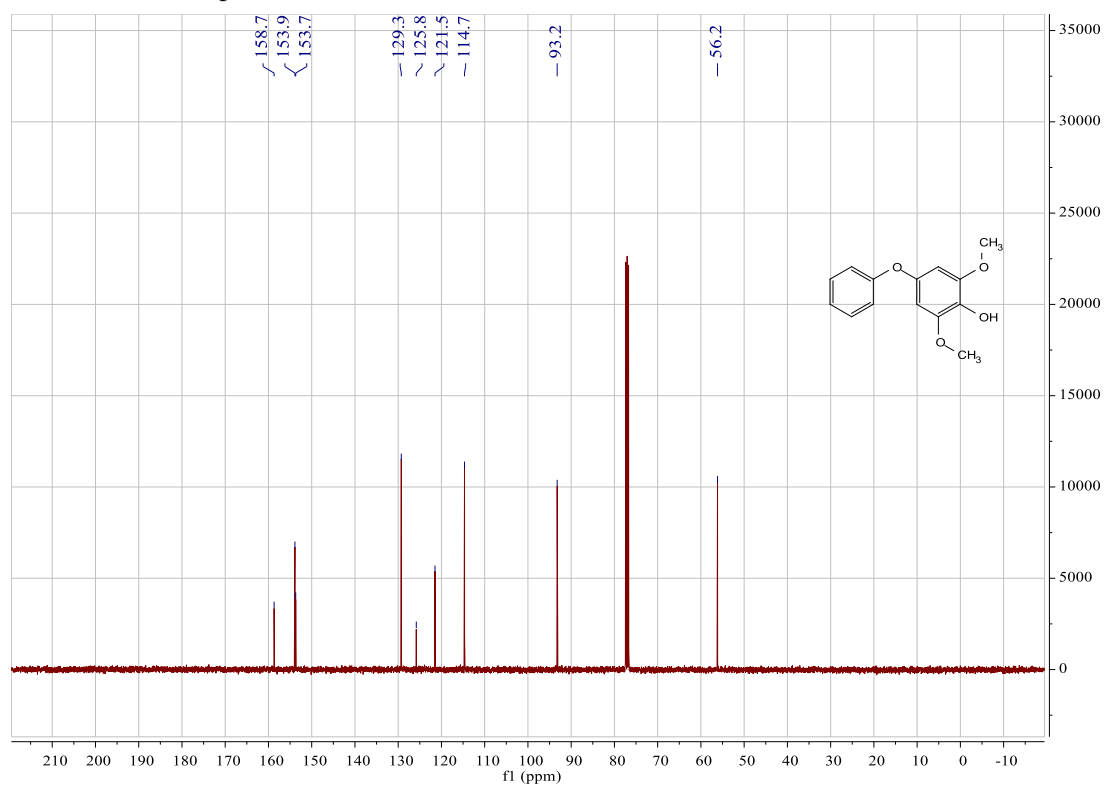

<sup>1</sup>H NMR of compound **4ga**

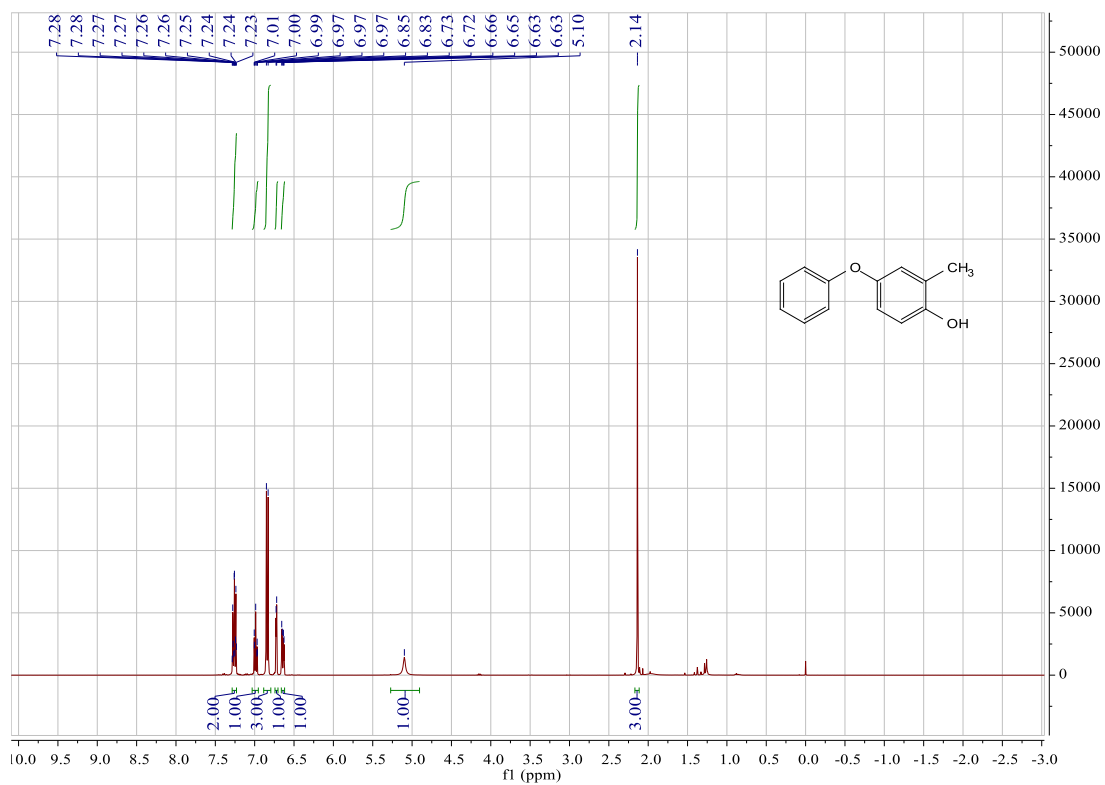

<sup>13</sup>C NMR of compound **4ga**

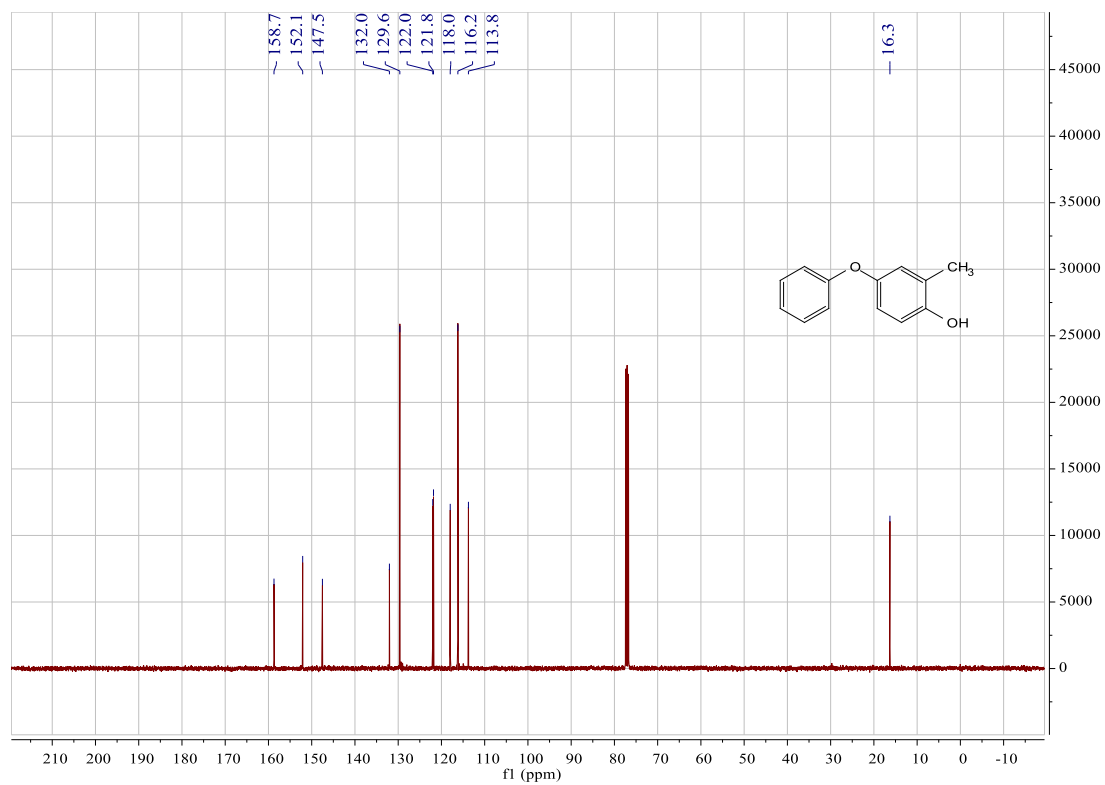

H-H NOEZY of compound **4ga**

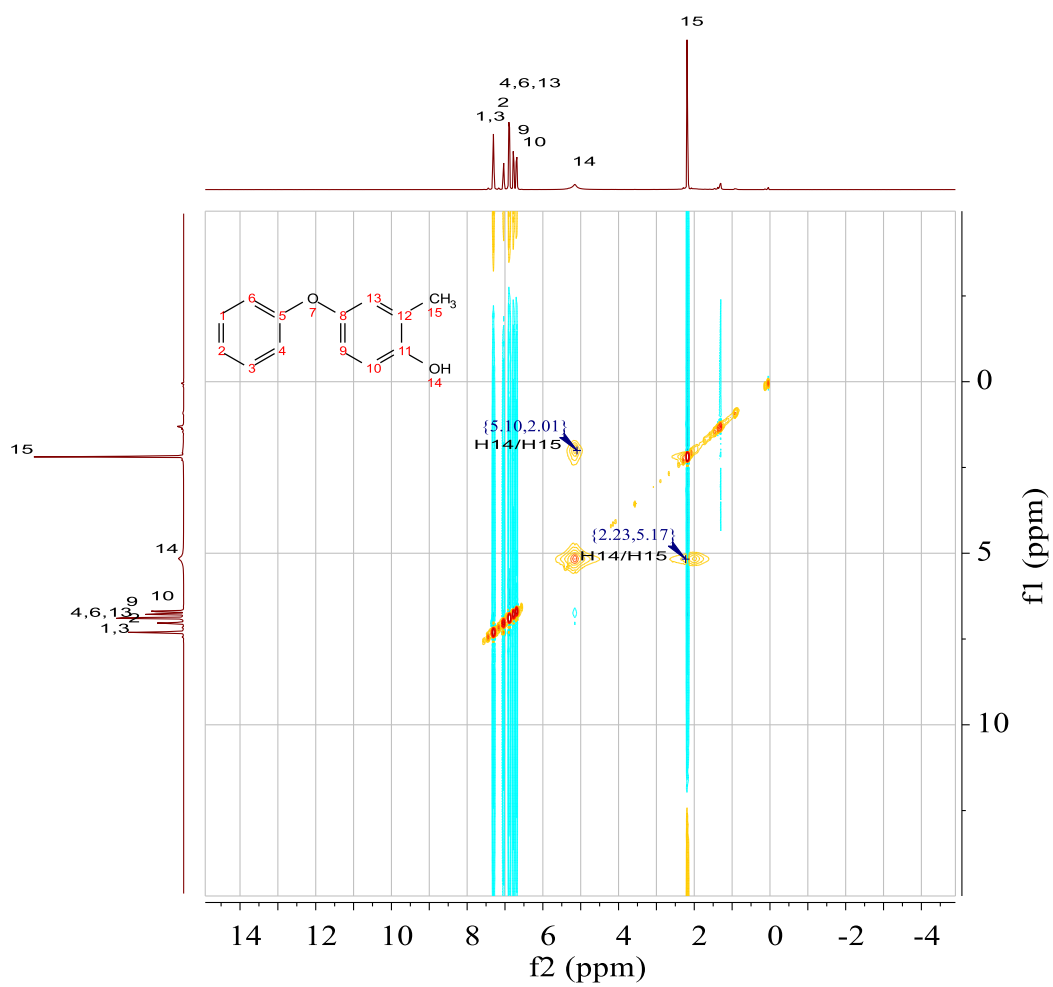



### <sup>1</sup>H NMR of compound 4ha

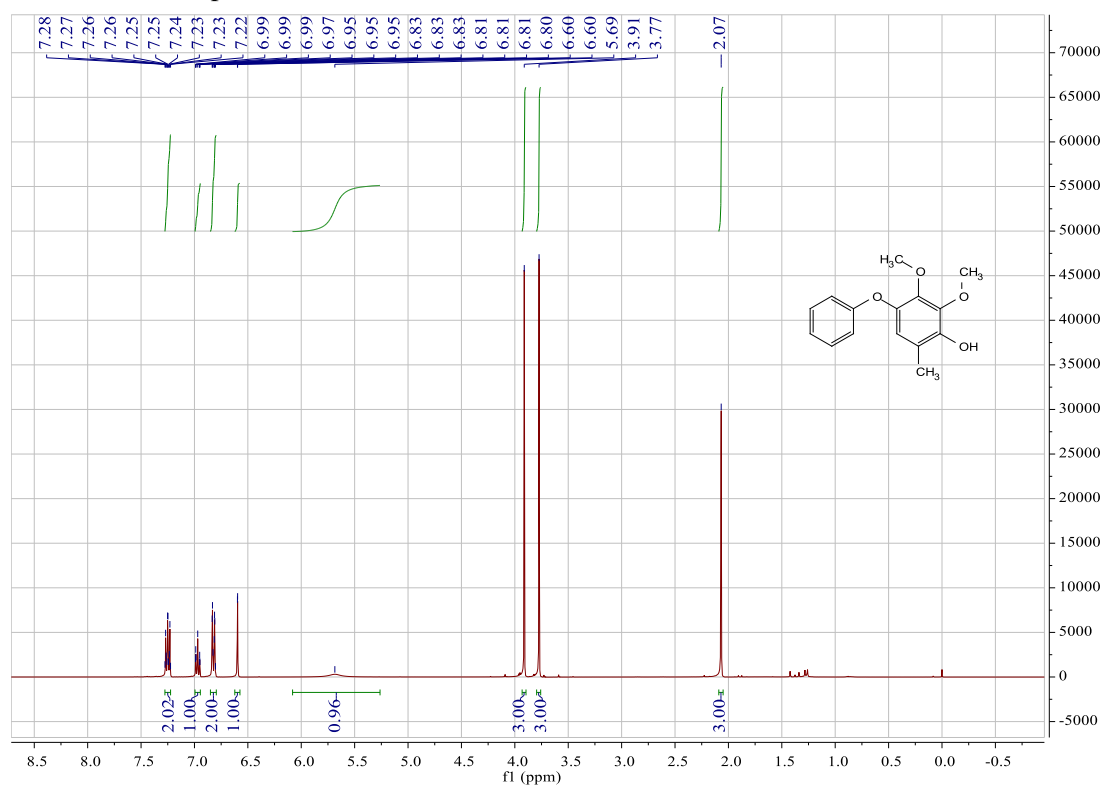

### <sup>13</sup>C NMR of compound 4ha

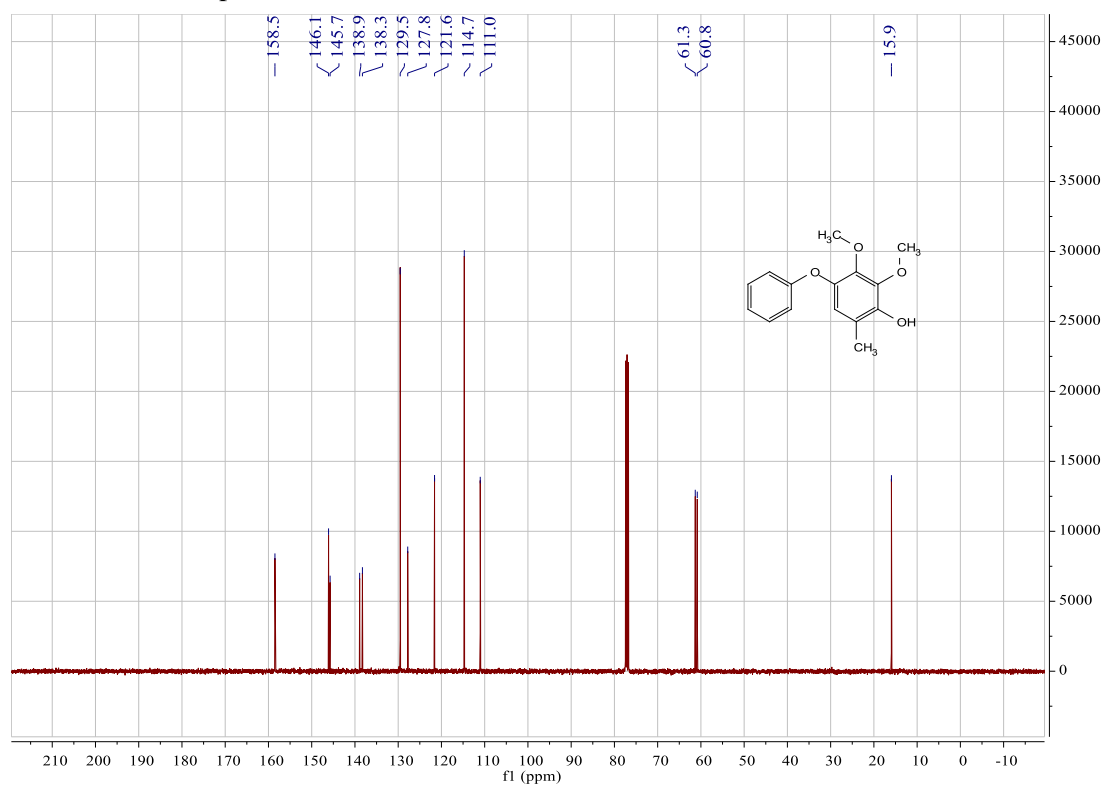

H-H NOEZY of compound **4ha**

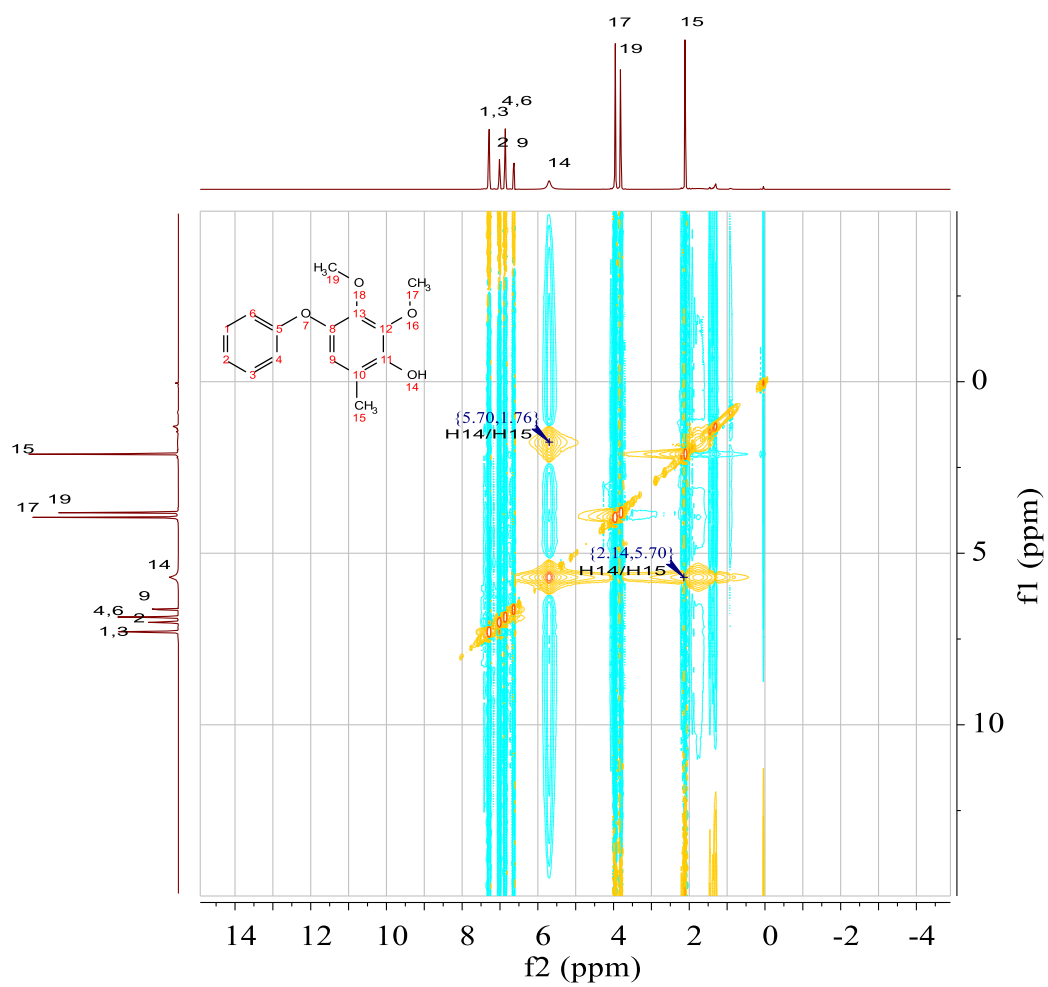

<sup>1</sup>H NMR of compound **4ha**'

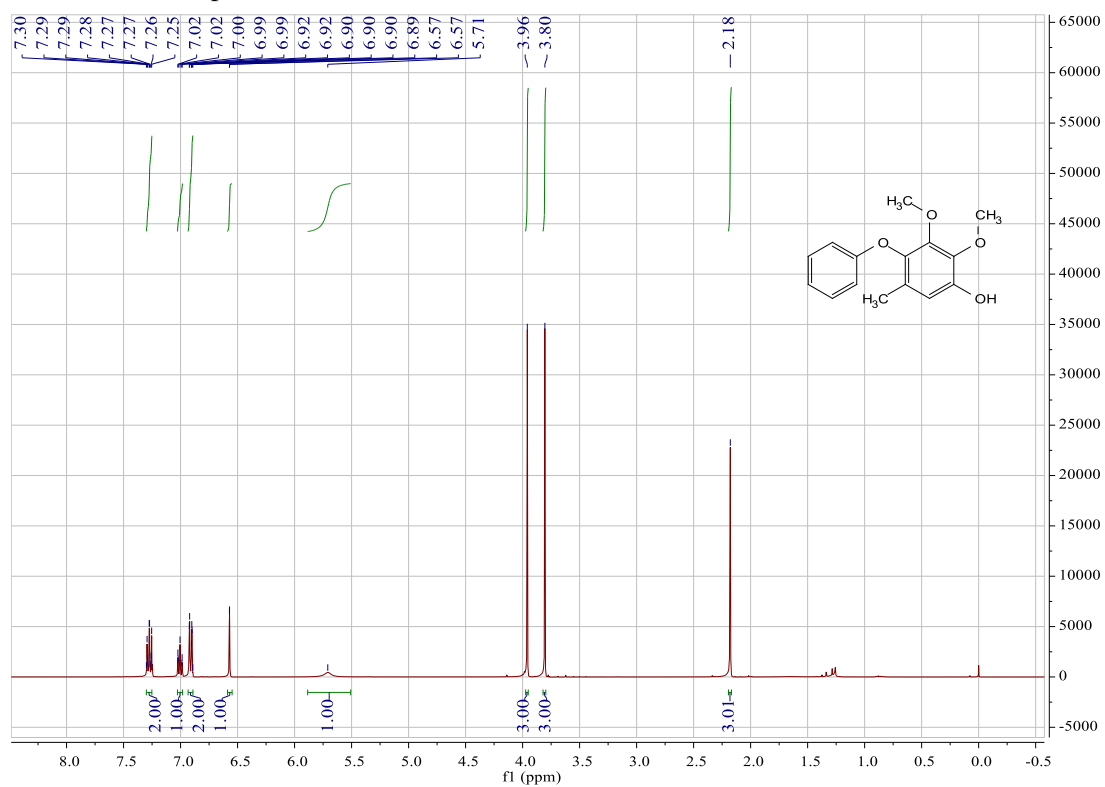

<sup>13</sup>C NMR of compound **4ha**'

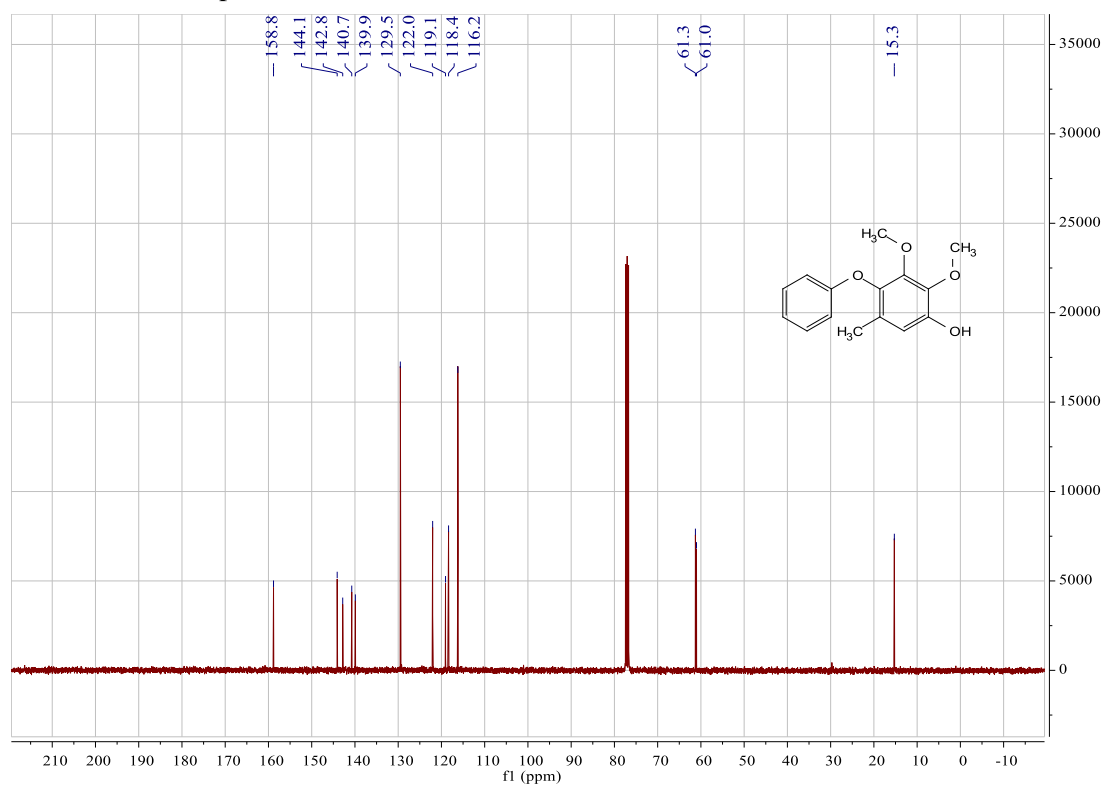

<sup>1</sup>H NMR of compound **5aa**

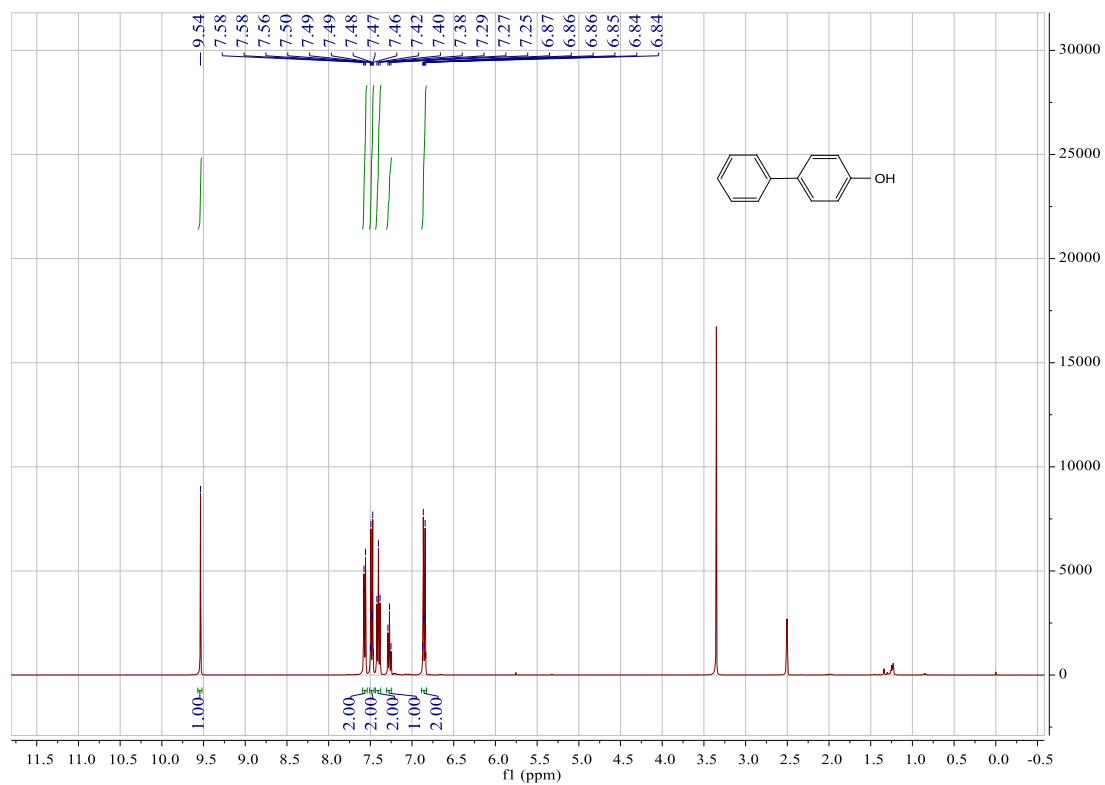

<sup>13</sup>C NMR of compound **5aa**

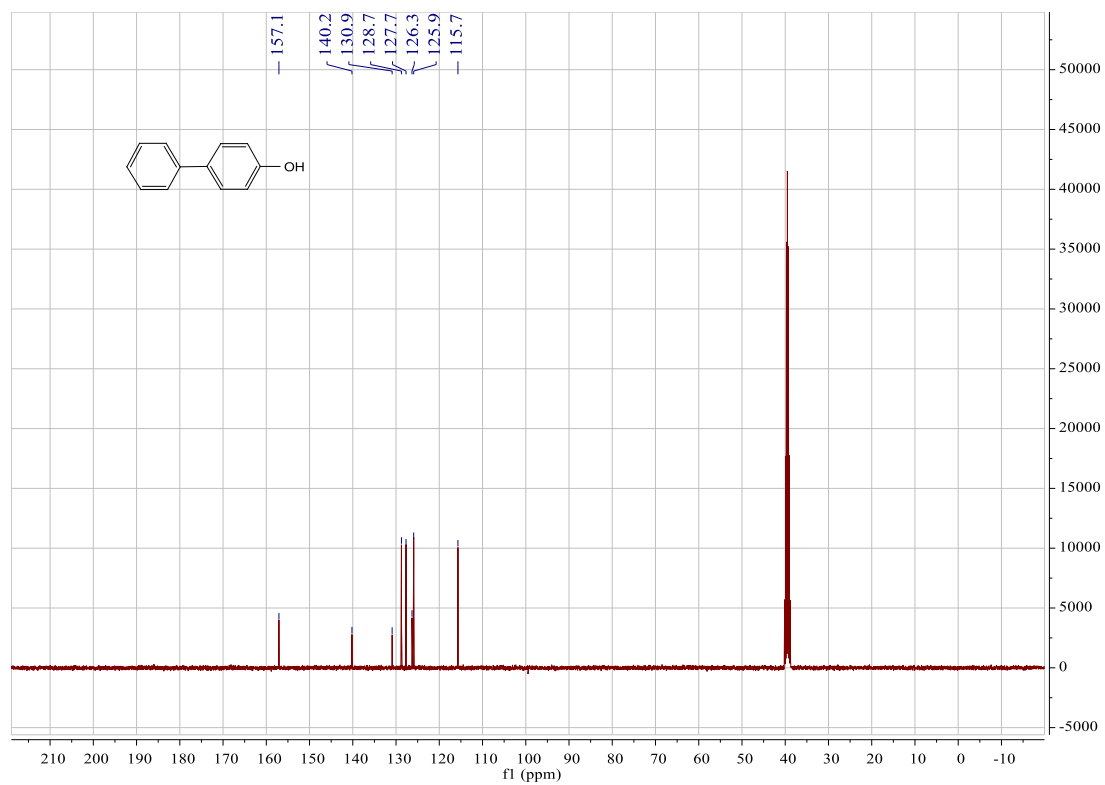



### <sup>1</sup>H NMR of compound **5ab**

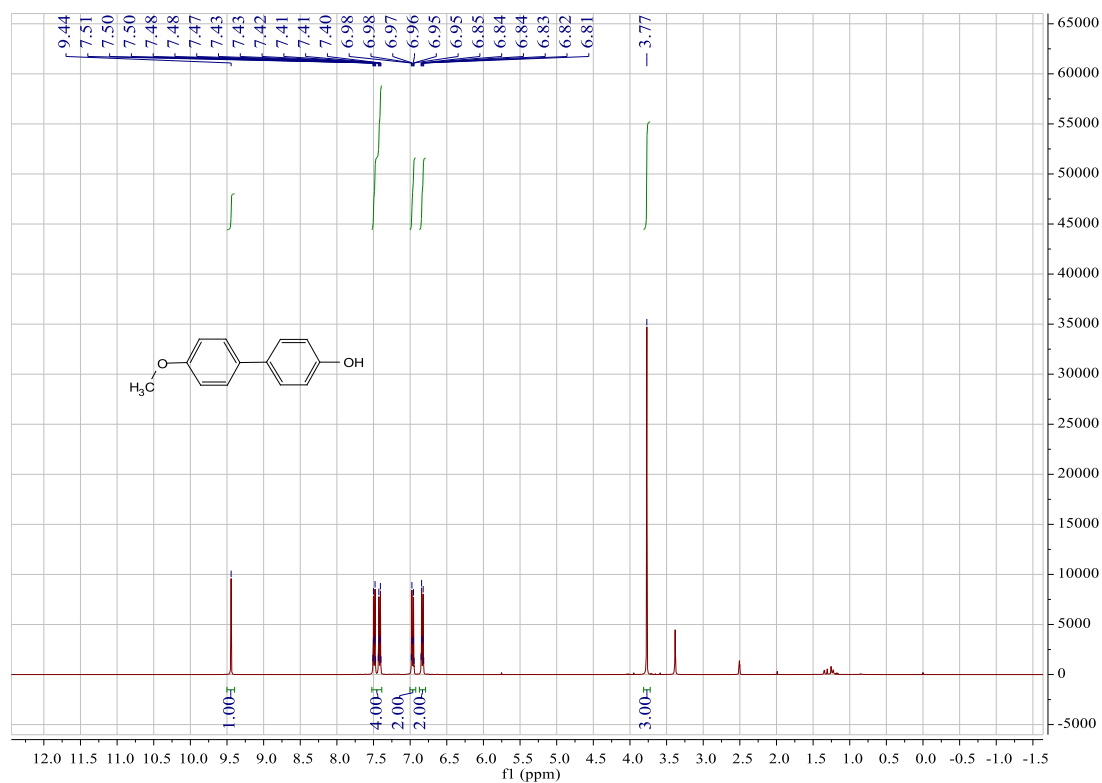

### <sup>13</sup>C NMR of compound **5ab**

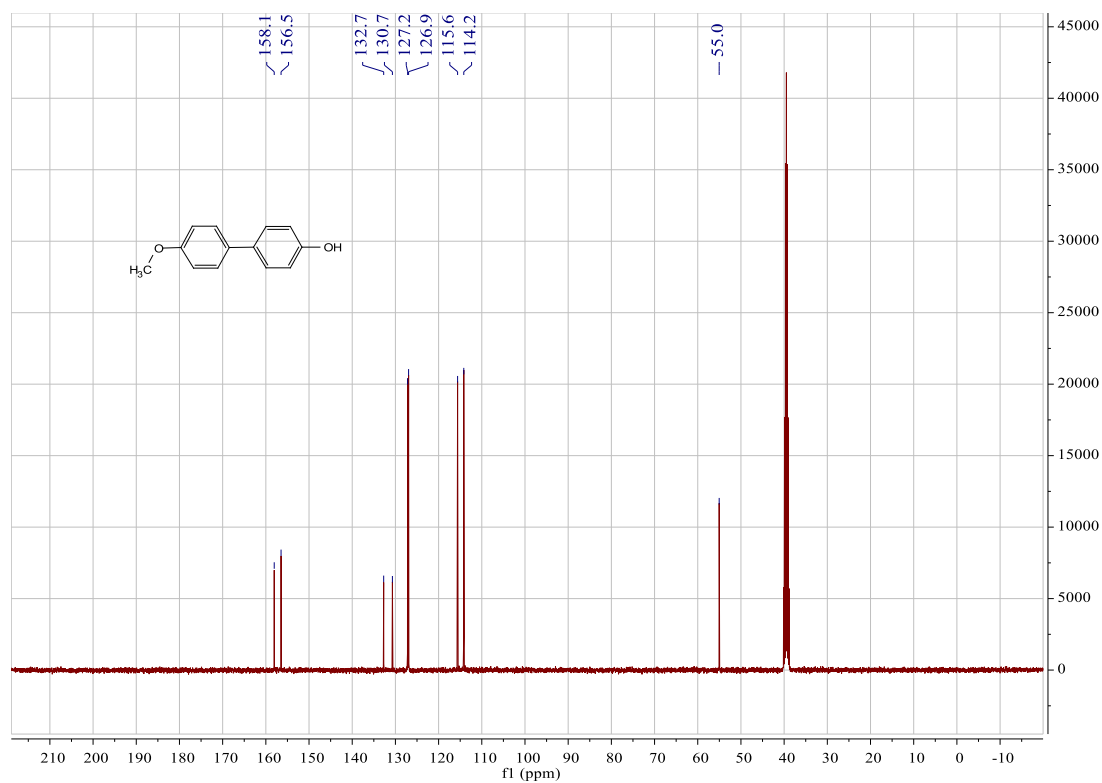

<sup>1</sup>H NMR of compound **5ac**

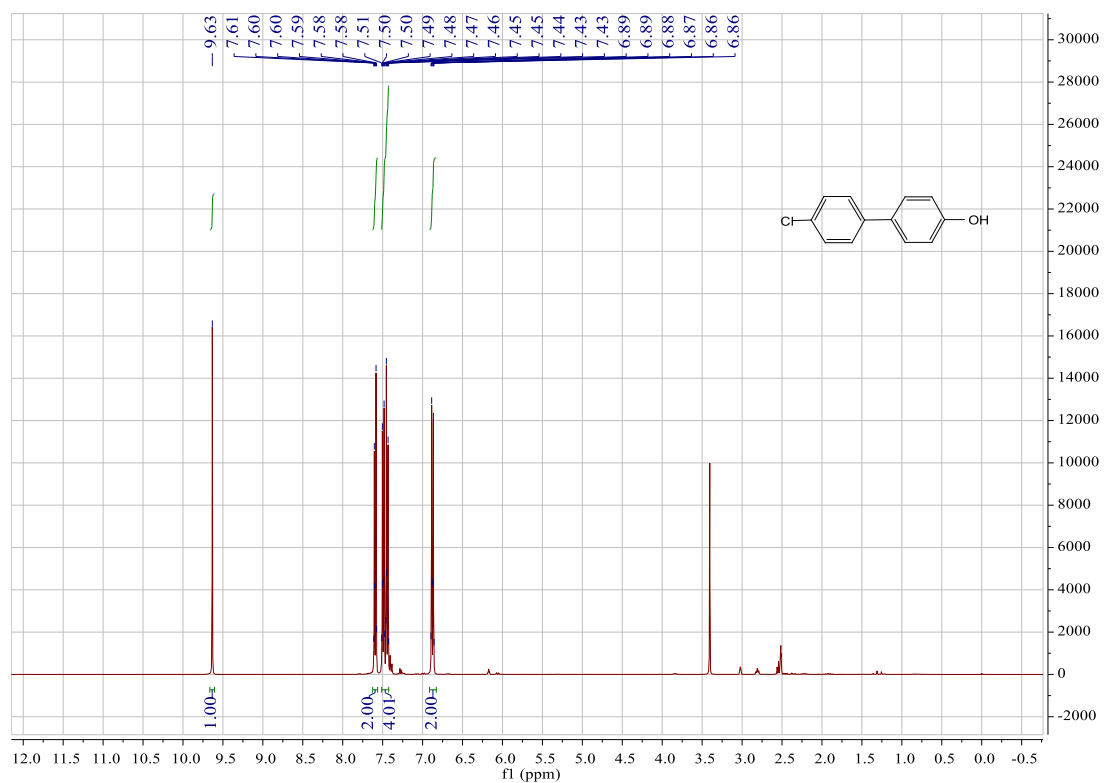

<sup>13</sup>C NMR of compound **5ac**

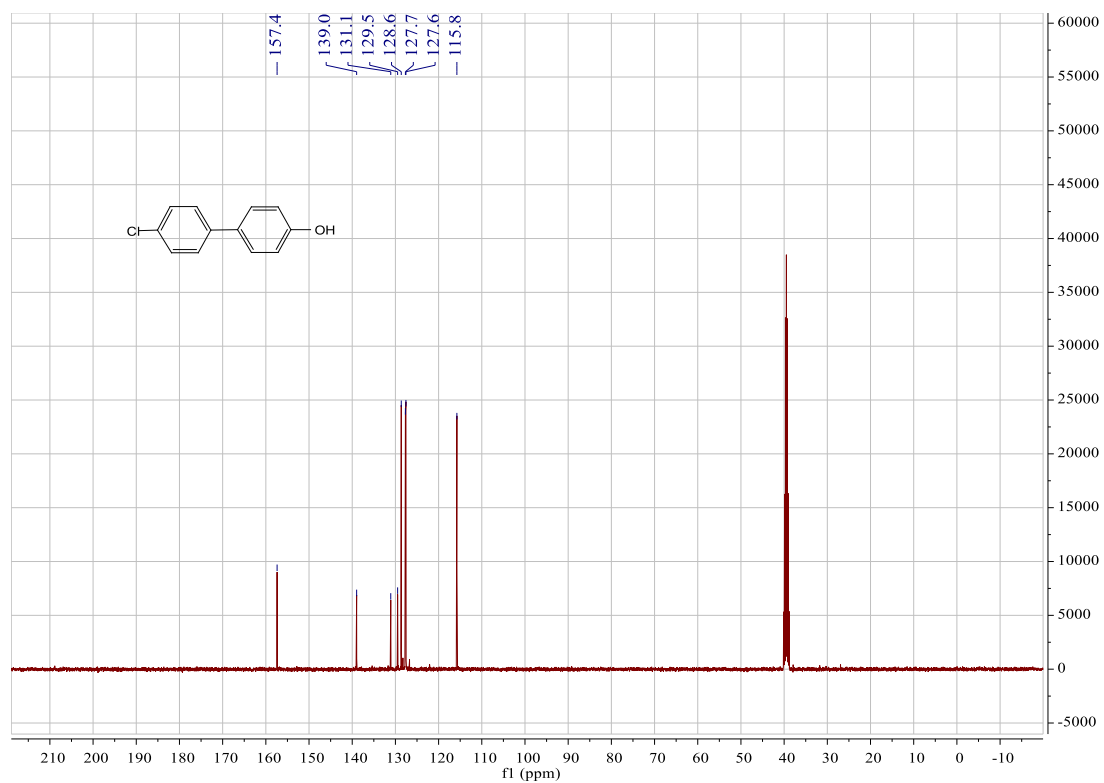

### <sup>1</sup>H NMR of compound **5ad**

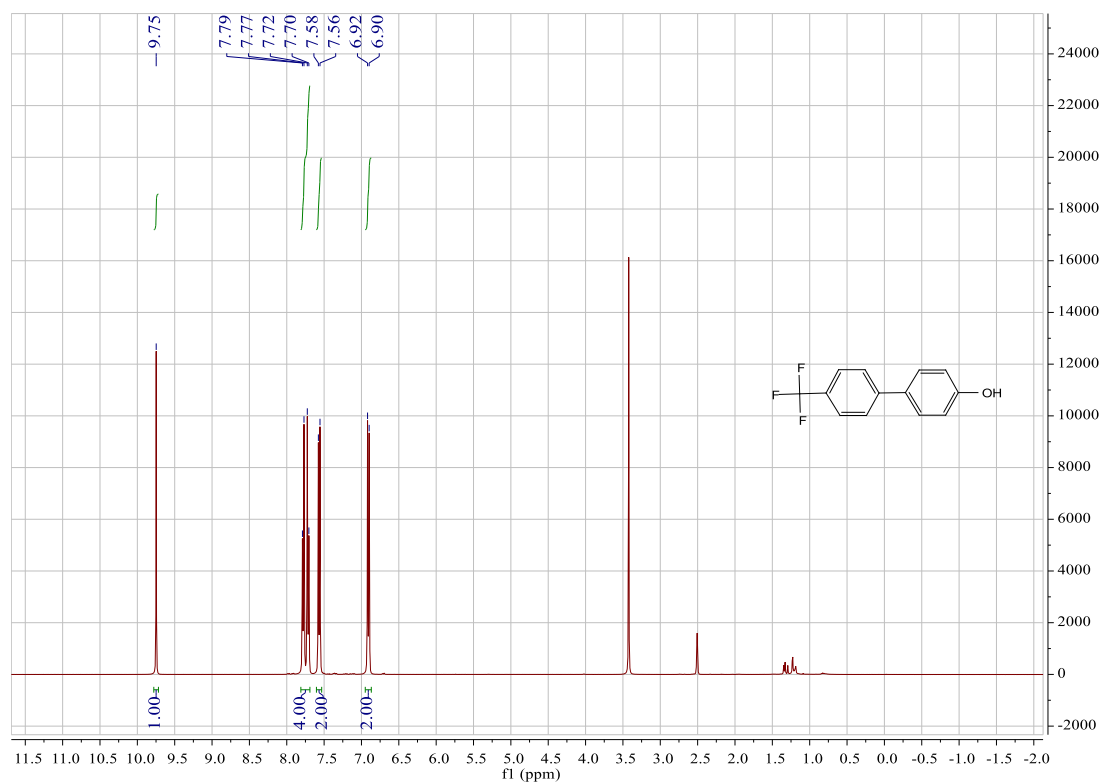

### <sup>13</sup>C NMR of compound **5ad**

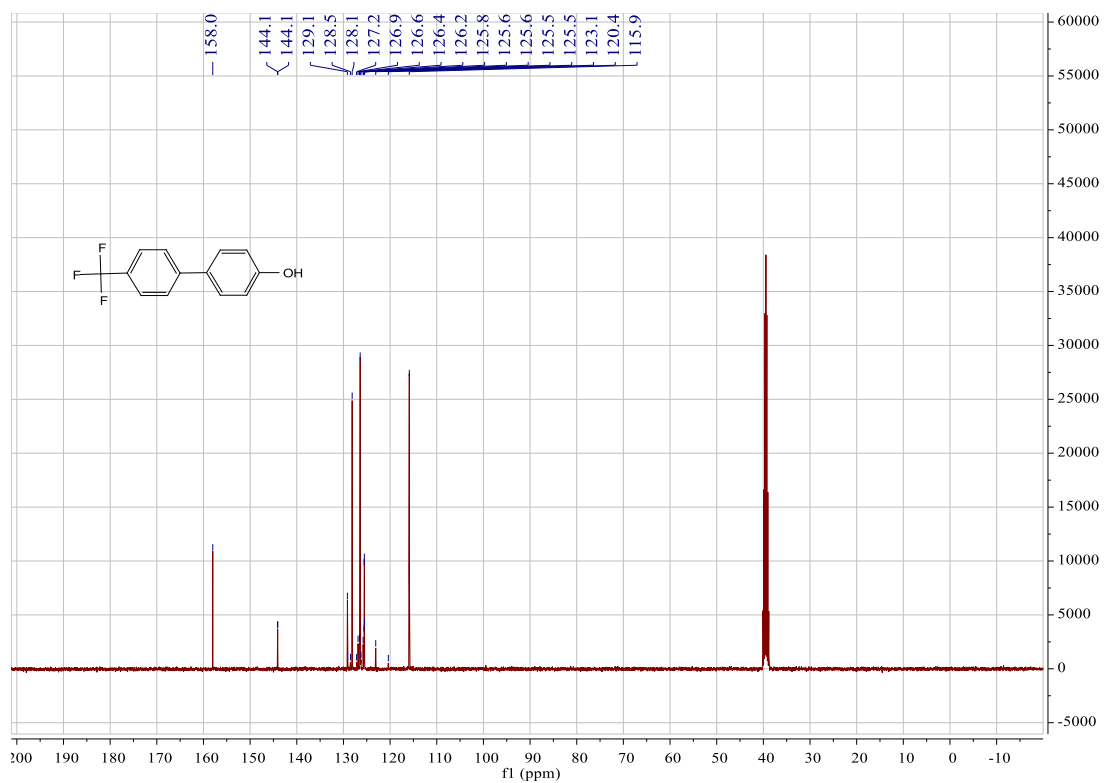

<sup>1</sup>H NMR of compound **5ae**

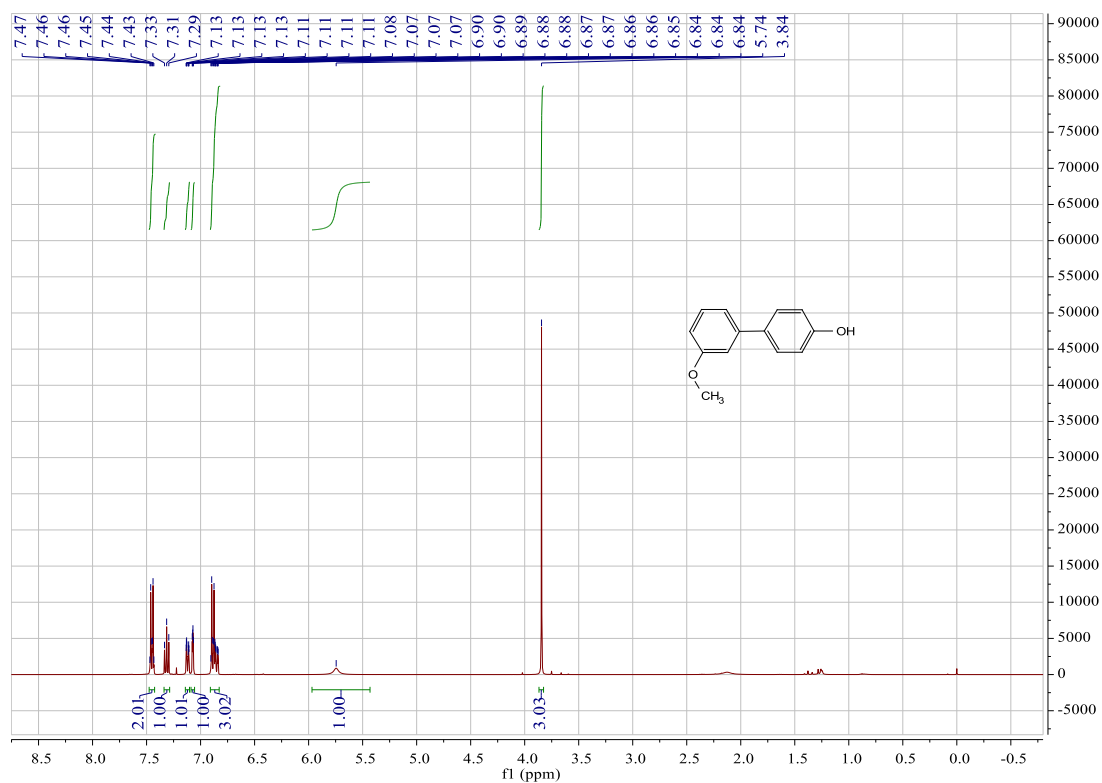

<sup>13</sup>C NMR of compound **5ae**

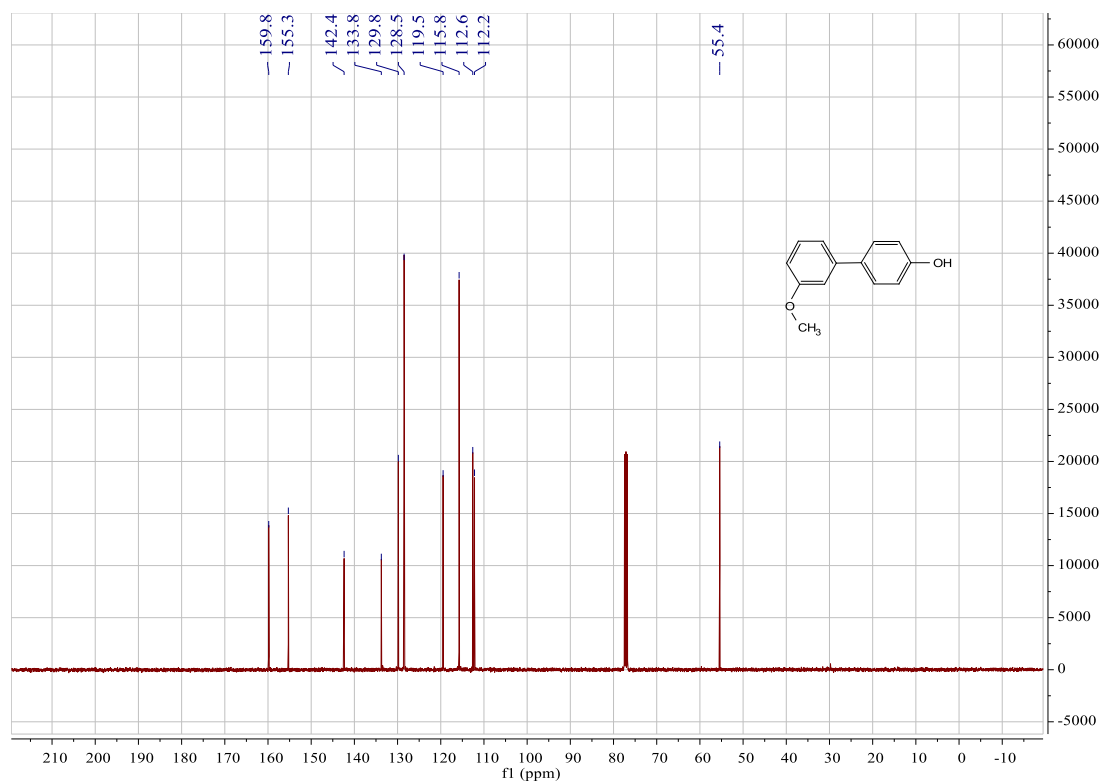

### <sup>1</sup>H NMR of compound **5af**

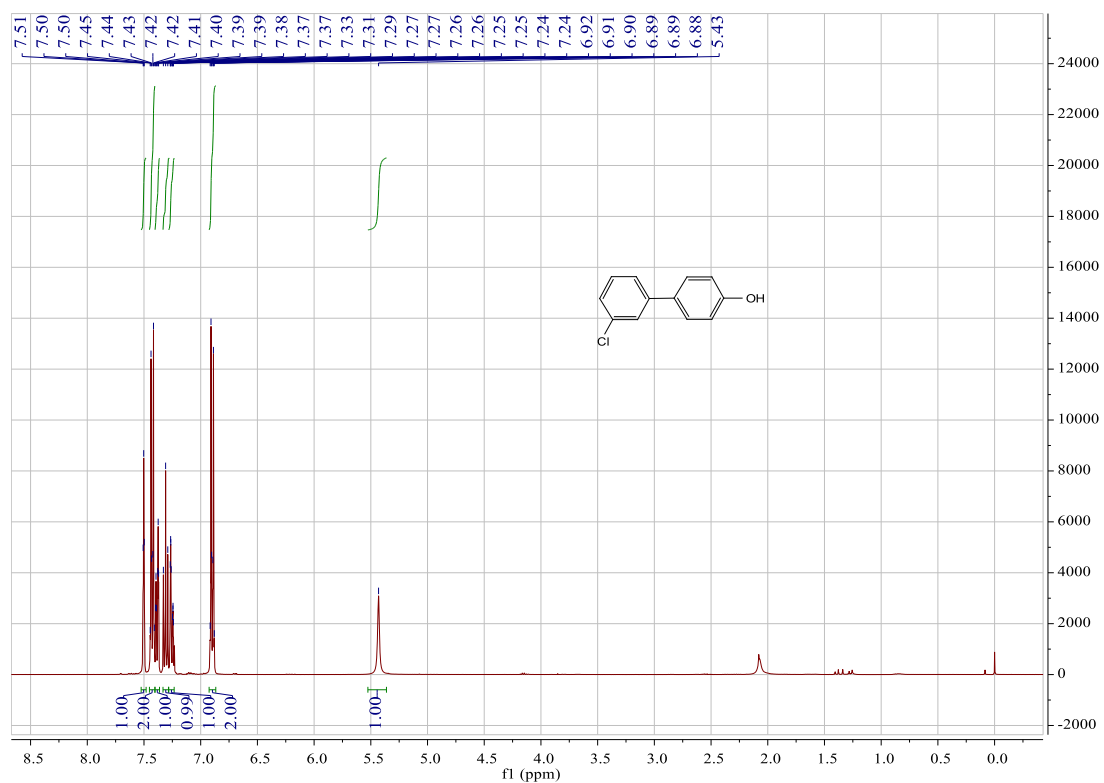

### <sup>13</sup>C NMR of compound **5af**

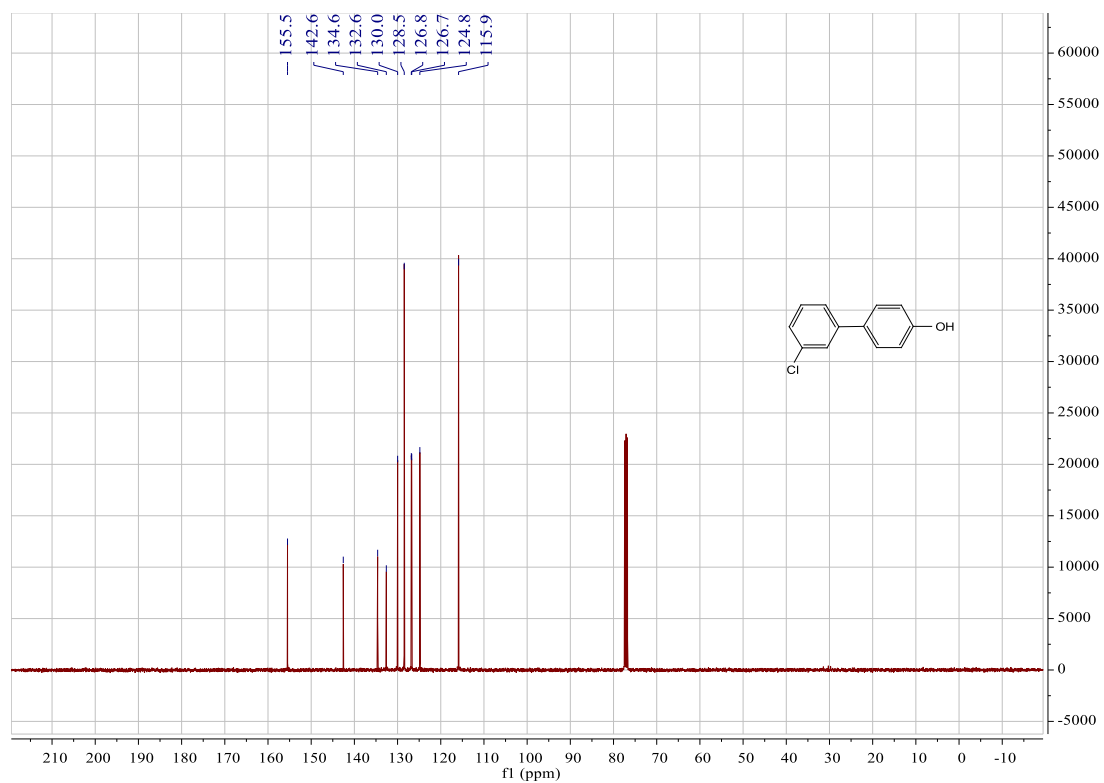

<sup>1</sup>H NMR of compound **5ag**

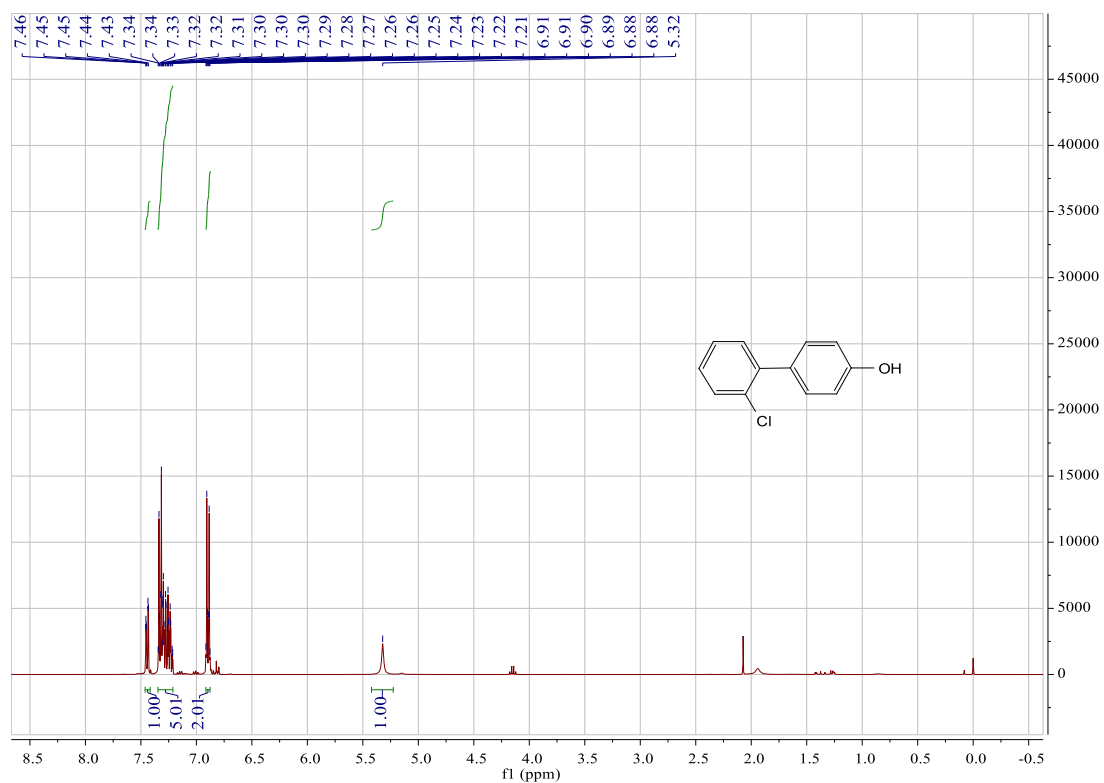

<sup>13</sup>C NMR of compound **5ag**

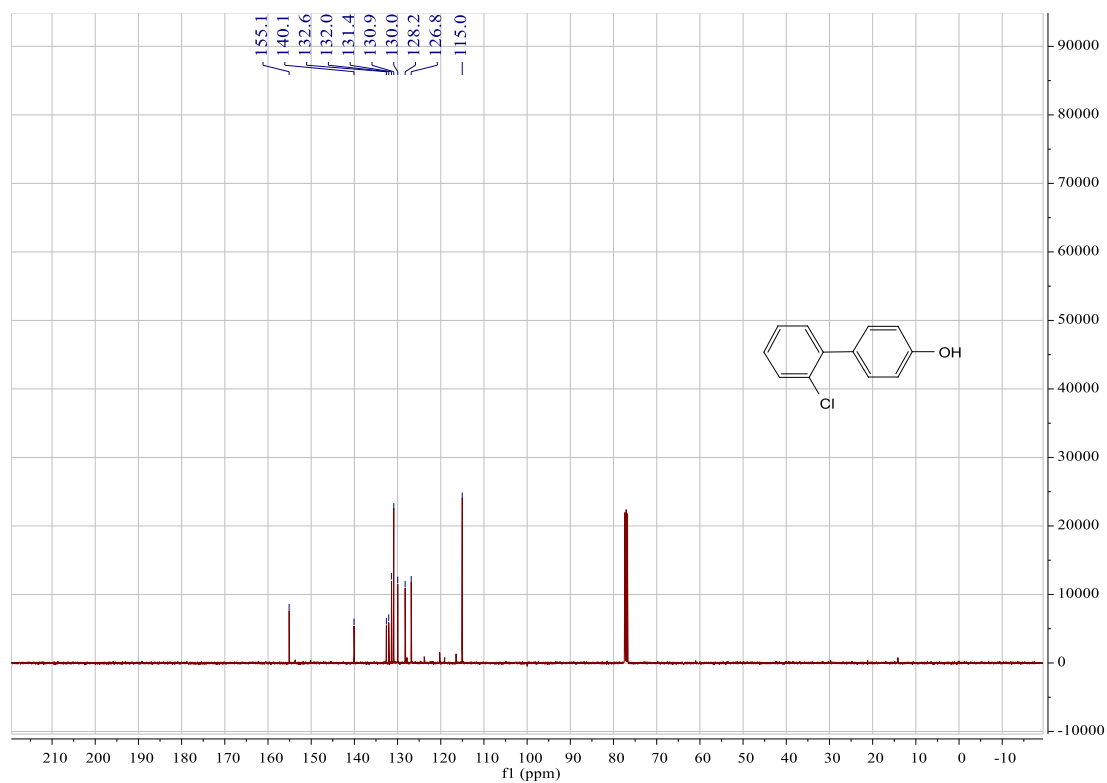

### <sup>1</sup>H NMR of compound **5ah**

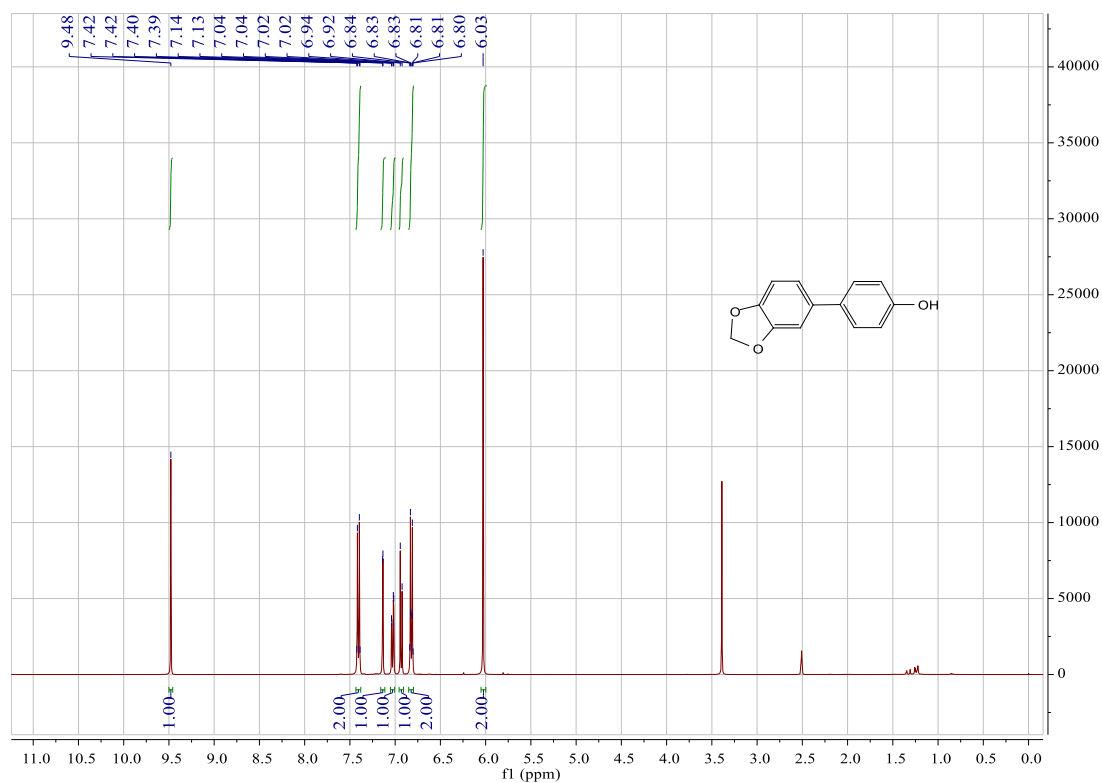

### <sup>13</sup>C NMR of compound **5ah**

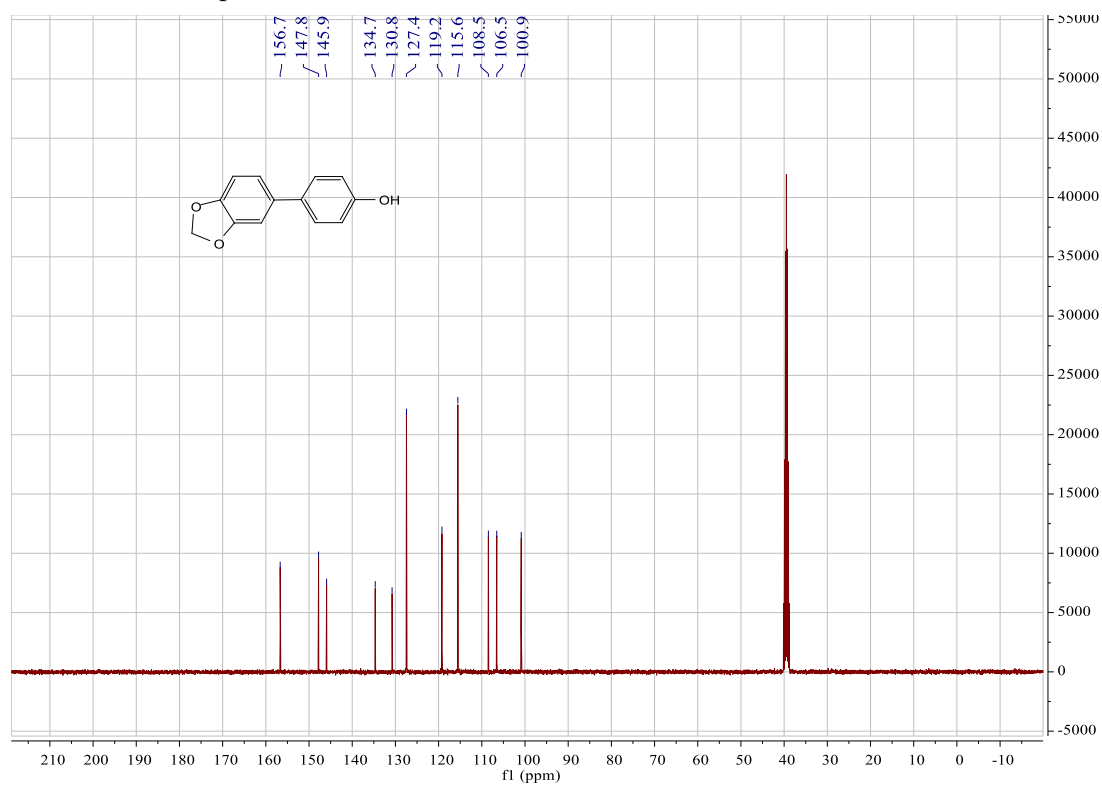

<sup>1</sup>H NMR of compound **5ba**

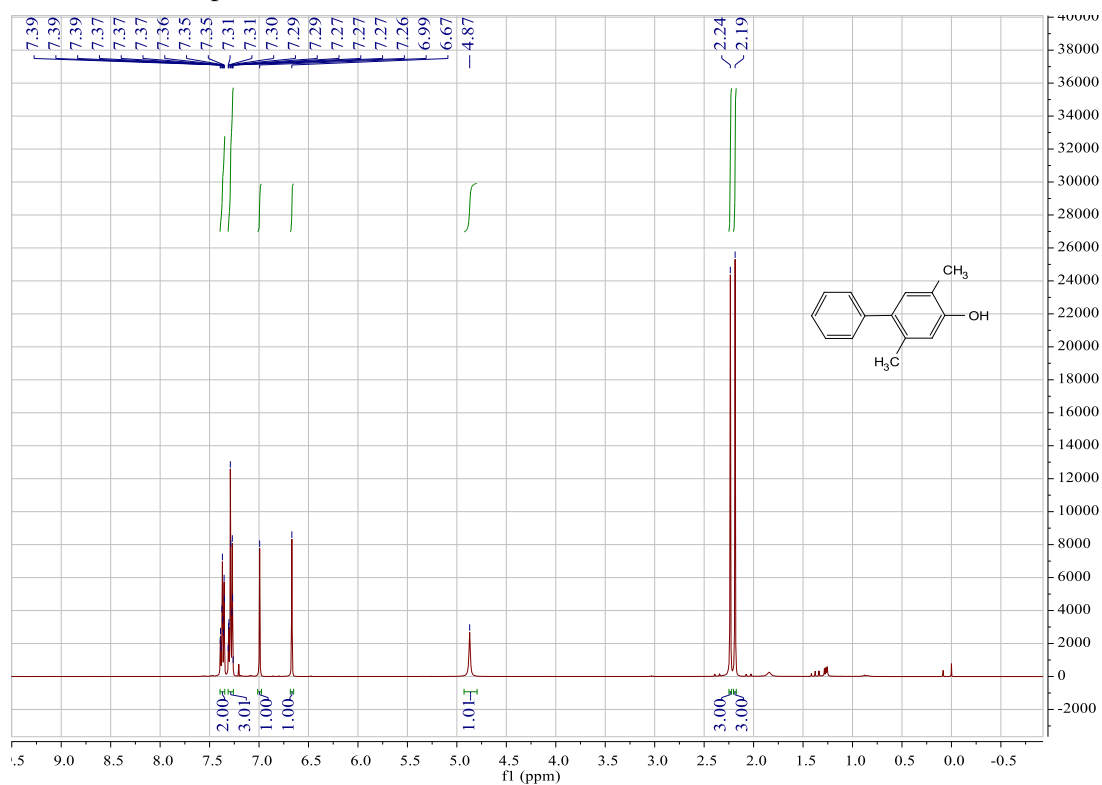

<sup>13</sup>C NMR of compound **5ba**

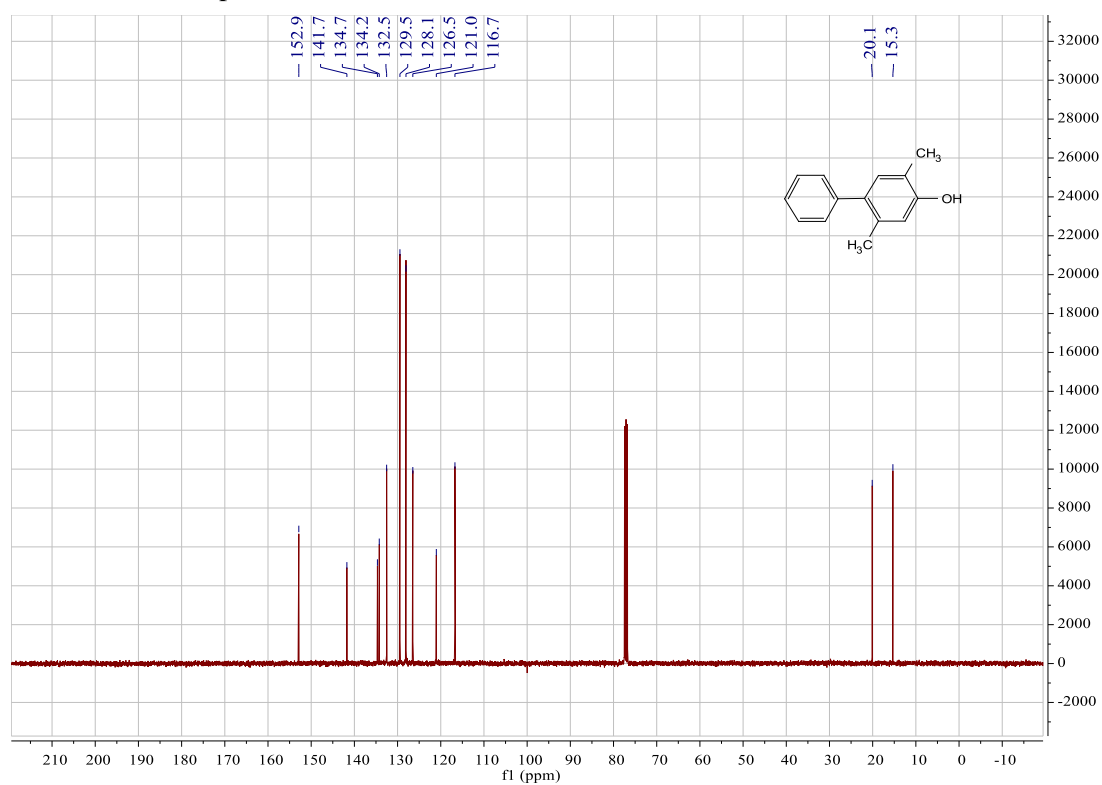



### <sup>1</sup>H NMR of compound **5ca**

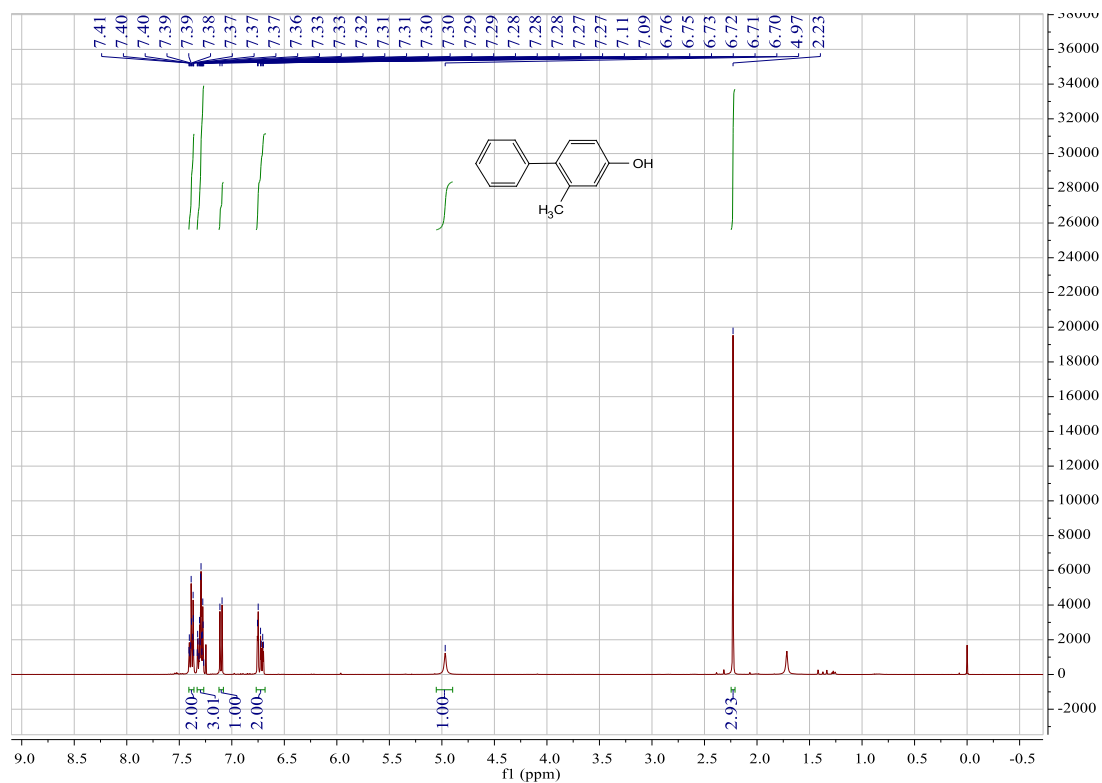

### <sup>13</sup>C NMR of compound **5ca**

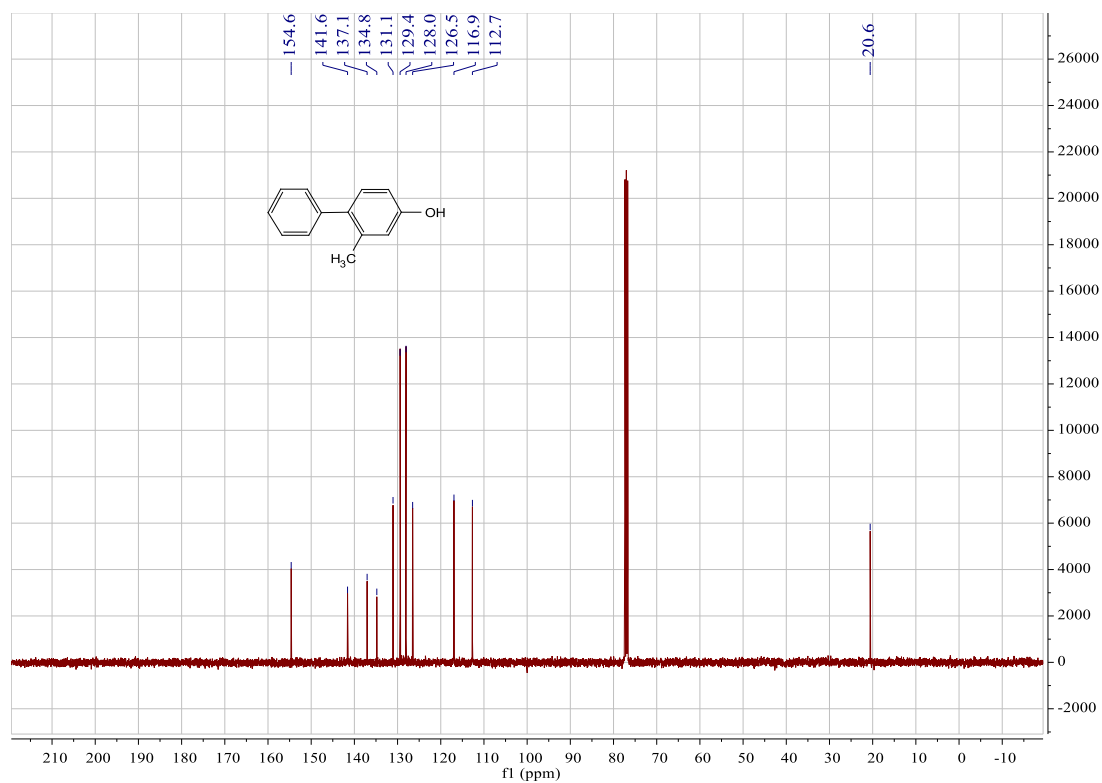

### <sup>1</sup>H NMR of compound 7

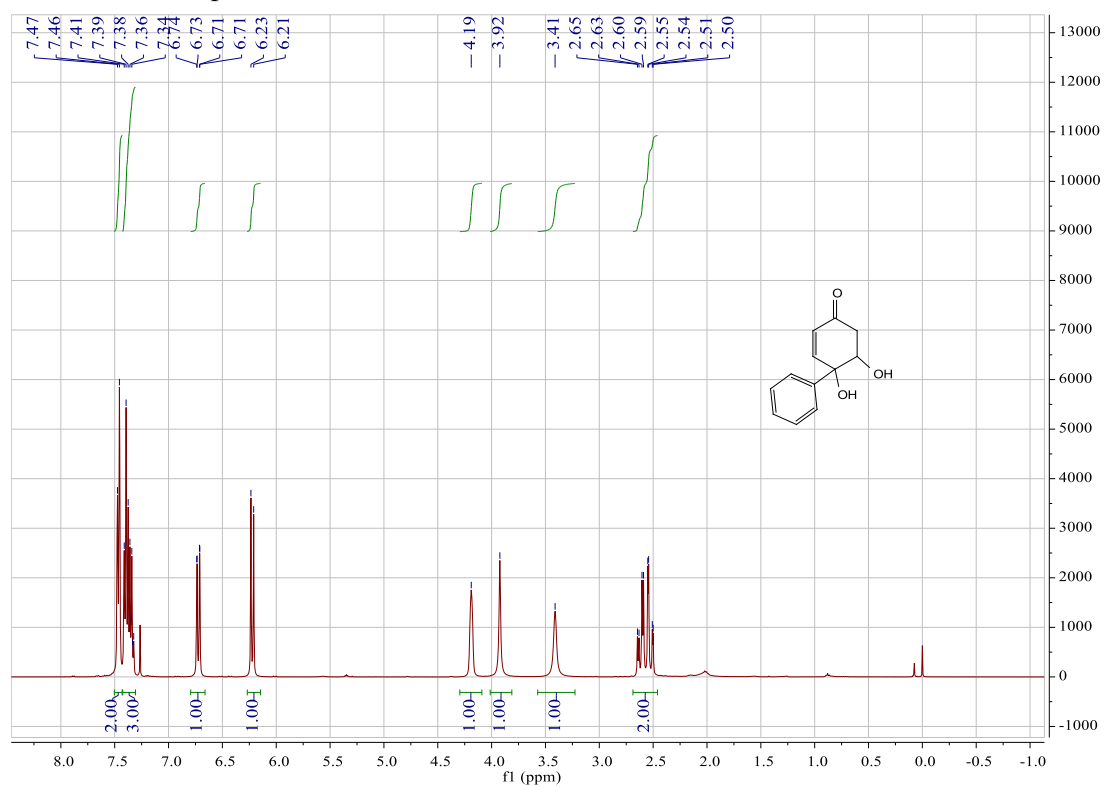

### <sup>13</sup>C NMR of compound 7

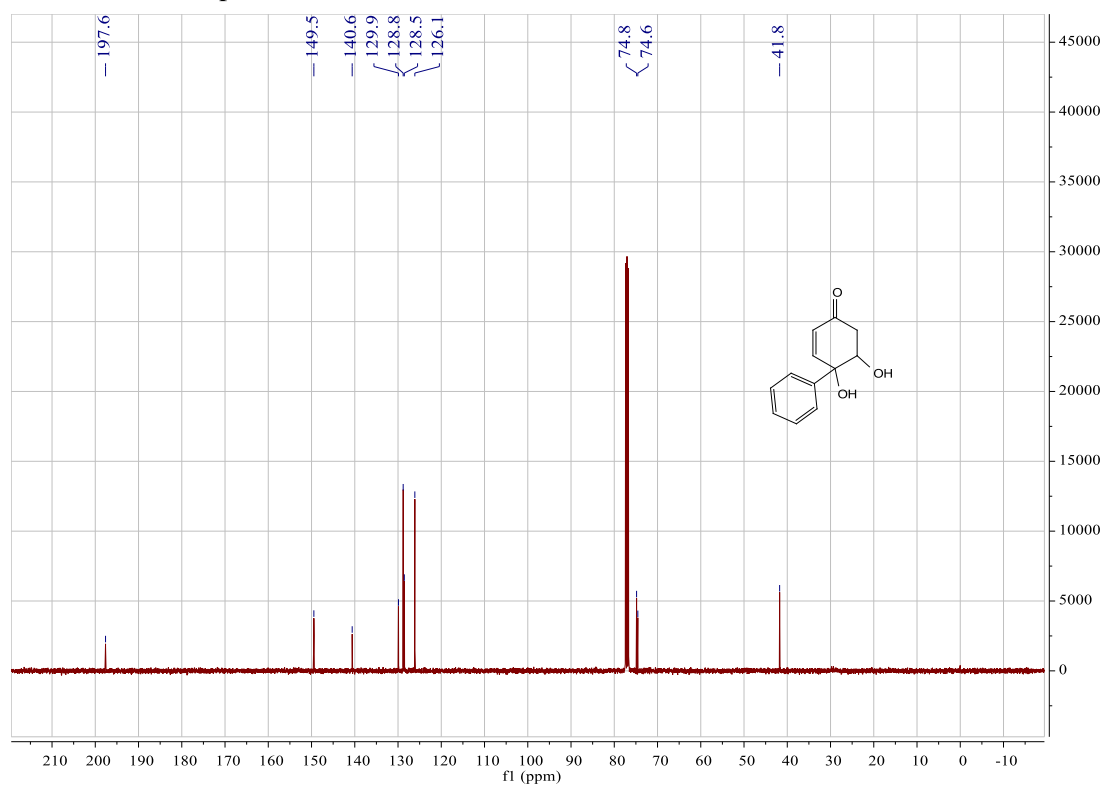

### <sup>1</sup>H NMR of compound Fenoxycard

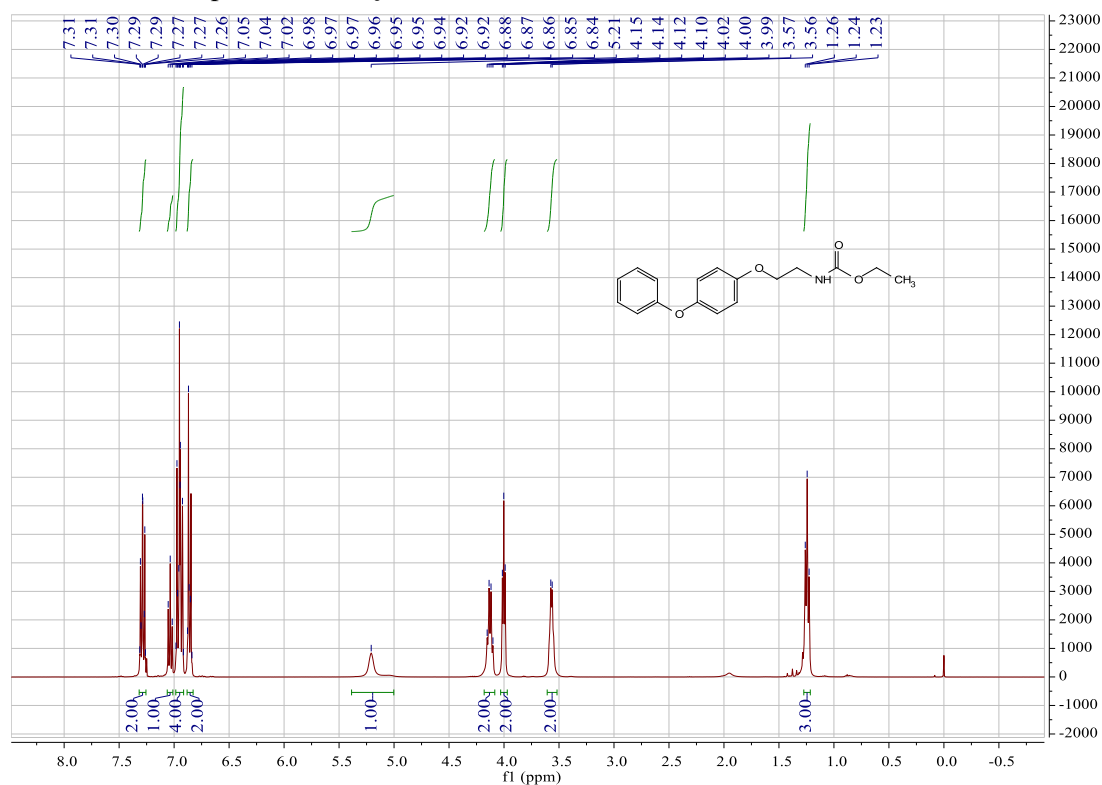

### <sup>13</sup>C NMR of compound Fenoxycard

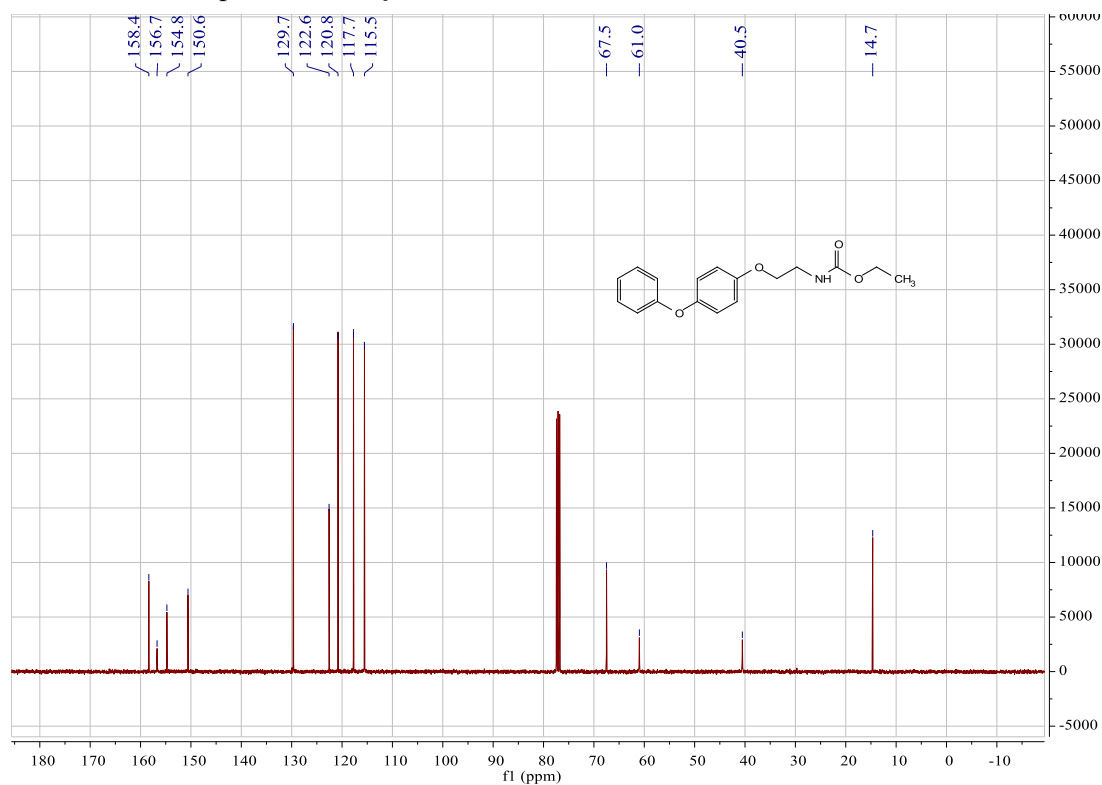

### <sup>1</sup>H NMR of compound **8**

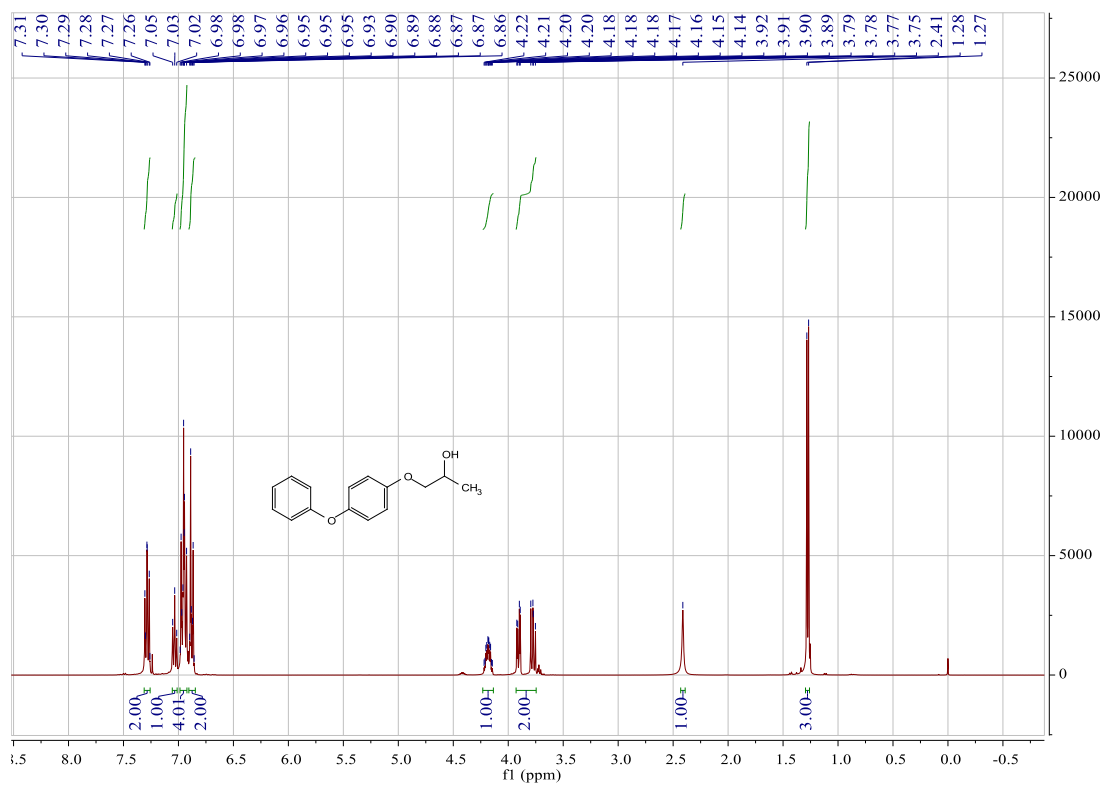

### <sup>13</sup>C NMR of compound **8**

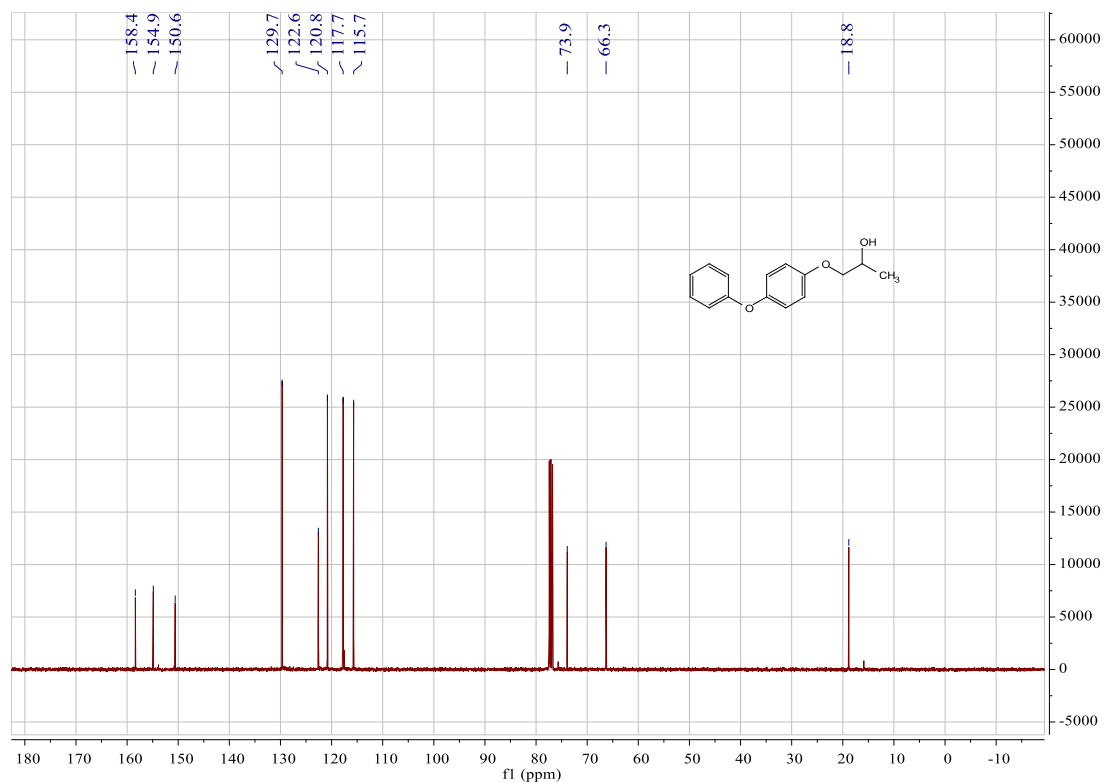

<sup>1</sup>H NMR of compound **Pyriproxyfen**

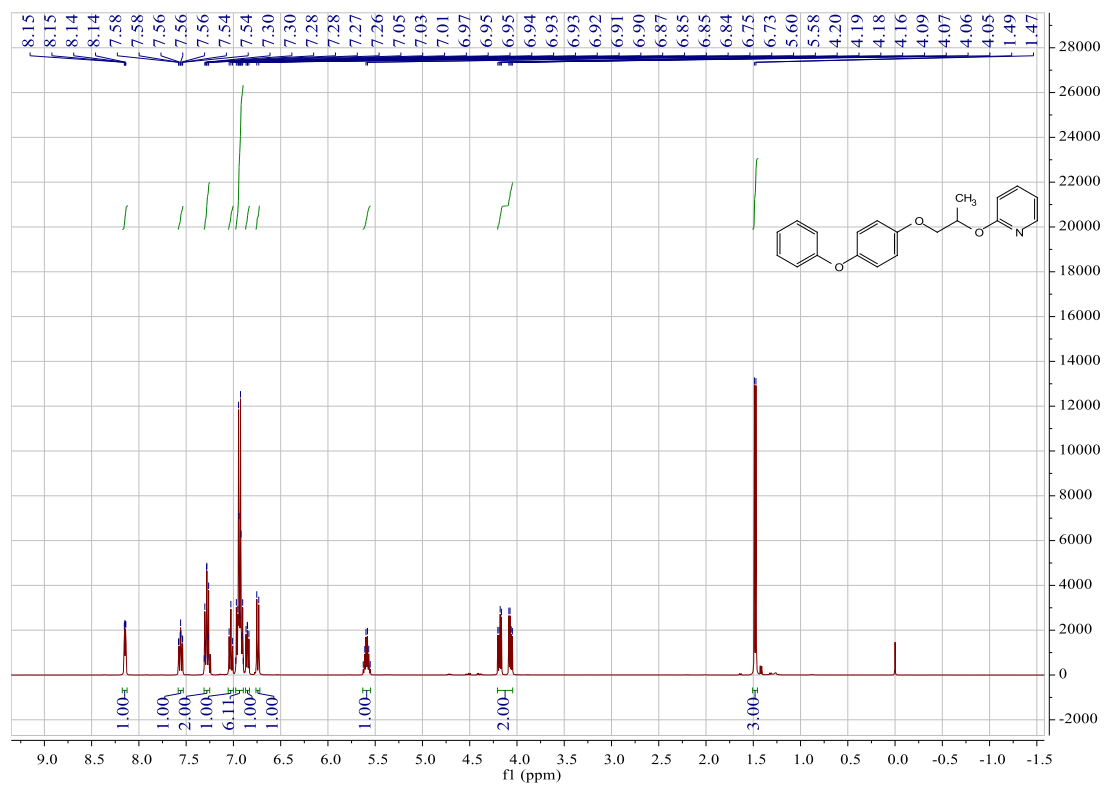

<sup>13</sup>C NMR of compound **Pyriproxyfen**

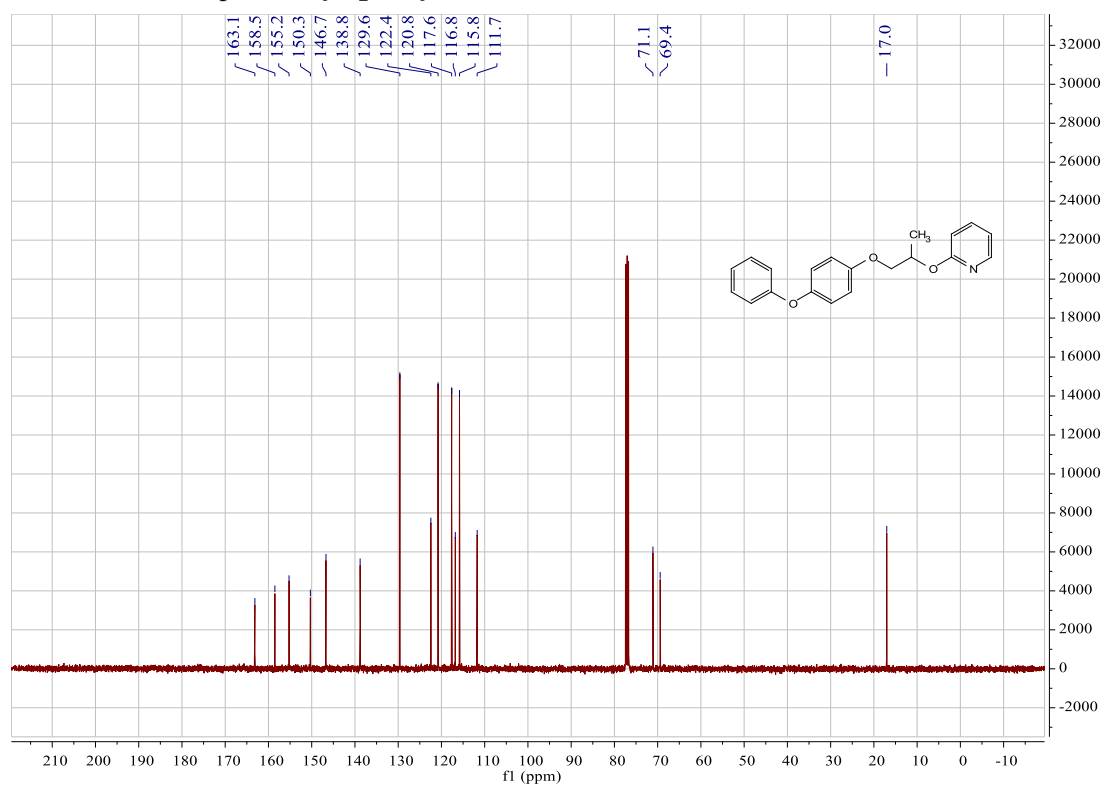

Supplement: d3cc01968c1.pdf [file d3cc01968c1.pdf]
